# Supplementary material for: Integrated Analysis of Transcriptome mRNA and miRNA Profiles Reveals Self-Protective Mechanism of Bovine MECs Induced by LPS
Source: Front Vet Sci. 2022 Jun 23;9:890043. doi: 10.3389/fvets.2022.890043 (PMC9260119; doi:10.3389/fvets.2022.890043)
Supplement: Supplementary Table 2 — The differentially expressed genes (DEGs) in LPS-induced 4, 8, and 12 h bMECs. (A) DEGs in LPS-induced 4 h bMECs. (B) DEGs in LPS-induced 8 h bMECs. (C) DEGs in LPS-induced 12 h bMECs. [file Table_2.XLSX]

## Sheet: 4h vs 0h differential mRNAs
Supplementary Table 2A：The differentially expressed mRNAs in LPS induced 4h bMECs.
test_id	gene_id	nearest_ref_id	gene	locus	gene_id	symbol	Annotation	GO_term	KEGG	status	bMEC_Lps_4h_fpkm	bMEC_Lps_0h_fpkm	log2(fold_change)	up or downregulated	p_value	significant
XLOC_032441	XLOC_032441	ENSBTAT00000008663	INHBE	chr5:56332209-56335907	ENSBTAG00000006599	INHBE	Bos taurus inhibin, beta E (INHBE), mRNA. [Source:RefSeq mRNA;Acc:NM_001205842]	GO:0040007(growth);GO:0005179(hormone activity);GO:0008083(growth factor activity);GO:0005576(extracellular region)	04350(TGF-beta signaling pathway)	OK	15.4448	268.222	-4.11823	down	5e-05	yes
XLOC_024429	XLOC_024429	ENSBTAT00000010367;ENSBTAT00000010366	IFIT1	chr26:11103950-11111090	ENSBTAG00000007881	IFIT1	interferon-induced protein with tetratricopeptide repeats 1 [Source:HGNC Symbol;Acc:HGNC:5407]	GO:0005515(protein binding);GO:0071357(cellular response to type I interferon);GO:0050689(negative regulation of defense response to virus by host);GO:0019060(intracellular transport of viral protein in host cell);GO:0051097(negative regulation of helicase activity);GO:0071360(cellular response to exogenous dsRNA);GO:0032091(negative regulation of protein binding);GO:0045070(positive regulation o…	NA	OK	3.33369	56.0061	-4.07039	down	5e-05	yes
XLOC_007551	XLOC_007551	ENSBTAT00000022616	TRIB3	chr13:61175908-61187528	ENSBTAG00000017007	TRIB3	Bos taurus tribbles homolog 3 (Drosophila) (TRIB3), mRNA. [Source:RefSeq mRNA;Acc:NM_001076103]	GO:0070059(intrinsic apoptotic signaling pathway in response to endoplasmic reticulum stress);GO:0004860(protein kinase inhibitor activity);GO:0034976(response to endoplasmic reticulum stress);GO:0003714(transcription corepressor activity);GO:0006915(apoptotic process);GO:0016772(transferase activity, transferring phosphorus-containing groups);GO:0006468(protein phosphorylation);GO:0004672(protei…	NA	OK	3.40293	54.3149	-3.9965	down	5e-05	yes
XLOC_025349	XLOC_025349	ENSBTAT00000047341	C27H8orf4	chr27:34893818-34895119	ENSBTAG00000033304	C27H8orf4	Bos taurus chromosome 27 open reading frame, human C8orf4 (C27H8orf4), mRNA. [Source:RefSeq mRNA;Acc:NM_001035490]	GO:0006915(apoptotic process)	NA	OK	5.18101	78.9985	-3.93052	down	5e-05	yes
XLOC_002438	XLOC_002438	ENSBTAT00000013689	CHAC1	chr10:36598393-36600764	ENSBTAG00000010371	CHAC1	Bos taurus ChaC, cation transport regulator homolog 1 (E. coli) (CHAC1), mRNA. [Source:RefSeq mRNA;Acc:NM_001098882]	GO:0005112(Notch binding);GO:0022008(neurogenesis);GO:0005802(trans-Golgi network);GO:0010955(negative regulation of protein processing);GO:0045746(negative regulation of Notch signaling pathway);GO:0070059(intrinsic apoptotic signaling pathway in response to endoplasmic reticulum stress);GO:0005515(protein binding);GO:0005829(cytosol)	NA	OK	2.00009	25.9794	-3.69923	down	5e-05	yes
XLOC_017904	XLOC_017904	ENSBTAT00000009285	IGFBP5	chr2:105378990-105397707	ENSBTAG00000007062	IGFBP5	Bos taurus insulin-like growth factor binding protein 5 (IGFBP5), mRNA. [Source:RefSeq mRNA;Acc:NM_001105327]	GO:0019838(growth factor binding);GO:0005520(insulin-like growth factor binding);GO:0001558(regulation of cell growth);GO:0001968(fibronectin binding);GO:0043569(negative regulation of insulin-like growth factor receptor signaling pathway);GO:0044342(type B pancreatic cell proliferation);GO:0060056(mammary gland involution);GO:0051146(striated muscle cell differentiation);GO:0040008(regulation of…	NA	OK	1.08663	11.9372	-3.45752	down	0.01015	yes
XLOC_004197	XLOC_004197	-	-	chr11:28575920-28576215	ENSBTAG00000040118	-	Uncharacterized protein [Source:UniProtKB/TrEMBL;Acc:E1BMY6]	GO:0045095(keratin filament);GO:0005882(intermediate filament)	NA	OK	3.67941	37.771	-3.35973	down	0.03415	yes
XLOC_026617	XLOC_026617	-	-	chr29:44294061-44294411	ENSBTAG00000040118	-	Uncharacterized protein [Source:UniProtKB/TrEMBL;Acc:E1BMY6]	GO:0045095(keratin filament);GO:0005882(intermediate filament)	NA	OK	4.15352	33.1781	-2.99782	down	0.0122	yes
XLOC_023068	XLOC_023068	-	-	chr24:49098995-49099544	ENSBTAG00000040118	-	Uncharacterized protein [Source:UniProtKB/TrEMBL;Acc:E1BMY6]	GO:0045095(keratin filament);GO:0005882(intermediate filament)	NA	OK	1.82036	12.2206	-2.74702	down	0.0332	yes
XLOC_031379	XLOC_031379	ENSBTAT00000044712	DDIT3	chr5:56285007-56307931	ENSBTAG00000031544	DDIT3	Bos taurus DNA-damage-inducible transcript 3 (DDIT3), mRNA. [Source:RefSeq mRNA;Acc:NM_001078163]	GO:0070059(intrinsic apoptotic signaling pathway in response to endoplasmic reticulum stress);GO:0051209(release of sequestered calcium ion into cytosol);GO:0034976(response to endoplasmic reticulum stress);GO:0007050(cell cycle arrest);GO:0016055(Wnt signaling pathway);GO:0006986(response to unfolded protein);GO:0006950(response to stress);GO:0045893(positive regulation of transcription, DNA-tem…	04010(MAPK signaling pathway)	OK	23.7964	159.674	-2.74631	down	0.025	yes
XLOC_012051	XLOC_012051	-	-	chr17:19812888-19816119	ENSBTAG00000040118	-	Uncharacterized protein [Source:UniProtKB/TrEMBL;Acc:E1BMY6]	GO:0045095(keratin filament);GO:0005882(intermediate filament)	NA	OK	1.84143	11.8431	-2.68515	down	0.00015	yes
XLOC_026615	XLOC_026615	-	-	chr29:44292809-44293144	ENSBTAG00000040118	-	Uncharacterized protein [Source:UniProtKB/TrEMBL;Acc:E1BMY6]	GO:0045095(keratin filament);GO:0005882(intermediate filament)	NA	OK	9.08397	58.3537	-2.68343	down	0.0038	yes
XLOC_018104	XLOC_018104	ENSBTAT00000042886;ENSBTAT00000063922	SESN2	chr2:125696402-125714186	ENSBTAG00000002363	SESN2	Bos taurus sestrin 2 (SESN2), mRNA. [Source:RefSeq mRNA;Acc:NM_001024507]	GO:1901031(regulation of response to reactive oxygen species);GO:0005634(nucleus);GO:2000479(regulation of cAMP-dependent protein kinase activity);GO:0090526(regulation of gluconeogenesis involved in cellular glucose homeostasis);GO:0032042(mitochondrial DNA metabolic process);GO:0070328(triglyceride homeostasis);GO:0046323(glucose import);GO:0001932(regulation of protein phosphorylation);GO:0009…	04115(p53 signaling pathway)	OK	7.53079	47.9969	-2.67207	down	5e-05	yes
XLOC_027635	XLOC_027635	-	-	chr3:20153439-20153629	ENSBTAG00000040118	-	Uncharacterized protein [Source:UniProtKB/TrEMBL;Acc:E1BMY6]	GO:0045095(keratin filament);GO:0005882(intermediate filament)	NA	OK	12.7958	80.9752	-2.66181	down	0.0499	yes
XLOC_016792	XLOC_016792	-	-	chr2:34167098-34167634	ENSBTAG00000040118	-	Uncharacterized protein [Source:UniProtKB/TrEMBL;Acc:E1BMY6]	GO:0045095(keratin filament);GO:0005882(intermediate filament)	NA	OK	2.00508	12.443	-2.6336	down	0.01475	yes
XLOC_026609	XLOC_026609	-	-	chr29:44287169-44287888	ENSBTAG00000040118	-	Uncharacterized protein [Source:UniProtKB/TrEMBL;Acc:E1BMY6]	GO:0045095(keratin filament);GO:0005882(intermediate filament)	NA	OK	2.12067	12.6787	-2.57982	down	0.00485	yes
XLOC_026611	XLOC_026611	-	-	chr29:44288679-44288994	ENSBTAG00000040118	-	Uncharacterized protein [Source:UniProtKB/TrEMBL;Acc:E1BMY6]	GO:0045095(keratin filament);GO:0005882(intermediate filament)	NA	OK	6.28525	37.4336	-2.57429	down	0.013	yes
XLOC_039560	XLOC_039560	ENSBTAT00000055351;-	ENSBTAG00000004563	chrX:118758065-118809076	ENSBTAG00000004563	-	Bos taurus uncharacterized LOC618701 (LOC618701), mRNA. [Source:RefSeq mRNA;Acc:NM_001099723]	NA	NA	OK	7.5935	45.0789	-2.56961	down	0.0032	yes
XLOC_026607	XLOC_026607	-	-	chr29:44284521-44284734	ENSBTAG00000040118	-	Uncharacterized protein [Source:UniProtKB/TrEMBL;Acc:E1BMY6]	GO:0045095(keratin filament);GO:0005882(intermediate filament)	NA	OK	18.2197	103.171	-2.50147	down	0.02265	yes
XLOC_009805	XLOC_009805	ENSBTAT00000003767;ENSBTAT00000054469	FAM111B	chr15:83568473-83582435	ENSBTAG00000036016	FAM111B	family with sequence similarity 111, member B [Source:HGNC Symbol;Acc:HGNC:24200]	GO:0008152(metabolic process);GO:0003824(catalytic activity)	NA	OK	4.77821	26.7492	-2.48495	down	5e-05	yes
XLOC_013747	XLOC_013747	ENSBTAT00000061400;ENSBTAT00000064126;ENSBTAT00000009474	COX6B2,ENSBTAG00000044157	chr18:62566819-62574837	NA	NA	NA	NA	NA	OK	2.09661	11.4194	-2.44535	down	0.0007	yes
XLOC_022427	XLOC_022427	ENSBTAT00000002357	SYT4	chr24:12950355-12960313	ENSBTAG00000001801	SYT4	Bos taurus synaptotagmin IV (SYT4), mRNA. [Source:RefSeq mRNA;Acc:NM_001098108]	GO:0005515(protein binding);GO:0006887(exocytosis);GO:0008021(synaptic vesicle);GO:0005215(transporter activity);GO:0006810(transport);GO:0007269(neurotransmitter secretion);GO:0043005(neuron projection);GO:0048471(perinuclear region of cytoplasm);GO:0005509(calcium ion binding);GO:0016020(membrane);GO:0043231(intracellular membrane-bounded organelle);GO:0005886(plasma membrane)	NA	OK	5.26035	28.6449	-2.44505	down	5e-05	yes
XLOC_004348	XLOC_004348	ENSBTAT00000010206	SLC1A4	chr11:63290421-63395507	ENSBTAG00000007763	SLC1A4	Bos taurus solute carrier family 1 (glutamate/neutral amino acid transporter), member 4 (SLC1A4), mRNA. [Source:RefSeq mRNA;Acc:NM_001081577]	GO:0042470(melanosome);GO:0017153(sodium:dicarboxylate symporter activity);GO:0006835(dicarboxylic acid transport);GO:0015293(symporter activity);GO:0006810(transport);GO:0016021(integral component of membrane);GO:0015175(neutral amino acid transmembrane transporter activity);GO:0005882(intermediate filament);GO:0016020(membrane);GO:0035524(proline transmembrane transport);GO:0034590(L-hydroxypro…	NA	OK	8.60605	45.0326	-2.38755	down	5e-05	yes
XLOC_032575	XLOC_032575	-	-	chr5:68879800-68880198	ENSBTAG00000040118	-	Uncharacterized protein [Source:UniProtKB/TrEMBL;Acc:E1BMY6]	GO:0045095(keratin filament);GO:0005882(intermediate filament)	NA	OK	3.94442	20.5148	-2.37878	down	0.0127	yes
XLOC_016941	XLOC_016941	ENSBTAT00000022316	SLC39A10	chr2:84702675-84771331	ENSBTAG00000016782	SLC39A10	solute carrier family 39 (zinc transporter), member 10 [Source:HGNC Symbol;Acc:HGNC:20861]	GO:0046873(metal ion transmembrane transporter activity);GO:0030001(metal ion transport);GO:0055085(transmembrane transport);GO:0016020(membrane)	NA	OK	6.98902	36.0954	-2.36865	down	5e-05	yes
XLOC_013746	XLOC_013746	ENSBTAT00000063946	IL11	chr18:62560970-62565324	ENSBTAG00000047400	IL11	interleukin 11 [Source:HGNC Symbol;Acc:HGNC:5966]	GO:0005142(interleukin-11 receptor binding);GO:0005125(cytokine activity);GO:0008284(positive regulation of cell proliferation);GO:0005737(cytoplasm);GO:0046888(negative regulation of hormone secretion);GO:0050731(positive regulation of peptidyl-tyrosine phosphorylation);GO:0033138(positive regulation of peptidyl-serine phosphorylation);GO:0043410(positive regulation of MAPK cascade);GO:0045944(p…	NA	OK	9.12254	45.6162	-2.32204	down	5e-05	yes
XLOC_030221	XLOC_030221	-	-	chr4:120398453-120398668	ENSBTAG00000040118	-	Uncharacterized protein [Source:UniProtKB/TrEMBL;Acc:E1BMY6]	GO:0045095(keratin filament);GO:0005882(intermediate filament)	NA	OK	23.2609	112.478	-2.27366	down	0.013	yes
XLOC_026614	XLOC_026614	-	-	chr29:44291293-44292676	ENSBTAG00000040118	-	Uncharacterized protein [Source:UniProtKB/TrEMBL;Acc:E1BMY6]	GO:0045095(keratin filament);GO:0005882(intermediate filament)	NA	OK	3.22507	14.6628	-2.18476	down	0.00075	yes
XLOC_036274	XLOC_036274	ENSBTAT00000028590	ST8SIA4	chr7:102452980-102556182	ENSBTAG00000021445	ST8SIA4	ST8 alpha-N-acetyl-neuraminide alpha-2,8-sialyltransferase 4 [Source:HGNC Symbol;Acc:HGNC:10871]	GO:0097503(sialylation);GO:0008373(sialyltransferase activity);GO:0030173(integral component of Golgi membrane);GO:0006486(protein glycosylation);GO:0016757(transferase activity, transferring glycosyl groups);GO:0016740(transferase activity);GO:0005794(Golgi apparatus);GO:0016021(integral component of membrane);GO:0003828(alpha-N-acetylneuraminate alpha-2,8-sialyltransferase activity);GO:0016020(…	NA	OK	3.5039	15.4671	-2.14217	down	5e-05	yes
XLOC_009432	XLOC_009432	-	-	chr15:50845174-50845625	ENSBTAG00000040118	-	Uncharacterized protein [Source:UniProtKB/TrEMBL;Acc:E1BMY6]	GO:0045095(keratin filament);GO:0005882(intermediate filament)	NA	OK	15.7881	69.3958	-2.13601	down	0.00095	yes
XLOC_022013	XLOC_022013	ENSBTAT00000007903	GTPBP2	chr23:17117322-17126857	ENSBTAG00000006016	GTPBP2	Bos taurus GTP binding protein 2 (GTPBP2), mRNA. [Source:RefSeq mRNA;Acc:NM_001083421]	GO:0003924(GTPase activity);GO:0006184(GTP catabolic process);GO:0005525(GTP binding);GO:0000166(nucleotide binding);GO:0043231(intracellular membrane-bounded organelle);GO:0005515(protein binding)	NA	OK	9.20211	39.5923	-2.10518	down	5e-05	yes
XLOC_026613	XLOC_026613	-	-	chr29:44289551-44290831	ENSBTAG00000040118	-	Uncharacterized protein [Source:UniProtKB/TrEMBL;Acc:E1BMY6]	GO:0045095(keratin filament);GO:0005882(intermediate filament)	NA	OK	4.27972	17.8628	-2.06137	down	0.00105	yes
XLOC_014546	XLOC_014546	-	-	chr18:62550281-62551896	ENSBTAG00000040118	-	Uncharacterized protein [Source:UniProtKB/TrEMBL;Acc:E1BMY6]	GO:0045095(keratin filament);GO:0005882(intermediate filament)	NA	OK	2.94934	11.1963	-1.92456	down	0.01835	yes
XLOC_038261	XLOC_038261	-	-	chr9:83320159-83320538	ENSBTAG00000040118	-	Uncharacterized protein [Source:UniProtKB/TrEMBL;Acc:E1BMY6]	GO:0045095(keratin filament);GO:0005882(intermediate filament)	NA	OK	3.90147	14.6253	-1.90638	down	0.05	yes
XLOC_008188	XLOC_008188	ENSBTAT00000009992	GEM	chr14:72385681-72399660	ENSBTAG00000007596	GEM	Bos taurus GTP binding protein overexpressed in skeletal muscle (GEM), transcript variant 1, mRNA. [Source:RefSeq mRNA;Acc:NM_001083732]	GO:0006184(GTP catabolic process);GO:0007264(small GTPase mediated signal transduction);GO:0005525(GTP binding);GO:0007165(signal transduction);GO:0005622(intracellular);GO:0015031(protein transport);GO:0000166(nucleotide binding);GO:0005515(protein binding);GO:0005634(nucleus);GO:0016020(membrane);GO:0051310(metaphase plate congression);GO:0072686(mitotic spindle);GO:0051233(spindle midzone);GO:…	NA	OK	4.0123	14.868	-1.88971	down	0.00025	yes
XLOC_031933	XLOC_031933	-	-	chr5:114593435-114593878	ENSBTAG00000040118	-	Uncharacterized protein [Source:UniProtKB/TrEMBL;Acc:E1BMY6]	GO:0045095(keratin filament);GO:0005882(intermediate filament)	NA	OK	3.40277	12.4066	-1.86633	down	0.0371	yes
XLOC_026690	XLOC_026690	ENSBTAT00000023529	CARNS1	chr29:45957523-45964420	ENSBTAG00000017690	CARNS1	carnosine synthase 1 [Source:HGNC Symbol;Acc:HGNC:29268]	GO:0046872(metal ion binding);GO:0005524(ATP binding);GO:0047730(carnosine synthase activity);GO:0035499(carnosine biosynthetic process);GO:0016887(ATPase activity)	NA	OK	3.32594	12.1032	-1.86356	down	0.00015	yes
XLOC_012188	XLOC_012188	ENSBTAT00000011801	ACAD10	chr17:57648596-57697403	ENSBTAG00000001164	ACAD10	acyl-CoA dehydrogenase family, member 10 [Source:HGNC Symbol;Acc:HGNC:21597]	GO:0016627(oxidoreductase activity, acting on the CH-CH group of donors);GO:0003995(acyl-CoA dehydrogenase activity);GO:0050660(flavin adenine dinucleotide binding);GO:0055114(oxidation-reduction process);GO:0016772(transferase activity, transferring phosphorus-containing groups);GO:0016787(hydrolase activity);GO:0008152(metabolic process)	NA	OK	5.00381	18.1188	-1.85639	down	5e-05	yes
XLOC_034813	XLOC_034813	ENSBTAT00000024029	MKNK2	chr7:22787204-22796782	ENSBTAG00000018049	MKNK2	MAP kinase interacting serine/threonine kinase 2 [Source:HGNC Symbol;Acc:HGNC:7111]	GO:0009103(lipopolysaccharide biosynthetic process);GO:0016773(phosphotransferase activity, alcohol group as acceptor);GO:0004713(protein tyrosine kinase activity);GO:0016772(transferase activity, transferring phosphorus-containing groups);GO:0006468(protein phosphorylation);GO:0004674(protein serine/threonine kinase activity);GO:0004672(protein kinase activity);GO:0005524(ATP binding);GO:0000166…	04010(MAPK signaling pathway);04910(Insulin signaling pathway)	OK	24.0439	83.2156	-1.79118	down	0.0001	yes
XLOC_006366	XLOC_006366	-	-	chr12:89226747-89227207	ENSBTAG00000040118	-	Uncharacterized protein [Source:UniProtKB/TrEMBL;Acc:E1BMY6]	GO:0045095(keratin filament);GO:0005882(intermediate filament)	NA	OK	3.44824	11.8469	-1.78058	down	0.03625	yes
XLOC_027633	XLOC_027633	-	-	chr3:20150533-20150984	ENSBTAG00000040118	-	Uncharacterized protein [Source:UniProtKB/TrEMBL;Acc:E1BMY6]	GO:0045095(keratin filament);GO:0005882(intermediate filament)	NA	OK	3.6908	12.4105	-1.74955	down	0.03865	yes
XLOC_031579	XLOC_031579	-	-	chr5:80502465-80502676	ENSBTAG00000040118	-	Uncharacterized protein [Source:UniProtKB/TrEMBL;Acc:E1BMY6]	GO:0045095(keratin filament);GO:0005882(intermediate filament)	NA	OK	127.365	427.88	-1.74823	down	0.0033	yes
XLOC_029649	XLOC_029649	ENSBTAT00000021310	KLHL7	chr4:31900914-31956645	ENSBTAG00000016010	KLHL7	Bos taurus kelch-like 7 (Drosophila) (KLHL7), mRNA. [Source:RefSeq mRNA;Acc:NM_001076037]	GO:0005515(protein binding);GO:0031463(Cul3-RING ubiquitin ligase complex);GO:0042803(protein homodimerization activity);GO:0005654(nucleoplasm);GO:0005730(nucleolus);GO:0005886(plasma membrane);GO:0005737(cytoplasm);GO:0005634(nucleus)	NA	OK	5.66469	18.8269	-1.73272	down	0.00035	yes
XLOC_006656	XLOC_006656	-	-	chr13:32517139-32517552	ENSBTAG00000040118	-	Uncharacterized protein [Source:UniProtKB/TrEMBL;Acc:E1BMY6]	GO:0045095(keratin filament);GO:0005882(intermediate filament)	NA	OK	9.54249	31.1388	-1.70628	down	0.0143	yes
XLOC_026608	XLOC_026608	-	-	chr29:44285003-44286049	ENSBTAG00000040118	-	Uncharacterized protein [Source:UniProtKB/TrEMBL;Acc:E1BMY6]	GO:0045095(keratin filament);GO:0005882(intermediate filament)	NA	OK	3.17705	10.2923	-1.69581	down	0.0107	yes
XLOC_016581	XLOC_016581	-	-	chr19:61223544-61223795	ENSBTAG00000040118	-	Uncharacterized protein [Source:UniProtKB/TrEMBL;Acc:E1BMY6]	GO:0045095(keratin filament);GO:0005882(intermediate filament)	NA	OK	20.5671	65.1048	-1.66243	down	0.0348	yes
XLOC_028214	XLOC_028214	ENSBTAT00000011454;ENSBTAT00000007938	ENSBTAG00000008690	chr3:102623620-102659082	ENSBTAG00000008690	-	Bos taurus solute carrier family 6 (neurotransmitter transporter, glycine), member 9 (SLC6A9), transcript variant 2, mRNA. [Source:RefSeq mRNA;Acc:NM_001242342]	GO:0015849(organic acid transport);GO:0005283(sodium:amino acid symporter activity);GO:0003333(amino acid transmembrane transport);GO:0015293(symporter activity);GO:0006836(neurotransmitter transport);GO:0005887(integral component of plasma membrane);GO:0005328(neurotransmitter:sodium symporter activity);GO:0055085(transmembrane transport);GO:0006810(transport);GO:0016021(integral component of me…	NA	OK	12.121	38.1033	-1.65241	down	0.0002	yes
XLOC_037085	XLOC_037085	ENSBTAT00000023618	NFIL3	chr8:87878454-87893182	ENSBTAG00000017763	NFIL3	Bos taurus nuclear factor, interleukin 3 regulated (NFIL3), mRNA. [Source:RefSeq mRNA;Acc:NM_001075240]	GO:0043565(sequence-specific DNA binding);GO:0006366(transcription from RNA polymerase II promoter);GO:0006351(transcription, DNA-templated);GO:0003700(sequence-specific DNA binding transcription factor activity);GO:0003677(DNA binding);GO:0006355(regulation of transcription, DNA-templated);GO:0005634(nucleus);GO:0071353(cellular response to interleukin-4);GO:0010628(positive regulation of gene e…	NA	OK	20.5107	63.9758	-1.64115	down	0.0001	yes
XLOC_007319	XLOC_007319	ENSBTAT00000011456	SLC6A9	chr13:38064362-38161610	ENSBTAG00000006043	SLC6A9	Bos taurus solute carrier family 6 (neurotransmitter transporter, glycine), member 9 (SLC6A9), mRNA. [Source:RefSeq mRNA;Acc:NM_001102032]	GO:0015849(organic acid transport);GO:0005283(sodium:amino acid symporter activity);GO:0003333(amino acid transmembrane transport);GO:0015293(symporter activity);GO:0006836(neurotransmitter transport);GO:0005887(integral component of plasma membrane);GO:0005328(neurotransmitter:sodium symporter activity);GO:0055085(transmembrane transport);GO:0006810(transport);GO:0016021(integral component of me…	NA	OK	20.8659	64.8023	-1.6349	down	0.00105	yes
XLOC_011796	XLOC_011796	ENSBTAT00000010525;ENSBTAT00000063771	NCF2	chr16:66081121-66128113	ENSBTAG00000008004	NCF2	neutrophil cytosolic factor 2 [Source:HGNC Symbol;Acc:HGNC:7661]	GO:0005515(protein binding);GO:0048365(Rac GTPase binding);GO:0042554(superoxide anion generation);GO:0001669(acrosomal vesicle);GO:0005737(cytoplasm);GO:0005730(nucleolus);GO:0008022(protein C-terminus binding)	04145(Phagosome);04670(Leukocyte transendothelial migration);05140(Leishmaniasis)	OK	5.49353	17.0496	-1.63393	down	0.00145	yes
XLOC_022083	XLOC_022083	ENSBTAT00000059981	SNORD52	chr23:27324094-27326211	ENSBTAG00000042163	SNORD52	Small nucleolar RNA SNORD52 [Source:RFAM;Acc:RF00276]	NA	NA	OK	16.7228	50.7807	-1.60247	down	0.0009	yes
XLOC_007064	XLOC_007064	ENSBTAT00000043503	PKIG	chr13:73669766-73749996	ENSBTAG00000005275	PKIG	Bos taurus protein kinase (cAMP-dependent, catalytic) inhibitor gamma (PKIG), mRNA. [Source:RefSeq mRNA;Acc:NM_205812]	GO:0006469(negative regulation of protein kinase activity);GO:0004862(cAMP-dependent protein kinase inhibitor activity);GO:0042308(negative regulation of protein import into nucleus);GO:0000122(negative regulation of transcription from RNA polymerase II promoter);GO:0071901(negative regulation of protein serine/threonine kinase activity)	NA	OK	4.32893	13.0421	-1.59109	down	0.0076	yes
XLOC_013583	XLOC_013583	ENSBTAT00000001702	PPP1R15A	chr18:55925890-55929294	ENSBTAG00000001294	PPP1R15A	protein phosphatase 1, regulatory subunit 15A [Source:HGNC Symbol;Acc:HGNC:14375]	GO:0030968(endoplasmic reticulum unfolded protein response);GO:1902310(positive regulation of peptidyl-serine dephosphorylation);GO:0070972(protein localization to endoplasmic reticulum);GO:0045943(positive regulation of transcription from RNA polymerase I promoter);GO:0035308(negative regulation of protein dephosphorylation);GO:0032516(positive regulation of phosphoprotein phosphatase activity);…	NA	OK	3.36629	10.1225	-1.58833	down	0.00265	yes
XLOC_037797	XLOC_037797	ENSBTAT00000027125	KLF4	chr8:98843683-98848280	ENSBTAG00000020355	KLF4	Bos taurus Kruppel-like factor 4 (gut) (KLF4), mRNA. [Source:RefSeq mRNA;Acc:NM_001105385]	GO:0046872(metal ion binding);GO:0003676(nucleic acid binding);GO:0001010(sequence-specific DNA binding transcription factor recruiting transcription factor activity);GO:0048730(epidermis morphogenesis);GO:0032526(response to retinoic acid);GO:0031077(post-embryonic camera-type eye development);GO:0009913(epidermal cell differentiation);GO:0001085(RNA polymerase II transcription factor binding);G…	NA	OK	5.14569	15.3409	-1.57594	down	0.00095	yes
XLOC_033741	XLOC_033741	ENSBTAT00000064893;ENSBTAT00000001500	BMP2K	chr6:95348688-95441932	ENSBTAG00000001126	BMP2K	Uncharacterized protein [Source:UniProtKB/TrEMBL;Acc:F1MUI8]	GO:0016772(transferase activity, transferring phosphorus-containing groups);GO:0016310(phosphorylation);GO:0016301(kinase activity);GO:0008152(metabolic process);GO:0030500(regulation of bone mineralization);GO:0019208(phosphatase regulator activity);GO:0050790(regulation of catalytic activity);GO:0004672(protein kinase activity);GO:0005634(nucleus);GO:0005654(nucleoplasm)	NA	OK	17.3522	51.2192	-1.56157	down	0.00455	yes
XLOC_015800	XLOC_015800	-	-	chr19:18845596-18847822	ENSBTAG00000040118	-	Uncharacterized protein [Source:UniProtKB/TrEMBL;Acc:E1BMY6]	GO:0045095(keratin filament);GO:0005882(intermediate filament)	NA	OK	5.00036	14.7549	-1.56109	down	0.003	yes
XLOC_007500	XLOC_007500	ENSBTAT00000027003	CDH26	chr13:57056735-57103118	ENSBTAG00000020261	CDH26	cadherin 26 [Source:HGNC Symbol;Acc:HGNC:15902]	GO:0007156(homophilic cell adhesion via plasma membrane adhesion molecules);GO:0007155(cell adhesion);GO:0005886(plasma membrane);GO:0016021(integral component of membrane);GO:0005509(calcium ion binding);GO:0016020(membrane)	NA	OK	4.01215	11.6716	-1.54055	down	0.0023	yes
XLOC_040323	XLOC_040323	-	-	chrX:118653963-118659451	ENSBTAG00000040118	-	Uncharacterized protein [Source:UniProtKB/TrEMBL;Acc:E1BMY6]	GO:0045095(keratin filament);GO:0005882(intermediate filament)	NA	OK	9.05128	26.1678	-1.5316	down	0.0343	yes
XLOC_011842	XLOC_011842	ENSBTAT00000011265	ATF3	chr16:72820025-72832974	ENSBTAG00000008545	ATF3	Bos taurus activating transcription factor 3 (ATF3), mRNA. [Source:RefSeq mRNA;Acc:NM_001046193]	GO:0043565(sequence-specific DNA binding);GO:0006351(transcription, DNA-templated);GO:0003700(sequence-specific DNA binding transcription factor activity);GO:0003677(DNA binding);GO:0006355(regulation of transcription, DNA-templated);GO:0005634(nucleus);GO:0001078(RNA polymerase II core promoter proximal region sequence-specific DNA binding transcription factor activity involved in negative regul…	NA	OK	45.7652	131.146	-1.51885	down	5e-05	yes
XLOC_007623	XLOC_007623	ENSBTAT00000021569	TGM2	chr13:67662602-67697657	ENSBTAG00000016208	TGM2	Bos taurus transglutaminase 2 (C polypeptide, protein-glutamine-gamma-glutamyltransferase) (TGM2), mRNA. [Source:RefSeq mRNA;Acc:NM_177507]	GO:0018149(peptide cross-linking);GO:0003810(protein-glutamine gamma-glutamyltransferase activity);GO:0016746(transferase activity, transferring acyl groups);GO:0016740(transferase activity);GO:0046872(metal ion binding);GO:0051561(positive regulation of mitochondrial calcium ion concentration);GO:0060662(salivary gland cavitation);GO:0032471(negative regulation of endoplasmic reticulum calcium i…	05016(Huntington's disease)	OK	14.9412	42.3565	-1.50329	down	0.00035	yes
XLOC_016684	XLOC_016684	ENSBTAT00000038684	COL5A2	chr2:7139380-7300524	ENSBTAG00000027020	COL5A2	collagen, type V, alpha 2 [Source:HGNC Symbol;Acc:HGNC:2210]	GO:0005201(extracellular matrix structural constituent);GO:0005515(protein binding);GO:0005581(collagen trimer);GO:0031012(extracellular matrix);GO:0071230(cellular response to amino acid stimulus);GO:0046332(SMAD binding);GO:0030199(collagen fibril organization);GO:0001501(skeletal system development);GO:0043588(skin development);GO:1903225(negative regulation of endodermal cell differentiation)…	NA	OK	8.84375	25.0379	-1.50138	down	0.0001	yes
XLOC_030342	XLOC_030342	ENSBTAT00000006008	FAM126A	chr4:31738766-31825459	ENSBTAG00000004575	FAM126A	family with sequence similarity 126, member A [Source:HGNC Symbol;Acc:HGNC:24587]	GO:0005886(plasma membrane);GO:0005737(cytoplasm)	NA	OK	9.55512	27.0395	-1.50072	down	0.00055	yes
XLOC_030461	XLOC_030461	ENSBTAT00000028707	MDFIC	chr4:53756423-53854749	ENSBTAG00000021543	MDFIC	Bos taurus MyoD family inhibitor domain containing (MDFIC), mRNA. [Source:RefSeq mRNA;Acc:NM_001101102]	GO:0042308(negative regulation of protein import into nucleus);GO:0005730(nucleolus);GO:0045892(negative regulation of transcription, DNA-templated);GO:0005515(protein binding);GO:0005654(nucleoplasm);GO:0005794(Golgi apparatus)	NA	OK	10.2821	29.0807	-1.49993	down	0.0007	yes
XLOC_025913	XLOC_025913	ENSBTAT00000000187	DDIT4	chr28:28481275-28485410	ENSBTAG00000000163	DDIT4	Bos taurus DNA-damage-inducible transcript 4 (DDIT4), mRNA. [Source:RefSeq mRNA;Acc:NM_001075922]	GO:0033137(negative regulation of peptidyl-serine phosphorylation);GO:0010801(negative regulation of peptidyl-threonine phosphorylation);GO:0001666(response to hypoxia);GO:0008283(cell proliferation);GO:0048011(neurotrophin TRK receptor signaling pathway);GO:0032007(negative regulation of TOR signaling);GO:0007420(brain development);GO:0009968(negative regulation of signal transduction);GO:003018…	04150(mTOR signaling pathway)	OK	52.6939	148.4	-1.49378	down	0.00035	yes
XLOC_030211	XLOC_030211	-	-	chr4:120381143-120398181	ENSBTAG00000040118	-	Uncharacterized protein [Source:UniProtKB/TrEMBL;Acc:E1BMY6]	GO:0045095(keratin filament);GO:0005882(intermediate filament)	NA	OK	16.5376	46.3803	-1.48776	down	0.0027	yes
XLOC_029112	XLOC_029112	ENSBTAT00000063885;ENSBTAT00000019679	CTH	chr3:75082358-75109443	ENSBTAG00000014791	CTH	Bos taurus cystathionase (cystathionine gamma-lyase) (CTH), mRNA. [Source:RefSeq mRNA;Acc:NM_001024567]	GO:0030170(pyridoxal phosphate binding);GO:0009058(biosynthetic process);GO:0008152(metabolic process);GO:0003824(catalytic activity);GO:0044540(L-cystine L-cysteine-lyase (deaminating));GO:0044524(protein sulfhydration);GO:0043123(positive regulation of I-kappaB kinase/NF-kappaB signaling);GO:0051092(positive regulation of NF-kappaB transcription factor activity);GO:2001234(negative regulation o…	00260(Glycine, serine and threonine metabolism);00260(Glycine, serine and threonine metabolism);00270(Cysteine and methionine metabolism);00270(Cysteine and methionine metabolism);00450(Selenoamino acid metabolism);00450(Selenoamino acid metabolism);00910(Nitrogen metabolism);00910(Nitrogen metabolism)	OK	32.9883	91.3358	-1.46923	down	0.00045	yes
XLOC_021383	XLOC_021383	ENSBTAT00000011001	CDKN1A	chr23:10560498-10568780	ENSBTAG00000008353	CDKN1A	Bos taurus cyclin-dependent kinase inhibitor 1A (p21, Cip1) (CDKN1A), mRNA. [Source:RefSeq mRNA;Acc:NM_001098958]	GO:0004861(cyclin-dependent protein serine/threonine kinase inhibitor activity);GO:0007050(cell cycle arrest);GO:0005634(nucleus);GO:2000278(regulation of DNA biosynthetic process);GO:0033158(regulation of protein import into nucleus, translocation);GO:0071850(mitotic cell cycle arrest);GO:0045736(negative regulation of cyclin-dependent protein serine/threonine kinase activity);GO:0043068(positiv…	04012(ErbB signaling pathway);04110(Cell cycle);04115(p53 signaling pathway);05200(Pathways in cancer);05214(Glioma);05215(Prostate cancer);05218(Melanoma);05219(Bladder cancer);05220(Chronic myeloid leukemia)	OK	9.89416	27.168	-1.45726	down	0.00165	yes
XLOC_010794	XLOC_010794	ENSBTAT00000034028	DHRS3	chr16:41985338-42040600	ENSBTAG00000024493	DHRS3	Bos taurus dehydrogenase/reductase (SDR family) member 3 (DHRS3), mRNA. [Source:RefSeq mRNA;Acc:NM_174180]	GO:0050662(coenzyme binding);GO:0055114(oxidation-reduction process);GO:0016491(oxidoreductase activity);GO:0009058(biosynthetic process);GO:0008152(metabolic process);GO:0003824(catalytic activity);GO:0030278(regulation of ossification);GO:0060021(palate development);GO:0060349(bone morphogenesis);GO:0003151(outflow tract morphogenesis);GO:0001523(retinoid metabolic process);GO:0004745(retinol d…	NA	OK	7.95588	21.774	-1.45251	down	0.01015	yes
XLOC_002948	XLOC_002948	-	-	chr10:86297445-86298168	ENSBTAG00000040118	-	Uncharacterized protein [Source:UniProtKB/TrEMBL;Acc:E1BMY6]	GO:0045095(keratin filament);GO:0005882(intermediate filament)	NA	OK	18.5104	50.3771	-1.44443	down	0.0055	yes
XLOC_038357	XLOC_038357	ENSBTAT00000039096	SYNJ2	chr9:96023839-96092510	ENSBTAG00000000817	SYNJ2	synaptojanin 2 [Source:HGNC Symbol;Acc:HGNC:11504]	GO:0046856(phosphatidylinositol dephosphorylation);GO:0042578(phosphoric ester hydrolase activity);GO:0003676(nucleic acid binding);GO:0000166(nucleotide binding);GO:0004439(phosphatidylinositol-4,5-bisphosphate 5-phosphatase activity);GO:0005515(protein binding)	00562(Inositol phosphate metabolism);04070(Phosphatidylinositol signaling system)	OK	4.08481	11.0835	-1.44007	down	0.001	yes
XLOC_014547	XLOC_014547	ENSBTAT00000028044	TMEM190	chr18:62554621-62557112	ENSBTAG00000021057	TMEM190	Bos taurus transmembrane protein 190 (TMEM190), mRNA. [Source:RefSeq mRNA;Acc:NM_001205559]	GO:0016021(integral component of membrane);GO:0002079(inner acrosomal membrane);GO:0043621(protein self-association);GO:0002244(hematopoietic progenitor cell differentiation);GO:0016020(membrane);GO:0005634(nucleus)	NA	OK	43.2847	116.807	-1.4322	down	0.0018	yes
XLOC_024227	XLOC_024227	ENSBTAT00000063483	ENSBTAG00000047379	chr25:37125205-37175162	ENSBTAG00000047379	-	Bos taurus cytochrome P450, subfamily IIIA, polypeptide 4 (CYP3A4), mRNA. [Source:RefSeq mRNA;Acc:NM_001099367]	GO:0016712(oxidoreductase activity, acting on paired donors, with incorporation or reduction of molecular oxygen, reduced flavin or flavoprotein as one donor, and incorporation of one atom of oxygen);GO:0016705(oxidoreductase activity, acting on paired donors, with incorporation or reduction of molecular oxygen);GO:0004497(monooxygenase activity);GO:0020037(heme binding);GO:0005506(iron ion bindi…	00140(Steroid hormone biosynthesis);00591(Linoleic acid metabolism);00830(Retinol metabolism);00980(Metabolism of xenobiotics by cytochrome P450);00982(Drug metabolism - cytochrome P450);00983(Drug metabolism - other enzymes)	OK	4.23245	11.4102	-1.43076	down	0.0049	yes
XLOC_005409	XLOC_005409	ENSBTAT00000057533	GRP78	chr11:96115348-96119306	ENSBTAG00000007662	GRP78	Uncharacterized protein [Source:UniProtKB/TrEMBL;Acc:F1N614]	GO:0006950(response to stress);GO:0005524(ATP binding);GO:0000166(nucleotide binding);GO:0051787(misfolded protein binding);GO:0006987(activation of signaling protein activity involved in unfolded protein response);GO:0021589(cerebellum structural organization);GO:0031398(positive regulation of protein ubiquitination);GO:0021680(cerebellar Purkinje cell layer development);GO:0005788(endoplasmic r…	NA	OK	347.882	926.257	-1.41281	down	0.00125	yes
XLOC_003551	XLOC_003551	ENSBTAT00000061376	TLN2	chr10:47301488-47796327	ENSBTAG00000003667	TLN2	talin 2 [Source:HGNC Symbol;Acc:HGNC:15447]	GO:0001726(ruffle);GO:0005925(focal adhesion);GO:0005158(insulin receptor binding);GO:0051015(actin filament binding);GO:0015629(actin cytoskeleton);GO:0007155(cell adhesion);GO:0003779(actin binding);GO:0005856(cytoskeleton);GO:0005198(structural molecule activity);GO:0045202(synapse);GO:0005916(fascia adherens);GO:0005515(protein binding);GO:0007016(cytoskeletal anchoring at plasma membrane);GO…	04510(Focal adhesion)	OK	8.3141	22.0166	-1.40496	down	0.0009	yes
XLOC_011500	XLOC_011500	ENSBTAT00000034160	KMO	chr16:35975057-36045361	ENSBTAG00000014439	KMO	Bos taurus kynurenine 3-monooxygenase (kynurenine 3-hydroxylase) (KMO), mRNA. [Source:RefSeq mRNA;Acc:NM_001243298]	GO:0019363(pyridine nucleotide biosynthetic process);GO:0009435(NAD biosynthetic process);GO:0005741(mitochondrial outer membrane);GO:0004497(monooxygenase activity);GO:0050660(flavin adenine dinucleotide binding);GO:0031966(mitochondrial membrane);GO:0055114(oxidation-reduction process);GO:0016491(oxidoreductase activity);GO:0005739(mitochondrion);GO:0016021(integral component of membrane);GO:00…	NA	OK	4.14186	10.9289	-1.3998	down	0.006	yes
XLOC_032108	XLOC_032108	ENSBTAT00000047703	EEA1	chr5:22802398-22932418	ENSBTAG00000000421	EEA1	early endosome antigen 1 [Source:HGNC Symbol;Acc:HGNC:3185]	GO:0046872(metal ion binding);GO:0005969(serine-pyruvate aminotransferase complex);GO:0044308(axonal spine);GO:0005768(endosome);GO:0031410(cytoplasmic vesicle);GO:0005515(protein binding);GO:0019897(extrinsic component of plasma membrane);GO:0030742(GTP-dependent protein binding);GO:0006906(vesicle fusion);GO:0005545(1-phosphatidylinositol binding);GO:0005769(early endosome);GO:0042803(protein h…	NA	OK	5.37473	14.1218	-1.39366	down	0.0011	yes
XLOC_026550	XLOC_026550	ENSBTAT00000030071	SLC3A2	chr29:41855870-41896760	ENSBTAG00000013240	SLC3A2	Bos taurus solute carrier family 3 (activators of dibasic and neutral amino acid transport), member 2 (SLC3A2), mRNA. [Source:RefSeq mRNA;Acc:NM_001024488]	GO:0005975(carbohydrate metabolic process);GO:0003824(catalytic activity);GO:0005515(protein binding);GO:0005654(nucleoplasm);GO:0005886(plasma membrane);GO:0005737(cytoplasm);GO:0005634(nucleus);GO:0043169(cation binding)	NA	OK	70.1697	184.077	-1.39139	down	0.0008	yes
XLOC_003217	XLOC_003217	ENSBTAT00000005109	LARP6	chr10:17662472-17683274	ENSBTAG00000003915	LARP6	la-related protein 6 [Source:RefSeq peptide;Acc:NP_001092675]	GO:0006396(RNA processing);GO:0030529(ribonucleoprotein complex);GO:0003723(RNA binding);GO:0005634(nucleus);GO:0000166(nucleotide binding)	NA	OK	37.923	99.186	-1.38706	down	0.0005	yes
XLOC_004912	XLOC_004912	ENSBTAT00000006419	MTHFD2	chr11:10407372-10431047	ENSBTAG00000004881	MTHFD2	Bos taurus methylenetetrahydrofolate dehydrogenase (NADP+ dependent) 2, methenyltetrahydrofolate cyclohydrolase (MTHFD2), mRNA. [Source:RefSeq mRNA;Acc:NM_001075755]	GO:0009396(folic acid-containing compound biosynthetic process);GO:0006730(one-carbon metabolic process);GO:0004488(methylenetetrahydrofolate dehydrogenase (NADP+) activity);GO:0004477(methenyltetrahydrofolate cyclohydrolase activity);GO:0055114(oxidation-reduction process);GO:0016491(oxidoreductase activity);GO:0005739(mitochondrion);GO:0016787(hydrolase activity);GO:0008152(metabolic process);G…	00670(One carbon pool by folate)	OK	14.4244	37.5917	-1.38191	down	0.0017	yes
XLOC_036152	XLOC_036152	ENSBTAT00000019758	SPARC	chr7:64878193-64900828	ENSBTAG00000014835	SPARC	Bos taurus secreted protein, acidic, cysteine-rich (osteonectin) (SPARC), mRNA. [Source:RefSeq mRNA;Acc:NM_174464]	GO:0005604(basement membrane);GO:0005515(protein binding);GO:0005615(extracellular space);GO:0005578(proteinaceous extracellular matrix);GO:0007165(signal transduction);GO:0046872(metal ion binding);GO:0005509(calcium ion binding);GO:0050840(extracellular matrix binding);GO:0071363(cellular response to growth factor stimulus);GO:0031012(extracellular matrix);GO:0060348(bone development);GO:004212…	NA	OK	4.0487	10.5422	-1.38064	down	0.0049	yes
XLOC_029911	XLOC_029911	-	-	chr4:77909460-77909801	ENSBTAG00000040118	-	Uncharacterized protein [Source:UniProtKB/TrEMBL;Acc:E1BMY6]	GO:0045095(keratin filament);GO:0005882(intermediate filament)	NA	OK	32.3492	84.0825	-1.37808	down	0.01745	yes
XLOC_010140	XLOC_010140	-	-	chr15:40300071-40300224	ENSBTAG00000040118	-	Uncharacterized protein [Source:UniProtKB/TrEMBL;Acc:E1BMY6]	GO:0045095(keratin filament);GO:0005882(intermediate filament)	NA	OK	443.858	1149.35	-1.37265	down	0.0423	yes
XLOC_008531	XLOC_008531	ENSBTAT00000037329	ZHX2	chr14:18368988-18389401	ENSBTAG00000026309	ZHX2	zinc fingers and homeoboxes 2 [Source:HGNC Symbol;Acc:HGNC:18513]	GO:0043565(sequence-specific DNA binding);GO:0003700(sequence-specific DNA binding transcription factor activity);GO:0003677(DNA binding);GO:0046872(metal ion binding);GO:0006355(regulation of transcription, DNA-templated);GO:0005634(nucleus);GO:0042803(protein homodimerization activity);GO:0005654(nucleoplasm);GO:0005515(protein binding);GO:0045892(negative regulation of transcription, DNA-templ…	NA	OK	4.15383	10.6709	-1.36117	down	0.0045	yes
XLOC_029278	XLOC_029278	ENSBTAT00000002687	KDM4A	chr3:102926061-102965737	ENSBTAG00000002078	KDM4A	lysine (K)-specific demethylase 4A [Source:HGNC Symbol;Acc:HGNC:22978]	GO:0005515(protein binding);GO:0046872(metal ion binding);GO:0008270(zinc ion binding);GO:0005634(nucleus);GO:0014898(cardiac muscle hypertrophy in response to stress);GO:0070544(histone H3-K36 demethylation);GO:0051864(histone demethylase activity (H3-K36 specific));GO:0016577(histone demethylation);GO:0005730(nucleolus);GO:0045892(negative regulation of transcription, DNA-templated);GO:0035064(…	NA	OK	29.7428	76.2813	-1.35879	down	0.00075	yes
XLOC_020695	XLOC_020695	ENSBTAT00000000611	HYAL1	chr22:50600488-50601799	ENSBTAG00000000483	HYAL1	Bos taurus hyaluronoglucosaminidase 1 (HYAL1), mRNA. [Source:RefSeq mRNA;Acc:NM_001017941]	GO:0050679(positive regulation of epithelial cell proliferation);GO:0008134(transcription factor binding);GO:0045766(positive regulation of angiogenesis);GO:0051216(cartilage development);GO:0009615(response to virus);GO:0030308(negative regulation of cell growth);GO:0030212(hyaluronan metabolic process);GO:0030307(positive regulation of cell growth);GO:0005615(extracellular space);GO:0016798(hyd…	00531(Glycosaminoglycan degradation)	OK	4.50205	11.5188	-1.35534	down	0.0334	yes
XLOC_027380	XLOC_027380	ENSBTAT00000015933	OLFML2B	chr3:7527737-7577290	ENSBTAG00000034147	OLFML2B	Bos taurus olfactomedin-like 2B (OLFML2B), mRNA. [Source:RefSeq mRNA;Acc:NM_001100354]	GO:0005515(protein binding);GO:0050840(extracellular matrix binding);GO:0031012(extracellular matrix);GO:0030198(extracellular matrix organization);GO:0005576(extracellular region)	NA	OK	8.81264	22.4301	-1.34779	down	0.0018	yes
XLOC_027674	XLOC_027674	ENSBTAT00000026724	TXNIP	chr3:21489081-21493251	ENSBTAG00000020060	TXNIP	Bos taurus thioredoxin interacting protein (TXNIP), mRNA. [Source:RefSeq mRNA;Acc:NM_001101875]	GO:0048008(platelet-derived growth factor receptor signaling pathway);GO:0006979(response to oxidative stress);GO:0043086(negative regulation of catalytic activity);GO:0004857(enzyme inhibitor activity);GO:0006606(protein import into nucleus);GO:0000122(negative regulation of transcription from RNA polymerase II promoter);GO:0005515(protein binding);GO:0005737(cytoplasm);GO:0071228(cellular respo…	NA	OK	5.86121	14.8321	-1.33945	down	0.0039	yes
XLOC_033791	XLOC_033791	ENSBTAT00000005165	ARHGAP24	chr6:102500169-102667475	ENSBTAG00000003959	ARHGAP24	Rho GTPase activating protein 24 [Source:HGNC Symbol;Acc:HGNC:25361]	GO:0007165(signal transduction);GO:0005096(GTPase activator activity);GO:0005622(intracellular);GO:1900028(negative regulation of ruffle assembly);GO:0035313(wound healing, spreading of epidermal cells);GO:0035021(negative regulation of Rac protein signal transduction);GO:0032863(activation of Rac GTPase activity);GO:0030675(Rac GTPase activator activity);GO:0005925(focal adhesion);GO:0005515(pro…	NA	OK	5.01606	12.6349	-1.33278	down	0.0037	yes
XLOC_015803	XLOC_015803	ENSBTAT00000022573	RAB11FIP4	chr19:18850324-18886769	ENSBTAG00000016972	RAB11FIP4	RAB11 family interacting protein 4 (class II) [Source:HGNC Symbol;Acc:HGNC:30267]	GO:0032154(cleavage furrow);GO:0030139(endocytic vesicle);GO:0055038(recycling endosome membrane);GO:0000910(cytokinesis);GO:0042803(protein homodimerization activity);GO:0005515(protein binding);GO:0017137(Rab GTPase binding);GO:0005768(endosome);GO:0030306(ADP-ribosylation factor binding);GO:0030496(midbody);GO:0005615(extracellular space)	NA	OK	10.5945	26.6374	-1.33015	down	0.00345	yes
XLOC_033322	XLOC_033322	ENSBTAT00000020263	PLA2G12A	chr6:16828630-16843001	ENSBTAG00000015230	PLA2G12A	Bos taurus phospholipase A2, group XIIA (PLA2G12A), mRNA. [Source:RefSeq mRNA;Acc:NM_001098063]	GO:0006644(phospholipid metabolic process);GO:0004623(phospholipase A2 activity);GO:0016042(lipid catabolic process);GO:0005509(calcium ion binding);GO:0005794(Golgi apparatus);GO:0005783(endoplasmic reticulum);GO:0005622(intracellular);GO:0005576(extracellular region)	00564(Glycerophospholipid metabolism);00565(Ether lipid metabolism);00590(Arachidonic acid metabolism);00591(Linoleic acid metabolism);00592(alpha-Linolenic acid metabolism);04010(MAPK signaling pathway);04270(Vascular smooth muscle contraction);04370(VEGF signaling pathway);04664(Fc epsilon RI signaling pathway);04730(Long-term depression);04912(GnRH signaling pathway)	OK	4.38354	10.9814	-1.32489	down	0.00275	yes
XLOC_016326	XLOC_016326	ENSBTAT00000061581;ENSBTAT00000038317	HDAC5	chr19:44538238-44575554	ENSBTAG00000016254	HDAC5	histone deacetylase 5 [Source:HGNC Symbol;Acc:HGNC:14068]	GO:0004407(histone deacetylase activity);GO:0016568(chromatin modification);GO:0016787(hydrolase activity);GO:0051153(regulation of striated muscle cell differentiation);GO:0048742(regulation of skeletal muscle fiber development);GO:0042220(response to cocaine);GO:0033555(multicellular organismal response to stress);GO:0002076(osteoblast development);GO:0016604(nuclear body);GO:0003714(transcript…	NA	OK	13.9209	34.7626	-1.32028	down	0.00125	yes
XLOC_006654	XLOC_006654	ENSBTAT00000025264	TMEM236	chr13:32475697-32514781	ENSBTAG00000018981	TMEM236	transmembrane protein 236 [Source:HGNC Symbol;Acc:HGNC:23473]	NA	NA	OK	14.7084	36.4954	-1.31108	down	0.00425	yes
XLOC_019885	XLOC_019885	ENSBTAT00000013884	ASB7	chr21:6150495-6206191	ENSBTAG00000010514	ASB7	ankyrin repeat and SOCS box containing 7 [Source:HGNC Symbol;Acc:HGNC:17182]	GO:0005515(protein binding);GO:0016567(protein ubiquitination);GO:0035556(intracellular signal transduction)	NA	OK	11.1431	27.6108	-1.30909	down	0.0054	yes
XLOC_029039	XLOC_029039	ENSBTAT00000000389	LMO4	chr3:56832932-56853231	ENSBTAG00000000305	LMO4	Bos taurus LIM domain only 4 (LMO4), mRNA. [Source:RefSeq mRNA;Acc:NM_001034751]	GO:0006351(transcription, DNA-templated);GO:0046872(metal ion binding);GO:0008270(zinc ion binding);GO:0006355(regulation of transcription, DNA-templated);GO:0050865(regulation of cell activation);GO:0042659(regulation of cell fate specification);GO:0021514(ventral spinal cord interneuron differentiation);GO:0031333(negative regulation of protein complex assembly);GO:0001158(enhancer sequence-spe…	NA	OK	22.8725	56.6135	-1.30753	down	0.0028	yes
XLOC_037418	XLOC_037418	ENSBTAT00000047258	VLDLR	chr8:42109678-42141155	ENSBTAG00000018517	VLDLR	Bos taurus very low density lipoprotein receptor (VLDLR), mRNA. [Source:RefSeq mRNA;Acc:NM_174489]	GO:0005515(protein binding);GO:0016021(integral component of membrane);GO:0005509(calcium ion binding);GO:0038026(reelin-mediated signaling pathway);GO:0038025(reelin receptor activity);GO:1900006(positive regulation of dendrite development);GO:0045860(positive regulation of protein kinase activity);GO:0021517(ventral spinal cord development);GO:0000122(negative regulation of transcription from R…	NA	OK	31.1929	76.9848	-1.30336	down	0.00135	yes
XLOC_007279	XLOC_007279	ENSBTAT00000013221	FAM107B	chr13:29499891-29578090	ENSBTAG00000010023	FAM107B	family with sequence similarity 107, member B [Source:HGNC Symbol;Acc:HGNC:23726]	GO:0007605(sensory perception of sound)	NA	OK	21.2099	52.1926	-1.29911	down	0.0034	yes
XLOC_006140	XLOC_006140	ENSBTAT00000015468	SLC25A15	chr12:21798803-21831677	ENSBTAG00000011647	SLC25A15	Bos taurus solute carrier family 25 (mitochondrial carrier; ornithine transporter) member 15 (SLC25A15), mRNA. [Source:RefSeq mRNA;Acc:NM_001046326]	GO:0006810(transport);GO:0016021(integral component of membrane);GO:0005743(mitochondrial inner membrane);GO:0005739(mitochondrion);GO:0016020(membrane)	NA	OK	41.2877	101.06	-1.29143	down	0.00215	yes
XLOC_030466	XLOC_030466	ENSBTAT00000013950	IFRD1	chr4:55872975-55896662	ENSBTAG00000010549	IFRD1	interferon-related developmental regulator 1 [Source:HGNC Symbol;Acc:HGNC:5456]	GO:0007527(adult somatic muscle development);GO:0042692(muscle cell differentiation);GO:0005634(nucleus);GO:0005488(binding)	NA	OK	22.0688	54.0118	-1.29127	down	0.00225	yes
XLOC_001063	XLOC_001063	ENSBTAT00000015764	CHAF1B	chr1:150360750-150386599	ENSBTAG00000011880	CHAF1B	Bos taurus chromatin assembly factor 1, subunit B (p60) (CHAF1B), mRNA. [Source:RefSeq mRNA;Acc:NM_001098014]	GO:0005515(protein binding);GO:0033186(CAF-1 complex);GO:0031497(chromatin assembly);GO:0006335(DNA replication-dependent nucleosome assembly);GO:0000790(nuclear chromatin);GO:0043234(protein complex);GO:0005654(nucleoplasm);GO:0005829(cytosol)	NA	OK	10.3179	25.2513	-1.29121	down	0.00325	yes
XLOC_032758	XLOC_032758	-	-	chr5:84092363-84093737	ENSBTAG00000040118	-	Uncharacterized protein [Source:UniProtKB/TrEMBL;Acc:E1BMY6]	GO:0045095(keratin filament);GO:0005882(intermediate filament)	NA	OK	4.90715	11.7833	-1.26378	down	0.0202	yes
XLOC_001468	XLOC_001468	ENSBTAT00000023192	KLHL24	chr1:84062594-84095789	ENSBTAG00000017450	KLHL24	kelch-like family member 24 [Source:HGNC Symbol;Acc:HGNC:25947]	GO:0005515(protein binding)	NA	OK	4.83801	11.5737	-1.25837	down	0.0061	yes
XLOC_033103	XLOC_033103	ENSBTAT00000020331	BAIAP2L2	chr5:110373373-110403013	ENSBTAG00000015290	BAIAP2L2	Brain-specific angiogenesis inhibitor 1-associated protein 2-like protein 2 [Source:UniProtKB/Swiss-Prot;Acc:E1BFE9]	GO:0032956(regulation of actin cytoskeleton organization);GO:0005515(protein binding);GO:0008093(cytoskeletal adaptor activity);GO:0017124(SH3 domain binding);GO:0008289(lipid binding);GO:0030054(cell junction);GO:0007165(signal transduction);GO:0030659(cytoplasmic vesicle membrane);GO:0031410(cytoplasmic vesicle);GO:0005886(plasma membrane);GO:0005543(phospholipid binding);GO:0061024(membrane or…	NA	OK	4.37406	10.4182	-1.25206	down	0.0121	yes
XLOC_013443	XLOC_013443	ENSBTAT00000006244;ENSBTAT00000065855;ENSBTAT00000063872	LTBP4	chr18:50173223-50202361	ENSBTAG00000004757	LTBP4	latent transforming growth factor beta binding protein 4 [Source:HGNC Symbol;Acc:HGNC:6717]	GO:0005515(protein binding);GO:0005509(calcium ion binding);GO:0046879(hormone secretion);GO:0007179(transforming growth factor beta receptor signaling pathway);GO:0050431(transforming growth factor beta binding);GO:0030162(regulation of proteolysis);GO:0070062(extracellular vesicular exosome);GO:0031012(extracellular matrix);GO:0005578(proteinaceous extracellular matrix);GO:0005615(extracellular…	NA	OK	5.16232	12.2232	-1.24353	down	0.0039	yes
XLOC_031869	XLOC_031869	ENSBTAT00000023213	ATF4	chr5:111462844-111464936	ENSBTAG00000017462	ATF4	Bos taurus activating transcription factor 4 (tax-responsive enhancer element B67) (ATF4), mRNA. [Source:RefSeq mRNA;Acc:NM_001034342]	GO:0043565(sequence-specific DNA binding);GO:0003700(sequence-specific DNA binding transcription factor activity);GO:0006355(regulation of transcription, DNA-templated);GO:1990440(positive regulation of transcription from RNA polymerase II promoter in response to endoplasmic reticulum stress);GO:0001046(core promoter sequence-specific DNA binding);GO:0032922(circadian regulation of gene expressio…	04010(MAPK signaling pathway);04720(Long-term potentiation);04722(Neurotrophin signaling pathway);04912(GnRH signaling pathway);05215(Prostate cancer)	OK	184.838	436.895	-1.24103	down	0.00195	yes
XLOC_017133	XLOC_017133	ENSBTAT00000038369	TUBA1D	chr2:107936112-107942525	ENSBTAG00000030973	TUBA1D	Bos taurus tubulin, alpha 3d (TUBA1D), mRNA. [Source:RefSeq mRNA;Acc:NM_001046410]	GO:0051258(protein polymerization);GO:0007017(microtubule-based process);GO:0003924(GTPase activity);GO:0006184(GTP catabolic process);GO:0005525(GTP binding);GO:0043234(protein complex);GO:0005874(microtubule);GO:0005856(cytoskeleton);GO:0005737(cytoplasm);GO:0000166(nucleotide binding);GO:0005200(structural constituent of cytoskeleton)	04145(Phagosome);04540(Gap junction)	OK	8.93067	21.0527	-1.23717	down	0.00685	yes
XLOC_038904	XLOC_038904	ENSBTAT00000061538	RPS6KA2	chr9:102916836-103074205	ENSBTAG00000021741	RPS6KA2	ribosomal protein S6 kinase, 90kDa, polypeptide 2 [Source:HGNC Symbol;Acc:HGNC:10431]	GO:0009103(lipopolysaccharide biosynthetic process);GO:0016773(phosphotransferase activity, alcohol group as acceptor);GO:0000287(magnesium ion binding);GO:0004713(protein tyrosine kinase activity);GO:0016772(transferase activity, transferring phosphorus-containing groups);GO:0006468(protein phosphorylation);GO:0004674(protein serine/threonine kinase activity);GO:0004672(protein kinase activity);…	04010(MAPK signaling pathway);04114(Oocyte meiosis);04150(mTOR signaling pathway);04720(Long-term potentiation);04722(Neurotrophin signaling pathway);04914(Progesterone-mediated oocyte maturation)	OK	15.9575	37.5072	-1.23294	down	0.00235	yes
XLOC_000859	XLOC_000859	ENSBTAT00000006854	C3orf33	chr1:112777461-112808491	ENSBTAG00000005203	C3orf33	chromosome 3 open reading frame 33 [Source:HGNC Symbol;Acc:HGNC:26434]	GO:0016788(hydrolase activity, acting on ester bonds);GO:0008152(metabolic process);GO:0003676(nucleic acid binding);GO:0070373(negative regulation of ERK1 and ERK2 cascade);GO:0051090(regulation of sequence-specific DNA binding transcription factor activity);GO:0005615(extracellular space)	NA	OK	4.37114	10.184	-1.22022	down	0.0478	yes
XLOC_002777	XLOC_002777	ENSBTAT00000007751	FNTB	chr10:77421463-77502096	ENSBTAG00000005897	FNTB	Bos taurus farnesyltransferase, CAAX box, beta (FNTB), mRNA. [Source:RefSeq mRNA;Acc:NM_175805]	GO:0042127(regulation of cell proliferation);GO:0004659(prenyltransferase activity);GO:0016740(transferase activity);GO:0046872(metal ion binding);GO:0003824(catalytic activity);GO:0008270(zinc ion binding);GO:0004311(farnesyltranstransferase activity);GO:0048146(positive regulation of fibroblast proliferation);GO:0042060(wound healing);GO:0008284(positive regulation of cell proliferation);GO:000…	NA	OK	10.4607	24.3559	-1.21929	down	0.0055	yes
XLOC_002099	XLOC_002099	ENSBTAT00000036544	PTPLAD1	chr10:12383301-12413275	ENSBTAG00000015155	PTPLAD1	Bos taurus protein tyrosine phosphatase-like A domain containing 1 (PTPLAD1), mRNA. [Source:RefSeq mRNA;Acc:NM_001103316]	GO:0006633(fatty acid biosynthetic process);GO:0006631(fatty acid metabolic process);GO:0005789(endoplasmic reticulum membrane);GO:0006629(lipid metabolic process);GO:0005783(endoplasmic reticulum);GO:0016829(lyase activity);GO:0016021(integral component of membrane);GO:0007254(JNK cascade);GO:0007249(I-kappaB kinase/NF-kappaB signaling);GO:0007266(Rho protein signal transduction);GO:0005515(prot…	NA	OK	57.5318	133.757	-1.21719	down	0.0016	yes
XLOC_031129	XLOC_031129	ENSBTAT00000014749	SLC38A2	chr5:34028552-34042996	ENSBTAG00000011105	SLC38A2	Bos taurus solute carrier family 38, member 2 (SLC38A2), mRNA. [Source:RefSeq mRNA;Acc:NM_001082424]	GO:0006814(sodium ion transport);GO:0006865(amino acid transport);GO:0006811(ion transport);GO:0015293(symporter activity);GO:0006810(transport);GO:0005886(plasma membrane);GO:0016021(integral component of membrane);GO:0015171(amino acid transmembrane transporter activity);GO:0003333(amino acid transmembrane transport);GO:0016020(membrane)	NA	OK	84.4346	194.771	-1.20587	down	0.0036	yes
XLOC_016844	XLOC_016844	ENSBTAT00000045869	RND3	chr2:45800465-45822011	ENSBTAG00000039731	RND3	Bos taurus Rho family GTPase 3 (RND3), mRNA. [Source:RefSeq mRNA;Acc:NM_001191158]	GO:0006184(GTP catabolic process);GO:0007264(small GTPase mediated signal transduction);GO:0005525(GTP binding);GO:0007165(signal transduction);GO:0005622(intracellular);GO:0015031(protein transport);GO:0000166(nucleotide binding);GO:0005515(protein binding);GO:0016020(membrane);GO:0070062(extracellular vesicular exosome);GO:0005925(focal adhesion)	NA	OK	19.7743	45.5753	-1.20463	down	0.0027	yes
XLOC_010176	XLOC_010176	ENSBTAT00000002578	HSPC321	chr15:43509669-43585976	ENSBTAG00000001987	HSPC321	Bos taurus SWAP switching B-cell complex 70kDa subunit (SWAP70), mRNA. [Source:RefSeq mRNA;Acc:NM_001080297]	GO:0016444(somatic cell DNA recombination);GO:0045190(isotype switching);GO:0003677(DNA binding);GO:0005515(protein binding);GO:0005524(ATP binding);GO:0005634(nucleus)	NA	OK	32.561	74.509	-1.19427	down	0.00255	yes
XLOC_001234	XLOC_001234	ENSBTAT00000017358;ENSBTAT00000062945	CBLB	chr1:50659199-50881601	ENSBTAG00000013057	CBLB	Cbl proto-oncogene B, E3 ubiquitin protein ligase [Source:HGNC Symbol;Acc:HGNC:1542]	GO:0023051(regulation of signaling);GO:0001784(phosphotyrosine binding);GO:0005515(protein binding);GO:0007166(cell surface receptor signaling pathway);GO:0004842(ubiquitin-protein transferase activity);GO:0004871(signal transducer activity);GO:0016567(protein ubiquitination);GO:0046872(metal ion binding);GO:0005509(calcium ion binding);GO:0008270(zinc ion binding);GO:0005634(nucleus);GO:0046642(…	04012(ErbB signaling pathway);04120(Ubiquitin mediated proteolysis);04144(Endocytosis);04630(Jak-STAT signaling pathway);04660(T cell receptor signaling pathway);04910(Insulin signaling pathway);05100(Bacterial invasion of epithelial cells);05200(Pathways in cancer);05220(Chronic myeloid leukemia)	OK	8.59247	19.5662	-1.18722	down	0.00525	yes
XLOC_004048	XLOC_004048	ENSBTAT00000001371	IL18R1	chr11:7145471-7179767	ENSBTAG00000001034	IL18R1	interleukin 18 receptor 1 [Source:HGNC Symbol;Acc:HGNC:5988]	GO:0005515(protein binding);GO:0007165(signal transduction);GO:0042008(interleukin-18 receptor activity);GO:0035655(interleukin-18-mediated signaling pathway);GO:0045063(T-helper 1 cell differentiation);GO:0042346(positive regulation of NF-kappaB import into nucleus);GO:0030101(natural killer cell activation);GO:0032729(positive regulation of interferon-gamma production);GO:0004908(interleukin-1 …	04060(Cytokine-cytokine receptor interaction)	OK	4.60288	10.4713	-1.18584	down	0.0136	yes
XLOC_039249	XLOC_039249	ENSBTAT00000066170	TSC22D3	chrX:59707291-59772737	ENSBTAG00000045877	TSC22D3	TSC22 domain family protein 3 [Source:RefSeq peptide;Acc:NP_001096812]	GO:0003700(sequence-specific DNA binding transcription factor activity);GO:0006355(regulation of transcription, DNA-templated);GO:0070236(negative regulation of activation-induced cell death of T cells);GO:0048642(negative regulation of skeletal muscle tissue development);GO:0043426(MRF binding);GO:0006970(response to osmotic stress);GO:0000122(negative regulation of transcription from RNA polyme…	NA	OK	12.3154	27.9346	-1.18158	down	0.03115	yes
XLOC_018867	XLOC_018867	-	-	chr20:26109750-26111882	ENSBTAG00000040118	-	Uncharacterized protein [Source:UniProtKB/TrEMBL;Acc:E1BMY6]	GO:0045095(keratin filament);GO:0005882(intermediate filament)	NA	OK	27.9629	63.4126	-1.18125	down	0.0038	yes
XLOC_001211	XLOC_001211	ENSBTAT00000018161	FILIP1L	chr1:43730027-44124501	ENSBTAG00000013664	FILIP1L	filamin A interacting protein 1-like [Source:HGNC Symbol;Acc:HGNC:24589]	NA	NA	OK	49.1852	111.075	-1.17523	down	0.0041	yes
XLOC_026379	XLOC_026379	ENSBTAT00000003794	GAB4	chr29:17812034-17888783	ENSBTAG00000002922	GAB4	GRB2-associated binding protein family, member 4 [Source:HGNC Symbol;Acc:HGNC:18325]	GO:0016477(cell migration);GO:0007229(integrin-mediated signaling pathway)	NA	OK	13.1363	29.6364	-1.17381	down	0.0072	yes
XLOC_002964	XLOC_002964	ENSBTAT00000012436	JDP2	chr10:87006442-87051824	ENSBTAG00000009451	JDP2	Jun dimerization protein 2 [Source:HGNC Symbol;Acc:HGNC:17546]	GO:0043565(sequence-specific DNA binding);GO:0003700(sequence-specific DNA binding transcription factor activity);GO:0003677(DNA binding);GO:0006355(regulation of transcription, DNA-templated);GO:0005634(nucleus);GO:0031065(positive regulation of histone deacetylation);GO:0045599(negative regulation of fat cell differentiation);GO:0000122(negative regulation of transcription from RNA polymerase I…	NA	OK	15.8567	35.614	-1.16735	down	0.0079	yes
XLOC_017952	XLOC_017952	ENSBTAT00000011485	SERPINE2	chr2:112870140-112940179	ENSBTAG00000008717	SERPINE2	serpin peptidase inhibitor, clade E (nexin, plasminogen activator inhibitor type 1), member 2 [Source:HGNC Symbol;Acc:HGNC:8951]	GO:0005615(extracellular space);GO:0061108(seminal vesicle epithelium development);GO:0050974(detection of mechanical stimulus involved in sensory perception);GO:0021683(cerebellar granular layer morphogenesis);GO:0033363(secretory granule organization);GO:0010757(negative regulation of plasminogen activation);GO:0010544(negative regulation of platelet activation);GO:0032940(secretion by cell);GO…	NA	OK	34.6338	77.3284	-1.15882	down	0.0041	yes
XLOC_030618	XLOC_030618	-	-	chr4:92394717-92395239	ENSBTAG00000040118	-	Uncharacterized protein [Source:UniProtKB/TrEMBL;Acc:E1BMY6]	GO:0045095(keratin filament);GO:0005882(intermediate filament)	NA	OK	21.592	47.9716	-1.15168	down	0.03125	yes
XLOC_007277	XLOC_007277	ENSBTAT00000027718	BEND7	chr13:28422013-28477668	ENSBTAG00000020800	BEND7	BEN domain containing 7 [Source:HGNC Symbol;Acc:HGNC:23514]	GO:0070062(extracellular vesicular exosome);GO:0005515(protein binding)	NA	OK	6.31939	13.9689	-1.14437	down	0.01005	yes
XLOC_029795	XLOC_029795	ENSBTAT00000033700	NT5C3	chr4:64128127-64205027	ENSBTAG00000016709	NT5C3	Bos taurus 5'-nucleotidase, cytosolic III (NT5C3), mRNA. [Source:RefSeq mRNA;Acc:NM_001037597]	GO:0008253(5'-nucleotidase activity);GO:0000287(magnesium ion binding);GO:0005737(cytoplasm);GO:0016311(dephosphorylation);GO:0005739(mitochondrion);GO:0005783(endoplasmic reticulum)	00230(Purine metabolism);00240(Pyrimidine metabolism);00760(Nicotinate and nicotinamide metabolism)	OK	8.53645	18.831	-1.1414	down	0.0277	yes
XLOC_037701	XLOC_037701	ENSBTAT00000012912	GKAP1	chr8:78327712-78419196	ENSBTAG00000023523	GKAP1	Bos taurus G kinase anchoring protein 1 (GKAP1), mRNA. [Source:RefSeq mRNA;Acc:NM_001040573]	GO:0007165(signal transduction);GO:0005794(Golgi apparatus);GO:0005515(protein binding)	NA	OK	7.0072	15.456	-1.14125	down	0.0165	yes
XLOC_029117	XLOC_029117	ENSBTAT00000033450	GADD45A	chr3:77972152-77975394	ENSBTAG00000013860	GADD45A	Bos taurus growth arrest and DNA-damage-inducible, alpha (GADD45A), mRNA. [Source:RefSeq mRNA;Acc:NM_001034247]	GO:0007050(cell cycle arrest);GO:0006950(response to stress);GO:0051726(regulation of cell cycle);GO:0006974(cellular response to DNA damage stimulus);GO:0007049(cell cycle);GO:0005634(nucleus);GO:0007098(centrosome cycle);GO:0001047(core promoter binding);GO:0006469(negative regulation of protein kinase activity);GO:0005515(protein binding);GO:0042770(signal transduction in response to DNA damag…	04010(MAPK signaling pathway);04110(Cell cycle);04115(p53 signaling pathway)	OK	67.3596	148.229	-1.13788	down	0.00435	yes
XLOC_009828	XLOC_009828	ENSBTAT00000017032	STX3	chr15:84312681-84344566	ENSBTAG00000012820	STX3	Bos taurus syntaxin 3 (STX3), mRNA. [Source:RefSeq mRNA;Acc:NM_001101971]	GO:0005515(protein binding);GO:0005484(SNAP receptor activity);GO:0006886(intracellular protein transport);GO:0016192(vesicle-mediated transport);GO:0060291(long-term synaptic potentiation);GO:0030141(secretory granule);GO:0016324(apical plasma membrane);GO:0006887(exocytosis);GO:0030425(dendrite);GO:0016020(membrane);GO:1903078(positive regulation of protein localization to plasma membrane);GO:2…	04130(SNARE interactions in vesicular transport)	OK	11.0016	24.2	-1.13729	down	0.00795	yes
XLOC_035422	XLOC_035422	ENSBTAT00000000317	RUFY1	chr7:1602941-1671781	ENSBTAG00000019868	RUFY1	RUN and FYVE domain containing 1 [Source:HGNC Symbol;Acc:HGNC:19760]	GO:0008565(protein transporter activity);GO:0015031(protein transport);GO:0030100(regulation of endocytosis);GO:0005515(protein binding);GO:0005737(cytoplasm);GO:0043231(intracellular membrane-bounded organelle);GO:0005634(nucleus)	NA	OK	5.64207	12.3865	-1.13448	down	0.01095	yes
XLOC_030506	XLOC_030506	ENSBTAT00000025254	GARS	chr4:66102955-66156434	ENSBTAG00000018972	GARS	Bos taurus glycyl-tRNA synthetase (GARS), mRNA. [Source:RefSeq mRNA;Acc:NM_001097566]	GO:0006426(glycyl-tRNA aminoacylation);GO:0004820(glycine-tRNA ligase activity);GO:0006418(tRNA aminoacylation for protein translation);GO:0004812(aminoacyl-tRNA ligase activity);GO:0005737(cytoplasm);GO:0005524(ATP binding);GO:0000166(nucleotide binding);GO:0030141(secretory granule);GO:0005739(mitochondrion);GO:0005515(protein binding);GO:0015966(diadenosine tetraphosphate biosynthetic process)…	00970(Aminoacyl-tRNA biosynthesis)	OK	159.966	350.825	-1.13299	down	0.00535	yes
XLOC_029889	XLOC_029889	ENSBTAT00000053426	IGFBP3	chr4:76705104-76712709	ENSBTAG00000003994	IGFBP3	Bos taurus insulin-like growth factor binding protein 3 (IGFBP3), mRNA. [Source:RefSeq mRNA;Acc:NM_174556]	GO:0019838(growth factor binding);GO:0043065(positive regulation of apoptotic process);GO:0005520(insulin-like growth factor binding);GO:0001558(regulation of cell growth);GO:0043085(positive regulation of catalytic activity);GO:0001968(fibronectin binding);GO:0044342(type B pancreatic cell proliferation);GO:0040008(regulation of growth);GO:0001649(osteoblast differentiation);GO:0043568(positive …	04115(p53 signaling pathway)	OK	34.5533	75.7317	-1.13207	down	0.0067	yes
XLOC_026069	XLOC_026069	ENSBTAT00000063370	IRF2BP2	chr28:7444900-7446967	ENSBTAG00000046841	IRF2BP2	interferon regulatory factor 2 binding protein 2 [Source:HGNC Symbol;Acc:HGNC:21729]	GO:0005654(nucleoplasm);GO:0005634(nucleus)	NA	OK	61.5554	134.865	-1.13156	down	0.00695	yes
XLOC_036042	XLOC_036042	-	-	chr7:51502538-51503193	ENSBTAG00000040118	-	Uncharacterized protein [Source:UniProtKB/TrEMBL;Acc:E1BMY6]	GO:0045095(keratin filament);GO:0005882(intermediate filament)	NA	OK	14.6695	32.113	-1.13034	down	0.03145	yes
XLOC_008827	XLOC_008827	ENSBTAT00000037192	ESRP1	chr14:71944917-72003348	ENSBTAG00000021838	ESRP1	epithelial splicing regulatory protein 1 [Source:HGNC Symbol;Acc:HGNC:25966]	GO:0003676(nucleic acid binding);GO:0000166(nucleotide binding);GO:0003729(mRNA binding);GO:0043484(regulation of RNA splicing);GO:0005634(nucleus)	NA	OK	28.8451	63.0972	-1.12925	down	0.0037	yes
XLOC_003998	XLOC_003998	ENSBTAT00000006322	INPP4A	chr11:3684899-3739057	ENSBTAG00000004814	INPP4A	inositol polyphosphate-4-phosphatase, type I, 107kDa [Source:HGNC Symbol;Acc:HGNC:6074]	GO:0005515(protein binding)	00562(Inositol phosphate metabolism);04070(Phosphatidylinositol signaling system)	OK	10.9105	23.8421	-1.12779	down	0.00845	yes
XLOC_031419	XLOC_031419	ENSBTAT00000038204	RNF41	chr5:57416304-57454863	ENSBTAG00000026754	RNF41	E3 ubiquitin-protein ligase NRDP1 [Source:RefSeq peptide;Acc:NP_001039990]	GO:0005515(protein binding);GO:0016881(acid-amino acid ligase activity);GO:0004842(ubiquitin-protein transferase activity);GO:0016567(protein ubiquitination);GO:0046872(metal ion binding);GO:0008270(zinc ion binding);GO:0005135(interleukin-3 receptor binding);GO:0045619(regulation of lymphocyte differentiation);GO:0005128(erythropoietin receptor binding);GO:2000114(regulation of establishment of …	NA	OK	26.8859	58.2856	-1.11629	down	0.02475	yes
XLOC_012857	XLOC_012857	ENSBTAT00000014109	PIK3IP1	chr17:72198072-72208795	ENSBTAG00000010667	PIK3IP1	Bos taurus phosphoinositide-3-kinase interacting protein 1 (PIK3IP1), mRNA. [Source:RefSeq mRNA;Acc:NM_001075552]	GO:0005886(plasma membrane);GO:0016021(integral component of membrane);GO:0043553(negative regulation of phosphatidylinositol 3-kinase activity);GO:0014067(negative regulation of phosphatidylinositol 3-kinase signaling);GO:0016020(membrane);GO:0036313(phosphatidylinositol 3-kinase catalytic subunit binding);GO:0070062(extracellular vesicular exosome)	NA	OK	6.06352	13.108	-1.11222	down	0.0188	yes
XLOC_025247	XLOC_025247	-	-	chr27:14862626-14877380	ENSBTAG00000040118	-	Uncharacterized protein [Source:UniProtKB/TrEMBL;Acc:E1BMY6]	GO:0045095(keratin filament);GO:0005882(intermediate filament)	NA	OK	118.89	256.429	-1.10894	down	0.0165	yes
XLOC_004198	XLOC_004198	ENSBTAT00000004836	EPAS1	chr11:28576346-28668903	ENSBTAG00000003711	EPAS1	Bos taurus endothelial PAS domain protein 1 (EPAS1), mRNA. [Source:RefSeq mRNA;Acc:NM_174725]	GO:0005515(protein binding);GO:0005667(transcription factor complex);GO:0046983(protein dimerization activity);GO:0007165(signal transduction);GO:0004871(signal transducer activity);GO:0006351(transcription, DNA-templated);GO:0003700(sequence-specific DNA binding transcription factor activity);GO:0003677(DNA binding);GO:0006355(regulation of transcription, DNA-templated);GO:0005634(nucleus);GO:00…	05200(Pathways in cancer);05211(Renal cell carcinoma)	OK	10.739	23.1238	-1.10652	down	0.00645	yes
XLOC_038693	XLOC_038693	ENSBTAT00000020443;ENSBTAT00000046411	ARHGAP18	chr9:68712247-68845226	ENSBTAG00000015381	ARHGAP18	Bos taurus Rho GTPase activating protein 18 (ARHGAP18), mRNA. [Source:RefSeq mRNA;Acc:NM_001110772]	GO:0007165(signal transduction);GO:0005622(intracellular)	NA	OK	14.618	31.4661	-1.10605	down	0.0095	yes
XLOC_018868	XLOC_018868	-	-	chr20:26112205-26112914	ENSBTAG00000040118	-	Uncharacterized protein [Source:UniProtKB/TrEMBL;Acc:E1BMY6]	GO:0045095(keratin filament);GO:0005882(intermediate filament)	NA	OK	40.761	86.8616	-1.09153	down	0.01165	yes
XLOC_007957	XLOC_007957	-	-	chr14:17955468-17957044	ENSBTAG00000040118	-	Uncharacterized protein [Source:UniProtKB/TrEMBL;Acc:E1BMY6]	GO:0045095(keratin filament);GO:0005882(intermediate filament)	NA	OK	5.53187	11.78	-1.0905	down	0.037	yes
XLOC_032107	XLOC_032107	-	-	chr5:22801672-22802288	ENSBTAG00000040118	-	Uncharacterized protein [Source:UniProtKB/TrEMBL;Acc:E1BMY6]	GO:0045095(keratin filament);GO:0005882(intermediate filament)	NA	OK	14.2123	30.2496	-1.08978	down	0.04415	yes
XLOC_018870	XLOC_018870	ENSBTAT00000034583	ITGA1	chr20:26115417-26227619	ENSBTAG00000016525	ITGA1	integrin, alpha 1 [Source:HGNC Symbol;Acc:HGNC:6134]	GO:0008305(integrin complex);GO:0007229(integrin-mediated signaling pathway);GO:0007155(cell adhesion);GO:0016021(integral component of membrane);GO:0042059(negative regulation of epidermal growth factor receptor signaling pathway);GO:0045178(basal part of cell);GO:0045123(cellular extravasation);GO:0030593(neutrophil chemotaxis);GO:0009986(cell surface);GO:0009897(external side of plasma membran…	NA	OK	49.111	104.51	-1.08953	down	0.0067	yes
XLOC_022474	XLOC_022474	ENSBTAT00000020219	NPC1	chr24:33438418-33507301	ENSBTAG00000015195	NPC1	Bos taurus Niemann-Pick disease, type C1 (NPC1), mRNA. [Source:RefSeq mRNA;Acc:NM_174758]	GO:0007165(signal transduction);GO:0016021(integral component of membrane);GO:0071404(cellular response to low-density lipoprotein particle stimulus);GO:0033344(cholesterol efflux);GO:0071383(cellular response to steroid hormone stimulus);GO:0016242(negative regulation of macroautophagy);GO:0006897(endocytosis);GO:0006486(protein glycosylation);GO:0005764(lysosome);GO:0045121(membrane raft);GO:00…	04142(Lysosome)	OK	34.1279	72.5927	-1.08887	down	0.01695	yes
XLOC_009536	XLOC_009536	ENSBTAT00000044657	ARL14EP	chr15:61833888-61847775	ENSBTAG00000012417	ARL14EP	Bos taurus chromosome 15 open reading frame, human C11orf46 (ARL14EP), mRNA. [Source:RefSeq mRNA;Acc:NM_001031761]	GO:0005737(cytoplasm);GO:0005515(protein binding)	NA	OK	18.4667	39.178	-1.08512	down	0.01145	yes
XLOC_016362	XLOC_016362	ENSBTAT00000066075;ENSBTAT00000034753	KANSL1	chr19:46649373-46775925	ENSBTAG00000012564	KANSL1	KAT8 regulatory NSL complex subunit 1 [Source:HGNC Symbol;Acc:HGNC:24565]	GO:0046972(histone acetyltransferase activity (H4-K16 specific));GO:0043996(histone acetyltransferase activity (H4-K8 specific));GO:0043995(histone acetyltransferase activity (H4-K5 specific));GO:0043982(histone H4-K8 acetylation);GO:0043981(histone H4-K5 acetylation);GO:0071339(MLL1 complex);GO:0043984(histone H4-K16 acetylation);GO:0005515(protein binding);GO:0000123(histone acetyltransferase c…	NA	OK	16.223	34.4073	-1.08467	down	0.00615	yes
XLOC_003802	XLOC_003802	ENSBTAT00000014664;ENSBTAT00000064501	ZFYVE1	chr10:84869481-84914784	ENSBTAG00000011041	ZFYVE1	zinc finger, FYVE domain containing 1 [Source:HGNC Symbol;Acc:HGNC:13180]	GO:0046872(metal ion binding);GO:0097629(extrinsic component of omegasome membrane);GO:0005776(autophagic vacuole);GO:0044233(ER-mitochondrion membrane contact site);GO:0005795(Golgi stack);GO:0005545(1-phosphatidylinositol binding);GO:0043325(phosphatidylinositol-3,4-bisphosphate binding);GO:0005547(phosphatidylinositol-3,4,5-trisphosphate binding);GO:0010923(negative regulation of phosphatase a…	NA	OK	19.7871	41.9487	-1.08407	down	0.00795	yes
XLOC_027839	XLOC_027839	ENSBTAT00000028276	COL11A1	chr3:40448663-40682012	ENSBTAG00000021217	COL11A1	Bos taurus collagen, type XI, alpha 1 (COL11A1), mRNA. [Source:RefSeq mRNA;Acc:NM_001166509]	GO:0005201(extracellular matrix structural constituent);GO:0005581(collagen trimer);GO:0002063(chondrocyte development);GO:0006029(proteoglycan metabolic process);GO:0035989(tendon development);GO:0001502(cartilage condensation);GO:0031012(extracellular matrix);GO:0055010(ventricular cardiac muscle tissue morphogenesis);GO:0048705(skeletal system morphogenesis);GO:0048704(embryonic skeletal syste…	04510(Focal adhesion);04512(ECM-receptor interaction)	OK	35.9323	75.7255	-1.0755	down	0.006	yes
XLOC_019343	XLOC_019343	ENSBTAT00000019639;ENSBTAT00000065058	ISG20	chr21:20013718-20031094	ENSBTAG00000014762	ISG20	interferon stimulated exonuclease gene 20kDa [Source:HGNC Symbol;Acc:HGNC:6130]	GO:0004527(exonuclease activity);GO:0003676(nucleic acid binding);GO:0030620(U2 snRNA binding);GO:0008310(single-stranded DNA 3'-5' exodeoxyribonuclease activity);GO:0034511(U3 snoRNA binding);GO:0015030(Cajal body);GO:0006401(RNA catabolic process);GO:0016605(PML body);GO:0000738(DNA catabolic process, exonucleolytic);GO:0000175(3'-5'-exoribonuclease activity);GO:0045071(negative regulation of v…	NA	OK	12.2299	25.7643	-1.07496	down	0.04035	yes
XLOC_011540	XLOC_011540	ENSBTAT00000027587	CLCN6	chr16:42716410-42750151	ENSBTAG00000020700	CLCN6	chloride channel, voltage-sensitive 6 [Source:HGNC Symbol;Acc:HGNC:2024]	GO:0044070(regulation of anion transport);GO:0005247(voltage-gated chloride channel activity);GO:0034220(ion transmembrane transport);GO:0005216(ion channel activity);GO:0030554(adenyl nucleotide binding);GO:0055085(transmembrane transport);GO:0006821(chloride transport);GO:0016021(integral component of membrane);GO:0016020(membrane);GO:0005765(lysosomal membrane)	NA	OK	5.51635	11.6207	-1.07491	down	0.01655	yes
XLOC_039262	XLOC_039262	ENSBTAT00000018239	ATG4A	chrX:60973683-61051097	ENSBTAG00000013724	ATG4A	Bos taurus ATG4 autophagy related 4 homolog A (S. cerevisiae) (ATG4A), mRNA. [Source:RefSeq mRNA;Acc:NM_001001171]	GO:0006914(autophagy);GO:0008234(cysteine-type peptidase activity);GO:0008233(peptidase activity);GO:0006508(proteolysis);GO:0015031(protein transport);GO:0006810(transport);GO:0016787(hydrolase activity);GO:0005737(cytoplasm)	04140(Regulation of autophagy)	OK	5.07965	10.7002	-1.07484	down	0.0435	yes
XLOC_037629	XLOC_037629	-	-	chr8:71117956-71124317	ENSBTAG00000040118	-	Uncharacterized protein [Source:UniProtKB/TrEMBL;Acc:E1BMY6]	GO:0045095(keratin filament);GO:0005882(intermediate filament)	NA	OK	12.6298	26.5558	-1.07219	down	0.02895	yes
XLOC_018869	XLOC_018869	-	-	chr20:26113187-26113730	ENSBTAG00000040118	-	Uncharacterized protein [Source:UniProtKB/TrEMBL;Acc:E1BMY6]	GO:0045095(keratin filament);GO:0005882(intermediate filament)	NA	OK	18.2705	38.4109	-1.072	down	0.04665	yes
XLOC_026606	XLOC_026606	-	-	chr29:44278764-44284096	ENSBTAG00000040118	-	Uncharacterized protein [Source:UniProtKB/TrEMBL;Acc:E1BMY6]	GO:0045095(keratin filament);GO:0005882(intermediate filament)	NA	OK	127.077	266.832	-1.07023	down	0.0092	yes
XLOC_040023	XLOC_040023	ENSBTAT00000018226	PSMD10	chrX:60965545-60973526	ENSBTAG00000013721	PSMD10	Bos taurus proteasome (prosome, macropain) 26S subunit, non-ATPase, 10 (PSMD10), mRNA. [Source:RefSeq mRNA;Acc:NM_001046406]	GO:0005515(protein binding);GO:0000502(proteasome complex);GO:0045737(positive regulation of cyclin-dependent protein serine/threonine kinase activity);GO:0007253(cytoplasmic sequestering of NF-kappaB);GO:0090201(negative regulation of release of cytochrome c from mitochondria);GO:0043518(negative regulation of DNA damage response, signal transduction by p53 class mediator);GO:0043409(negative re…	NA	OK	16.9946	35.597	-1.06668	down	0.02065	yes
XLOC_003422	XLOC_003422	ENSBTAT00000046291	SCG5	chr10:30077157-30135194	ENSBTAG00000032613	SCG5	Bos taurus secretogranin V (7B2 protein) (SCG5), mRNA. [Source:RefSeq mRNA;Acc:NM_001045998]	GO:0030141(secretory granule);GO:0007218(neuropeptide signaling pathway);GO:0046883(regulation of hormone secretion);GO:0016486(peptide hormone processing);GO:0043086(negative regulation of catalytic activity);GO:0004857(enzyme inhibitor activity);GO:0006886(intracellular protein transport);GO:0005515(protein binding);GO:0051082(unfolded protein binding)	NA	OK	10.7214	22.4012	-1.06308	down	0.03995	yes
XLOC_013133	XLOC_013133	ENSBTAT00000022472	HERPUD1	chr18:25048222-25059578	ENSBTAG00000016896	HERPUD1	Bos taurus homocysteine-inducible, endoplasmic reticulum stress-inducible, ubiquitin-like domain member 1 (HERPUD1), mRNA. [Source:RefSeq mRNA;Acc:NM_001102265]	GO:0005515(protein binding);GO:0031396(regulation of protein ubiquitination);GO:0030968(endoplasmic reticulum unfolded protein response);GO:0032092(positive regulation of protein binding);GO:0005789(endoplasmic reticulum membrane);GO:0006511(ubiquitin-dependent protein catabolic process);GO:0016021(integral component of membrane);GO:1903071(positive regulation of ER-associated ubiquitin-dependent…	NA	OK	34.7217	72.3734	-1.05962	down	0.0108	yes
XLOC_029460	XLOC_029460	ENSBTAT00000022720	GRB10	chr4:5104898-5245263	ENSBTAG00000017086	GRB10	Bos taurus growth factor receptor-bound protein 10 (GRB10), mRNA. [Source:RefSeq mRNA;Acc:NM_001192586]	GO:0007165(signal transduction);GO:0046325(negative regulation of glucose import);GO:0005158(insulin receptor binding);GO:0042326(negative regulation of phosphorylation);GO:0048009(insulin-like growth factor receptor signaling pathway);GO:0030178(negative regulation of Wnt signaling pathway);GO:0046627(negative regulation of insulin receptor signaling pathway);GO:0005070(SH3/SH2 adaptor activity)…	NA	OK	13.1453	27.3962	-1.05943	down	0.0088	yes
XLOC_036049	XLOC_036049	ENSBTAT00000010823	SLC23A1	chr7:52271991-52284986	ENSBTAG00000010798	SLC23A1	solute carrier family 23 (ascorbic acid transporter), member 1 [Source:HGNC Symbol;Acc:HGNC:10974]	GO:0007420(brain development);GO:0016324(apical plasma membrane);GO:0043229(intracellular organelle);GO:0006814(sodium ion transport);GO:0005215(transporter activity);GO:0055085(transmembrane transport);GO:0006810(transport);GO:0005886(plasma membrane);GO:0005737(cytoplasm);GO:0015882(L-ascorbic acid transport);GO:0015229(L-ascorbic acid transporter activity);GO:0030324(lung development);GO:00099…	NA	OK	7.82448	16.2883	-1.05777	down	0.0234	yes
XLOC_013198	XLOC_013198	ENSBTAT00000005727	NFATC3	chr18:35640459-35734469	ENSBTAG00000004368	NFATC3	nuclear factor of activated T-cells, cytoplasmic, calcineurin-dependent 3 [Source:HGNC Symbol;Acc:HGNC:7777]	GO:0005515(protein binding);GO:0003700(sequence-specific DNA binding transcription factor activity);GO:0006355(regulation of transcription, DNA-templated);GO:0005634(nucleus);GO:0055001(muscle cell development);GO:0071285(cellular response to lithium ion);GO:0051145(smooth muscle cell differentiation);GO:0045333(cellular respiration);GO:0007507(heart development);GO:0001569(patterning of blood ve…	04310(Wnt signaling pathway);04360(Axon guidance);04370(VEGF signaling pathway);04650(Natural killer cell mediated cytotoxicity);04660(T cell receptor signaling pathway);04662(B cell receptor signaling pathway)	OK	7.60052	15.7895	-1.0548	down	0.0115	yes
XLOC_036083	XLOC_036083	ENSBTAT00000010347	GNPDA1	chr7:54748004-54759289	ENSBTAG00000007865	GNPDA1	Bos taurus glucosamine-6-phosphate deaminase 1 (GNPDA1), mRNA. [Source:RefSeq mRNA;Acc:NM_001080287]	GO:0006044(N-acetylglucosamine metabolic process);GO:0004342(glucosamine-6-phosphate deaminase activity);GO:0005975(carbohydrate metabolic process);GO:0016787(hydrolase activity);GO:0005737(cytoplasm);GO:0006043(glucosamine catabolic process);GO:0006091(generation of precursor metabolites and energy);GO:0070062(extracellular vesicular exosome)	00520(Amino sugar and nucleotide sugar metabolism)	OK	22.377	46.4409	-1.05338	down	0.0119	yes
XLOC_037266	XLOC_037266	ENSBTAT00000008831	FBXO8	chr8:6410066-6449647	ENSBTAG00000006715	FBXO8	Bos taurus F-box protein 8 (FBXO8), mRNA. [Source:RefSeq mRNA;Acc:NM_001015667]	GO:0005515(protein binding);GO:0030036(actin cytoskeleton organization);GO:0005085(guanyl-nucleotide exchange factor activity);GO:0030054(cell junction);GO:0043547(positive regulation of GTPase activity);GO:0005634(nucleus);GO:0000151(ubiquitin ligase complex);GO:0006511(ubiquitin-dependent protein catabolic process);GO:0032012(regulation of ARF protein signal transduction);GO:0005086(ARF guanyl-…	NA	OK	9.09519	18.8624	-1.05234	down	0.02605	yes
XLOC_036827	XLOC_036827	ENSBTAT00000018554	PSAT1	chr8:54501517-54529786	ENSBTAG00000013960	PSAT1	Bos taurus phosphoserine aminotransferase 1 (PSAT1), mRNA. [Source:RefSeq mRNA;Acc:NM_001102150]	GO:0006564(L-serine biosynthetic process);GO:0004648(O-phospho-L-serine:2-oxoglutarate aminotransferase activity);GO:0008652(cellular amino acid biosynthetic process);GO:0030170(pyridoxal phosphate binding);GO:0016740(transferase activity);GO:0008483(transaminase activity);GO:0008152(metabolic process);GO:0003824(catalytic activity);GO:0070062(extracellular vesicular exosome);GO:0005737(cytoplasm)	00260(Glycine, serine and threonine metabolism);00750(Vitamin B6 metabolism)	OK	242.469	502.389	-1.05101	down	0.01025	yes
XLOC_031532	XLOC_031532	ENSBTAT00000013932	TOM1	chr5:73905554-73946203	ENSBTAG00000045785	TOM1	Bos taurus target of myb1 (chicken) (TOM1), mRNA. [Source:RefSeq mRNA;Acc:NM_001035015]	GO:0005622(intracellular);GO:0006886(intracellular protein transport);GO:0030276(clathrin binding);GO:0005769(early endosome);GO:0070062(extracellular vesicular exosome);GO:0005515(protein binding);GO:0005768(endosome);GO:0005829(cytosol);GO:0005737(cytoplasm);GO:0016020(membrane)	NA	OK	72.2373	149.427	-1.04863	down	0.0131	yes
XLOC_013295	XLOC_013295	ENSBTAT00000023345	CEBPG	chr18:44005706-44015338	ENSBTAG00000017560	CEBPG	Bos taurus CCAAT/enhancer binding protein (C/EBP), gamma (CEBPG), mRNA. [Source:RefSeq mRNA;Acc:NM_001034801]	GO:0043565(sequence-specific DNA binding);GO:0006351(transcription, DNA-templated);GO:0003700(sequence-specific DNA binding transcription factor activity);GO:0003677(DNA binding);GO:0006355(regulation of transcription, DNA-templated);GO:0005634(nucleus);GO:0016071(mRNA metabolic process);GO:0043353(enucleate erythrocyte differentiation);GO:0045078(positive regulation of interferon-gamma biosynthe…	NA	OK	27.9523	57.732	-1.0464	down	0.0384	yes
XLOC_013993	XLOC_013993	ENSBTAT00000021306	ANKRD11	chr18:14371107-14436428	ENSBTAG00000016006	ANKRD11	ankyrin repeat domain 11 [Source:HGNC Symbol;Acc:HGNC:21316]	GO:0005515(protein binding);GO:0060323(head morphogenesis);GO:0048705(skeletal system morphogenesis);GO:0060348(bone development);GO:0001894(tissue homeostasis);GO:0001701(in utero embryonic development);GO:0035264(multicellular organism growth);GO:0060325(face morphogenesis);GO:0005654(nucleoplasm);GO:0042475(odontogenesis of dentin-containing tooth);GO:0005886(plasma membrane);GO:0005737(cytopl…	NA	OK	16.9616	35.0259	-1.04615	down	0.00685	yes
XLOC_018324	XLOC_018324	ENSBTAT00000013179;ENSBTAT00000013177	CPEB4	chr20:5512160-5585032	ENSBTAG00000009995	CPEB4	CPEB4 protein; Uncharacterized protein [Source:UniProtKB/TrEMBL;Acc:A7Z087]	GO:0003676(nucleic acid binding);GO:0000166(nucleotide binding);GO:0002931(response to ischemia);GO:0014069(postsynaptic density);GO:0045202(synapse);GO:0030425(dendrite);GO:0005783(endoplasmic reticulum);GO:0003723(RNA binding);GO:0005515(protein binding);GO:0044822(poly(A) RNA binding)	NA	OK	7.69351	15.8426	-1.04209	down	0.02225	yes
XLOC_012213	XLOC_012213	ENSBTAT00000002459	MED13L	chr17:60900471-61150532	ENSBTAG00000001888	MED13L	Bos taurus mediator complex subunit 13-like (MED13L), mRNA. [Source:RefSeq mRNA;Acc:NM_001192468]	GO:0016592(mediator complex);GO:0001104(RNA polymerase II transcription cofactor activity);GO:0006366(transcription from RNA polymerase II promoter);GO:0006357(regulation of transcription from RNA polymerase II promoter)	NA	OK	28.6668	58.9561	-1.04026	down	0.0071	yes
XLOC_008778	XLOC_008778	ENSBTAT00000046176	SPAG1	chr14:66319196-66406176	ENSBTAG00000032544	SPAG1	sperm associated antigen 1 [Source:HGNC Symbol;Acc:HGNC:11212]	GO:0005515(protein binding);GO:0015630(microtubule cytoskeleton);GO:0005654(nucleoplasm);GO:0005737(cytoplasm)	NA	OK	14.8278	30.4888	-1.03997	down	0.0176	yes
XLOC_032103	XLOC_032103	ENSBTAT00000027091	BTG1	chr5:22086070-22088781	ENSBTAG00000020330	BTG1	Bos taurus B-cell translocation gene 1, anti-proliferative (BTG1), mRNA. [Source:RefSeq mRNA;Acc:NM_173999]	GO:0045766(positive regulation of angiogenesis);GO:0019899(enzyme binding);GO:0008285(negative regulation of cell proliferation);GO:0005634(nucleus);GO:0005737(cytoplasm);GO:0045603(positive regulation of endothelial cell differentiation);GO:0045663(positive regulation of myoblast differentiation);GO:2000271(positive regulation of fibroblast apoptotic process);GO:0005515(protein binding)	03018(RNA degradation)	OK	43.9705	90.0036	-1.03345	down	0.01305	yes
XLOC_015390	XLOC_015390	ENSBTAT00000020308;ENSBTAT00000056223	SGSH	chr19:53041243-53048384	ENSBTAG00000015267	SGSH	Bos taurus N-sulfoglucosamine sulfohydrolase (SGSH), mRNA. [Source:RefSeq mRNA;Acc:NM_001102189]	GO:0008484(sulfuric ester hydrolase activity);GO:0008152(metabolic process);GO:0003824(catalytic activity);GO:0005515(protein binding);GO:0070062(extracellular vesicular exosome)	00531(Glycosaminoglycan degradation);04142(Lysosome)	OK	11.6325	23.7884	-1.0321	down	0.01865	yes
XLOC_021441	XLOC_021441	ENSBTAT00000007026;ENSBTAT00000065013;ENSBTAT00000064760;ENSBTAT00000046700	ENSBTAG00000005339	chr23:17255537-17270952	ENSBTAG00000005339	-	Uncharacterized protein [Source:UniProtKB/TrEMBL;Acc:F1N5F6]	GO:0008201(heparin binding);GO:0008083(growth factor activity);GO:0016020(membrane)	NA	OK	23.8796	48.7795	-1.0305	down	0.0213	yes
XLOC_039506	XLOC_039506	ENSBTAT00000016923	ARHGEF9	chrX:101723257-102063219	ENSBTAG00000012729	ARHGEF9	Bos taurus Cdc42 guanine nucleotide exchange factor (GEF) 9 (ARHGEF9), mRNA. [Source:RefSeq mRNA;Acc:NM_001035418]	GO:0005515(protein binding);GO:0035023(regulation of Rho protein signal transduction);GO:0032321(positive regulation of Rho GTPase activity);GO:0005089(Rho guanyl-nucleotide exchange factor activity);GO:0005085(guanyl-nucleotide exchange factor activity);GO:0043547(positive regulation of GTPase activity);GO:0005737(cytoplasm)	NA	OK	6.37852	12.9916	-1.02628	down	0.0291	yes
XLOC_024097	XLOC_024097	ENSBTAT00000017392	PSPH	chr25:27954602-27977223	ENSBTAG00000013081	PSPH	Bos taurus phosphoserine phosphatase (PSPH), mRNA. [Source:RefSeq mRNA;Acc:NM_001046355]	GO:0006564(L-serine biosynthetic process);GO:0008253(5'-nucleotidase activity);GO:0008652(cellular amino acid biosynthetic process);GO:0006563(L-serine metabolic process);GO:0000287(magnesium ion binding);GO:0046872(metal ion binding);GO:0005509(calcium ion binding);GO:0016787(hydrolase activity);GO:0008152(metabolic process);GO:0005737(cytoplasm);GO:0016791(phosphatase activity);GO:0016311(depho…	00260(Glycine, serine and threonine metabolism)	OK	94.63	192.722	-1.02616	down	0.00825	yes
XLOC_005904	XLOC_005904	-	-	chr12:74453820-74520375	ENSBTAG00000040118	-	Uncharacterized protein [Source:UniProtKB/TrEMBL;Acc:E1BMY6]	GO:0045095(keratin filament);GO:0005882(intermediate filament)	NA	OK	7.17648	14.598	-1.02443	down	0.0283	yes
XLOC_032576	XLOC_032576	ENSBTAT00000008298	ALDH1L2	chr5:68883464-68941780	ENSBTAG00000006326	ALDH1L2	Bos taurus aldehyde dehydrogenase 1 family, member L2 (ALDH1L2), mRNA. [Source:RefSeq mRNA;Acc:NM_001191391]	GO:0016620(oxidoreductase activity, acting on the aldehyde or oxo group of donors, NAD or NADP as acceptor);GO:0006730(one-carbon metabolic process);GO:0055114(oxidation-reduction process);GO:0016491(oxidoreductase activity);GO:0032259(methylation);GO:0008168(methyltransferase activity);GO:0009058(biosynthetic process);GO:0008152(metabolic process);GO:0003824(catalytic activity);GO:0005737(cytopl…	00670(One carbon pool by folate)	OK	13.6425	27.7161	-1.02261	down	0.0139	yes
XLOC_035468	XLOC_035468	ENSBTAT00000020744	GDF15	chr7:4711321-4713460	ENSBTAG00000015618	GDF15	Bos taurus growth differentiation factor 15 (GDF15), mRNA. [Source:RefSeq mRNA;Acc:NM_001206298]	GO:0008083(growth factor activity);GO:1901741(positive regulation of myoblast fusion);GO:0005576(extracellular region);GO:0070062(extracellular vesicular exosome)	NA	OK	64.5331	130.532	-1.01629	down	0.01615	yes
XLOC_029708	XLOC_029708	ENSBTAT00000023490	HGF	chr4:39115918-39201194	ENSBTAG00000017664	HGF	Bos taurus hepatocyte growth factor (hepapoietin A; scatter factor) (HGF), mRNA. [Source:RefSeq mRNA;Acc:NM_001031751]	GO:0008083(growth factor activity);GO:0004252(serine-type endopeptidase activity);GO:0006508(proteolysis);GO:0003824(catalytic activity);GO:0060665(regulation of branching involved in salivary gland morphogenesis by mesenchymal-epithelial signaling);GO:0051450(myoblast proliferation);GO:0048012(hepatocyte growth factor receptor signaling pathway);GO:1902042(negative regulation of extrinsic apopto…	04060(Cytokine-cytokine receptor interaction);04510(Focal adhesion);05144(Malaria);05200(Pathways in cancer);05211(Renal cell carcinoma);05218(Melanoma)	OK	7.73624	15.6327	-1.01486	down	0.0252	yes
XLOC_030317	XLOC_030317	ENSBTAT00000007076	SOSTDC1	chr4:24927682-24931927	ENSBTAG00000005377	SOSTDC1	Bos taurus sclerostin domain containing 1 (SOSTDC1), mRNA. [Source:RefSeq mRNA;Acc:NM_001046265]	GO:0005615(extracellular space);GO:0060648(mammary gland bud morphogenesis);GO:0010454(negative regulation of cell fate commitment);GO:0042475(odontogenesis of dentin-containing tooth);GO:0030514(negative regulation of BMP signaling pathway);GO:0007389(pattern specification process);GO:0031069(hair follicle morphogenesis);GO:0090090(negative regulation of canonical Wnt signaling pathway);GO:00055…	NA	OK	6.99277	14.1255	-1.01437	down	0.04115	yes
XLOC_019560	XLOC_019560	ENSBTAT00000000857	MIPOL1	chr21:47852814-48169480	ENSBTAG00000000655	MIPOL1	mirror-image polydactyly 1 [Source:HGNC Symbol;Acc:HGNC:21460]	GO:0005634(nucleus)	NA	OK	18.1792	36.6417	-1.0112	down	0.01975	yes
XLOC_011513	XLOC_011513	ENSBTAT00000023574	KIFAP3	chr16:38360034-38502334	ENSBTAG00000017727	KIFAP3	Bos taurus kinesin-associated protein 3 (KIFAP3), mRNA. [Source:RefSeq mRNA;Acc:NM_001035329]	GO:0019894(kinesin binding);GO:0005515(protein binding);GO:0005871(kinesin complex);GO:0046587(positive regulation of calcium-dependent cell-cell adhesion);GO:0008104(protein localization);GO:0030990(intraciliary transport particle);GO:0016939(kinesin II complex);GO:1990075(periciliary membrane compartment);GO:0032391(photoreceptor connecting cilium);GO:0007017(microtubule-based process);GO:00360…	NA	OK	22.2192	44.738	-1.0097	down	0.0144	yes
XLOC_026068	XLOC_026068	-	-	chr28:7440652-7444794	ENSBTAG00000040118	-	Uncharacterized protein [Source:UniProtKB/TrEMBL;Acc:E1BMY6]	GO:0045095(keratin filament);GO:0005882(intermediate filament)	NA	OK	13.9728	28.0945	-1.00767	down	0.0165	yes
XLOC_010185	XLOC_010185	ENSBTAT00000002500	AKIP1	chr15:44250290-44267718	ENSBTAG00000001922	AKIP1	Bos taurus A kinase (PRKA) interacting protein 1 (AKIP1), mRNA. [Source:RefSeq mRNA;Acc:NM_001034203]	GO:0016310(phosphorylation);GO:0016301(kinase activity);GO:0034446(substrate adhesion-dependent cell spreading);GO:0005515(protein binding);GO:0005654(nucleoplasm)	NA	OK	19.8436	39.7624	-1.00273	down	0.02385	yes
XLOC_006028	XLOC_006028	ENSBTAT00000016261	MTRF1	chr12:11452168-11494344	ENSBTAG00000012260	MTRF1	Bos taurus mitochondrial translational release factor 1 (MTRF1), mRNA. [Source:RefSeq mRNA;Acc:NM_001035013]	GO:0006415(translational termination);GO:0003747(translation release factor activity);GO:0006412(translation);GO:0005739(mitochondrion);GO:0005737(cytoplasm);GO:0016149(translation release factor activity, codon specific)	NA	OK	6.64065	13.2792	-0.999778	down	0.03655	yes
XLOC_033724	XLOC_033724	ENSBTAT00000026154	SHROOM3	chr6:93321624-93399065	ENSBTAG00000019633	SHROOM3	Bos taurus shroom family member 3 (SHROOM3), mRNA. [Source:RefSeq mRNA;Acc:NM_001191524]	GO:0000902(cell morphogenesis);GO:0051015(actin filament binding);GO:0005737(cytoplasm);GO:0002066(columnar/cuboidal epithelial cell development);GO:0005912(adherens junction);GO:0007389(pattern specification process);GO:0045177(apical part of cell);GO:0016324(apical plasma membrane);GO:0001843(neural tube closure);GO:0043296(apical junction complex);GO:0030036(actin cytoskeleton organization);GO…	NA	OK	10.4268	20.8327	-0.998554	down	0.01325	yes
XLOC_032384	XLOC_032384	ENSBTAT00000038585	XPOT	chr5:49550708-49591147	ENSBTAG00000026962	XPOT	exportin, tRNA [Source:HGNC Symbol;Acc:HGNC:12826]	GO:0008536(Ran GTPase binding);GO:0006886(intracellular protein transport);GO:0006810(transport);GO:0005634(nucleus);GO:0006409(tRNA export from nucleus);GO:0005643(nuclear pore);GO:0000049(tRNA binding);GO:0005654(nucleoplasm);GO:0005737(cytoplasm);GO:0005488(binding)	NA	OK	67.8101	135.449	-0.998173	down	0.00985	yes
XLOC_005252	XLOC_005252	ENSBTAT00000032961	SLC5A6	chr11:72417618-72425559	ENSBTAG00000006832	SLC5A6	Bos taurus solute carrier family 5 (sodium-dependent vitamin transporter), member 6 (SLC5A6), mRNA. [Source:RefSeq mRNA;Acc:NM_001046219]	GO:0005215(transporter activity);GO:0055085(transmembrane transport);GO:0006810(transport);GO:0016021(integral component of membrane);GO:0016020(membrane)	NA	OK	21.9323	10.9532	1.0017	up	0.0202	yes
XLOC_033047	XLOC_033047	ENSBTAT00000009998	FKBP4	chr5:107445595-107453517	ENSBTAG00000007605	FKBP4	Bos taurus FK506 binding protein 4, 59kDa (FKBP4), mRNA. [Source:RefSeq mRNA;Acc:NM_001034322]	GO:0005515(protein binding);GO:0061077(chaperone-mediated protein folding);GO:0005528(FK506 binding);GO:0003755(peptidyl-prolyl cis-trans isomerase activity);GO:0000413(protein peptidyl-prolyl isomerization);GO:0006457(protein folding);GO:0005789(endoplasmic reticulum membrane);GO:0051219(phosphoprotein binding);GO:0046661(male sex differentiation);GO:0035259(glucocorticoid receptor binding);GO:0…	NA	OK	128.689	63.8279	1.01163	up	0.00985	yes
XLOC_007531	XLOC_007531	ENSBTAT00000010660	RBM38	chr13:59293605-59308857	ENSBTAG00000008105	RBM38	RNA binding motif protein 38 [Source:HGNC Symbol;Acc:HGNC:15818]	GO:0003676(nucleic acid binding);GO:0000166(nucleotide binding);GO:0010830(regulation of myotube differentiation);GO:0003729(mRNA binding);GO:0070935(3'-UTR-mediated mRNA stabilization);GO:0006978(DNA damage response, signal transduction by p53 class mediator resulting in transcription of p21 class mediator);GO:0003730(mRNA 3'-UTR binding);GO:0006977(DNA damage response, signal transduction by p5…	NA	OK	10.1044	5.00197	1.01441	up	0.04855	yes
XLOC_024843	XLOC_024843	ENSBTAT00000015584	ANKRD1	chr26:12571208-12580580	ENSBTAG00000011734	ANKRD1	Bos taurus ankyrin repeat domain 1 (cardiac muscle) (ANKRD1), mRNA. [Source:RefSeq mRNA;Acc:NM_001034378]	GO:0005515(protein binding);GO:0005634(nucleus);GO:0031432(titin binding);GO:0030016(myofibril);GO:0071222(cellular response to lipopolysaccharide);GO:0031674(I band);GO:0035690(cellular response to drug);GO:0003714(transcription corepressor activity);GO:0035914(skeletal muscle cell differentiation);GO:0005667(transcription factor complex);GO:0006357(regulation of transcription from RNA polymeras…	NA	OK	55.2413	27.219	1.02113	up	0.0124	yes
XLOC_021843	XLOC_021843	ENSBTAT00000007039	BAG2	chr23:2956935-2966980	ENSBTAG00000005355	BAG2	Bos taurus BCL2-associated athanogene 2 (BAG2), mRNA. [Source:RefSeq mRNA;Acc:NM_001034264]	GO:0051087(chaperone binding);GO:0019538(protein metabolic process);GO:0042802(identical protein binding);GO:0005515(protein binding)	NA	OK	23.8843	11.7297	1.0259	up	0.02095	yes
XLOC_037660	XLOC_037660	ENSBTAT00000013134	TRIM35	chr8:75681656-75697674	ENSBTAG00000009958	TRIM35	tripartite motif containing 35 [Source:HGNC Symbol;Acc:HGNC:16285]	GO:0005515(protein binding);GO:0005622(intracellular);GO:0046872(metal ion binding);GO:0008270(zinc ion binding);GO:0043065(positive regulation of apoptotic process);GO:0008285(negative regulation of cell proliferation);GO:0005737(cytoplasm);GO:0005634(nucleus);GO:0045930(negative regulation of mitotic cell cycle);GO:1902187(negative regulation of viral release from host cell);GO:0005654(nucleopl…	NA	OK	22.5148	11.0343	1.02888	up	0.0383	yes
XLOC_020356	XLOC_020356	ENSBTAT00000063984;ENSBTAT00000026423	TGFBR2	chr22:5141231-5233083	ENSBTAG00000019832	TGFBR2	Bos taurus transforming growth factor, beta receptor II (70/80kDa) (TGFBR2), mRNA. [Source:RefSeq mRNA;Acc:NM_001159566]	GO:0043235(receptor complex);GO:0007178(transmembrane receptor protein serine/threonine kinase signaling pathway);GO:0004702(receptor signaling protein serine/threonine kinase activity);GO:0004713(protein tyrosine kinase activity);GO:0023014(signal transduction by phosphorylation);GO:0016772(transferase activity, transferring phosphorus-containing groups);GO:0006468(protein phosphorylation);GO:00…	04010(MAPK signaling pathway);04060(Cytokine-cytokine receptor interaction);04144(Endocytosis);04350(TGF-beta signaling pathway);04520(Adherens junction);05142(Chagas disease);05200(Pathways in cancer);05210(Colorectal cancer);05212(Pancreatic cancer);05220(Chronic myeloid leukemia)	OK	37.0014	18.107	1.03103	up	0.0092	yes
XLOC_007458	XLOC_007458	ENSBTAT00000022161	SLC2A4RG	chr13:54502133-54505099	ENSBTAG00000016664	SLC2A4RG	SLC2A4 regulator [Source:HGNC Symbol;Acc:HGNC:15930]	GO:0046872(metal ion binding);GO:0005654(nucleoplasm)	NA	OK	38.8183	18.923	1.0366	up	0.02545	yes
XLOC_016064	XLOC_016064	ENSBTAT00000029249	ELAC2	chr19:31965967-31982783	ENSBTAG00000021939	ELAC2	elaC ribonuclease Z 2 [Source:HGNC Symbol;Acc:HGNC:14198]	GO:0008033(tRNA processing);GO:0016787(hydrolase activity);GO:0005739(mitochondrion);GO:0072684(mitochondrial tRNA 3'-trailer cleavage, endonucleolytic);GO:0005654(nucleoplasm);GO:0044822(poly(A) RNA binding);GO:0005634(nucleus)	NA	OK	16.6321	8.08438	1.04076	up	0.0191	yes
XLOC_014723	XLOC_014723	ENSBTAT00000042276	bta-mir-21	chr19:11032500-11034659	ENSBTAG00000029897	bta-mir-21	bta-mir-21 [Source:miRBase;Acc:MI0004742]	NA	NA	OK	16.9677	8.24493	1.04121	up	0.0232	yes
XLOC_027201	XLOC_027201	ENSBTAT00000027685	FIBP	chr29:44661697-44669667	ENSBTAG00000020775	FIBP	Bos taurus fibroblast growth factor (acidic) intracellular binding protein (FIBP), mRNA. [Source:RefSeq mRNA;Acc:NM_001075482]	GO:0017134(fibroblast growth factor binding);GO:0070527(platelet aggregation);GO:0005654(nucleoplasm);GO:0070062(extracellular vesicular exosome);GO:0005634(nucleus);GO:0016020(membrane)	NA	OK	27.5875	13.4006	1.04171	up	0.02675	yes
XLOC_015664	XLOC_015664	ENSBTAT00000013121	TRIM25	chr19:7937254-7959909	ENSBTAG00000009948	TRIM25	Bos taurus tripartite motif containing 25 (TRIM25), mRNA. [Source:RefSeq mRNA;Acc:NM_001100336]	GO:0005515(protein binding);GO:0046872(metal ion binding);GO:0008270(zinc ion binding);GO:0046597(negative regulation of viral entry into host cell);GO:1902187(negative regulation of viral release from host cell);GO:0045087(innate immune response);GO:0005737(cytoplasm);GO:1902186(regulation of viral release from host cell);GO:0046596(regulation of viral entry into host cell);GO:0051091(positive r…	04622(RIG-I-like receptor signaling pathway)	OK	97.8736	47.5222	1.04232	up	0.01155	yes
XLOC_017635	XLOC_017635	ENSBTAT00000024550	GCA	chr2:34173683-34193070	ENSBTAG00000018446	GCA	grancalcin, EF-hand calcium binding protein [Source:HGNC Symbol;Acc:HGNC:15990]	GO:0004198(calcium-dependent cysteine-type endopeptidase activity);GO:0006508(proteolysis);GO:0005509(calcium ion binding);GO:0005737(cytoplasm);GO:0042803(protein homodimerization activity);GO:0070062(extracellular vesicular exosome);GO:0046982(protein heterodimerization activity);GO:0005886(plasma membrane)	NA	OK	36.2852	17.5773	1.04567	up	0.01295	yes
XLOC_026530	XLOC_026530	ENSBTAT00000000071	FEN1	chr29:40931651-40936454	ENSBTAG00000000064	FEN1	Bos taurus flap structure-specific endonuclease 1 (FEN1), mRNA. [Source:RefSeq mRNA;Acc:NM_001035113]	GO:0004519(endonuclease activity);GO:0006260(DNA replication);GO:0016788(hydrolase activity, acting on ester bonds);GO:0006284(base-excision repair);GO:0005730(nucleolus);GO:0005654(nucleoplasm);GO:0000287(magnesium ion binding);GO:0000737(DNA catabolic process, endonucleolytic);GO:0006974(cellular response to DNA damage stimulus);GO:0006281(DNA repair);GO:0005739(mitochondrion);GO:0090305(nuclei…	03030(DNA replication);03410(Base excision repair);03450(Non-homologous end-joining)	OK	15.5348	7.5159	1.04749	up	0.0279	yes
XLOC_017573	XLOC_017573	ENSBTAT00000004495	CDCA7	chr2:23377567-23390741	ENSBTAG00000003458	CDCA7	Bos taurus cell division cycle associated 7 (CDCA7), mRNA. [Source:RefSeq mRNA;Acc:NM_001037488]	GO:0006915(apoptotic process);GO:0006351(transcription, DNA-templated);GO:0006355(regulation of transcription, DNA-templated);GO:0005634(nucleus);GO:0005737(cytoplasm);GO:0042127(regulation of cell proliferation);GO:0005654(nucleoplasm)	NA	OK	19.7725	9.47792	1.06085	up	0.0171	yes
XLOC_012115	XLOC_012115	ENSBTAT00000022893	DDX51	chr17:46015011-46022343	ENSBTAG00000017219	DDX51	DEAD (Asp-Glu-Ala-Asp) box polypeptide 51 [Source:HGNC Symbol;Acc:HGNC:20082]	GO:0003677(DNA binding);GO:0008026(ATP-dependent helicase activity);GO:0006200(ATP catabolic process);GO:0004386(helicase activity);GO:0016787(hydrolase activity);GO:0008152(metabolic process);GO:0005524(ATP binding);GO:0003676(nucleic acid binding);GO:0000166(nucleotide binding);GO:0044822(poly(A) RNA binding);GO:0016020(membrane)	NA	OK	12.1366	5.80503	1.06399	up	0.02955	yes
XLOC_007429	XLOC_007429	ENSBTAT00000025042;ENSBTAT00000059623	NOP56	chr13:52978728-52988922	ENSBTAG00000018812	NOP56	Bos taurus NOP56 ribonucleoprotein homolog (yeast) (NOP56), mRNA. [Source:RefSeq mRNA;Acc:NM_001033622]	GO:0070761(pre-snoRNP complex);GO:0030515(snoRNA binding);GO:0005732(small nucleolar ribonucleoprotein complex);GO:0005515(protein binding);GO:0044822(poly(A) RNA binding);GO:0005730(nucleolus);GO:0016020(membrane)	NA	OK	107.733	51.3119	1.0701	up	0.02295	yes
XLOC_015114	XLOC_015114	ENSBTAT00000034888	HOXB9	chr19:38503076-38508191	ENSBTAG00000025009	HOXB9	Bos taurus homeobox B9 (HOXB9), mRNA. [Source:RefSeq mRNA;Acc:NM_001191186]	GO:0043565(sequence-specific DNA binding);GO:0006351(transcription, DNA-templated);GO:0003700(sequence-specific DNA binding transcription factor activity);GO:0003677(DNA binding);GO:0006355(regulation of transcription, DNA-templated);GO:0005634(nucleus);GO:0048706(embryonic skeletal system development);GO:0030879(mammary gland development);GO:0009952(anterior/posterior pattern specification);GO:0…	NA	OK	11.9389	5.68507	1.07042	up	0.0232	yes
XLOC_024548	XLOC_024548	ENSBTAT00000029250	HPS6	chr26:22623886-22626506	ENSBTAG00000021942	HPS6	Bos taurus Hermansky-Pudlak syndrome 6 (HPS6), mRNA. [Source:RefSeq mRNA;Acc:NM_001081586]	GO:0031084(BLOC-2 complex);GO:0030742(GTP-dependent protein binding);GO:0072657(protein localization to membrane);GO:0017137(Rab GTPase binding);GO:0016020(membrane);GO:0005515(protein binding);GO:0043473(pigmentation);GO:0030318(melanocyte differentiation);GO:0007596(blood coagulation);GO:0006996(organelle organization)	NA	OK	12.8384	6.11037	1.07114	up	0.0253	yes
XLOC_038372	XLOC_038372	ENSBTAT00000008569	SOD2	chr9:97399158-97404522	ENSBTAG00000006523	SOD2	Bos taurus superoxide dismutase 2, mitochondrial (SOD2), mRNA. [Source:RefSeq mRNA;Acc:NM_201527]	GO:0006801(superoxide metabolic process);GO:0004784(superoxide dismutase activity);GO:0005759(mitochondrial matrix);GO:0030145(manganese ion binding);GO:0055114(oxidation-reduction process);GO:0016491(oxidoreductase activity);GO:0005739(mitochondrion);GO:0006357(regulation of transcription from RNA polymerase II promoter);GO:0046872(metal ion binding);GO:0055093(response to hyperoxia);GO:0048773(…	04146(Peroxisome);05016(Huntington's disease)	OK	217.863	103.285	1.07679	up	0.0151	yes
XLOC_015467	XLOC_015467	ENSBTAT00000025190	TRIM47	chr19:56373231-56377735	ENSBTAG00000018920	TRIM47	tripartite motif containing 47 [Source:HGNC Symbol;Acc:HGNC:19020]	GO:0005515(protein binding);GO:0005622(intracellular);GO:0046872(metal ion binding);GO:0008270(zinc ion binding);GO:0005737(cytoplasm)	NA	OK	27.8175	13.1736	1.07834	up	0.0127	yes
XLOC_032064	XLOC_032064	ENSBTAT00000017835	CSRP2	chr5:6266017-6274473	ENSBTAG00000013406	CSRP2	Bos taurus cysteine and glycine-rich protein 2 (CSRP2), mRNA. [Source:RefSeq mRNA;Acc:NM_001038183]	GO:0030154(cell differentiation);GO:0007275(multicellular organismal development);GO:0046872(metal ion binding);GO:0008270(zinc ion binding);GO:0005634(nucleus);GO:0005515(protein binding);GO:0005925(focal adhesion)	NA	OK	78.9622	37.1871	1.08636	up	0.0108	yes
XLOC_001454	XLOC_001454	ENSBTAT00000007435;ENSBTAT00000064205;ENSBTAT00000007428;ENSBTAT00000045385;ENSBTAT00000064633	ECE2	chr1:83507398-83539930	ENSBTAG00000005658	ECE2	endothelin converting enzyme 2 [Source:HGNC Symbol;Acc:HGNC:13275]	GO:0004222(metalloendopeptidase activity);GO:0008237(metallopeptidase activity);GO:0006508(proteolysis);GO:0032259(methylation);GO:0008168(methyltransferase activity);GO:0008152(metabolic process);GO:0016486(peptide hormone processing);GO:0030659(cytoplasmic vesicle membrane)	NA	OK	40.0872	18.5517	1.11159	up	0.04735	yes
XLOC_038882	XLOC_038882	-	-	chr9:97390464-97393766	ENSBTAG00000040118	-	Uncharacterized protein [Source:UniProtKB/TrEMBL;Acc:E1BMY6]	GO:0045095(keratin filament);GO:0005882(intermediate filament)	NA	OK	63.7148	29.4371	1.11399	up	0.00595	yes
XLOC_005112	XLOC_005112	ENSBTAT00000027808	MAT2A	chr11:49298516-49305187	ENSBTAG00000020873	MAT2A	Bos taurus methionine adenosyltransferase II, alpha (MAT2A), mRNA. [Source:RefSeq mRNA;Acc:NM_001101131]	GO:0006556(S-adenosylmethionine biosynthetic process);GO:0004478(methionine adenosyltransferase activity);GO:0006730(one-carbon metabolic process);GO:0016740(transferase activity);GO:0046872(metal ion binding);GO:0005524(ATP binding);GO:0000166(nucleotide binding);GO:0048269(methionine adenosyltransferase complex);GO:0005515(protein binding)	00270(Cysteine and methionine metabolism)	OK	79.0609	36.4503	1.11704	up	0.0054	yes
XLOC_019133	XLOC_019133	ENSBTAT00000048744	TRIP13	chr20:71496765-71511265	ENSBTAG00000006972	TRIP13	thyroid hormone receptor interactor 13 [Source:HGNC Symbol;Acc:HGNC:12307]	GO:0017111(nucleoside-triphosphatase activity);GO:0005524(ATP binding);GO:0000166(nucleotide binding);GO:0007144(female meiosis I);GO:0007141(male meiosis I);GO:0007131(reciprocal meiotic recombination);GO:0048477(oogenesis);GO:0001673(male germ cell nucleus);GO:0007130(synaptonemal complex assembly);GO:0007286(spermatid development);GO:0006302(double-strand break repair);GO:0001556(oocyte matura…	NA	OK	18.9701	8.71626	1.12194	up	0.01545	yes
XLOC_030129	XLOC_030129	-	-	chr4:112539056-112540131	ENSBTAG00000040118	-	Uncharacterized protein [Source:UniProtKB/TrEMBL;Acc:E1BMY6]	GO:0045095(keratin filament);GO:0005882(intermediate filament)	NA	OK	11.8599	5.35786	1.14637	up	0.0377	yes
XLOC_023802	XLOC_023802	ENSBTAT00000000348	RAB26	chr25:1680109-1687411	ENSBTAG00000000279	RAB26	Bos taurus RAB26, member RAS oncogene family (RAB26), mRNA. [Source:RefSeq mRNA;Acc:NM_001046209]	GO:0006913(nucleocytoplasmic transport);GO:0017157(regulation of exocytosis);GO:0003924(GTPase activity);GO:0006184(GTP catabolic process);GO:0007264(small GTPase mediated signal transduction);GO:0005525(GTP binding);GO:0007165(signal transduction);GO:0005622(intracellular);GO:0015031(protein transport);GO:0006886(intracellular protein transport);GO:0006810(transport);GO:0005886(plasma membrane);…	NA	OK	17.5351	7.90185	1.14999	up	0.03735	yes
XLOC_020836	XLOC_020836	-	-	chr22:59690790-59691851	ENSBTAG00000040118	-	Uncharacterized protein [Source:UniProtKB/TrEMBL;Acc:E1BMY6]	GO:0045095(keratin filament);GO:0005882(intermediate filament)	NA	OK	43.7345	19.6195	1.15649	up	0.0174	yes
XLOC_032236	XLOC_032236	ENSBTAT00000001950	ENSBTAG00000037775	chr5:30713143-30723571	ENSBTAG00000037775	-	Uncharacterized protein [Source:UniProtKB/TrEMBL;Acc:F1MNF8]	GO:0051258(protein polymerization);GO:0007017(microtubule-based process);GO:0003924(GTPase activity);GO:0006184(GTP catabolic process);GO:0005525(GTP binding);GO:0043234(protein complex);GO:0005874(microtubule);GO:0005856(cytoskeleton);GO:0005737(cytoplasm);GO:0000166(nucleotide binding);GO:0005200(structural constituent of cytoskeleton)	04145(Phagosome);04540(Gap junction)	OK	162.464	72.4791	1.16448	up	0.004	yes
XLOC_036431	XLOC_036431	ENSBTAT00000007324	CLU	chr8:11043940-11061301	ENSBTAG00000005574	CLU	Bos taurus clusterin (CLU), mRNA. [Source:RefSeq mRNA;Acc:NM_173902]	GO:0061077(chaperone-mediated protein folding);GO:0043065(positive regulation of apoptotic process);GO:0031012(extracellular matrix);GO:0043231(intracellular membrane-bounded organelle);GO:0050821(protein stabilization);GO:0031625(ubiquitin protein ligase binding);GO:0042583(chromaffin granule);GO:0005615(extracellular space);GO:0031966(mitochondrial membrane);GO:0005829(cytosol);GO:0048471(perin…	NA	OK	1978.86	879.921	1.16923	up	0.00875	yes
XLOC_019590	XLOC_019590	ENSBTAT00000009871	CKMT1	chr21:55876474-55882402	ENSBTAG00000007502	CKMT1	Bos taurus creatine kinase, mitochondrial 1B (CKMT1B), mRNA. [Source:RefSeq mRNA;Acc:NM_174275]	GO:0016772(transferase activity, transferring phosphorus-containing groups);GO:0005743(mitochondrial inner membrane);GO:0005739(mitochondrion);GO:0016310(phosphorylation);GO:0016301(kinase activity);GO:0016740(transferase activity);GO:0003824(catalytic activity);GO:0005524(ATP binding);GO:0000166(nucleotide binding);GO:0032091(negative regulation of protein binding);GO:0043066(negative regulation…	00330(Arginine and proline metabolism)	OK	11.237	4.97678	1.17497	up	0.0203	yes
XLOC_033169	XLOC_033169	ENSBTAT00000021948	RRP7A	chr5:113953265-113979415	ENSBTAG00000016510	RRP7A	Bos taurus ribosomal RNA processing 7 homolog A (S. cerevisiae) (RRP7A), mRNA. [Source:RefSeq mRNA;Acc:NM_001110074]	GO:0003676(nucleic acid binding);GO:0000166(nucleotide binding);GO:0044822(poly(A) RNA binding)	NA	OK	23.4532	10.3669	1.1778	up	0.04365	yes
XLOC_035746	XLOC_035746	ENSBTAT00000044908	UHRF1	chr7:20436669-20470587	ENSBTAG00000002224	UHRF1	Bos taurus ubiquitin-like with PHD and ring finger domains 1 (UHRF1), mRNA. [Source:RefSeq mRNA;Acc:NM_001103098]	GO:0051865(protein autoubiquitination);GO:0044729(hemi-methylated DNA-binding);GO:0016574(histone ubiquitination);GO:0010216(maintenance of DNA methylation);GO:0005657(replication fork);GO:0000792(heterochromatin);GO:0000791(euchromatin);GO:0000790(nuclear chromatin);GO:0005515(protein binding);GO:0035064(methylated histone binding);GO:0042787(protein ubiquitination involved in ubiquitin-dependen…	NA	OK	11.5906	5.10859	1.18195	up	0.008	yes
XLOC_021481	XLOC_021481	ENSBTAT00000035844	PAQR8	chr23:24528143-24572577	ENSBTAG00000025494	PAQR8	Bos taurus progestin and adipoQ receptor family member VIII (PAQR8), mRNA. [Source:RefSeq mRNA;Acc:NM_001101135]	GO:0048545(response to steroid hormone);GO:0005496(steroid binding);GO:0043401(steroid hormone mediated signaling pathway);GO:0003707(steroid hormone receptor activity);GO:0005886(plasma membrane);GO:0016021(integral component of membrane)	NA	OK	18.6467	8.20725	1.18395	up	0.00475	yes
XLOC_012650	XLOC_012650	-	-	chr17:53062209-53063135	ENSBTAG00000040118	-	Uncharacterized protein [Source:UniProtKB/TrEMBL;Acc:E1BMY6]	GO:0045095(keratin filament);GO:0005882(intermediate filament)	NA	OK	15.9775	7.01772	1.18697	up	0.03225	yes
XLOC_021255	XLOC_021255	-	-	chr22:59688494-59690501	ENSBTAG00000040118	-	Uncharacterized protein [Source:UniProtKB/TrEMBL;Acc:E1BMY6]	GO:0045095(keratin filament);GO:0005882(intermediate filament)	NA	OK	15.6643	6.869	1.18931	up	0.01655	yes
XLOC_026813	XLOC_026813	ENSBTAT00000001624	SLC25A22	chr29:50835239-50839686	ENSBTAG00000001229	SLC25A22	Bos taurus solute carrier family 25 (mitochondrial carrier: glutamate), member 22 (SLC25A22), mRNA. [Source:RefSeq mRNA;Acc:NM_001075159]	GO:0015293(symporter activity);GO:0005743(mitochondrial inner membrane);GO:0005739(mitochondrion);GO:0055085(transmembrane transport);GO:0006810(transport);GO:0016021(integral component of membrane);GO:0015813(L-glutamate transport);GO:0089711(L-glutamate transmembrane transport);GO:0005313(L-glutamate transmembrane transporter activity);GO:0005654(nucleoplasm);GO:0016020(membrane)	NA	OK	17.3075	7.5444	1.19792	up	0.00995	yes
XLOC_005420	XLOC_005420	ENSBTAT00000016929;ENSBTAT00000016930	PTRH1	chr11:98400783-98408784	ENSBTAG00000012736	PTRH1	peptidyl-tRNA hydrolase 1 homolog (S. cerevisiae) [Source:HGNC Symbol;Acc:HGNC:27039]	GO:0008152(metabolic process);GO:0005739(mitochondrion);GO:0044822(poly(A) RNA binding);GO:0004045(aminoacyl-tRNA hydrolase activity)	NA	OK	10.86	4.64559	1.22508	up	0.04685	yes
XLOC_010652	XLOC_010652	ENSBTAT00000013738	IKBKE	chr16:4109777-4136599	ENSBTAG00000010408	IKBKE	inhibitor of kappa light polypeptide gene enhancer in B-cells, kinase epsilon [Source:HGNC Symbol;Acc:HGNC:14552]	GO:0004713(protein tyrosine kinase activity);GO:0016772(transferase activity, transferring phosphorus-containing groups);GO:0006468(protein phosphorylation);GO:0004672(protein kinase activity);GO:0005524(ATP binding);GO:0000166(nucleotide binding);GO:0008384(IkappaB kinase activity);GO:0005515(protein binding);GO:0004704(NF-kappaB-inducing kinase activity);GO:0038061(NIK/NF-kappaB signaling);GO:0…	04620(Toll-like receptor signaling pathway);04622(RIG-I-like receptor signaling pathway);04623(Cytosolic DNA-sensing pathway)	OK	19.7935	8.43868	1.22994	up	0.0062	yes
XLOC_008513	XLOC_008513	ENSBTAT00000011066	MYC	chr14:13769243-13774438	ENSBTAG00000008409	MYC	Bos taurus v-myc myelocytomatosis viral oncogene homolog (avian) (MYC), mRNA. [Source:RefSeq mRNA;Acc:NM_001046074]	GO:0009314(response to radiation);GO:0050679(positive regulation of epithelial cell proliferation);GO:0032403(protein complex binding);GO:2001022(positive regulation of response to DNA damage stimulus);GO:0060070(canonical Wnt signaling pathway);GO:0045893(positive regulation of transcription, DNA-templated);GO:0005819(spindle);GO:0006879(cellular iron ion homeostasis);GO:0045944(positive regulat…	04010(MAPK signaling pathway);04012(ErbB signaling pathway);04110(Cell cycle);04310(Wnt signaling pathway);04350(TGF-beta signaling pathway);04630(Jak-STAT signaling pathway);05200(Pathways in cancer);05210(Colorectal cancer);05213(Endometrial cancer);05216(Thyroid cancer);05219(Bladder cancer);05220(Chronic myeloid leukemia);05221(Acute myeloid leukemia);05222(Small cell lung cancer)	OK	98.8789	41.678	1.24638	up	0.002	yes
XLOC_012325	XLOC_012325	ENSBTAT00000024112	MTP18	chr17:71575828-71579430	ENSBTAG00000018116	MTP18	Bos taurus mitochondrial fission process 1 (MTFP1), mRNA. [Source:RefSeq mRNA;Acc:NM_001075863]	GO:0000266(mitochondrial fission);GO:0005743(mitochondrial inner membrane)	NA	OK	15.0081	6.32532	1.24653	up	0.02195	yes
XLOC_026758	XLOC_026758	ENSBTAT00000023277	CCND1	chr29:47539868-47555688	ENSBTAG00000017514	CCND1	Bos taurus cyclin D1 (CCND1), mRNA. [Source:RefSeq mRNA;Acc:NM_001046273]	GO:0017053(transcriptional repressor complex);GO:0071157(negative regulation of cell cycle arrest);GO:0001934(positive regulation of protein phosphorylation);GO:0019901(protein kinase binding);GO:0000079(regulation of cyclin-dependent protein serine/threonine kinase activity);GO:0051726(regulation of cell cycle);GO:0051301(cell division);GO:0003714(transcription corepressor activity);GO:0006974(c…	04110(Cell cycle);04115(p53 signaling pathway);04310(Wnt signaling pathway);04510(Focal adhesion);04630(Jak-STAT signaling pathway);05200(Pathways in cancer);05210(Colorectal cancer);05212(Pancreatic cancer);05213(Endometrial cancer);05214(Glioma);05215(Prostate cancer);05216(Thyroid cancer);05218(Melanoma);05219(Bladder cancer);05220(Chronic myeloid leukemia);05221(Acute myeloid leukemia);05222(…	OK	45.94	19.1559	1.26196	up	0.00835	yes
XLOC_022824	XLOC_022824	ENSBTAT00000006297	GRP	chr24:58710083-58722860	ENSBTAG00000004796	GRP	Bos taurus gastrin-releasing peptide (GRP), mRNA. [Source:RefSeq mRNA;Acc:NM_001101239]	GO:0048565(digestive tract development);GO:0007218(neuropeptide signaling pathway);GO:0005576(extracellular region);GO:0005184(neuropeptide hormone activity);GO:0005615(extracellular space)	NA	OK	87.0954	36.0632	1.27207	up	0.00585	yes
XLOC_016082	XLOC_016082	ENSBTAT00000009974	ADORA2B	chr19:34084442-34104983	ENSBTAG00000007581	ADORA2B	Bos taurus adenosine A2b receptor (ADORA2B), mRNA. [Source:RefSeq mRNA;Acc:NM_001075925]	GO:0001973(adenosine receptor signaling pathway);GO:0007186(G-protein coupled receptor signaling pathway);GO:0007165(signal transduction);GO:0004930(G-protein coupled receptor activity);GO:0004871(signal transducer activity);GO:0005886(plasma membrane);GO:0016021(integral component of membrane);GO:0002882(positive regulation of chronic inflammatory response to non-antigenic stimulus);GO:0010575(p…	04020(Calcium signaling pathway);04080(Neuroactive ligand-receptor interaction);04270(Vascular smooth muscle contraction)	OK	14.7997	6.10628	1.2772	up	0.00975	yes
XLOC_017333	XLOC_017333	ENSBTAT00000020254	RSRP1	chr2:128302926-128307122	ENSBTAG00000015222	RSRP1	arginine/serine-rich protein 1 [Source:HGNC Symbol;Acc:HGNC:25234]	NA	NA	OK	15.6464	6.44703	1.27912	up	0.00895	yes
XLOC_034493	XLOC_034493	ENSBTAT00000048089;ENSBTAT00000063901	CIST1	chr7:4843441-4910673	ENSBTAG00000033886	CIST1	Bos taurus intestine-specific transcript 1 protein (CIST1), mRNA. [Source:RefSeq mRNA;Acc:NM_001075271]	NA	NA	OK	10.2579	4.22567	1.27948	up	0.04535	yes
XLOC_003741	XLOC_003741	ENSBTAT00000064532	GPX2	chr10:77381299-77384955	ENSBTAG00000048112	GPX2	Bos taurus glutathione peroxidase 2 (gastrointestinal) (GPX2), mRNA. [Source:RefSeq mRNA;Acc:NM_001163139]	GO:0004602(glutathione peroxidase activity);GO:0004601(peroxidase activity);GO:0006979(response to oxidative stress);GO:0055114(oxidation-reduction process);GO:0016491(oxidoreductase activity);GO:0051702(interaction with symbiont);GO:0009609(response to symbiotic bacterium);GO:0002862(negative regulation of inflammatory response to antigenic stimulus);GO:0001659(temperature homeostasis);GO:007006…	NA	OK	34.0958	14.0178	1.28234	up	0.0089	yes
XLOC_020747	XLOC_020747	ENSBTAT00000012611	CDC25A	chr22:52242565-52265777	ENSBTAG00000009586	CDC25A	Bos taurus cell division cycle 25 homolog A (S. pombe) (CDC25A), mRNA. [Source:RefSeq mRNA;Acc:NM_001101100]	GO:0009314(response to radiation);GO:0004721(phosphoprotein phosphatase activity);GO:0051301(cell division);GO:0007067(mitotic nuclear division);GO:0007049(cell cycle);GO:0005622(intracellular);GO:0016787(hydrolase activity);GO:0035335(peptidyl-tyrosine dephosphorylation);GO:0005737(cytoplasm);GO:0005634(nucleus);GO:0006470(protein dephosphorylation);GO:0004725(protein tyrosine phosphatase activi…	04110(Cell cycle);04914(Progesterone-mediated oocyte maturation)	OK	11.0749	4.47941	1.30591	up	0.00735	yes
XLOC_009602	XLOC_009602	ENSBTAT00000044328	SLC35C1	chr15:76724921-76731746	ENSBTAG00000003199	SLC35C1	Bos taurus solute carrier family 35, member C1 (SLC35C1), mRNA. [Source:RefSeq mRNA;Acc:NM_001101210]	GO:0008643(carbohydrate transport);GO:0055085(transmembrane transport);GO:0006810(transport);GO:0005794(Golgi apparatus);GO:0000139(Golgi membrane);GO:0016021(integral component of membrane);GO:0030259(lipid glycosylation);GO:0045746(negative regulation of Notch signaling pathway);GO:0016020(membrane)	NA	OK	49.9063	20.0302	1.31704	up	0.0038	yes
XLOC_005508	XLOC_005508	-	-	chr11:104292373-104293054	ENSBTAG00000040118	-	Uncharacterized protein [Source:UniProtKB/TrEMBL;Acc:E1BMY6]	GO:0045095(keratin filament);GO:0005882(intermediate filament)	NA	OK	13.3852	5.3501	1.323	up	0.03705	yes
XLOC_038228	XLOC_038228	ENSBTAT00000000557	TNFAIP3	chr9:76762898-76778776	ENSBTAG00000000436	TNFAIP3	tumor necrosis factor, alpha-induced protein 3 [Source:HGNC Symbol;Acc:HGNC:11896]	GO:0003677(DNA binding);GO:0008270(zinc ion binding);GO:0070433(negative regulation of nucleotide-binding oligomerization domain containing 2 signaling pathway);GO:0070429(negative regulation of nucleotide-binding oligomerization domain containing 1 signaling pathway);GO:0034148(negative regulation of toll-like receptor 5 signaling pathway);GO:0002677(negative regulation of chronic inflammatory r…	04621(NOD-like receptor signaling pathway)	OK	21.68	8.63383	1.32829	up	0.00365	yes
XLOC_019080	XLOC_019080	-	-	chr20:67939575-67939853	ENSBTAG00000040118	-	Uncharacterized protein [Source:UniProtKB/TrEMBL;Acc:E1BMY6]	GO:0045095(keratin filament);GO:0005882(intermediate filament)	NA	OK	53.9482	21.3075	1.34021	up	0.0483	yes
XLOC_018912	XLOC_018912	ENSBTAT00000024287	SLC1A3	chr20:37596573-37679976	ENSBTAG00000018245	SLC1A3	Bos taurus solute carrier family 1 (glial high affinity glutamate transporter), member 3 (SLC1A3), mRNA. [Source:RefSeq mRNA;Acc:NM_174600]	GO:0017153(sodium:dicarboxylate symporter activity);GO:0006835(dicarboxylic acid transport);GO:0043025(neuronal cell body);GO:0042995(cell projection);GO:0015293(symporter activity);GO:0055085(transmembrane transport);GO:0006810(transport);GO:0016021(integral component of membrane);GO:0051938(L-glutamate import);GO:0050806(positive regulation of synaptic transmission);GO:0043205(fibril);GO:003122…	NA	OK	15.3571	5.82466	1.39866	up	0.0026	yes
XLOC_032187	XLOC_032187	-	-	chr5:27812675-27813366	ENSBTAG00000040118	-	Uncharacterized protein [Source:UniProtKB/TrEMBL;Acc:E1BMY6]	GO:0045095(keratin filament);GO:0005882(intermediate filament)	NA	OK	13.5593	5.10639	1.4089	up	0.0319	yes
XLOC_014065	XLOC_014065	ENSBTAT00000032384;ENSBTAT00000056565	PLLP	chr18:25342297-25348163	ENSBTAG00000011700	PLLP	Bos taurus plasmolipin (PLLP), mRNA. [Source:RefSeq mRNA;Acc:NM_001099123]	GO:0016021(integral component of membrane);GO:0016020(membrane);GO:0070062(extracellular vesicular exosome)	NA	OK	20.0427	7.48848	1.42033	up	0.01035	yes
XLOC_010804	XLOC_010804	ENSBTAT00000006978	SRM	chr16:43445562-43449517	ENSBTAG00000005304	SRM	spermidine synthase [Source:HGNC Symbol;Acc:HGNC:11296]	GO:0016740(transferase activity);GO:0008152(metabolic process);GO:0003824(catalytic activity);GO:0004766(spermidine synthase activity);GO:0042803(protein homodimerization activity)	00270(Cysteine and methionine metabolism);00330(Arginine and proline metabolism);00410(beta-Alanine metabolism);00480(Glutathione metabolism)	OK	57.3738	21.3785	1.42423	up	0.00135	yes
XLOC_023806	XLOC_023806	ENSBTAT00000059743	SNORD60	chr25:1692126-1694089	ENSBTAG00000042751	SNORD60	Small nucleolar RNA SNORD60 [Source:RFAM;Acc:RF00271]	NA	NA	OK	12.2767	4.50287	1.447	up	0.00545	yes
XLOC_025649	XLOC_025649	ENSBTAT00000013435	URB2	chr28:596883-623066	ENSBTAG00000010180	URB2	URB2 ribosome biogenesis 2 homolog (S. cerevisiae) [Source:HGNC Symbol;Acc:HGNC:28967]	GO:0016235(aggresome);GO:0005730(nucleolus);GO:0005634(nucleus)	NA	OK	11.7321	4.28032	1.45467	up	0.00085	yes
XLOC_007651	XLOC_007651	ENSBTAT00000006947	ADA	chr13:73750478-73774021	ENSBTAG00000005280	ADA	Bos taurus adenosine deaminase (ADA), mRNA. [Source:RefSeq mRNA;Acc:NM_173887]	GO:0019239(deaminase activity);GO:0009168(purine ribonucleoside monophosphate biosynthetic process);GO:0004000(adenosine deaminase activity);GO:0070256(negative regulation of mucus secretion);GO:0060407(negative regulation of penile erection);GO:0050862(positive regulation of T cell receptor signaling pathway);GO:0046111(xanthine biosynthetic process);GO:0046103(inosine biosynthetic process);GO:0…	00230(Purine metabolism);05340(Primary immunodeficiency)	OK	16.5671	5.91139	1.48675	up	0.0046	yes
XLOC_005854	XLOC_005854	ENSBTAT00000004569	SLAIN1	chr12:53188750-53241317	ENSBTAG00000003511	SLAIN1	SLAIN motif family, member 1 [Source:HGNC Symbol;Acc:HGNC:26387]	NA	NA	OK	23.911	8.47046	1.49716	up	0.00145	yes
XLOC_033777	XLOC_033777	ENSBTAT00000023468	BMP3	chr6:97585015-97613064	ENSBTAG00000017642	BMP3	Bos taurus bone morphogenetic protein 3 (BMP3), mRNA. [Source:RefSeq mRNA;Acc:NM_001192268]	GO:0051216(cartilage development);GO:0001503(ossification);GO:0040007(growth);GO:0005125(cytokine activity);GO:0005615(extracellular space);GO:0008083(growth factor activity);GO:0030154(cell differentiation);GO:0007275(multicellular organismal development);GO:0045944(positive regulation of transcription from RNA polymerase II promoter);GO:0005576(extracellular region);GO:0070700(BMP receptor bind…	NA	OK	123.506	43.4763	1.50627	up	0.00015	yes
XLOC_033779	XLOC_033779	-	-	chr6:97616369-97616987	ENSBTAG00000040118	-	Uncharacterized protein [Source:UniProtKB/TrEMBL;Acc:E1BMY6]	GO:0045095(keratin filament);GO:0005882(intermediate filament)	NA	OK	115.975	40.3619	1.52275	up	0.0011	yes
XLOC_025676	XLOC_025676	-	-	chr28:3619448-3619740	ENSBTAG00000040118	-	Uncharacterized protein [Source:UniProtKB/TrEMBL;Acc:E1BMY6]	GO:0045095(keratin filament);GO:0005882(intermediate filament)	NA	OK	314.778	107.635	1.54819	up	0.00295	yes
XLOC_022329	XLOC_022329	ENSBTAT00000025614	BMP6	chr23:47354093-47510231	ENSBTAG00000019234	BMP6	bone morphogenetic protein 6 [Source:HGNC Symbol;Acc:HGNC:1073]	GO:0040007(growth);GO:0008083(growth factor activity);GO:0001938(positive regulation of endothelial cell proliferation);GO:0045603(positive regulation of endothelial cell differentiation);GO:0030539(male genitalia development);GO:0001649(osteoblast differentiation);GO:0001822(kidney development);GO:0045666(positive regulation of neuron differentiation);GO:0030509(BMP signaling pathway);GO:0006954…	NA	OK	12.7875	4.34438	1.55752	up	0.0031	yes
XLOC_037673	XLOC_037673	ENSBTAT00000004312	NOL6	chr8:76540580-76552717	ENSBTAG00000003323	NOL6	Bos taurus nucleolar protein family 6 (RNA-associated) (NOL6), mRNA. [Source:RefSeq mRNA;Acc:NM_001099185]	GO:0000794(condensed nuclear chromosome);GO:0005730(nucleolus);GO:0003723(RNA binding);GO:0044822(poly(A) RNA binding);GO:0005739(mitochondrion);GO:0005634(nucleus)	NA	OK	16.2992	5.50635	1.56564	up	0.0001	yes
XLOC_033700	XLOC_033700	ENSBTAT00000065665;ENSBTAT00000022366	GRO1	chr6:90822747-90824841	ENSBTAG00000037558	GRO1	Bos taurus chemokine (C-X-C motif) ligand 1 (melanoma growth stimulating activity, alpha) (GRO1), mRNA. [Source:RefSeq mRNA;Acc:NM_175700]	GO:0008009(chemokine activity);GO:0060326(cell chemotaxis);GO:0005125(cytokine activity);GO:0005615(extracellular space);GO:0008083(growth factor activity);GO:0006954(inflammatory response);GO:0005576(extracellular region);GO:0006955(immune response)	04062(Chemokine signaling pathway)	OK	20.1548	6.48594	1.63574	up	0.0028	yes
XLOC_014413	XLOC_014413	ENSBTAT00000014709	MGC137708	chr18:57317722-57324156	ENSBTAG00000011079	MGC137708	Bos taurus uncharacterized LOC516719 (MGC137708), transcript variant 1, mRNA. [Source:RefSeq mRNA;Acc:NM_001046227]	NA	NA	OK	20.7862	6.67129	1.63959	up	0.0012	yes
XLOC_020150	XLOC_020150	ENSBTAT00000022183	BIKBA	chr21:46065548-46068942	ENSBTAG00000016683	BIKBA	Bos taurus nuclear factor of kappa light polypeptide gene enhancer in B-cells inhibitor, alpha (NFKBIA), mRNA. [Source:RefSeq mRNA;Acc:NM_001045868]	GO:0005515(protein binding);GO:0042127(regulation of cell proliferation);GO:0043330(response to exogenous dsRNA);GO:0031625(ubiquitin protein ligase binding);GO:0005634(nucleus);GO:0005737(cytoplasm);GO:0070431(nucleotide-binding oligomerization domain containing 2 signaling pathway);GO:0070427(nucleotide-binding oligomerization domain containing 1 signaling pathway);GO:0000060(protein import int…	04062(Chemokine signaling pathway);04210(Apoptosis);04620(Toll-like receptor signaling pathway);04621(NOD-like receptor signaling pathway);04622(RIG-I-like receptor signaling pathway);04623(Cytosolic DNA-sensing pathway);04660(T cell receptor signaling pathway);04662(B cell receptor signaling pathway);04722(Neurotrophin signaling pathway);04920(Adipocytokine signaling pathway);05140(Leishmaniasis…	OK	95.8597	30.6436	1.64534	up	0.0001	yes
XLOC_010107	XLOC_010107	ENSBTAT00000017497	HSPA8	chr15:34216266-34220920	ENSBTAG00000013162	HSPA8	Bos taurus heat shock 70kDa protein 8 (HSPA8), mRNA. [Source:RefSeq mRNA;Acc:NM_174345]	GO:0005515(protein binding);GO:0000902(cell morphogenesis);GO:0006950(response to stress);GO:0042470(melanosome);GO:0030529(ribonucleoprotein complex);GO:0005730(nucleolus);GO:0045892(negative regulation of transcription, DNA-templated);GO:0008380(RNA splicing);GO:0006397(mRNA processing);GO:0005681(spliceosomal complex);GO:0006351(transcription, DNA-templated);GO:0005886(plasma membrane);GO:0006…	03040(Spliceosome);04010(MAPK signaling pathway);04144(Endocytosis);04612(Antigen processing and presentation)	OK	2146.09	682.932	1.6519	up	0.00015	yes
XLOC_033778	XLOC_033778	-	-	chr6:97613249-97614366	ENSBTAG00000040118	-	Uncharacterized protein [Source:UniProtKB/TrEMBL;Acc:E1BMY6]	GO:0045095(keratin filament);GO:0005882(intermediate filament)	NA	OK	146.671	45.6829	1.68285	up	0.0002	yes
XLOC_009470	XLOC_009470	ENSBTAT00000052678	P2RY2	chr15:53484172-53499485	ENSBTAG00000039050	P2RY2	purinergic receptor P2Y, G-protein coupled, 2 [Source:HGNC Symbol;Acc:HGNC:8541]	GO:0045028(G-protein coupled purinergic nucleotide receptor activity);GO:0035589(G-protein coupled purinergic nucleotide receptor signaling pathway);GO:0007186(G-protein coupled receptor signaling pathway);GO:0007165(signal transduction);GO:0004930(G-protein coupled receptor activity);GO:0004871(signal transducer activity);GO:0016021(integral component of membrane);GO:0070257(positive regulation …	04080(Neuroactive ligand-receptor interaction)	OK	28.4949	8.73262	1.70622	up	0.00035	yes
XLOC_033699	XLOC_033699	ENSBTAT00000045994	CXCL3	chr6:90811061-90813079	ENSBTAG00000037778	CXCL3	Bos taurus chemokine (C-X-C motif) ligand 3 (CXCL3), mRNA. [Source:RefSeq mRNA;Acc:NM_001046513]	GO:0008009(chemokine activity);GO:0060326(cell chemotaxis);GO:0005125(cytokine activity);GO:0005615(extracellular space);GO:0005576(extracellular region);GO:0006955(immune response)	04062(Chemokine signaling pathway)	OK	43.4514	12.7851	1.76494	up	0.00055	yes
XLOC_019448	XLOC_019448	-	-	chr21:28220557-28221003	ENSBTAG00000040118	-	Uncharacterized protein [Source:UniProtKB/TrEMBL;Acc:E1BMY6]	GO:0045095(keratin filament);GO:0005882(intermediate filament)	NA	OK	19.8235	5.4737	1.85662	up	0.02105	yes
XLOC_026981	XLOC_026981	ENSBTAT00000030328	SAA3	chr29:26668046-26671801	ENSBTAG00000022396	SAA3	Bos taurus serum amyloid A 3 (SAA3), mRNA. [Source:RefSeq mRNA;Acc:NM_181016]	GO:0006953(acute-phase response);GO:0005576(extracellular region);GO:0034364(high-density lipoprotein particle)	NA	OK	46.8158	12.0031	1.96359	up	0.0008	yes
XLOC_013141	XLOC_013141	ENSBTAT00000034627	CX3CL1	chr18:25464212-25475151	ENSBTAG00000024869	CX3CL1	chemokine (C-X3-C motif) ligand 1 [Source:HGNC Symbol;Acc:HGNC:10647]	GO:0008009(chemokine activity);GO:0048247(lymphocyte chemotaxis);GO:0048246(macrophage chemotaxis);GO:0032914(positive regulation of transforming growth factor beta1 production);GO:2001240(negative regulation of extrinsic apoptotic signaling pathway in absence of ligand);GO:0045766(positive regulation of angiogenesis);GO:0060055(angiogenesis involved in wound healing);GO:0030593(neutrophil chemot…	NA	OK	16.4455	3.95759	2.055	up	0.0001	yes
XLOC_007436	XLOC_007436	ENSBTAT00000006432	TGM3	chr13:53261630-53304213	ENSBTAG00000001785	TGM3	Bos taurus transglutaminase 3 (E polypeptide, protein-glutamine-gamma-glutamyltransferase) (TGM3), mRNA. [Source:RefSeq mRNA;Acc:NM_001101848]	GO:0018149(peptide cross-linking);GO:0003810(protein-glutamine gamma-glutamyltransferase activity);GO:0046872(metal ion binding);GO:0043163(cell envelope organization);GO:0030216(keratinocyte differentiation);GO:0070062(extracellular vesicular exosome);GO:0031234(extrinsic component of cytoplasmic side of plasma membrane);GO:0051262(protein tetramerization);GO:0003824(catalytic activity);GO:00057…	NA	OK	27.9482	6.61341	2.07929	up	0.00015	yes
XLOC_012751	XLOC_012751	ENSBTAT00000019477;ENSBTAT00000016856	OAS1Y,OAS2	chr17:63611773-63646163	NA	NA	NA	NA	NA	OK	18.8172	4.4349	2.08508	up	0.0001	yes
XLOC_011687	XLOC_011687	ENSBTAT00000019573	ISG15	chr16:52714626-52715665	ENSBTAG00000014707	ISG15	Bos taurus ISG15 ubiquitin-like modifier (ISG15), mRNA. [Source:RefSeq mRNA;Acc:NM_174366]	GO:0005515(protein binding);GO:0031397(negative regulation of protein ubiquitination);GO:0042742(defense response to bacterium);GO:0051607(defense response to virus);GO:0005737(cytoplasm);GO:0031386(protein tag);GO:0045648(positive regulation of erythrocyte differentiation);GO:0032020(ISG15-protein conjugation);GO:0019941(modification-dependent protein catabolic process);GO:0034340(response to ty…	04622(RIG-I-like receptor signaling pathway)	OK	11.4536	2.61661	2.13003	up	0.01265	yes
XLOC_000524	XLOC_000524	ENSBTAT00000017476	CLDN1	chr1:77596385-77612605	ENSBTAG00000013148	CLDN1	Bos taurus claudin 1 (CLDN1), mRNA. [Source:RefSeq mRNA;Acc:NM_001001854]	GO:0005923(tight junction);GO:0030054(cell junction);GO:0005887(integral component of plasma membrane);GO:0005886(plasma membrane);GO:0005198(structural molecule activity);GO:0016021(integral component of membrane);GO:0016338(calcium-independent cell-cell adhesion via plasma membrane cell-adhesion molecules);GO:0016328(lateral plasma membrane);GO:0016324(apical plasma membrane);GO:0061436(establi…	04514(Cell adhesion molecules (CAMs));04530(Tight junction);04670(Leukocyte transendothelial migration)	OK	20.1448	4.42176	2.18771	up	5e-05	yes
XLOC_033695	XLOC_033695	ENSBTAT00000012939	CXCL6	chr6:90645963-90648076	ENSBTAG00000009812	CXCL6	Bos taurus chemokine (C-X-C motif) ligand 6 (granulocyte chemotactic protein 2) (CXCL6), mRNA. [Source:RefSeq mRNA;Acc:NM_174300]	GO:0008201(heparin binding);GO:0008009(chemokine activity);GO:0060326(cell chemotaxis);GO:0005125(cytokine activity);GO:0005615(extracellular space);GO:0042742(defense response to bacterium);GO:0006935(chemotaxis);GO:0070951(regulation of neutrophil mediated killing of gram-negative bacterium);GO:0001776(leukocyte homeostasis);GO:0032496(response to lipopolysaccharide);GO:0032642(regulation of ch…	04062(Chemokine signaling pathway)	OK	808.399	172.764	2.22626	up	5e-05	yes
XLOC_035077	XLOC_035077	-	-	chr7:52213371-52214477	ENSBTAG00000040118	-	Uncharacterized protein [Source:UniProtKB/TrEMBL;Acc:E1BMY6]	GO:0045095(keratin filament);GO:0005882(intermediate filament)	NA	OK	10.4645	1.94589	2.427	up	0.00235	yes
XLOC_014058	XLOC_014058	ENSBTAT00000034373	MT2	chr18:24125365-24126717	ENSBTAG00000023659	MT2	Bos taurus metallothionein 2A (MT2A), mRNA. [Source:RefSeq mRNA;Acc:NM_001075140]	GO:0048471(perinuclear region of cytoplasm);GO:0046872(metal ion binding);GO:0008270(zinc ion binding);GO:0005634(nucleus);GO:0005737(cytoplasm);GO:0071294(cellular response to zinc ion);GO:0045926(negative regulation of growth)	NA	OK	1069.17	31.0936	5.10374	up	5e-05	yes
XLOC_036389	XLOC_036389	-	-	chr8:5477586-5477766	ENSBTAG00000040118	-	Uncharacterized protein [Source:UniProtKB/TrEMBL;Acc:E1BMY6]	GO:0045095(keratin filament);GO:0005882(intermediate filament)	NA	OK	14.1425	0	inf	up	0.0335	yes
XLOC_030795	XLOC_030795	-	-	chr4:107556366-107556568	ENSBTAG00000040118	-	Uncharacterized protein [Source:UniProtKB/TrEMBL;Acc:E1BMY6]	GO:0045095(keratin filament);GO:0005882(intermediate filament)	NA	OK	17.32	0	inf	up	0.00845	yes
XLOC_033604	XLOC_033604	ENSBTAT00000064646	bta-mir-4449	chr6:70048261-70048796	ENSBTAG00000045496	bta-mir-4449	bta-mir-4449 [Source:miRBase;Acc:MI0031502]	NA	NA	OK	19.0084	0	inf	up	0.00065	yes
XLOC_030394	XLOC_030394	-	-	chr4:46462544-46462759	ENSBTAG00000040118	-	Uncharacterized protein [Source:UniProtKB/TrEMBL;Acc:E1BMY6]	GO:0045095(keratin filament);GO:0005882(intermediate filament)	NA	OK	22.6587	0	inf	up	0.0012	yes
XLOC_035307	XLOC_035307	-	-	chr7:82790729-82790923	ENSBTAG00000040118	-	Uncharacterized protein [Source:UniProtKB/TrEMBL;Acc:E1BMY6]	GO:0045095(keratin filament);GO:0005882(intermediate filament)	NA	OK	25.9589	0	inf	up	0.00185	yes
XLOC_009472	XLOC_009472	-	-	chr15:53504401-53504597	ENSBTAG00000040118	-	Uncharacterized protein [Source:UniProtKB/TrEMBL;Acc:E1BMY6]	GO:0045095(keratin filament);GO:0005882(intermediate filament)	NA	OK	27.8563	0	inf	up	0.00375	yes
XLOC_014979	XLOC_014979	ENSBTAT00000062289	SNORD10	chr19:27915410-27921421	ENSBTAG00000044856	SNORD10	Small nucleolar RNA SNORD10 [Source:RFAM;Acc:RF01290]	NA	NA	OK	83.8864	0	inf	up	0.0144	yes
XLOC_011447	XLOC_011447	-	-	chr16:28093346-28093496	ENSBTAG00000040118	-	Uncharacterized protein [Source:UniProtKB/TrEMBL;Acc:E1BMY6]	GO:0045095(keratin filament);GO:0005882(intermediate filament)	NA	OK	84.2739	0	inf	up	0.01525	yes
XLOC_037505	XLOC_037505	-	-	chr8:53584754-53584893	ENSBTAG00000040118	-	Uncharacterized protein [Source:UniProtKB/TrEMBL;Acc:E1BMY6]	GO:0045095(keratin filament);GO:0005882(intermediate filament)	NA	OK	0	392.649	-inf	down	0.0049	yes
XLOC_026619	XLOC_026619	-	-	chr29:44296100-44296243	ENSBTAG00000040118	-	Uncharacterized protein [Source:UniProtKB/TrEMBL;Acc:E1BMY6]	GO:0045095(keratin filament);GO:0005882(intermediate filament)	NA	OK	0	227.059	-inf	down	0.0049	yes
XLOC_032317	XLOC_032317	-	-	chr5:44232607-44232756	ENSBTAG00000040118	-	Uncharacterized protein [Source:UniProtKB/TrEMBL;Acc:E1BMY6]	GO:0045095(keratin filament);GO:0005882(intermediate filament)	NA	OK	0	177.982	-inf	down	0.0049	yes
XLOC_023796	XLOC_023796	ENSBTAT00000059680	SNORA64	chr25:1520492-1522670	ENSBTAG00000042688	SNORA64	Small nucleolar RNA SNORA64/SNORA10 family [Source:RFAM;Acc:RF00264]	NA	NA	OK	0	136.972	-inf	down	0.003	yes
XLOC_020239	XLOC_020239	-	-	chr21:61615875-61616020	ENSBTAG00000040118	-	Uncharacterized protein [Source:UniProtKB/TrEMBL;Acc:E1BMY6]	GO:0045095(keratin filament);GO:0005882(intermediate filament)	NA	OK	0	120.9	-inf	down	0.037	yes
XLOC_039162	XLOC_039162	ENSBTAT00000059485	SNORA70	chrX:40364801-40367164	ENSBTAG00000042321	SNORA70	Small nucleolar RNA SNORA70 [Source:RFAM;Acc:RF00156]	NA	NA	OK	0	111.56	-inf	down	0.0251	yes
XLOC_014902	XLOC_014902	-	-	chr19:24314031-24352962	ENSBTAG00000040118	-	Uncharacterized protein [Source:UniProtKB/TrEMBL;Acc:E1BMY6]	GO:0045095(keratin filament);GO:0005882(intermediate filament)	NA	OK	0	76.6117	-inf	down	0.0049	yes
XLOC_007216	XLOC_007216	-	-	chr13:11201562-11201742	ENSBTAG00000040118	-	Uncharacterized protein [Source:UniProtKB/TrEMBL;Acc:E1BMY6]	GO:0045095(keratin filament);GO:0005882(intermediate filament)	NA	OK	0	24.5738	-inf	down	0.015	yes
XLOC_040233	XLOC_040233	-	-	chrX:96798257-96798428	ENSBTAG00000040118	-	Uncharacterized protein [Source:UniProtKB/TrEMBL;Acc:E1BMY6]	GO:0045095(keratin filament);GO:0005882(intermediate filament)	NA	OK	0	24.1492	-inf	down	0.037	yes
XLOC_019028	XLOC_019028	-	-	chr20:62603603-62603782	ENSBTAG00000040118	-	Uncharacterized protein [Source:UniProtKB/TrEMBL;Acc:E1BMY6]	GO:0045095(keratin filament);GO:0005882(intermediate filament)	NA	OK	0	23.0628	-inf	down	0.015	yes
XLOC_027646	XLOC_027646	-	-	chr3:20167760-20167952	ENSBTAG00000040118	-	Uncharacterized protein [Source:UniProtKB/TrEMBL;Acc:E1BMY6]	GO:0045095(keratin filament);GO:0005882(intermediate filament)	NA	OK	0	21.0428	-inf	down	0.0091	yes
XLOC_029084	XLOC_029084	-	-	chr3:66960758-66960979	ENSBTAG00000040118	-	Uncharacterized protein [Source:UniProtKB/TrEMBL;Acc:E1BMY6]	GO:0045095(keratin filament);GO:0005882(intermediate filament)	NA	OK	0	14.7178	-inf	down	0.00255	yes
XLOC_007713	XLOC_007713	-	-	chr13:78400922-78401169	ENSBTAG00000040118	-	Uncharacterized protein [Source:UniProtKB/TrEMBL;Acc:E1BMY6]	GO:0045095(keratin filament);GO:0005882(intermediate filament)	NA	OK	0	13.8253	-inf	down	0.0008	yes
XLOC_040325	XLOC_040325	-	-	chrX:118864033-118864250	ENSBTAG00000040118	-	Uncharacterized protein [Source:UniProtKB/TrEMBL;Acc:E1BMY6]	GO:0045095(keratin filament);GO:0005882(intermediate filament)	NA	OK	0	11.9406	-inf	down	0.0091	yes
XLOC_010960	XLOC_010960	-	-	chr16:52594299-52594502	ENSBTAG00000040118	-	Uncharacterized protein [Source:UniProtKB/TrEMBL;Acc:E1BMY6]	GO:0045095(keratin filament);GO:0005882(intermediate filament)	NA	OK	0	11.8371	-inf	down	0.037	yes

## Sheet: 8h vs 0h differential mRNAs
	Supplementary Table 2B：The differentially expressed mRNAs in LPS induced 8h bMECs.
test_id	gene_id	nearest_ref_id	gene	locus	gene_id	symbol	Annotation	GO_term	KEGG	status	bMEC_Lps_8h_fpkm	bMEC_Lps_0h_fpkm	log2(fold_change)	Up/down regulated	p_value	significant
XLOC_025349	XLOC_025349	ENSBTAT00000047341	C27H8orf4	chr27:34893818-34895119	ENSBTAG00000033304	C27H8orf4	Bos taurus chromosome 27 open reading frame, human C8orf4 (C27H8orf4), mRNA. [Source:RefSeq mRNA;Acc:NM_001035490]	GO:0006915(apoptotic process)	NA	OK	7.83904	81.4279	-3.37677	down	5e-05	yes
XLOC_032441	XLOC_032441	ENSBTAT00000008663	INHBE	chr5:56332209-56335907	ENSBTAG00000006599	INHBE	Bos taurus inhibin, beta E (INHBE), mRNA. [Source:RefSeq mRNA;Acc:NM_001205842]	GO:0040007(growth);GO:0005179(hormone activity);GO:0008083(growth factor activity);GO:0005576(extracellular region)	04350(TGF-beta signaling pathway)	OK	27.859	275.905	-3.30796	down	5e-05	yes
XLOC_007551	XLOC_007551	ENSBTAT00000022616	TRIB3	chr13:61175908-61187528	ENSBTAG00000017007	TRIB3	Bos taurus tribbles homolog 3 (Drosophila) (TRIB3), mRNA. [Source:RefSeq mRNA;Acc:NM_001076103]	GO:0070059(intrinsic apoptotic signaling pathway in response to endoplasmic reticulum stress);GO:0004860(protein kinase inhibitor activity);GO:0034976(response to endoplasmic reticulum stress);GO:0003714(transcription corepressor activity);GO:0006915(apoptotic process);GO:0016772(transferase activity, transferring phosphorus-containing groups);GO:0006468(protein phosphorylation);GO:0004672(protei…	NA	OK	6.03846	55.8849	-3.21021	down	5e-05	yes
XLOC_012051	XLOC_012051	-	-	chr17:19812888-19816119	ENSBTAG00000040118	-	Uncharacterized protein [Source:UniProtKB/TrEMBL;Acc:E1BMY6]	GO:0045095(keratin filament);GO:0005882(intermediate filament)	NA	OK	1.32942	12.2035	-3.19844	down	5e-05	yes
XLOC_030341	XLOC_030341	-	-	chr4:31738162-31738664	ENSBTAG00000040118	-	Uncharacterized protein [Source:UniProtKB/TrEMBL;Acc:E1BMY6]	GO:0045095(keratin filament);GO:0005882(intermediate filament)	NA	OK	1.94346	17.5205	-3.17234	down	0.0047	yes
XLOC_024429	XLOC_024429	ENSBTAT00000010367;ENSBTAT00000010366	IFIT1	chr26:11103950-11111090	ENSBTAG00000007881	IFIT1	interferon-induced protein with tetratricopeptide repeats 1 [Source:HGNC Symbol;Acc:HGNC:5407]	GO:0005515(protein binding);GO:0071357(cellular response to type I interferon);GO:0050689(negative regulation of defense response to virus by host);GO:0019060(intracellular transport of viral protein in host cell);GO:0051097(negative regulation of helicase activity);GO:0071360(cellular response to exogenous dsRNA);GO:0032091(negative regulation of protein binding);GO:0045070(positive regulation o…	NA	OK	6.86544	57.7401	-3.07215	down	5e-05	yes
XLOC_013746	XLOC_013746	ENSBTAT00000063946	IL11	chr18:62560970-62565324	ENSBTAG00000047400	IL11	interleukin 11 [Source:HGNC Symbol;Acc:HGNC:5966]	GO:0005142(interleukin-11 receptor binding);GO:0005125(cytokine activity);GO:0008284(positive regulation of cell proliferation);GO:0005737(cytoplasm);GO:0046888(negative regulation of hormone secretion);GO:0050731(positive regulation of peptidyl-tyrosine phosphorylation);GO:0033138(positive regulation of peptidyl-serine phosphorylation);GO:0043410(positive regulation of MAPK cascade);GO:0045944(p…	NA	OK	7.7124	46.9241	-2.60508	down	5e-05	yes
XLOC_004197	XLOC_004197	-	-	chr11:28575920-28576215	ENSBTAG00000040118	-	Uncharacterized protein [Source:UniProtKB/TrEMBL;Acc:E1BMY6]	GO:0045095(keratin filament);GO:0005882(intermediate filament)	NA	OK	6.57444	38.8532	-2.56309	down	0.0193	yes
XLOC_029649	XLOC_029649	ENSBTAT00000021310	KLHL7	chr4:31900914-31956645	ENSBTAG00000016010	KLHL7	Bos taurus kelch-like 7 (Drosophila) (KLHL7), mRNA. [Source:RefSeq mRNA;Acc:NM_001076037]	GO:0005515(protein binding);GO:0031463(Cul3-RING ubiquitin ligase complex);GO:0042803(protein homodimerization activity);GO:0005654(nucleoplasm);GO:0005730(nucleolus);GO:0005886(plasma membrane);GO:0005737(cytoplasm);GO:0005634(nucleus)	NA	OK	3.34705	19.4011	-2.53518	down	5e-05	yes
XLOC_012050	XLOC_012050	-	-	chr17:19812208-19812724	ENSBTAG00000040118	-	Uncharacterized protein [Source:UniProtKB/TrEMBL;Acc:E1BMY6]	GO:0045095(keratin filament);GO:0005882(intermediate filament)	NA	OK	1.80008	10.4079	-2.53155	down	0.01215	yes
XLOC_024227	XLOC_024227	ENSBTAT00000063483	ENSBTAG00000047379	chr25:37125205-37175162	ENSBTAG00000047379	-	Bos taurus cytochrome P450, subfamily IIIA, polypeptide 4 (CYP3A4), mRNA. [Source:RefSeq mRNA;Acc:NM_001099367]	GO:0016712(oxidoreductase activity, acting on paired donors, with incorporation or reduction of molecular oxygen, reduced flavin or flavoprotein as one donor, and incorporation of one atom of oxygen);GO:0016705(oxidoreductase activity, acting on paired donors, with incorporation or reduction of molecular oxygen);GO:0004497(monooxygenase activity);GO:0020037(heme binding);GO:0005506(iron ion bindi…	00140(Steroid hormone biosynthesis);00591(Linoleic acid metabolism);00830(Retinol metabolism);00980(Metabolism of xenobiotics by cytochrome P450);00982(Drug metabolism - cytochrome P450);00983(Drug metabolism - other enzymes)	OK	2.0683	11.7583	-2.50717	down	5e-05	yes
XLOC_002438	XLOC_002438	ENSBTAT00000013689	CHAC1	chr10:36598393-36600764	ENSBTAG00000010371	CHAC1	Bos taurus ChaC, cation transport regulator homolog 1 (E. coli) (CHAC1), mRNA. [Source:RefSeq mRNA;Acc:NM_001098882]	GO:0005112(Notch binding);GO:0022008(neurogenesis);GO:0005802(trans-Golgi network);GO:0010955(negative regulation of protein processing);GO:0045746(negative regulation of Notch signaling pathway);GO:0070059(intrinsic apoptotic signaling pathway in response to endoplasmic reticulum stress);GO:0005515(protein binding);GO:0005829(cytosol)	NA	OK	4.82961	26.7235	-2.46813	down	5e-05	yes
XLOC_026607	XLOC_026607	-	-	chr29:44284521-44284734	ENSBTAG00000040118	-	Uncharacterized protein [Source:UniProtKB/TrEMBL;Acc:E1BMY6]	GO:0045095(keratin filament);GO:0005882(intermediate filament)	NA	OK	19.6288	106.252	-2.43645	down	0.02215	yes
XLOC_022427	XLOC_022427	ENSBTAT00000002357	SYT4	chr24:12950355-12960313	ENSBTAG00000001801	SYT4	Bos taurus synaptotagmin IV (SYT4), mRNA. [Source:RefSeq mRNA;Acc:NM_001098108]	GO:0005515(protein binding);GO:0006887(exocytosis);GO:0008021(synaptic vesicle);GO:0005215(transporter activity);GO:0006810(transport);GO:0007269(neurotransmitter secretion);GO:0043005(neuron projection);GO:0048471(perinuclear region of cytoplasm);GO:0005509(calcium ion binding);GO:0016020(membrane);GO:0043231(intracellular membrane-bounded organelle);GO:0005886(plasma membrane)	NA	OK	5.82877	29.529	-2.34087	down	5e-05	yes
XLOC_014546	XLOC_014546	-	-	chr18:62550281-62551896	ENSBTAG00000040118	-	Uncharacterized protein [Source:UniProtKB/TrEMBL;Acc:E1BMY6]	GO:0045095(keratin filament);GO:0005882(intermediate filament)	NA	OK	2.27744	11.5216	-2.33886	down	0.0234	yes
XLOC_016792	XLOC_016792	-	-	chr2:34167098-34167634	ENSBTAG00000040118	-	Uncharacterized protein [Source:UniProtKB/TrEMBL;Acc:E1BMY6]	GO:0045095(keratin filament);GO:0005882(intermediate filament)	NA	OK	2.55499	12.828	-2.3279	down	0.0069	yes
XLOC_032575	XLOC_032575	-	-	chr5:68879800-68880198	ENSBTAG00000040118	-	Uncharacterized protein [Source:UniProtKB/TrEMBL;Acc:E1BMY6]	GO:0045095(keratin filament);GO:0005882(intermediate filament)	NA	OK	4.36261	21.1407	-2.27676	down	0.00695	yes
XLOC_026615	XLOC_026615	-	-	chr29:44292809-44293144	ENSBTAG00000040118	-	Uncharacterized protein [Source:UniProtKB/TrEMBL;Acc:E1BMY6]	GO:0045095(keratin filament);GO:0005882(intermediate filament)	NA	OK	12.5357	60.1069	-2.26149	down	0.00265	yes
XLOC_018104	XLOC_018104	ENSBTAT00000042886;ENSBTAT00000063922	SESN2	chr2:125696402-125714186	ENSBTAG00000002363	SESN2	Bos taurus sestrin 2 (SESN2), mRNA. [Source:RefSeq mRNA;Acc:NM_001024507]	GO:1901031(regulation of response to reactive oxygen species);GO:0005634(nucleus);GO:2000479(regulation of cAMP-dependent protein kinase activity);GO:0090526(regulation of gluconeogenesis involved in cellular glucose homeostasis);GO:0032042(mitochondrial DNA metabolic process);GO:0070328(triglyceride homeostasis);GO:0046323(glucose import);GO:0001932(regulation of protein phosphorylation);GO:0009…	04115(p53 signaling pathway)	OK	10.5108	49.3786	-2.23201	down	5e-05	yes
XLOC_009805	XLOC_009805	ENSBTAT00000003767;ENSBTAT00000054469	FAM111B	chr15:83568473-83582435	ENSBTAG00000036016	FAM111B	family with sequence similarity 111, member B [Source:HGNC Symbol;Acc:HGNC:24200]	GO:0008152(metabolic process);GO:0003824(catalytic activity)	NA	OK	6.07082	27.5786	-2.18358	down	5e-05	yes
XLOC_009600	XLOC_009600	-	-	chr15:76669355-76680988	ENSBTAG00000040118	-	Uncharacterized protein [Source:UniProtKB/TrEMBL;Acc:E1BMY6]	GO:0045095(keratin filament);GO:0005882(intermediate filament)	NA	OK	3.60181	16.2741	-2.17578	down	0.018	yes
XLOC_026620	XLOC_026620	-	-	chr29:44296385-44296695	ENSBTAG00000040118	-	Uncharacterized protein [Source:UniProtKB/TrEMBL;Acc:E1BMY6]	GO:0045095(keratin filament);GO:0005882(intermediate filament)	NA	OK	4.25752	18.5651	-2.12451	down	0.0496	yes
XLOC_004348	XLOC_004348	ENSBTAT00000010206	SLC1A4	chr11:63290421-63395507	ENSBTAG00000007763	SLC1A4	Bos taurus solute carrier family 1 (glutamate/neutral amino acid transporter), member 4 (SLC1A4), mRNA. [Source:RefSeq mRNA;Acc:NM_001081577]	GO:0042470(melanosome);GO:0017153(sodium:dicarboxylate symporter activity);GO:0006835(dicarboxylic acid transport);GO:0015293(symporter activity);GO:0006810(transport);GO:0016021(integral component of membrane);GO:0015175(neutral amino acid transmembrane transporter activity);GO:0005882(intermediate filament);GO:0016020(membrane);GO:0035524(proline transmembrane transport);GO:0034590(L-hydroxypro…	NA	OK	10.6825	46.3517	-2.11737	down	0.0003	yes
XLOC_036274	XLOC_036274	ENSBTAT00000028590	ST8SIA4	chr7:102452980-102556182	ENSBTAG00000021445	ST8SIA4	ST8 alpha-N-acetyl-neuraminide alpha-2,8-sialyltransferase 4 [Source:HGNC Symbol;Acc:HGNC:10871]	GO:0097503(sialylation);GO:0008373(sialyltransferase activity);GO:0030173(integral component of Golgi membrane);GO:0006486(protein glycosylation);GO:0016757(transferase activity, transferring glycosyl groups);GO:0016740(transferase activity);GO:0005794(Golgi apparatus);GO:0016021(integral component of membrane);GO:0003828(alpha-N-acetylneuraminate alpha-2,8-sialyltransferase activity);GO:0016020(…	NA	OK	3.73941	15.9394	-2.09171	down	0.0007	yes
XLOC_026609	XLOC_026609	-	-	chr29:44287169-44287888	ENSBTAG00000040118	-	Uncharacterized protein [Source:UniProtKB/TrEMBL;Acc:E1BMY6]	GO:0045095(keratin filament);GO:0005882(intermediate filament)	NA	OK	3.08535	13.0639	-2.08208	down	0.0037	yes
XLOC_031933	XLOC_031933	-	-	chr5:114593435-114593878	ENSBTAG00000040118	-	Uncharacterized protein [Source:UniProtKB/TrEMBL;Acc:E1BMY6]	GO:0045095(keratin filament);GO:0005882(intermediate filament)	NA	OK	3.05198	12.7706	-2.06501	down	0.01935	yes
XLOC_017904	XLOC_017904	ENSBTAT00000009285	IGFBP5	chr2:105378990-105397707	ENSBTAG00000007062	IGFBP5	Bos taurus insulin-like growth factor binding protein 5 (IGFBP5), mRNA. [Source:RefSeq mRNA;Acc:NM_001105327]	GO:0019838(growth factor binding);GO:0005520(insulin-like growth factor binding);GO:0001558(regulation of cell growth);GO:0001968(fibronectin binding);GO:0043569(negative regulation of insulin-like growth factor receptor signaling pathway);GO:0044342(type B pancreatic cell proliferation);GO:0060056(mammary gland involution);GO:0051146(striated muscle cell differentiation);GO:0040008(regulation of…	NA	OK	3.00873	12.2829	-2.02942	down	0.003	yes
XLOC_014547	XLOC_014547	ENSBTAT00000028044	TMEM190	chr18:62554621-62557112	ENSBTAG00000021057	TMEM190	Bos taurus transmembrane protein 190 (TMEM190), mRNA. [Source:RefSeq mRNA;Acc:NM_001205559]	GO:0016021(integral component of membrane);GO:0002079(inner acrosomal membrane);GO:0043621(protein self-association);GO:0002244(hematopoietic progenitor cell differentiation);GO:0016020(membrane);GO:0005634(nucleus)	NA	OK	29.6875	120.218	-2.01772	down	0.00045	yes
XLOC_032758	XLOC_032758	-	-	chr5:84092363-84093737	ENSBTAG00000040118	-	Uncharacterized protein [Source:UniProtKB/TrEMBL;Acc:E1BMY6]	GO:0045095(keratin filament);GO:0005882(intermediate filament)	NA	OK	3.05463	12.1387	-1.99054	down	0.0016	yes
XLOC_029112	XLOC_029112	ENSBTAT00000063885;ENSBTAT00000019679	CTH	chr3:75082358-75109443	ENSBTAG00000014791	CTH	Bos taurus cystathionase (cystathionine gamma-lyase) (CTH), mRNA. [Source:RefSeq mRNA;Acc:NM_001024567]	GO:0030170(pyridoxal phosphate binding);GO:0009058(biosynthetic process);GO:0008152(metabolic process);GO:0003824(catalytic activity);GO:0044540(L-cystine L-cysteine-lyase (deaminating));GO:0044524(protein sulfhydration);GO:0043123(positive regulation of I-kappaB kinase/NF-kappaB signaling);GO:0051092(positive regulation of NF-kappaB transcription factor activity);GO:2001234(negative regulation o…	00260(Glycine, serine and threonine metabolism);00260(Glycine, serine and threonine metabolism);00270(Cysteine and methionine metabolism);00270(Cysteine and methionine metabolism);00450(Selenoamino acid metabolism);00450(Selenoamino acid metabolism);00910(Nitrogen metabolism);00910(Nitrogen metabolism)	OK	23.6989	94.0857	-1.98915	down	0.0001	yes
XLOC_008188	XLOC_008188	ENSBTAT00000009992	GEM	chr14:72385681-72399660	ENSBTAG00000007596	GEM	Bos taurus GTP binding protein overexpressed in skeletal muscle (GEM), transcript variant 1, mRNA. [Source:RefSeq mRNA;Acc:NM_001083732]	GO:0006184(GTP catabolic process);GO:0007264(small GTPase mediated signal transduction);GO:0005525(GTP binding);GO:0007165(signal transduction);GO:0005622(intracellular);GO:0015031(protein transport);GO:0000166(nucleotide binding);GO:0005515(protein binding);GO:0005634(nucleus);GO:0016020(membrane);GO:0051310(metaphase plate congression);GO:0072686(mitotic spindle);GO:0051233(spindle midzone);GO:…	NA	OK	3.86531	15.3155	-1.98634	down	0.0003	yes
XLOC_026614	XLOC_026614	-	-	chr29:44291293-44292676	ENSBTAG00000040118	-	Uncharacterized protein [Source:UniProtKB/TrEMBL;Acc:E1BMY6]	GO:0045095(keratin filament);GO:0005882(intermediate filament)	NA	OK	3.84691	15.0901	-1.97183	down	0.0016	yes
XLOC_011796	XLOC_011796	ENSBTAT00000010525;ENSBTAT00000063771	NCF2	chr16:66081121-66128113	ENSBTAG00000008004	NCF2	neutrophil cytosolic factor 2 [Source:HGNC Symbol;Acc:HGNC:7661]	GO:0005515(protein binding);GO:0048365(Rac GTPase binding);GO:0042554(superoxide anion generation);GO:0001669(acrosomal vesicle);GO:0005737(cytoplasm);GO:0005730(nucleolus);GO:0008022(protein C-terminus binding)	04145(Phagosome);04670(Leukocyte transendothelial migration);05140(Leishmaniasis)	OK	4.4779	17.5608	-1.97147	down	0.0005	yes
XLOC_007319	XLOC_007319	ENSBTAT00000011456	SLC6A9	chr13:38064362-38161610	ENSBTAG00000006043	SLC6A9	Bos taurus solute carrier family 6 (neurotransmitter transporter, glycine), member 9 (SLC6A9), mRNA. [Source:RefSeq mRNA;Acc:NM_001102032]	GO:0015849(organic acid transport);GO:0005283(sodium:amino acid symporter activity);GO:0003333(amino acid transmembrane transport);GO:0015293(symporter activity);GO:0006836(neurotransmitter transport);GO:0005887(integral component of plasma membrane);GO:0005328(neurotransmitter:sodium symporter activity);GO:0055085(transmembrane transport);GO:0006810(transport);GO:0016021(integral component of me…	NA	OK	17.5573	66.6836	-1.92526	down	0.00035	yes
XLOC_013747	XLOC_013747	ENSBTAT00000061400;ENSBTAT00000064126;ENSBTAT00000009474	COX6B2,ENSBTAG00000044157	chr18:62566819-62574837	NA	NA	NA	NA	NA	OK	3.14379	11.7514	-1.90226	down	0.0068	yes
XLOC_013443	XLOC_013443	ENSBTAT00000006244;ENSBTAT00000065855;ENSBTAT00000063872	LTBP4	chr18:50173223-50202361	ENSBTAG00000004757	LTBP4	latent transforming growth factor beta binding protein 4 [Source:HGNC Symbol;Acc:HGNC:6717]	GO:0005515(protein binding);GO:0005509(calcium ion binding);GO:0046879(hormone secretion);GO:0007179(transforming growth factor beta receptor signaling pathway);GO:0050431(transforming growth factor beta binding);GO:0030162(regulation of proteolysis);GO:0070062(extracellular vesicular exosome);GO:0031012(extracellular matrix);GO:0005578(proteinaceous extracellular matrix);GO:0005615(extracellular…	NA	OK	3.38249	12.5651	-1.89326	down	0.00015	yes
XLOC_012188	XLOC_012188	ENSBTAT00000011801	ACAD10	chr17:57648596-57697403	ENSBTAG00000001164	ACAD10	acyl-CoA dehydrogenase family, member 10 [Source:HGNC Symbol;Acc:HGNC:21597]	GO:0016627(oxidoreductase activity, acting on the CH-CH group of donors);GO:0003995(acyl-CoA dehydrogenase activity);GO:0050660(flavin adenine dinucleotide binding);GO:0055114(oxidation-reduction process);GO:0016772(transferase activity, transferring phosphorus-containing groups);GO:0016787(hydrolase activity);GO:0008152(metabolic process)	NA	OK	5.04154	18.6552	-1.88764	down	0.00025	yes
XLOC_033741	XLOC_033741	ENSBTAT00000064893;ENSBTAT00000001500	BMP2K	chr6:95348688-95441932	ENSBTAG00000001126	BMP2K	Uncharacterized protein [Source:UniProtKB/TrEMBL;Acc:F1MUI8]	GO:0016772(transferase activity, transferring phosphorus-containing groups);GO:0016310(phosphorylation);GO:0016301(kinase activity);GO:0008152(metabolic process);GO:0030500(regulation of bone mineralization);GO:0019208(phosphatase regulator activity);GO:0050790(regulation of catalytic activity);GO:0004672(protein kinase activity);GO:0005634(nucleus);GO:0005654(nucleoplasm)	NA	OK	14.3444	52.7799	-1.8795	down	0.0044	yes
XLOC_011176	XLOC_011176	ENSBTAT00000014489	SLC30A1	chr16:73764787-73771913	ENSBTAG00000010909	SLC30A1	Bos taurus solute carrier family 30 (zinc transporter), member 1 (SLC30A1), mRNA. [Source:RefSeq mRNA;Acc:NM_001205893]	GO:0008324(cation transmembrane transporter activity);GO:0055085(transmembrane transport);GO:0016021(integral component of membrane);GO:0006812(cation transport);GO:0071584(negative regulation of zinc ion transmembrane import);GO:0090281(negative regulation of calcium ion import);GO:0019855(calcium channel inhibitor activity);GO:0006829(zinc ion transport);GO:0006882(cellular zinc ion homeostasis…	NA	OK	9.52971	35.0577	-1.87923	down	0.001	yes
XLOC_022013	XLOC_022013	ENSBTAT00000007903	GTPBP2	chr23:17117322-17126857	ENSBTAG00000006016	GTPBP2	Bos taurus GTP binding protein 2 (GTPBP2), mRNA. [Source:RefSeq mRNA;Acc:NM_001083421]	GO:0003924(GTPase activity);GO:0006184(GTP catabolic process);GO:0005525(GTP binding);GO:0000166(nucleotide binding);GO:0043231(intracellular membrane-bounded organelle);GO:0005515(protein binding)	NA	OK	11.0832	40.743	-1.87818	down	0.0001	yes
XLOC_030342	XLOC_030342	ENSBTAT00000006008	FAM126A	chr4:31738766-31825459	ENSBTAG00000004575	FAM126A	family with sequence similarity 126, member A [Source:HGNC Symbol;Acc:HGNC:24587]	GO:0005886(plasma membrane);GO:0005737(cytoplasm)	NA	OK	7.61976	27.8715	-1.87097	down	0.00025	yes
XLOC_017474	XLOC_017474	-	-	chr2:136770175-136770461	ENSBTAG00000040118	-	Uncharacterized protein [Source:UniProtKB/TrEMBL;Acc:E1BMY6]	GO:0045095(keratin filament);GO:0005882(intermediate filament)	NA	OK	6.8313	24.7827	-1.8591	down	0.04085	yes
XLOC_004912	XLOC_004912	ENSBTAT00000006419	MTHFD2	chr11:10407372-10431047	ENSBTAG00000004881	MTHFD2	Bos taurus methylenetetrahydrofolate dehydrogenase (NADP+ dependent) 2, methenyltetrahydrofolate cyclohydrolase (MTHFD2), mRNA. [Source:RefSeq mRNA;Acc:NM_001075755]	GO:0009396(folic acid-containing compound biosynthetic process);GO:0006730(one-carbon metabolic process);GO:0004488(methylenetetrahydrofolate dehydrogenase (NADP+) activity);GO:0004477(methenyltetrahydrofolate cyclohydrolase activity);GO:0055114(oxidation-reduction process);GO:0016491(oxidoreductase activity);GO:0005739(mitochondrion);GO:0016787(hydrolase activity);GO:0008152(metabolic process);G…	00670(One carbon pool by folate)	OK	10.7775	38.7276	-1.84534	down	0.00025	yes
XLOC_026690	XLOC_026690	ENSBTAT00000023529	CARNS1	chr29:45957523-45964420	ENSBTAG00000017690	CARNS1	carnosine synthase 1 [Source:HGNC Symbol;Acc:HGNC:29268]	GO:0046872(metal ion binding);GO:0005524(ATP binding);GO:0047730(carnosine synthase activity);GO:0035499(carnosine biosynthetic process);GO:0016887(ATPase activity)	NA	OK	3.51172	12.4468	-1.82552	down	0.0008	yes
XLOC_009432	XLOC_009432	-	-	chr15:50845174-50845625	ENSBTAG00000040118	-	Uncharacterized protein [Source:UniProtKB/TrEMBL;Acc:E1BMY6]	GO:0045095(keratin filament);GO:0005882(intermediate filament)	NA	OK	20.2788	71.4449	-1.81686	down	0.00355	yes
XLOC_022083	XLOC_022083	ENSBTAT00000059981	SNORD52	chr23:27324094-27326211	ENSBTAG00000042163	SNORD52	Small nucleolar RNA SNORD52 [Source:RFAM;Acc:RF00276]	NA	NA	OK	14.9241	52.2966	-1.80907	down	0.0007	yes
XLOC_016326	XLOC_016326	ENSBTAT00000061581;ENSBTAT00000038317	HDAC5	chr19:44538238-44575554	ENSBTAG00000016254	HDAC5	histone deacetylase 5 [Source:HGNC Symbol;Acc:HGNC:14068]	GO:0004407(histone deacetylase activity);GO:0016568(chromatin modification);GO:0016787(hydrolase activity);GO:0051153(regulation of striated muscle cell differentiation);GO:0048742(regulation of skeletal muscle fiber development);GO:0042220(response to cocaine);GO:0033555(multicellular organismal response to stress);GO:0002076(osteoblast development);GO:0016604(nuclear body);GO:0003714(transcript…	NA	OK	10.2093	35.7688	-1.80881	down	0.0001	yes
XLOC_034813	XLOC_034813	ENSBTAT00000024029	MKNK2	chr7:22787204-22796782	ENSBTAG00000018049	MKNK2	MAP kinase interacting serine/threonine kinase 2 [Source:HGNC Symbol;Acc:HGNC:7111]	GO:0009103(lipopolysaccharide biosynthetic process);GO:0016773(phosphotransferase activity, alcohol group as acceptor);GO:0004713(protein tyrosine kinase activity);GO:0016772(transferase activity, transferring phosphorus-containing groups);GO:0006468(protein phosphorylation);GO:0004674(protein serine/threonine kinase activity);GO:0004672(protein kinase activity);GO:0005524(ATP binding);GO:0000166…	04010(MAPK signaling pathway);04910(Insulin signaling pathway)	OK	24.6054	85.6378	-1.79927	down	0.00015	yes
XLOC_011500	XLOC_011500	ENSBTAT00000034160	KMO	chr16:35975057-36045361	ENSBTAG00000014439	KMO	Bos taurus kynurenine 3-monooxygenase (kynurenine 3-hydroxylase) (KMO), mRNA. [Source:RefSeq mRNA;Acc:NM_001243298]	GO:0019363(pyridine nucleotide biosynthetic process);GO:0009435(NAD biosynthetic process);GO:0005741(mitochondrial outer membrane);GO:0004497(monooxygenase activity);GO:0050660(flavin adenine dinucleotide binding);GO:0031966(mitochondrial membrane);GO:0055114(oxidation-reduction process);GO:0016491(oxidoreductase activity);GO:0005739(mitochondrion);GO:0016021(integral component of membrane);GO:00…	NA	OK	3.26091	11.2621	-1.78813	down	0.00225	yes
XLOC_037085	XLOC_037085	ENSBTAT00000023618	NFIL3	chr8:87878454-87893182	ENSBTAG00000017763	NFIL3	Bos taurus nuclear factor, interleukin 3 regulated (NFIL3), mRNA. [Source:RefSeq mRNA;Acc:NM_001075240]	GO:0043565(sequence-specific DNA binding);GO:0006366(transcription from RNA polymerase II promoter);GO:0006351(transcription, DNA-templated);GO:0003700(sequence-specific DNA binding transcription factor activity);GO:0003677(DNA binding);GO:0006355(regulation of transcription, DNA-templated);GO:0005634(nucleus);GO:0071353(cellular response to interleukin-4);GO:0010628(positive regulation of gene e…	NA	OK	19.1987	65.9165	-1.77963	down	0.00015	yes
XLOC_035668	XLOC_035668	ENSBTAT00000010781	EPOR	chr7:16998290-17003804	ENSBTAG00000008197	EPOR	erythropoietin receptor [Source:HGNC Symbol;Acc:HGNC:3416]	GO:0004896(cytokine receptor activity);GO:0005515(protein binding);GO:0004888(transmembrane signaling receptor activity);GO:0016021(integral component of membrane);GO:0046697(decidualization);GO:0007507(heart development);GO:0007165(signal transduction);GO:0007420(brain development);GO:0004900(erythropoietin receptor activity);GO:0038162(erythropoietin-mediated signaling pathway);GO:0042802(ident…	04060(Cytokine-cytokine receptor interaction);04630(Jak-STAT signaling pathway);04640(Hematopoietic cell lineage)	OK	2.96332	10.1552	-1.77693	down	0.005	yes
XLOC_026608	XLOC_026608	-	-	chr29:44285003-44286049	ENSBTAG00000040118	-	Uncharacterized protein [Source:UniProtKB/TrEMBL;Acc:E1BMY6]	GO:0045095(keratin filament);GO:0005882(intermediate filament)	NA	OK	3.09641	10.5922	-1.77434	down	0.00965	yes
XLOC_026613	XLOC_026613	-	-	chr29:44289551-44290831	ENSBTAG00000040118	-	Uncharacterized protein [Source:UniProtKB/TrEMBL;Acc:E1BMY6]	GO:0045095(keratin filament);GO:0005882(intermediate filament)	NA	OK	5.38182	18.3809	-1.77204	down	0.003	yes
XLOC_006656	XLOC_006656	-	-	chr13:32517139-32517552	ENSBTAG00000040118	-	Uncharacterized protein [Source:UniProtKB/TrEMBL;Acc:E1BMY6]	GO:0045095(keratin filament);GO:0005882(intermediate filament)	NA	OK	9.49416	32.0939	-1.75719	down	0.0103	yes
XLOC_036827	XLOC_036827	ENSBTAT00000018554	PSAT1	chr8:54501517-54529786	ENSBTAG00000013960	PSAT1	Bos taurus phosphoserine aminotransferase 1 (PSAT1), mRNA. [Source:RefSeq mRNA;Acc:NM_001102150]	GO:0006564(L-serine biosynthetic process);GO:0004648(O-phospho-L-serine:2-oxoglutarate aminotransferase activity);GO:0008652(cellular amino acid biosynthetic process);GO:0030170(pyridoxal phosphate binding);GO:0016740(transferase activity);GO:0008483(transaminase activity);GO:0008152(metabolic process);GO:0003824(catalytic activity);GO:0070062(extracellular vesicular exosome);GO:0005737(cytoplasm)	00260(Glycine, serine and threonine metabolism);00750(Vitamin B6 metabolism)	OK	154.133	517.488	-1.74735	down	0.0001	yes
XLOC_011829	XLOC_011829	ENSBTAT00000033913	CENPF	chr16:70438919-70501669	ENSBTAG00000024449	CENPF	centromere protein F, 350/400kDa [Source:HGNC Symbol;Acc:HGNC:1857]	GO:0008134(transcription factor binding);GO:0045502(dynein binding);GO:0042803(protein homodimerization activity);GO:0016192(vesicle-mediated transport);GO:0045120(pronucleus);GO:0016202(regulation of striated muscle tissue development);GO:0005634(nucleus);GO:0016020(membrane);GO:0051310(metaphase plate congression);GO:0010389(regulation of G2/M transition of mitotic cell cycle);GO:0005635(nuclea…	NA	OK	9.54601	32.0061	-1.74538	down	0.0001	yes
XLOC_019885	XLOC_019885	ENSBTAT00000013884	ASB7	chr21:6150495-6206191	ENSBTAG00000010514	ASB7	ankyrin repeat and SOCS box containing 7 [Source:HGNC Symbol;Acc:HGNC:17182]	GO:0005515(protein binding);GO:0016567(protein ubiquitination);GO:0035556(intracellular signal transduction)	NA	OK	8.50035	28.4385	-1.74225	down	0.0014	yes
XLOC_017453	XLOC_017453	ENSBTAT00000004411	PADI2	chr2:136049643-136105243	ENSBTAG00000003403	PADI2	peptidyl arginine deiminase, type II [Source:HGNC Symbol;Acc:HGNC:18341]	GO:0018101(protein citrullination);GO:0004668(protein-arginine deiminase activity);GO:0006464(cellular protein modification process);GO:0005509(calcium ion binding);GO:0005737(cytoplasm);GO:1901624(negative regulation of lymphocyte chemotaxis);GO:0010848(regulation of chromatin disassembly);GO:0036413(histone H3-R26 citrullination);GO:0035327(transcriptionally active chromatin);GO:0070100(negativ…	NA	OK	60.7878	198.843	-1.70978	down	0.00055	yes
XLOC_028214	XLOC_028214	ENSBTAT00000011454;ENSBTAT00000007938	ENSBTAG00000008690	chr3:102623620-102659082	ENSBTAG00000008690	-	Bos taurus solute carrier family 6 (neurotransmitter transporter, glycine), member 9 (SLC6A9), transcript variant 2, mRNA. [Source:RefSeq mRNA;Acc:NM_001242342]	GO:0015849(organic acid transport);GO:0005283(sodium:amino acid symporter activity);GO:0003333(amino acid transmembrane transport);GO:0015293(symporter activity);GO:0006836(neurotransmitter transport);GO:0005887(integral component of plasma membrane);GO:0005328(neurotransmitter:sodium symporter activity);GO:0055085(transmembrane transport);GO:0006810(transport);GO:0016021(integral component of me…	NA	OK	12.0228	39.1918	-1.70478	down	0.0005	yes
XLOC_010441	XLOC_010441	ENSBTAT00000004844	CHST1	chr15:76573747-76591524	ENSBTAG00000003721	CHST1	Bos taurus carbohydrate (keratan sulfate Gal-6) sulfotransferase 1 (CHST1), mRNA. [Source:RefSeq mRNA;Acc:NM_001083648]	GO:0008146(sulfotransferase activity);GO:0005975(carbohydrate metabolic process);GO:0000139(Golgi membrane);GO:0045130(keratan sulfotransferase activity);GO:0006790(sulfur compound metabolic process);GO:0042339(keratan sulfate metabolic process);GO:0006012(galactose metabolic process)	NA	OK	3.80689	12.4007	-1.70373	down	0.0075	yes
XLOC_027264	XLOC_027264	ENSBTAT00000029336	CPT1A	chr29:46820294-46880915	ENSBTAG00000021999	CPT1A	Uncharacterized protein [Source:UniProtKB/TrEMBL;Acc:E1BKY3]	GO:0016746(transferase activity, transferring acyl groups);GO:0016740(transferase activity);GO:0005743(mitochondrial inner membrane);GO:0005739(mitochondrion);GO:0009437(carnitine metabolic process);GO:0004095(carnitine O-palmitoyltransferase activity);GO:0030855(epithelial cell differentiation);GO:0001676(long-chain fatty acid metabolic process);GO:0016020(membrane)	00071(Fatty acid metabolism);03320(PPAR signaling pathway);04920(Adipocytokine signaling pathway)	OK	28.8882	93.9577	-1.70153	down	0.0002	yes
XLOC_022945	XLOC_022945	ENSBTAT00000014585	TTR	chr24:25854674-25863535	ENSBTAG00000010991	TTR	Bos taurus transthyretin (TTR), mRNA. [Source:RefSeq mRNA;Acc:NM_173967]	GO:0005179(hormone activity);GO:0006810(transport);GO:0005576(extracellular region);GO:0070062(extracellular vesicular exosome);GO:0042802(identical protein binding);GO:0005515(protein binding);GO:0005615(extracellular space)	NA	OK	9.88737	31.9029	-1.69003	down	0.00715	yes
XLOC_026611	XLOC_026611	-	-	chr29:44288679-44288994	ENSBTAG00000040118	-	Uncharacterized protein [Source:UniProtKB/TrEMBL;Acc:E1BMY6]	GO:0045095(keratin filament);GO:0005882(intermediate filament)	NA	OK	12.0455	38.5314	-1.67754	down	0.0254	yes
XLOC_007064	XLOC_007064	ENSBTAT00000043503	PKIG	chr13:73669766-73749996	ENSBTAG00000005275	PKIG	Bos taurus protein kinase (cAMP-dependent, catalytic) inhibitor gamma (PKIG), mRNA. [Source:RefSeq mRNA;Acc:NM_205812]	GO:0006469(negative regulation of protein kinase activity);GO:0004862(cAMP-dependent protein kinase inhibitor activity);GO:0042308(negative regulation of protein import into nucleus);GO:0000122(negative regulation of transcription from RNA polymerase II promoter);GO:0071901(negative regulation of protein serine/threonine kinase activity)	NA	OK	4.19795	13.4243	-1.6771	down	0.0061	yes
XLOC_029911	XLOC_029911	-	-	chr4:77909460-77909801	ENSBTAG00000040118	-	Uncharacterized protein [Source:UniProtKB/TrEMBL;Acc:E1BMY6]	GO:0045095(keratin filament);GO:0005882(intermediate filament)	NA	OK	27.1963	86.5481	-1.67009	down	0.0083	yes
XLOC_020005	XLOC_020005	ENSBTAT00000026564	RASGRF1	chr21:25713732-25816371	ENSBTAG00000019940	RASGRF1	Ras protein-specific guanine nucleotide-releasing factor 1 [Source:HGNC Symbol;Acc:HGNC:9875]	GO:0005515(protein binding);GO:0035023(regulation of Rho protein signal transduction);GO:0005089(Rho guanyl-nucleotide exchange factor activity);GO:0005085(guanyl-nucleotide exchange factor activity);GO:0007264(small GTPase mediated signal transduction);GO:0051056(regulation of small GTPase mediated signal transduction);GO:0005622(intracellular);GO:0035556(intracellular signal transduction);GO:00…	04010(MAPK signaling pathway);04510(Focal adhesion)	OK	3.20059	10.1711	-1.66806	down	0.0228	yes
XLOC_004198	XLOC_004198	ENSBTAT00000004836	EPAS1	chr11:28576346-28668903	ENSBTAG00000003711	EPAS1	Bos taurus endothelial PAS domain protein 1 (EPAS1), mRNA. [Source:RefSeq mRNA;Acc:NM_174725]	GO:0005515(protein binding);GO:0005667(transcription factor complex);GO:0046983(protein dimerization activity);GO:0007165(signal transduction);GO:0004871(signal transducer activity);GO:0006351(transcription, DNA-templated);GO:0003700(sequence-specific DNA binding transcription factor activity);GO:0003677(DNA binding);GO:0006355(regulation of transcription, DNA-templated);GO:0005634(nucleus);GO:00…	05200(Pathways in cancer);05211(Renal cell carcinoma)	OK	7.50653	23.8078	-1.66522	down	0.00025	yes
XLOC_033348	XLOC_033348	ENSBTAT00000063831;ENSBTAT00000011898;ENSBTAT00000063749	CENPE	chr6:22959306-23042396	ENSBTAG00000009035	CENPE	centromere protein E, 312kDa [Source:HGNC Symbol;Acc:HGNC:1856]	GO:0008017(microtubule binding);GO:0007018(microtubule-based movement);GO:0005874(microtubule);GO:0005871(kinesin complex);GO:0003777(microtubule motor activity);GO:0008152(metabolic process);GO:0005524(ATP binding);GO:0000166(nucleotide binding);GO:0000940(condensed chromosome outer kinetochore);GO:0000778(condensed nuclear chromosome kinetochore);GO:0000776(kinetochore);GO:0000779(condensed chr…	NA	OK	3.92363	12.372	-1.65682	down	0.0004	yes
XLOC_023068	XLOC_023068	-	-	chr24:49098995-49099544	ENSBTAG00000040118	-	Uncharacterized protein [Source:UniProtKB/TrEMBL;Acc:E1BMY6]	GO:0045095(keratin filament);GO:0005882(intermediate filament)	NA	OK	4.02745	12.5831	-1.64355	down	0.04575	yes
XLOC_011874	XLOC_011874	ENSBTAT00000010340	ASPM	chr16:77922302-77988157	ENSBTAG00000007860	ASPM	asp (abnormal spindle) homolog, microcephaly associated (Drosophila) [Source:HGNC Symbol;Acc:HGNC:19048]	GO:0005515(protein binding);GO:0097431(mitotic spindle pole);GO:0097150(neuronal stem cell maintenance);GO:0090306(spindle assembly involved in meiosis);GO:0072687(meiotic spindle);GO:0051661(maintenance of centrosome location);GO:0048477(oogenesis);GO:0045769(negative regulation of asymmetric cell division);GO:0021873(forebrain neuroblast division);GO:0090263(positive regulation of canonical Wnt…	NA	OK	5.44423	16.9485	-1.63836	down	0.00025	yes
XLOC_030221	XLOC_030221	-	-	chr4:120398453-120398668	ENSBTAG00000040118	-	Uncharacterized protein [Source:UniProtKB/TrEMBL;Acc:E1BMY6]	GO:0045095(keratin filament);GO:0005882(intermediate filament)	NA	OK	37.5205	115.881	-1.62689	down	0.03045	yes
XLOC_029039	XLOC_029039	ENSBTAT00000000389	LMO4	chr3:56832932-56853231	ENSBTAG00000000305	LMO4	Bos taurus LIM domain only 4 (LMO4), mRNA. [Source:RefSeq mRNA;Acc:NM_001034751]	GO:0006351(transcription, DNA-templated);GO:0046872(metal ion binding);GO:0008270(zinc ion binding);GO:0006355(regulation of transcription, DNA-templated);GO:0050865(regulation of cell activation);GO:0042659(regulation of cell fate specification);GO:0021514(ventral spinal cord interneuron differentiation);GO:0031333(negative regulation of protein complex assembly);GO:0001158(enhancer sequence-spe…	NA	OK	18.894	58.3202	-1.62607	down	0.00065	yes
XLOC_030283	XLOC_030283	ENSBTAT00000004181	ASNS	chr4:15035749-15183208	ENSBTAG00000003222	ASNS	Bos taurus asparagine synthetase (glutamine-hydrolyzing) (ASNS), mRNA. [Source:RefSeq mRNA;Acc:NM_001075653]	GO:0008652(cellular amino acid biosynthetic process);GO:0006529(asparagine biosynthetic process);GO:0004066(asparagine synthase (glutamine-hydrolyzing) activity);GO:0016874(ligase activity);GO:0006541(glutamine metabolic process);GO:0008152(metabolic process);GO:0005524(ATP binding);GO:0000166(nucleotide binding);GO:0070981(L-asparagine biosynthetic process);GO:0042149(cellular response to glucos…	00250(Alanine, aspartate and glutamate metabolism);00910(Nitrogen metabolism)	OK	61.207	188.802	-1.62511	down	0.0004	yes
XLOC_018157	XLOC_018157	-	-	chr2:128707620-128708328	ENSBTAG00000040118	-	Uncharacterized protein [Source:UniProtKB/TrEMBL;Acc:E1BMY6]	GO:0045095(keratin filament);GO:0005882(intermediate filament)	NA	OK	20.0932	61.6085	-1.61642	down	0.00315	yes
XLOC_013583	XLOC_013583	ENSBTAT00000001702	PPP1R15A	chr18:55925890-55929294	ENSBTAG00000001294	PPP1R15A	protein phosphatase 1, regulatory subunit 15A [Source:HGNC Symbol;Acc:HGNC:14375]	GO:0030968(endoplasmic reticulum unfolded protein response);GO:1902310(positive regulation of peptidyl-serine dephosphorylation);GO:0070972(protein localization to endoplasmic reticulum);GO:0045943(positive regulation of transcription from RNA polymerase I promoter);GO:0035308(negative regulation of protein dephosphorylation);GO:0032516(positive regulation of phosphoprotein phosphatase activity);…	NA	OK	3.48785	10.4247	-1.5796	down	0.00575	yes
XLOC_032576	XLOC_032576	ENSBTAT00000008298	ALDH1L2	chr5:68883464-68941780	ENSBTAG00000006326	ALDH1L2	Bos taurus aldehyde dehydrogenase 1 family, member L2 (ALDH1L2), mRNA. [Source:RefSeq mRNA;Acc:NM_001191391]	GO:0016620(oxidoreductase activity, acting on the aldehyde or oxo group of donors, NAD or NADP as acceptor);GO:0006730(one-carbon metabolic process);GO:0055114(oxidation-reduction process);GO:0016491(oxidoreductase activity);GO:0032259(methylation);GO:0008168(methyltransferase activity);GO:0009058(biosynthetic process);GO:0008152(metabolic process);GO:0003824(catalytic activity);GO:0005737(cytopl…	00670(One carbon pool by folate)	OK	9.5573	28.5564	-1.57914	down	0.0012	yes
XLOC_003423	XLOC_003423	ENSBTAT00000035838	ENSBTAG00000020100	chr10:30138361-30159863	NA	NA	NA	NA	NA	OK	5.87337	17.4652	-1.57222	down	0.00095	yes
XLOC_030506	XLOC_030506	ENSBTAT00000025254	GARS	chr4:66102955-66156434	ENSBTAG00000018972	GARS	Bos taurus glycyl-tRNA synthetase (GARS), mRNA. [Source:RefSeq mRNA;Acc:NM_001097566]	GO:0006426(glycyl-tRNA aminoacylation);GO:0004820(glycine-tRNA ligase activity);GO:0006418(tRNA aminoacylation for protein translation);GO:0004812(aminoacyl-tRNA ligase activity);GO:0005737(cytoplasm);GO:0005524(ATP binding);GO:0000166(nucleotide binding);GO:0030141(secretory granule);GO:0005739(mitochondrion);GO:0005515(protein binding);GO:0015966(diadenosine tetraphosphate biosynthetic process)…	00970(Aminoacyl-tRNA biosynthesis)	OK	122.721	361.447	-1.5584	down	0.00055	yes
XLOC_029392	XLOC_029392	ENSBTAT00000042677	HJURP	chr3:114122121-114135097	ENSBTAG00000024726	HJURP	Holliday junction recognition protein [Source:HGNC Symbol;Acc:HGNC:25444]	GO:0042393(histone binding);GO:0005634(nucleus);GO:0000775(chromosome, centromeric region);GO:0051101(regulation of DNA binding);GO:0043254(regulation of protein complex assembly);GO:0007059(chromosome segregation);GO:0000777(condensed chromosome kinetochore);GO:0042802(identical protein binding);GO:0005515(protein binding);GO:0005730(nucleolus);GO:0034080(CENP-A containing nucleosome assembly);G…	NA	OK	13.4949	39.5494	-1.55124	down	0.0015	yes
XLOC_026617	XLOC_026617	-	-	chr29:44294061-44294411	ENSBTAG00000040118	-	Uncharacterized protein [Source:UniProtKB/TrEMBL;Acc:E1BMY6]	GO:0045095(keratin filament);GO:0005882(intermediate filament)	NA	OK	11.6995	34.1596	-1.54584	down	0.02995	yes
XLOC_036042	XLOC_036042	-	-	chr7:51502538-51503193	ENSBTAG00000040118	-	Uncharacterized protein [Source:UniProtKB/TrEMBL;Acc:E1BMY6]	GO:0045095(keratin filament);GO:0005882(intermediate filament)	NA	OK	11.3497	33.1002	-1.54419	down	0.00945	yes
XLOC_018728	XLOC_018728	ENSBTAT00000025670	CCNB1	chr20:10431452-10441126	ENSBTAG00000014239	CCNB1	Bos taurus cyclin B1 (CCNB1), mRNA. [Source:RefSeq mRNA;Acc:NM_001045872]	GO:0019901(protein kinase binding);GO:0000079(regulation of cyclin-dependent protein serine/threonine kinase activity);GO:0051726(regulation of cell cycle);GO:0051301(cell division);GO:0007067(mitotic nuclear division);GO:0005813(centrosome);GO:0007049(cell cycle);GO:0005815(microtubule organizing center);GO:0005856(cytoskeleton);GO:0005634(nucleus);GO:0005737(cytoplasm);GO:2000775(histone H3-S10…	04110(Cell cycle);04114(Oocyte meiosis);04115(p53 signaling pathway);04914(Progesterone-mediated oocyte maturation)	OK	49.0536	142.563	-1.53917	down	0.0012	yes
XLOC_026127	XLOC_026127	ENSBTAT00000019038	PBLD	chr28:24868873-24892256	ENSBTAG00000014315	PBLD	Bos taurus phenazine biosynthesis-like protein domain containing (PBLD), mRNA. [Source:RefSeq mRNA;Acc:NM_001045886]	GO:0016853(isomerase activity);GO:0009058(biosynthetic process);GO:0003824(catalytic activity);GO:0060392(negative regulation of SMAD protein import into nucleus);GO:0010633(negative regulation of epithelial cell migration);GO:0060394(negative regulation of pathway-restricted SMAD protein phosphorylation);GO:0010719(negative regulation of epithelial to mesenchymal transition);GO:0050680(negative …	NA	OK	7.36477	21.3958	-1.53861	down	0.00195	yes
XLOC_029278	XLOC_029278	ENSBTAT00000002687	KDM4A	chr3:102926061-102965737	ENSBTAG00000002078	KDM4A	lysine (K)-specific demethylase 4A [Source:HGNC Symbol;Acc:HGNC:22978]	GO:0005515(protein binding);GO:0046872(metal ion binding);GO:0008270(zinc ion binding);GO:0005634(nucleus);GO:0014898(cardiac muscle hypertrophy in response to stress);GO:0070544(histone H3-K36 demethylation);GO:0051864(histone demethylase activity (H3-K36 specific));GO:0016577(histone demethylation);GO:0005730(nucleolus);GO:0045892(negative regulation of transcription, DNA-templated);GO:0035064(…	NA	OK	27.0803	78.5368	-1.53613	down	0.0006	yes
XLOC_033322	XLOC_033322	ENSBTAT00000020263	PLA2G12A	chr6:16828630-16843001	ENSBTAG00000015230	PLA2G12A	Bos taurus phospholipase A2, group XIIA (PLA2G12A), mRNA. [Source:RefSeq mRNA;Acc:NM_001098063]	GO:0006644(phospholipid metabolic process);GO:0004623(phospholipase A2 activity);GO:0016042(lipid catabolic process);GO:0005509(calcium ion binding);GO:0005794(Golgi apparatus);GO:0005783(endoplasmic reticulum);GO:0005622(intracellular);GO:0005576(extracellular region)	00564(Glycerophospholipid metabolism);00565(Ether lipid metabolism);00590(Arachidonic acid metabolism);00591(Linoleic acid metabolism);00592(alpha-Linolenic acid metabolism);04010(MAPK signaling pathway);04270(Vascular smooth muscle contraction);04370(VEGF signaling pathway);04664(Fc epsilon RI signaling pathway);04730(Long-term depression);04912(GnRH signaling pathway)	OK	3.90613	11.315	-1.53443	down	0.0022	yes
XLOC_024097	XLOC_024097	ENSBTAT00000017392	PSPH	chr25:27954602-27977223	ENSBTAG00000013081	PSPH	Bos taurus phosphoserine phosphatase (PSPH), mRNA. [Source:RefSeq mRNA;Acc:NM_001046355]	GO:0006564(L-serine biosynthetic process);GO:0008253(5'-nucleotidase activity);GO:0008652(cellular amino acid biosynthetic process);GO:0006563(L-serine metabolic process);GO:0000287(magnesium ion binding);GO:0046872(metal ion binding);GO:0005509(calcium ion binding);GO:0016787(hydrolase activity);GO:0008152(metabolic process);GO:0005737(cytoplasm);GO:0016791(phosphatase activity);GO:0016311(depho…	00260(Glycine, serine and threonine metabolism)	OK	69.7931	198.532	-1.50822	down	0.00195	yes
XLOC_008827	XLOC_008827	ENSBTAT00000037192	ESRP1	chr14:71944917-72003348	ENSBTAG00000021838	ESRP1	epithelial splicing regulatory protein 1 [Source:HGNC Symbol;Acc:HGNC:25966]	GO:0003676(nucleic acid binding);GO:0000166(nucleotide binding);GO:0003729(mRNA binding);GO:0043484(regulation of RNA splicing);GO:0005634(nucleus)	NA	OK	23.0019	65.008	-1.49886	down	0.00115	yes
XLOC_037797	XLOC_037797	ENSBTAT00000027125	KLF4	chr8:98843683-98848280	ENSBTAG00000020355	KLF4	Bos taurus Kruppel-like factor 4 (gut) (KLF4), mRNA. [Source:RefSeq mRNA;Acc:NM_001105385]	GO:0046872(metal ion binding);GO:0003676(nucleic acid binding);GO:0001010(sequence-specific DNA binding transcription factor recruiting transcription factor activity);GO:0048730(epidermis morphogenesis);GO:0032526(response to retinoic acid);GO:0031077(post-embryonic camera-type eye development);GO:0009913(epidermal cell differentiation);GO:0001085(RNA polymerase II transcription factor binding);G…	NA	OK	5.60269	15.7903	-1.49484	down	0.0039	yes
XLOC_000839	XLOC_000839	ENSBTAT00000010623	MGC137058	chr1:107879011-107893160	ENSBTAG00000008078	MGC137058	Bos taurus tripartite motif containing 59 (TRIM59), mRNA. [Source:RefSeq mRNA;Acc:NM_001080310]	GO:0005515(protein binding);GO:0005622(intracellular);GO:0046872(metal ion binding);GO:0008270(zinc ion binding);GO:0046597(negative regulation of viral entry into host cell);GO:0043124(negative regulation of I-kappaB kinase/NF-kappaB signaling);GO:0004842(ubiquitin-protein transferase activity);GO:0005783(endoplasmic reticulum);GO:0045087(innate immune response);GO:0016567(protein ubiquitination)	NA	OK	4.71409	13.2175	-1.4874	down	0.0068	yes
XLOC_006140	XLOC_006140	ENSBTAT00000015468	SLC25A15	chr12:21798803-21831677	ENSBTAG00000011647	SLC25A15	Bos taurus solute carrier family 25 (mitochondrial carrier; ornithine transporter) member 15 (SLC25A15), mRNA. [Source:RefSeq mRNA;Acc:NM_001046326]	GO:0006810(transport);GO:0016021(integral component of membrane);GO:0005743(mitochondrial inner membrane);GO:0005739(mitochondrion);GO:0016020(membrane)	NA	OK	37.1345	104.055	-1.48652	down	0.0027	yes
XLOC_012338	XLOC_012338	ENSBTAT00000004034;ENSBTAT00000065365	SMTN	chr17:72041433-72064312	ENSBTAG00000003100	SMTN	Bos taurus smoothelin (SMTN), mRNA. [Source:RefSeq mRNA;Acc:NM_001076879]	GO:0005515(protein binding)	NA	OK	14.6681	41.0991	-1.48642	down	0.00185	yes
XLOC_030461	XLOC_030461	ENSBTAT00000028707	MDFIC	chr4:53756423-53854749	ENSBTAG00000021543	MDFIC	Bos taurus MyoD family inhibitor domain containing (MDFIC), mRNA. [Source:RefSeq mRNA;Acc:NM_001101102]	GO:0042308(negative regulation of protein import into nucleus);GO:0005730(nucleolus);GO:0045892(negative regulation of transcription, DNA-templated);GO:0005515(protein binding);GO:0005654(nucleoplasm);GO:0005794(Golgi apparatus)	NA	OK	10.7201	29.969	-1.48316	down	0.0024	yes
XLOC_037862	XLOC_037862	ENSBTAT00000023012	AKNA	chr8:105222588-105325069	ENSBTAG00000017306	AKNA	AT-hook transcription factor [Source:HGNC Symbol;Acc:HGNC:24108]	GO:0001077(RNA polymerase II core promoter proximal region sequence-specific DNA binding transcription factor activity involved in positive regulation of transcription);GO:0000978(RNA polymerase II core promoter proximal region sequence-specific DNA binding);GO:0045944(positive regulation of transcription from RNA polymerase II promoter);GO:0016020(membrane)	NA	OK	3.67623	10.2359	-1.47734	down	0.0039	yes
XLOC_017326	XLOC_017326	ENSBTAT00000006727;ENSBTAT00000065543	PAFAH2	chr2:127684780-127720396	ENSBTAG00000005105	PAFAH2	Bos taurus platelet-activating factor acetylhydrolase 2, 40kDa (PAFAH2), mRNA. [Source:RefSeq mRNA;Acc:NM_174570]	GO:0016042(lipid catabolic process);GO:0006629(lipid metabolic process);GO:0016787(hydrolase activity);GO:0005737(cytoplasm);GO:0003847(1-alkyl-2-acetylglycerophosphocholine esterase activity)	00565(Ether lipid metabolism)	OK	6.59298	18.3324	-1.47539	down	0.0031	yes
XLOC_006138	XLOC_006138	ENSBTAT00000052675	CKAP2	chr12:21599799-21625644	ENSBTAG00000021162	CKAP2	cytoskeleton associated protein 2 [Source:HGNC Symbol;Acc:HGNC:1990]	GO:0007026(negative regulation of microtubule depolymerization);GO:0005881(cytoplasmic microtubule);GO:0015630(microtubule cytoskeleton);GO:0000281(mitotic cytokinesis);GO:0045944(positive regulation of transcription from RNA polymerase II promoter);GO:0005813(centrosome);GO:0005737(cytoplasm)	NA	OK	34.2548	95.2312	-1.47513	down	0.00135	yes
XLOC_027674	XLOC_027674	ENSBTAT00000026724	TXNIP	chr3:21489081-21493251	ENSBTAG00000020060	TXNIP	Bos taurus thioredoxin interacting protein (TXNIP), mRNA. [Source:RefSeq mRNA;Acc:NM_001101875]	GO:0048008(platelet-derived growth factor receptor signaling pathway);GO:0006979(response to oxidative stress);GO:0043086(negative regulation of catalytic activity);GO:0004857(enzyme inhibitor activity);GO:0006606(protein import into nucleus);GO:0000122(negative regulation of transcription from RNA polymerase II promoter);GO:0005515(protein binding);GO:0005737(cytoplasm);GO:0071228(cellular respo…	NA	OK	5.49875	15.2774	-1.47422	down	0.00365	yes
XLOC_010794	XLOC_010794	ENSBTAT00000034028	DHRS3	chr16:41985338-42040600	ENSBTAG00000024493	DHRS3	Bos taurus dehydrogenase/reductase (SDR family) member 3 (DHRS3), mRNA. [Source:RefSeq mRNA;Acc:NM_174180]	GO:0050662(coenzyme binding);GO:0055114(oxidation-reduction process);GO:0016491(oxidoreductase activity);GO:0009058(biosynthetic process);GO:0008152(metabolic process);GO:0003824(catalytic activity);GO:0030278(regulation of ossification);GO:0060021(palate development);GO:0060349(bone morphogenesis);GO:0003151(outflow tract morphogenesis);GO:0001523(retinoid metabolic process);GO:0004745(retinol d…	NA	OK	8.06824	22.4005	-1.4732	down	0.018	yes
XLOC_016844	XLOC_016844	ENSBTAT00000045869	RND3	chr2:45800465-45822011	ENSBTAG00000039731	RND3	Bos taurus Rho family GTPase 3 (RND3), mRNA. [Source:RefSeq mRNA;Acc:NM_001191158]	GO:0006184(GTP catabolic process);GO:0007264(small GTPase mediated signal transduction);GO:0005525(GTP binding);GO:0007165(signal transduction);GO:0005622(intracellular);GO:0015031(protein transport);GO:0000166(nucleotide binding);GO:0005515(protein binding);GO:0016020(membrane);GO:0070062(extracellular vesicular exosome);GO:0005925(focal adhesion)	NA	OK	16.9221	46.9783	-1.47309	down	0.0019	yes
XLOC_004853	XLOC_004853	-	-	chr11:5110344-5114607	ENSBTAG00000040118	-	Uncharacterized protein [Source:UniProtKB/TrEMBL;Acc:E1BMY6]	GO:0045095(keratin filament);GO:0005882(intermediate filament)	NA	OK	6.95315	19.2908	-1.47218	down	0.01465	yes
XLOC_036152	XLOC_036152	ENSBTAT00000019758	SPARC	chr7:64878193-64900828	ENSBTAG00000014835	SPARC	Bos taurus secreted protein, acidic, cysteine-rich (osteonectin) (SPARC), mRNA. [Source:RefSeq mRNA;Acc:NM_174464]	GO:0005604(basement membrane);GO:0005515(protein binding);GO:0005615(extracellular space);GO:0005578(proteinaceous extracellular matrix);GO:0007165(signal transduction);GO:0046872(metal ion binding);GO:0005509(calcium ion binding);GO:0050840(extracellular matrix binding);GO:0071363(cellular response to growth factor stimulus);GO:0031012(extracellular matrix);GO:0060348(bone development);GO:004212…	NA	OK	3.91781	10.8558	-1.47035	down	0.00745	yes
XLOC_003998	XLOC_003998	ENSBTAT00000006322	INPP4A	chr11:3684899-3739057	ENSBTAG00000004814	INPP4A	inositol polyphosphate-4-phosphatase, type I, 107kDa [Source:HGNC Symbol;Acc:HGNC:6074]	GO:0005515(protein binding)	00562(Inositol phosphate metabolism);04070(Phosphatidylinositol signaling system)	OK	8.8989	24.5425	-1.46358	down	0.0025	yes
XLOC_004201	XLOC_004201	ENSBTAT00000018269	RHOQ	chr11:28834368-28902847	ENSBTAG00000013749	RHOQ	Bos taurus ras homolog gene family, member Q (RHOQ), mRNA. [Source:RefSeq mRNA;Acc:NM_001205498]	GO:0006184(GTP catabolic process);GO:0007264(small GTPase mediated signal transduction);GO:0005525(GTP binding);GO:0007165(signal transduction);GO:0005622(intracellular);GO:0015031(protein transport);GO:0000166(nucleotide binding);GO:0090005(negative regulation of establishment of protein localization to plasma membrane);GO:0032869(cellular response to insulin stimulus);GO:0030866(cortical actin …	04910(Insulin signaling pathway)	OK	28.2307	77.8515	-1.46346	down	0.0111	yes
XLOC_023404	XLOC_023404	ENSBTAT00000019217	PLK1	chr25:21587068-21597613	ENSBTAG00000014453	PLK1	Bos taurus polo-like kinase 1 (PLK1), mRNA. [Source:RefSeq mRNA;Acc:NM_001038173]	GO:0007094(mitotic spindle assembly checkpoint);GO:0051297(centrosome organization);GO:0000777(condensed chromosome kinetochore);GO:0000776(kinetochore);GO:0005515(protein binding);GO:0031572(G2 DNA damage checkpoint);GO:0000281(mitotic cytokinesis);GO:0000775(chromosome, centromeric region);GO:0005819(spindle);GO:0001578(microtubule bundle formation);GO:0043066(negative regulation of apoptotic p…	04110(Cell cycle);04114(Oocyte meiosis);04914(Progesterone-mediated oocyte maturation)	OK	17.7195	48.6902	-1.4583	down	0.0033	yes
XLOC_026550	XLOC_026550	ENSBTAT00000030071	SLC3A2	chr29:41855870-41896760	ENSBTAG00000013240	SLC3A2	Bos taurus solute carrier family 3 (activators of dibasic and neutral amino acid transport), member 2 (SLC3A2), mRNA. [Source:RefSeq mRNA;Acc:NM_001024488]	GO:0005975(carbohydrate metabolic process);GO:0003824(catalytic activity);GO:0005515(protein binding);GO:0005654(nucleoplasm);GO:0005886(plasma membrane);GO:0005737(cytoplasm);GO:0005634(nucleus);GO:0043169(cation binding)	NA	OK	69.5512	189.443	-1.44562	down	0.00245	yes
XLOC_016684	XLOC_016684	ENSBTAT00000038684	COL5A2	chr2:7139380-7300524	ENSBTAG00000027020	COL5A2	collagen, type V, alpha 2 [Source:HGNC Symbol;Acc:HGNC:2210]	GO:0005201(extracellular matrix structural constituent);GO:0005515(protein binding);GO:0005581(collagen trimer);GO:0031012(extracellular matrix);GO:0071230(cellular response to amino acid stimulus);GO:0046332(SMAD binding);GO:0030199(collagen fibril organization);GO:0001501(skeletal system development);GO:0043588(skin development);GO:1903225(negative regulation of endodermal cell differentiation)…	NA	OK	9.47382	25.7896	-1.44477	down	0.0021	yes
XLOC_003254	XLOC_003254	ENSBTAT00000015834	PCK2	chr10:20870283-20878569	ENSBTAG00000011934	PCK2	Bos taurus phosphoenolpyruvate carboxykinase 2 (mitochondrial) (PCK2), mRNA. [Source:RefSeq mRNA;Acc:NM_001205594]	GO:0005525(GTP binding);GO:0005739(mitochondrion);GO:0017076(purine nucleotide binding);GO:0006094(gluconeogenesis);GO:0004613(phosphoenolpyruvate carboxykinase (GTP) activity);GO:0004611(phosphoenolpyruvate carboxykinase activity);GO:0070062(extracellular vesicular exosome);GO:0005515(protein binding)	00010(Glycolysis / Gluconeogenesis);00020(Citrate cycle (TCA cycle));00620(Pyruvate metabolism);03320(PPAR signaling pathway);04910(Insulin signaling pathway);04920(Adipocytokine signaling pathway);04964(Proximal tubule bicarbonate reclamation)	OK	52.2357	142.102	-1.44382	down	0.00245	yes
XLOC_016527	XLOC_016527	ENSBTAT00000018321	UBALD2	chr19:56072683-56078553	ENSBTAG00000013792	UBALD2	UBA-like domain containing 2 [Source:HGNC Symbol;Acc:HGNC:28438]	GO:0005515(protein binding)	NA	OK	21.8769	58.6013	-1.42153	down	0.0063	yes
XLOC_026606	XLOC_026606	-	-	chr29:44278764-44284096	ENSBTAG00000040118	-	Uncharacterized protein [Source:UniProtKB/TrEMBL;Acc:E1BMY6]	GO:0045095(keratin filament);GO:0005882(intermediate filament)	NA	OK	102.902	274.768	-1.41694	down	0.00455	yes
XLOC_007279	XLOC_007279	ENSBTAT00000013221	FAM107B	chr13:29499891-29578090	ENSBTAG00000010023	FAM107B	family with sequence similarity 107, member B [Source:HGNC Symbol;Acc:HGNC:23726]	GO:0007605(sensory perception of sound)	NA	OK	20.1836	53.8088	-1.41466	down	0.0038	yes
XLOC_012939	XLOC_012939	ENSBTAT00000026393	AARS	chr18:1829590-1850878	ENSBTAG00000019810	AARS	Bos taurus alanyl-tRNA synthetase (AARS), mRNA. [Source:RefSeq mRNA;Acc:NM_001101075]	GO:0008270(zinc ion binding);GO:0043039(tRNA aminoacylation);GO:0016876(ligase activity, forming aminoacyl-tRNA and related compounds);GO:0006419(alanyl-tRNA aminoacylation);GO:0005737(cytoplasm);GO:0005524(ATP binding);GO:0004813(alanine-tRNA ligase activity);GO:0003676(nucleic acid binding);GO:0000166(nucleotide binding);GO:0034620(cellular response to unfolded protein);GO:0006400(tRNA modifica…	00970(Aminoacyl-tRNA biosynthesis)	OK	60.7011	161.074	-1.40793	down	0.00185	yes
XLOC_002424	XLOC_002424	ENSBTAT00000045876;ENSBTAT00000056746	C10H15ORF23	chr10:36117897-36127741	ENSBTAG00000032340	C10H15ORF23	Bos taurus chromosome 10 open reading frame, human C15orf23 (C10H15orf23), mRNA. [Source:RefSeq mRNA;Acc:NM_001038055]	GO:0005515(protein binding);GO:0072686(mitotic spindle);GO:0000070(mitotic sister chromatid segregation);GO:0007059(chromosome segregation);GO:0035371(microtubule plus-end);GO:0051988(regulation of attachment of spindle microtubules to kinetochore);GO:0000776(kinetochore);GO:0015630(microtubule cytoskeleton);GO:0007051(spindle organization);GO:0005737(cytoplasm)	NA	OK	18.8993	50.0429	-1.40484	down	0.0034	yes
XLOC_001234	XLOC_001234	ENSBTAT00000017358;ENSBTAT00000062945	CBLB	chr1:50659199-50881601	ENSBTAG00000013057	CBLB	Cbl proto-oncogene B, E3 ubiquitin protein ligase [Source:HGNC Symbol;Acc:HGNC:1542]	GO:0023051(regulation of signaling);GO:0001784(phosphotyrosine binding);GO:0005515(protein binding);GO:0007166(cell surface receptor signaling pathway);GO:0004842(ubiquitin-protein transferase activity);GO:0004871(signal transducer activity);GO:0016567(protein ubiquitination);GO:0046872(metal ion binding);GO:0005509(calcium ion binding);GO:0008270(zinc ion binding);GO:0005634(nucleus);GO:0046642(…	04012(ErbB signaling pathway);04120(Ubiquitin mediated proteolysis);04144(Endocytosis);04630(Jak-STAT signaling pathway);04660(T cell receptor signaling pathway);04910(Insulin signaling pathway);05100(Bacterial invasion of epithelial cells);05200(Pathways in cancer);05220(Chronic myeloid leukemia)	OK	7.61581	20.1573	-1.40423	down	0.00295	yes
XLOC_039996	XLOC_039996	ENSBTAT00000018283	BEX2	chrX:57184733-57186320	ENSBTAG00000036028	BEX2	Bos taurus brain expressed X-linked 2 (BEX2), mRNA. [Source:RefSeq mRNA;Acc:NM_001077087]	NA	NA	OK	5.54055	14.6225	-1.40009	down	0.0227	yes
XLOC_012189	XLOC_012189	ENSBTAT00000061505	CIT	chr17:57816617-57990993	ENSBTAG00000008963	CIT	Uncharacterized protein [Source:UniProtKB/TrEMBL;Acc:F1N747]	GO:0004713(protein tyrosine kinase activity);GO:0016772(transferase activity, transferring phosphorus-containing groups);GO:0006468(protein phosphorylation);GO:0004674(protein serine/threonine kinase activity);GO:0004672(protein kinase activity);GO:0007165(signal transduction);GO:0050790(regulation of catalytic activity);GO:0005083(small GTPase regulator activity);GO:0035556(intracellular signal …	NA	OK	5.50824	14.5205	-1.39843	down	0.00315	yes
XLOC_020695	XLOC_020695	ENSBTAT00000000611	HYAL1	chr22:50600488-50601799	ENSBTAG00000000483	HYAL1	Bos taurus hyaluronoglucosaminidase 1 (HYAL1), mRNA. [Source:RefSeq mRNA;Acc:NM_001017941]	GO:0050679(positive regulation of epithelial cell proliferation);GO:0008134(transcription factor binding);GO:0045766(positive regulation of angiogenesis);GO:0051216(cartilage development);GO:0009615(response to virus);GO:0030308(negative regulation of cell growth);GO:0030212(hyaluronan metabolic process);GO:0030307(positive regulation of cell growth);GO:0005615(extracellular space);GO:0016798(hyd…	00531(Glycosaminoglycan degradation)	OK	4.53051	11.8531	-1.38751	down	0.03235	yes
XLOC_007500	XLOC_007500	ENSBTAT00000027003	CDH26	chr13:57056735-57103118	ENSBTAG00000020261	CDH26	cadherin 26 [Source:HGNC Symbol;Acc:HGNC:15902]	GO:0007156(homophilic cell adhesion via plasma membrane adhesion molecules);GO:0007155(cell adhesion);GO:0005886(plasma membrane);GO:0016021(integral component of membrane);GO:0005509(calcium ion binding);GO:0016020(membrane)	NA	OK	4.59375	12.0151	-1.3871	down	0.0077	yes
XLOC_018869	XLOC_018869	-	-	chr20:26113187-26113730	ENSBTAG00000040118	-	Uncharacterized protein [Source:UniProtKB/TrEMBL;Acc:E1BMY6]	GO:0045095(keratin filament);GO:0005882(intermediate filament)	NA	OK	15.2158	39.6183	-1.3806	down	0.0189	yes
XLOC_008184	XLOC_008184	ENSBTAT00000037186	TP53INP1	chr14:71735422-71788539	ENSBTAG00000026232	TP53INP1	tumor protein p53 inducible nuclear protein 1 [Source:HGNC Symbol;Acc:HGNC:18022]	GO:0072703(cellular response to methyl methanesulfonate);GO:0030336(negative regulation of cell migration);GO:0071361(cellular response to ethanol);GO:0071447(cellular response to hydroperoxide);GO:0016209(antioxidant activity);GO:0034644(cellular response to UV);GO:0007050(cell cycle arrest);GO:0009408(response to heat);GO:2001235(positive regulation of apoptotic signaling pathway);GO:0043065(po…	NA	OK	53.5535	139.302	-1.37916	down	0.0398	yes
XLOC_026068	XLOC_026068	-	-	chr28:7440652-7444794	ENSBTAG00000040118	-	Uncharacterized protein [Source:UniProtKB/TrEMBL;Acc:E1BMY6]	GO:0045095(keratin filament);GO:0005882(intermediate filament)	NA	OK	11.1712	28.954	-1.37398	down	0.00445	yes
XLOC_016209	XLOC_016209	ENSBTAT00000061367	TOP2A	chr19:41281057-41307320	ENSBTAG00000019262	TOP2A	topoisomerase (DNA) II alpha 170kDa [Source:HGNC Symbol;Acc:HGNC:11989]	GO:0006259(DNA metabolic process);GO:0000287(magnesium ion binding);GO:0016853(isomerase activity);GO:0006265(DNA topological change);GO:0003916(DNA topoisomerase activity);GO:0003677(DNA binding);GO:0006200(ATP catabolic process);GO:0005634(nucleus);GO:0005524(ATP binding);GO:0000166(nucleotide binding);GO:0030261(chromosome condensation);GO:0003918(DNA topoisomerase type II (ATP-hydrolyzing) ac…	NA	OK	24.6625	63.8553	-1.37249	down	0.00295	yes
XLOC_035269	XLOC_035269	ENSBTAT00000019652	HMMR	chr7:77270891-77303952	ENSBTAG00000014773	HMMR	hyaluronan-mediated motility receptor (RHAMM) [Source:HGNC Symbol;Acc:HGNC:5012]	GO:0005540(hyaluronic acid binding);GO:0016020(membrane)	04512(ECM-receptor interaction)	OK	10.2006	26.3525	-1.36929	down	0.0049	yes
XLOC_005823	XLOC_005823	-	-	chr12:51025804-51026171	ENSBTAG00000040118	-	Uncharacterized protein [Source:UniProtKB/TrEMBL;Acc:E1BMY6]	GO:0045095(keratin filament);GO:0005882(intermediate filament)	NA	OK	18.9616	48.8922	-1.36652	down	0.035	yes
XLOC_005409	XLOC_005409	ENSBTAT00000057533	GRP78	chr11:96115348-96119306	ENSBTAG00000007662	GRP78	Uncharacterized protein [Source:UniProtKB/TrEMBL;Acc:F1N614]	GO:0006950(response to stress);GO:0005524(ATP binding);GO:0000166(nucleotide binding);GO:0051787(misfolded protein binding);GO:0006987(activation of signaling protein activity involved in unfolded protein response);GO:0021589(cerebellum structural organization);GO:0031398(positive regulation of protein ubiquitination);GO:0021680(cerebellar Purkinje cell layer development);GO:0005788(endoplasmic r…	NA	OK	371.549	954.403	-1.36104	down	0.0051	yes
XLOC_006787	XLOC_006787	ENSBTAT00000006739	BMP2	chr13:49549213-49583559	ENSBTAG00000005111	BMP2	Bos taurus bone morphogenetic protein 2 (BMP2), mRNA. [Source:RefSeq mRNA;Acc:NM_001099141]	GO:2000726(negative regulation of cardiac muscle cell differentiation);GO:0070700(BMP receptor binding);GO:0061036(positive regulation of cartilage development);GO:0060395(SMAD protein signal transduction);GO:0060389(pathway-restricted SMAD protein phosphorylation);GO:0060317(cardiac epithelial to mesenchymal transition);GO:0048762(mesenchymal cell differentiation);GO:0045786(negative regulation …	04340(Hedgehog signaling pathway);04350(TGF-beta signaling pathway);05200(Pathways in cancer);05217(Basal cell carcinoma)	OK	25.2894	64.8599	-1.35879	down	0.00445	yes
XLOC_015803	XLOC_015803	ENSBTAT00000022573	RAB11FIP4	chr19:18850324-18886769	ENSBTAG00000016972	RAB11FIP4	RAB11 family interacting protein 4 (class II) [Source:HGNC Symbol;Acc:HGNC:30267]	GO:0032154(cleavage furrow);GO:0030139(endocytic vesicle);GO:0055038(recycling endosome membrane);GO:0000910(cytokinesis);GO:0042803(protein homodimerization activity);GO:0005515(protein binding);GO:0017137(Rab GTPase binding);GO:0005768(endosome);GO:0030306(ADP-ribosylation factor binding);GO:0030496(midbody);GO:0005615(extracellular space)	NA	OK	10.7352	27.4352	-1.35367	down	0.00595	yes
XLOC_002777	XLOC_002777	ENSBTAT00000007751	FNTB	chr10:77421463-77502096	ENSBTAG00000005897	FNTB	Bos taurus farnesyltransferase, CAAX box, beta (FNTB), mRNA. [Source:RefSeq mRNA;Acc:NM_175805]	GO:0042127(regulation of cell proliferation);GO:0004659(prenyltransferase activity);GO:0016740(transferase activity);GO:0046872(metal ion binding);GO:0003824(catalytic activity);GO:0008270(zinc ion binding);GO:0004311(farnesyltranstransferase activity);GO:0048146(positive regulation of fibroblast proliferation);GO:0042060(wound healing);GO:0008284(positive regulation of cell proliferation);GO:000…	NA	OK	9.81698	25.0676	-1.35247	down	0.0078	yes
XLOC_001468	XLOC_001468	ENSBTAT00000023192	KLHL24	chr1:84062594-84095789	ENSBTAG00000017450	KLHL24	kelch-like family member 24 [Source:HGNC Symbol;Acc:HGNC:25947]	GO:0005515(protein binding)	NA	OK	4.6793	11.9244	-1.34955	down	0.00865	yes
XLOC_035749	XLOC_035749	ENSBTAT00000055062	TNFAIP8L1	chr7:20697580-20716655	ENSBTAG00000037765	TNFAIP8L1	Bos taurus tumor necrosis factor, alpha-induced protein 8-like 1 (TNFAIP8L1), mRNA. [Source:RefSeq mRNA;Acc:NM_001103270]	GO:0032007(negative regulation of TOR signaling);GO:0005515(protein binding);GO:0005737(cytoplasm)	NA	OK	4.28915	10.9179	-1.34793	down	0.0139	yes
XLOC_038357	XLOC_038357	ENSBTAT00000039096	SYNJ2	chr9:96023839-96092510	ENSBTAG00000000817	SYNJ2	synaptojanin 2 [Source:HGNC Symbol;Acc:HGNC:11504]	GO:0046856(phosphatidylinositol dephosphorylation);GO:0042578(phosphoric ester hydrolase activity);GO:0003676(nucleic acid binding);GO:0000166(nucleotide binding);GO:0004439(phosphatidylinositol-4,5-bisphosphate 5-phosphatase activity);GO:0005515(protein binding)	00562(Inositol phosphate metabolism);04070(Phosphatidylinositol signaling system)	OK	4.48566	11.4073	-1.34657	down	0.00655	yes
XLOC_036083	XLOC_036083	ENSBTAT00000010347	GNPDA1	chr7:54748004-54759289	ENSBTAG00000007865	GNPDA1	Bos taurus glucosamine-6-phosphate deaminase 1 (GNPDA1), mRNA. [Source:RefSeq mRNA;Acc:NM_001080287]	GO:0006044(N-acetylglucosamine metabolic process);GO:0004342(glucosamine-6-phosphate deaminase activity);GO:0005975(carbohydrate metabolic process);GO:0016787(hydrolase activity);GO:0005737(cytoplasm);GO:0006043(glucosamine catabolic process);GO:0006091(generation of precursor metabolites and energy);GO:0070062(extracellular vesicular exosome)	00520(Amino sugar and nucleotide sugar metabolism)	OK	18.809	47.8282	-1.34643	down	0.0057	yes
XLOC_002099	XLOC_002099	ENSBTAT00000036544	PTPLAD1	chr10:12383301-12413275	ENSBTAG00000015155	PTPLAD1	Bos taurus protein tyrosine phosphatase-like A domain containing 1 (PTPLAD1), mRNA. [Source:RefSeq mRNA;Acc:NM_001103316]	GO:0006633(fatty acid biosynthetic process);GO:0006631(fatty acid metabolic process);GO:0005789(endoplasmic reticulum membrane);GO:0006629(lipid metabolic process);GO:0005783(endoplasmic reticulum);GO:0016829(lyase activity);GO:0016021(integral component of membrane);GO:0007254(JNK cascade);GO:0007249(I-kappaB kinase/NF-kappaB signaling);GO:0007266(Rho protein signal transduction);GO:0005515(prot…	NA	OK	54.4342	137.8	-1.33999	down	0.0035	yes
XLOC_033103	XLOC_033103	ENSBTAT00000020331	BAIAP2L2	chr5:110373373-110403013	ENSBTAG00000015290	BAIAP2L2	Brain-specific angiogenesis inhibitor 1-associated protein 2-like protein 2 [Source:UniProtKB/Swiss-Prot;Acc:E1BFE9]	GO:0032956(regulation of actin cytoskeleton organization);GO:0005515(protein binding);GO:0008093(cytoskeletal adaptor activity);GO:0017124(SH3 domain binding);GO:0008289(lipid binding);GO:0030054(cell junction);GO:0007165(signal transduction);GO:0030659(cytoplasmic vesicle membrane);GO:0031410(cytoplasmic vesicle);GO:0005886(plasma membrane);GO:0005543(phospholipid binding);GO:0061024(membrane or…	NA	OK	4.23792	10.717	-1.33847	down	0.0149	yes
XLOC_015364	XLOC_015364	ENSBTAT00000000046	PYCR1	chr19:51567327-51571991	ENSBTAG00000000042	PYCR1	Bos taurus pyrroline-5-carboxylate reductase 1 (PYCR1), mRNA. [Source:RefSeq mRNA;Acc:NM_001014957]	GO:0006561(proline biosynthetic process);GO:0046168(glycerol-3-phosphate catabolic process);GO:0034599(cellular response to oxidative stress);GO:0008652(cellular amino acid biosynthetic process);GO:0051287(NAD binding);GO:0016616(oxidoreductase activity, acting on the CH-OH group of donors, NAD or NADP as acceptor);GO:0006950(response to stress);GO:0055114(oxidation-reduction process);GO:0016491(…	00330(Arginine and proline metabolism)	OK	28.3872	71.679	-1.33631	down	0.0049	yes
XLOC_017133	XLOC_017133	ENSBTAT00000038369	TUBA1D	chr2:107936112-107942525	ENSBTAG00000030973	TUBA1D	Bos taurus tubulin, alpha 3d (TUBA1D), mRNA. [Source:RefSeq mRNA;Acc:NM_001046410]	GO:0051258(protein polymerization);GO:0007017(microtubule-based process);GO:0003924(GTPase activity);GO:0006184(GTP catabolic process);GO:0005525(GTP binding);GO:0043234(protein complex);GO:0005874(microtubule);GO:0005856(cytoskeleton);GO:0005737(cytoplasm);GO:0000166(nucleotide binding);GO:0005200(structural constituent of cytoskeleton)	04145(Phagosome);04540(Gap junction)	OK	8.61223	21.6591	-1.33051	down	0.0098	yes
XLOC_020161	XLOC_020161	ENSBTAT00000004831	SEC23A	chr21:49489516-49571519	ENSBTAG00000003708	SEC23A	Bos taurus Sec23 homolog A (S. cerevisiae) (SEC23A), mRNA. [Source:RefSeq mRNA;Acc:NM_001081604]	GO:0030868(smooth endoplasmic reticulum membrane);GO:0006888(ER to Golgi vesicle-mediated transport);GO:0030127(COPII vesicle coat);GO:0005783(endoplasmic reticulum);GO:0015031(protein transport);GO:0006886(intracellular protein transport);GO:0006810(transport);GO:0005794(Golgi apparatus);GO:0000139(Golgi membrane);GO:0016192(vesicle-mediated transport);GO:0008270(zinc ion binding);GO:0030134(ER …	NA	OK	10.507	26.4227	-1.33043	down	0.0043	yes
XLOC_016812	XLOC_016812	ENSBTAT00000005476;ENSBTAT00000064632	WDSUB1	chr2:37167344-37238559	ENSBTAG00000004184	WDSUB1	WD repeat, sterile alpha motif and U-box domain containing 1 [Source:HGNC Symbol;Acc:HGNC:26697]	GO:0005515(protein binding);GO:0004842(ubiquitin-protein transferase activity);GO:0000151(ubiquitin ligase complex);GO:0016567(protein ubiquitination);GO:0043565(sequence-specific DNA binding);GO:0005634(nucleus)	NA	OK	7.26107	18.2084	-1.32635	down	0.0334	yes
XLOC_031419	XLOC_031419	ENSBTAT00000038204	RNF41	chr5:57416304-57454863	ENSBTAG00000026754	RNF41	E3 ubiquitin-protein ligase NRDP1 [Source:RefSeq peptide;Acc:NP_001039990]	GO:0005515(protein binding);GO:0016881(acid-amino acid ligase activity);GO:0004842(ubiquitin-protein transferase activity);GO:0016567(protein ubiquitination);GO:0046872(metal ion binding);GO:0008270(zinc ion binding);GO:0005135(interleukin-3 receptor binding);GO:0045619(regulation of lymphocyte differentiation);GO:0005128(erythropoietin receptor binding);GO:2000114(regulation of establishment of …	NA	OK	23.9643	59.9772	-1.32353	down	0.01985	yes
XLOC_029795	XLOC_029795	ENSBTAT00000033700	NT5C3	chr4:64128127-64205027	ENSBTAG00000016709	NT5C3	Bos taurus 5'-nucleotidase, cytosolic III (NT5C3), mRNA. [Source:RefSeq mRNA;Acc:NM_001037597]	GO:0008253(5'-nucleotidase activity);GO:0000287(magnesium ion binding);GO:0005737(cytoplasm);GO:0016311(dephosphorylation);GO:0005739(mitochondrion);GO:0005783(endoplasmic reticulum)	00230(Purine metabolism);00240(Pyrimidine metabolism);00760(Nicotinate and nicotinamide metabolism)	OK	7.76098	19.4157	-1.32292	down	0.01845	yes
XLOC_031869	XLOC_031869	ENSBTAT00000023213	ATF4	chr5:111462844-111464936	ENSBTAG00000017462	ATF4	Bos taurus activating transcription factor 4 (tax-responsive enhancer element B67) (ATF4), mRNA. [Source:RefSeq mRNA;Acc:NM_001034342]	GO:0043565(sequence-specific DNA binding);GO:0003700(sequence-specific DNA binding transcription factor activity);GO:0006355(regulation of transcription, DNA-templated);GO:1990440(positive regulation of transcription from RNA polymerase II promoter in response to endoplasmic reticulum stress);GO:0001046(core promoter sequence-specific DNA binding);GO:0032922(circadian regulation of gene expressio…	04010(MAPK signaling pathway);04720(Long-term potentiation);04722(Neurotrophin signaling pathway);04912(GnRH signaling pathway);05215(Prostate cancer)	OK	179.967	449.936	-1.32199	down	0.00485	yes
XLOC_015800	XLOC_015800	-	-	chr19:18845596-18847822	ENSBTAG00000040118	-	Uncharacterized protein [Source:UniProtKB/TrEMBL;Acc:E1BMY6]	GO:0045095(keratin filament);GO:0005882(intermediate filament)	NA	OK	6.07236	15.1794	-1.32179	down	0.0153	yes
XLOC_031482	XLOC_031482	ENSBTAT00000018363	GAS2L3	chr5:64821044-64856203	ENSBTAG00000013822	GAS2L3	growth arrest-specific 2 like 3 [Source:HGNC Symbol;Acc:HGNC:27475]	GO:0005515(protein binding);GO:0007050(cell cycle arrest);GO:0015630(microtubule cytoskeleton);GO:0030036(actin cytoskeleton organization);GO:0015629(actin cytoskeleton);GO:0000226(microtubule cytoskeleton organization);GO:0008017(microtubule binding);GO:0003779(actin binding)	NA	OK	5.28171	13.1832	-1.31962	down	0.0081	yes
XLOC_007097	XLOC_007097	ENSBTAT00000022264	UBE2C	chr13:75306703-75311397	ENSBTAG00000016746	UBE2C	Bos taurus ubiquitin-conjugating enzyme E2C (UBE2C), mRNA. [Source:RefSeq mRNA;Acc:NM_001037449]	GO:0016881(acid-amino acid ligase activity);GO:0070936(protein K48-linked ubiquitination);GO:0004842(ubiquitin-protein transferase activity);GO:0006511(ubiquitin-dependent protein catabolic process);GO:0070979(protein K11-linked ubiquitination);GO:0051301(cell division);GO:0007067(mitotic nuclear division);GO:0005680(anaphase-promoting complex);GO:0007049(cell cycle);GO:0016874(ligase activity);G…	04120(Ubiquitin mediated proteolysis)	OK	109.731	273.407	-1.31708	down	0.00295	yes
XLOC_024186	XLOC_024186	ENSBTAT00000013014	VGF	chr25:36174073-36177586	ENSBTAG00000009868	VGF	VGF nerve growth factor inducible [Source:HGNC Symbol;Acc:HGNC:12684]	GO:0005184(neuropeptide hormone activity);GO:0019953(sexual reproduction);GO:0009409(response to cold);GO:0006091(generation of precursor metabolites and energy);GO:0002021(response to dietary excess);GO:0001541(ovarian follicle development);GO:0032868(response to insulin);GO:0030073(insulin secretion);GO:0042593(glucose homeostasis);GO:0051591(response to cAMP);GO:0031410(cytoplasmic vesicle);GO…	NA	OK	23.7219	59.0602	-1.31597	down	0.0078	yes
XLOC_038502	XLOC_038502	ENSBTAT00000012314	SNAP91	chr9:23745237-23855824	ENSBTAG00000009355	SNAP91	synaptosomal-associated protein, 91kDa [Source:HGNC Symbol;Acc:HGNC:14986]	GO:0048268(clathrin coat assembly);GO:0030276(clathrin binding);GO:0030118(clathrin coat);GO:0005545(1-phosphatidylinositol binding);GO:0005543(phospholipid binding);GO:2000369(regulation of clathrin-mediated endocytosis);GO:0005515(protein binding)	NA	OK	18.1532	45.1926	-1.31586	down	0.0059	yes
XLOC_022997	XLOC_022997	ENSBTAT00000015997	LPIN2	chr24:37558502-37620084	ENSBTAG00000012060	LPIN2	lipin 2 [Source:HGNC Symbol;Acc:HGNC:14450]	GO:0045944(positive regulation of transcription from RNA polymerase II promoter);GO:0003713(transcription coactivator activity);GO:0006629(lipid metabolic process);GO:0016311(dephosphorylation);GO:0005829(cytosol);GO:0005789(endoplasmic reticulum membrane);GO:0008195(phosphatidate phosphatase activity)	NA	OK	24.6748	61.3834	-1.31481	down	0.0064	yes
XLOC_015961	XLOC_015961	ENSBTAT00000003882	FAM64A	chr19:26021969-26026605	ENSBTAG00000002981	FAM64A	family with sequence similarity 64, member A [Source:HGNC Symbol;Acc:HGNC:25483]	GO:0005515(protein binding);GO:0005730(nucleolus);GO:0005737(cytoplasm);GO:0005634(nucleus)	NA	OK	9.82993	24.422	-1.31293	down	0.0132	yes
XLOC_018714	XLOC_018714	ENSBTAT00000002548	MAP1B	chr20:9329854-9419102	ENSBTAG00000001961	MAP1B	Bos taurus microtubule-associated protein 1B (MAP1B), mRNA. [Source:RefSeq mRNA;Acc:NM_001206119]	GO:0000226(microtubule cytoskeleton organization);GO:0008017(microtubule binding);GO:0005874(microtubule);GO:0016787(hydrolase activity);GO:0008152(metabolic process);GO:0061162(establishment of monopolar cell polarity);GO:0001578(microtubule bundle formation);GO:0016358(dendrite development);GO:0014069(postsynaptic density);GO:0047497(mitochondrion transport along microtubule);GO:0045773(positiv…	NA	OK	5.05099	12.4343	-1.29969	down	0.00455	yes
XLOC_025913	XLOC_025913	ENSBTAT00000000187	DDIT4	chr28:28481275-28485410	ENSBTAG00000000163	DDIT4	Bos taurus DNA-damage-inducible transcript 4 (DDIT4), mRNA. [Source:RefSeq mRNA;Acc:NM_001075922]	GO:0033137(negative regulation of peptidyl-serine phosphorylation);GO:0010801(negative regulation of peptidyl-threonine phosphorylation);GO:0001666(response to hypoxia);GO:0008283(cell proliferation);GO:0048011(neurotrophin TRK receptor signaling pathway);GO:0032007(negative regulation of TOR signaling);GO:0007420(brain development);GO:0009968(negative regulation of signal transduction);GO:003018…	04150(mTOR signaling pathway)	OK	62.0569	152.704	-1.29908	down	0.00465	yes
XLOC_037650	XLOC_037650	ENSBTAT00000036525	KCTD9	chr8:73706774-73788052	ENSBTAG00000012382	KCTD9	BTB/POZ domain-containing protein KCTD9 [Source:RefSeq peptide;Acc:NP_001095739]	GO:0005515(protein binding);GO:0051260(protein homooligomerization)	NA	OK	8.3518	20.549	-1.29891	down	0.0062	yes
XLOC_006983	XLOC_006983	ENSBTAT00000010911	PROCR	chr13:65052807-65106553	ENSBTAG00000008291	PROCR	Bos taurus protein C receptor, endothelial (PROCR), mRNA. [Source:RefSeq mRNA;Acc:NM_174437]	GO:0007599(hemostasis);GO:0007596(blood coagulation);GO:0016021(integral component of membrane);GO:0005813(centrosome);GO:0019882(antigen processing and presentation);GO:0016020(membrane);GO:0006955(immune response);GO:0050819(negative regulation of coagulation);GO:0009986(cell surface);GO:0070062(extracellular vesicular exosome);GO:0005515(protein binding);GO:0005925(focal adhesion)	NA	OK	4.12659	10.1471	-1.29805	down	0.02545	yes
XLOC_037418	XLOC_037418	ENSBTAT00000047258	VLDLR	chr8:42109678-42141155	ENSBTAG00000018517	VLDLR	Bos taurus very low density lipoprotein receptor (VLDLR), mRNA. [Source:RefSeq mRNA;Acc:NM_174489]	GO:0005515(protein binding);GO:0016021(integral component of membrane);GO:0005509(calcium ion binding);GO:0038026(reelin-mediated signaling pathway);GO:0038025(reelin receptor activity);GO:1900006(positive regulation of dendrite development);GO:0045860(positive regulation of protein kinase activity);GO:0021517(ventral spinal cord development);GO:0000122(negative regulation of transcription from R…	NA	OK	32.3367	79.29	-1.29396	down	0.0064	yes
XLOC_022497	XLOC_022497	ENSBTAT00000031047	NDC80	chr24:37280099-37313756	ENSBTAG00000021673	NDC80	NDC80 kinetochore complex component [Source:HGNC Symbol;Acc:HGNC:16909]	GO:0007165(signal transduction);GO:0004871(signal transducer activity);GO:0003700(sequence-specific DNA binding transcription factor activity);GO:0006355(regulation of transcription, DNA-templated);GO:0005515(protein binding);GO:0031262(Ndc80 complex);GO:0008608(attachment of spindle microtubules to kinetochore);GO:0000942(condensed nuclear chromosome outer kinetochore);GO:0000132(establishment o…	NA	OK	10.1372	24.7775	-1.28937	down	0.0071	yes
XLOC_024506	XLOC_024506	ENSBTAT00000016909	HOGA1	chr26:18636694-18658256	ENSBTAG00000012721	HOGA1	Bos taurus 4-hydroxy-2-oxoglutarate aldolase 1 (HOGA1), mRNA. [Source:RefSeq mRNA;Acc:NM_001075237]	GO:0005739(mitochondrion);GO:0016829(lyase activity);GO:0008152(metabolic process);GO:0003824(catalytic activity);GO:0033609(oxalate metabolic process);GO:0009436(glyoxylate catabolic process);GO:0042866(pyruvate biosynthetic process);GO:0046487(glyoxylate metabolic process);GO:0019470(4-hydroxyproline catabolic process);GO:0042803(protein homodimerization activity);GO:0070062(extracellular vesic…	NA	OK	7.76561	18.889	-1.28238	down	0.03425	yes
XLOC_038904	XLOC_038904	ENSBTAT00000061538	RPS6KA2	chr9:102916836-103074205	ENSBTAG00000021741	RPS6KA2	ribosomal protein S6 kinase, 90kDa, polypeptide 2 [Source:HGNC Symbol;Acc:HGNC:10431]	GO:0009103(lipopolysaccharide biosynthetic process);GO:0016773(phosphotransferase activity, alcohol group as acceptor);GO:0000287(magnesium ion binding);GO:0004713(protein tyrosine kinase activity);GO:0016772(transferase activity, transferring phosphorus-containing groups);GO:0006468(protein phosphorylation);GO:0004674(protein serine/threonine kinase activity);GO:0004672(protein kinase activity);…	04010(MAPK signaling pathway);04114(Oocyte meiosis);04150(mTOR signaling pathway);04720(Long-term potentiation);04722(Neurotrophin signaling pathway);04914(Progesterone-mediated oocyte maturation)	OK	15.8936	38.5882	-1.27972	down	0.00625	yes
XLOC_010413	XLOC_010413	ENSBTAT00000002967	CD59	chr15:65143829-65181808	ENSBTAG00000002302	CD59	Bos taurus CD59 molecule, complement regulatory protein (CD59), mRNA. [Source:RefSeq mRNA;Acc:NM_001037446]	GO:0007166(cell surface receptor signaling pathway);GO:0009986(cell surface);GO:0005886(plasma membrane);GO:0005576(extracellular region);GO:0030449(regulation of complement activation);GO:0001971(negative regulation of activation of membrane attack complex);GO:0001848(complement binding);GO:0001775(cell activation);GO:0031982(vesicle);GO:0031362(anchored component of external side of plasma memb…	04610(Complement and coagulation cascades);04640(Hematopoietic cell lineage)	OK	31.1433	75.4005	-1.27565	down	0.04295	yes
XLOC_005630	XLOC_005630	ENSBTAT00000022192	ENSBTAG00000016691	chr12:14134639-14146209	NA	NA	NA	NA	NA	OK	9.8833	23.846	-1.27068	down	0.00955	yes
XLOC_030466	XLOC_030466	ENSBTAT00000013950	IFRD1	chr4:55872975-55896662	ENSBTAG00000010549	IFRD1	interferon-related developmental regulator 1 [Source:HGNC Symbol;Acc:HGNC:5456]	GO:0007527(adult somatic muscle development);GO:0042692(muscle cell differentiation);GO:0005634(nucleus);GO:0005488(binding)	NA	OK	23.0778	55.6654	-1.27028	down	0.00685	yes
XLOC_016362	XLOC_016362	ENSBTAT00000066075;ENSBTAT00000034753	KANSL1	chr19:46649373-46775925	ENSBTAG00000012564	KANSL1	KAT8 regulatory NSL complex subunit 1 [Source:HGNC Symbol;Acc:HGNC:24565]	GO:0046972(histone acetyltransferase activity (H4-K16 specific));GO:0043996(histone acetyltransferase activity (H4-K8 specific));GO:0043995(histone acetyltransferase activity (H4-K5 specific));GO:0043982(histone H4-K8 acetylation);GO:0043981(histone H4-K5 acetylation);GO:0071339(MLL1 complex);GO:0043984(histone H4-K16 acetylation);GO:0005515(protein binding);GO:0000123(histone acetyltransferase c…	NA	OK	14.738	35.4274	-1.26532	down	0.0057	yes
XLOC_015390	XLOC_015390	ENSBTAT00000020308;ENSBTAT00000056223	SGSH	chr19:53041243-53048384	ENSBTAG00000015267	SGSH	Bos taurus N-sulfoglucosamine sulfohydrolase (SGSH), mRNA. [Source:RefSeq mRNA;Acc:NM_001102189]	GO:0008484(sulfuric ester hydrolase activity);GO:0008152(metabolic process);GO:0003824(catalytic activity);GO:0005515(protein binding);GO:0070062(extracellular vesicular exosome)	00531(Glycosaminoglycan degradation);04142(Lysosome)	OK	10.1865	24.4723	-1.26449	down	0.0093	yes
XLOC_037701	XLOC_037701	ENSBTAT00000012912	GKAP1	chr8:78327712-78419196	ENSBTAG00000023523	GKAP1	Bos taurus G kinase anchoring protein 1 (GKAP1), mRNA. [Source:RefSeq mRNA;Acc:NM_001040573]	GO:0007165(signal transduction);GO:0005794(Golgi apparatus);GO:0005515(protein binding)	NA	OK	6.65994	15.9494	-1.25992	down	0.01525	yes
XLOC_031957	XLOC_031957	ENSBTAT00000016040	FBLN1	chr5:116616199-116695692	ENSBTAG00000012088	FBLN1	Bos taurus fibulin 1 (FBLN1), mRNA. [Source:RefSeq mRNA;Acc:NM_001098029]	GO:0005515(protein binding);GO:0005578(proteinaceous extracellular matrix);GO:0005509(calcium ion binding);GO:0016504(peptidase activator activity);GO:0010952(positive regulation of peptidase activity);GO:0005604(basement membrane);GO:0030198(extracellular matrix organization);GO:0005576(extracellular region);GO:0070062(extracellular vesicular exosome);GO:0031012(extracellular matrix);GO:0005615(…	NA	OK	7.47645	17.8541	-1.25583	down	0.0118	yes
XLOC_028484	XLOC_028484	ENSBTAT00000009536	NUF2	chr3:6033715-6072026	ENSBTAG00000007247	NUF2	Bos taurus NUF2, NDC80 kinetochore complex component, homolog (S. cerevisiae) (NUF2), mRNA. [Source:RefSeq mRNA;Acc:NM_001099011]	GO:0000775(chromosome, centromeric region);GO:0007067(mitotic nuclear division);GO:0031262(Ndc80 complex);GO:0005515(protein binding);GO:0016020(membrane)	NA	OK	7.01787	16.7539	-1.2554	down	0.01375	yes
XLOC_026327	XLOC_026327	ENSBTAT00000030378	SYTL2	chr29:9806834-9927317	ENSBTAG00000000460	SYTL2	synaptotagmin-like 2 [Source:HGNC Symbol;Acc:HGNC:15585]	GO:0005515(protein binding);GO:0006887(exocytosis);GO:0017137(Rab GTPase binding);GO:0006886(intracellular protein transport);GO:0070257(positive regulation of mucus secretion);GO:0042043(neurexin family protein binding);GO:0042470(melanosome);GO:0016020(membrane);GO:0019897(extrinsic component of plasma membrane);GO:0005886(plasma membrane);GO:0070382(exocytic vesicle);GO:0001786(phosphatidylser…	NA	OK	20.9524	49.9586	-1.25362	down	0.0074	yes
XLOC_018868	XLOC_018868	-	-	chr20:26112205-26112914	ENSBTAG00000040118	-	Uncharacterized protein [Source:UniProtKB/TrEMBL;Acc:E1BMY6]	GO:0045095(keratin filament);GO:0005882(intermediate filament)	NA	OK	37.5376	89.4714	-1.25309	down	0.01245	yes
XLOC_031532	XLOC_031532	ENSBTAT00000013932	TOM1	chr5:73905554-73946203	ENSBTAG00000045785	TOM1	Bos taurus target of myb1 (chicken) (TOM1), mRNA. [Source:RefSeq mRNA;Acc:NM_001035015]	GO:0005622(intracellular);GO:0006886(intracellular protein transport);GO:0030276(clathrin binding);GO:0005769(early endosome);GO:0070062(extracellular vesicular exosome);GO:0005515(protein binding);GO:0005768(endosome);GO:0005829(cytosol);GO:0005737(cytoplasm);GO:0016020(membrane)	NA	OK	64.534	153.75	-1.25245	down	0.00705	yes
XLOC_037616	XLOC_037616	ENSBTAT00000012505	REEP4	chr8:69953830-69957914	ENSBTAG00000009504	REEP4	Bos taurus receptor accessory protein 4 (REEP4), mRNA. [Source:RefSeq mRNA;Acc:NM_001034533]	GO:0051301(cell division);GO:0007067(mitotic nuclear division);GO:0005789(endoplasmic reticulum membrane);GO:0005783(endoplasmic reticulum);GO:0007049(cell cycle);GO:0008017(microtubule binding);GO:0005874(microtubule);GO:0016021(integral component of membrane);GO:0016020(membrane);GO:0007084(mitotic nuclear envelope reassembly);GO:0006998(nuclear envelope organization)	NA	OK	15.1824	36.1153	-1.25021	down	0.02305	yes
XLOC_025892	XLOC_025892	ENSBTAT00000047413	SGPL1	chr28:27132630-27186896	ENSBTAG00000009984	SGPL1	Bos taurus sphingosine-1-phosphate lyase 1 (SGPL1), mRNA. [Source:RefSeq mRNA;Acc:NM_001098053]	GO:0019752(carboxylic acid metabolic process);GO:0016831(carboxy-lyase activity);GO:0030170(pyridoxal phosphate binding);GO:0016829(lyase activity);GO:0009058(biosynthetic process);GO:0008152(metabolic process);GO:0003824(catalytic activity);GO:0006807(nitrogen compound metabolic process);GO:0008210(estrogen metabolic process);GO:0008209(androgen metabolic process);GO:0033327(Leydig cell differen…	00600(Sphingolipid metabolism)	OK	6.32653	15.0477	-1.25006	down	0.00795	yes
XLOC_015184	XLOC_015184	ENSBTAT00000011361	IGFBP4	chr19:41326677-41338255	ENSBTAG00000008611	IGFBP4	Bos taurus insulin-like growth factor binding protein 4 (IGFBP4), mRNA. [Source:RefSeq mRNA;Acc:NM_174557]	GO:0019838(growth factor binding);GO:0005520(insulin-like growth factor binding);GO:0001558(regulation of cell growth);GO:0044342(type B pancreatic cell proliferation);GO:0040008(regulation of growth);GO:0043568(positive regulation of insulin-like growth factor receptor signaling pathway);GO:0043410(positive regulation of MAPK cascade);GO:0010906(regulation of glucose metabolic process);GO:000561…	NA	OK	15.6044	37.0882	-1.24901	down	0.01145	yes
XLOC_034326	XLOC_034326	ENSBTAT00000014447	MSX1	chr6:106061462-106065759	ENSBTAG00000010875	MSX1	Bos taurus msh homeobox 1 (MSX1), mRNA. [Source:RefSeq mRNA;Acc:NM_174798]	GO:0000976(transcription regulatory region sequence-specific DNA binding);GO:0043565(sequence-specific DNA binding);GO:0003700(sequence-specific DNA binding transcription factor activity);GO:0003677(DNA binding);GO:0006355(regulation of transcription, DNA-templated);GO:0005634(nucleus);GO:0090427(activation of meiosis);GO:0061312(BMP signaling pathway involved in heart development);GO:0042481(reg…	NA	OK	21.3432	50.6931	-1.24801	down	0.0088	yes
XLOC_026069	XLOC_026069	ENSBTAT00000063370	IRF2BP2	chr28:7444900-7446967	ENSBTAG00000046841	IRF2BP2	interferon regulatory factor 2 binding protein 2 [Source:HGNC Symbol;Acc:HGNC:21729]	GO:0005654(nucleoplasm);GO:0005634(nucleus)	NA	OK	58.4925	138.818	-1.24688	down	0.01065	yes
XLOC_028271	XLOC_028271	ENSBTAT00000012331	RRAGC	chr3:107709127-107725227	ENSBTAG00000009368	RRAGC	Bos taurus Ras-related GTP binding C (RRAGC), mRNA. [Source:RefSeq mRNA;Acc:NM_001076456]	GO:0005525(GTP binding);GO:0005634(nucleus);GO:0005737(cytoplasm);GO:0019003(GDP binding);GO:0005654(nucleoplasm);GO:0043231(intracellular membrane-bounded organelle);GO:0005515(protein binding);GO:0046982(protein heterodimerization activity);GO:0003924(GTPase activity);GO:0005764(lysosome)	NA	OK	17.3247	41.0675	-1.24517	down	0.00615	yes
XLOC_030479	XLOC_030479	ENSBTAT00000046371	ANLN	chr4:61164854-61242549	ENSBTAG00000009218	ANLN	anillin, actin binding protein [Source:HGNC Symbol;Acc:HGNC:14082]	GO:0002244(hematopoietic progenitor cell differentiation);GO:0090521(glomerular visceral epithelial cell migration);GO:0005826(actomyosin contractile ring);GO:0005654(nucleoplasm);GO:0043231(intracellular membrane-bounded organelle);GO:0015629(actin cytoskeleton);GO:0000281(mitotic cytokinesis);GO:0003779(actin binding)	NA	OK	36.635	86.842	-1.24517	down	0.0146	yes
XLOC_001656	XLOC_001656	ENSBTAT00000012206	MFSD1	chr1:109560437-109587028	ENSBTAG00000009263	MFSD1	Bos taurus major facilitator superfamily domain containing 1 (MFSD1), mRNA. [Source:RefSeq mRNA;Acc:NM_001075351]	GO:0055085(transmembrane transport);GO:0006810(transport);GO:0016021(integral component of membrane);GO:0016020(membrane)	NA	OK	17.8528	42.2446	-1.24261	down	0.0099	yes
XLOC_018867	XLOC_018867	-	-	chr20:26109750-26111882	ENSBTAG00000040118	-	Uncharacterized protein [Source:UniProtKB/TrEMBL;Acc:E1BMY6]	GO:0045095(keratin filament);GO:0005882(intermediate filament)	NA	OK	27.6617	65.341	-1.2401	down	0.0093	yes
XLOC_024923	XLOC_024923	ENSBTAT00000063883	SCD	chr26:21140985-21148703	ENSBTAG00000045728	SCD	Bos taurus stearoyl-CoA desaturase (delta-9-desaturase) (SCD), mRNA. [Source:RefSeq mRNA;Acc:NM_173959]	GO:0016717(oxidoreductase activity, acting on paired donors, with oxidation of a pair of donors resulting in the reduction of molecular oxygen to two molecules of water);GO:0005506(iron ion binding);GO:0006633(fatty acid biosynthetic process);GO:0006631(fatty acid metabolic process);GO:0005789(endoplasmic reticulum membrane);GO:0006629(lipid metabolic process);GO:0055114(oxidation-reduction proce…	NA	OK	102.751	241.945	-1.23553	down	0.00905	yes
XLOC_005262	XLOC_005262	ENSBTAT00000032931	ENSBTAG00000023938	chr11:72781233-72787461	ENSBTAG00000023938	-	Bos taurus centromere protein A (CENPA), mRNA. [Source:RefSeq mRNA;Acc:NM_001205380]	GO:0006334(nucleosome assembly);GO:0000786(nucleosome);GO:0046982(protein heterodimerization activity);GO:0005694(chromosome);GO:0003677(DNA binding);GO:0005634(nucleus)	NA	OK	26.0734	61.2953	-1.2332	down	0.00895	yes
XLOC_018870	XLOC_018870	ENSBTAT00000034583	ITGA1	chr20:26115417-26227619	ENSBTAG00000016525	ITGA1	integrin, alpha 1 [Source:HGNC Symbol;Acc:HGNC:6134]	GO:0008305(integrin complex);GO:0007229(integrin-mediated signaling pathway);GO:0007155(cell adhesion);GO:0016021(integral component of membrane);GO:0042059(negative regulation of epidermal growth factor receptor signaling pathway);GO:0045178(basal part of cell);GO:0045123(cellular extravasation);GO:0030593(neutrophil chemotaxis);GO:0009986(cell surface);GO:0009897(external side of plasma membran…	NA	OK	45.851	107.737	-1.23249	down	0.0079	yes
XLOC_007623	XLOC_007623	ENSBTAT00000021569	TGM2	chr13:67662602-67697657	ENSBTAG00000016208	TGM2	Bos taurus transglutaminase 2 (C polypeptide, protein-glutamine-gamma-glutamyltransferase) (TGM2), mRNA. [Source:RefSeq mRNA;Acc:NM_177507]	GO:0018149(peptide cross-linking);GO:0003810(protein-glutamine gamma-glutamyltransferase activity);GO:0016746(transferase activity, transferring acyl groups);GO:0016740(transferase activity);GO:0046872(metal ion binding);GO:0051561(positive regulation of mitochondrial calcium ion concentration);GO:0060662(salivary gland cavitation);GO:0032471(negative regulation of endoplasmic reticulum calcium i…	05016(Huntington's disease)	OK	18.6354	43.5935	-1.22607	down	0.00845	yes
XLOC_011842	XLOC_011842	ENSBTAT00000011265	ATF3	chr16:72820025-72832974	ENSBTAG00000008545	ATF3	Bos taurus activating transcription factor 3 (ATF3), mRNA. [Source:RefSeq mRNA;Acc:NM_001046193]	GO:0043565(sequence-specific DNA binding);GO:0006351(transcription, DNA-templated);GO:0003700(sequence-specific DNA binding transcription factor activity);GO:0003677(DNA binding);GO:0006355(regulation of transcription, DNA-templated);GO:0005634(nucleus);GO:0001078(RNA polymerase II core promoter proximal region sequence-specific DNA binding transcription factor activity involved in negative regul…	NA	OK	57.7692	135.059	-1.22522	down	0.00875	yes
XLOC_008778	XLOC_008778	ENSBTAT00000046176	SPAG1	chr14:66319196-66406176	ENSBTAG00000032544	SPAG1	sperm associated antigen 1 [Source:HGNC Symbol;Acc:HGNC:11212]	GO:0005515(protein binding);GO:0015630(microtubule cytoskeleton);GO:0005654(nucleoplasm);GO:0005737(cytoplasm)	NA	OK	13.4461	31.4298	-1.22494	down	0.01405	yes
XLOC_028513	XLOC_028513	ENSBTAT00000061124	PPOX	chr3:8345629-8349567	ENSBTAG00000021894	PPOX	Bos taurus protoporphyrinogen oxidase (PPOX), mRNA. [Source:RefSeq mRNA;Acc:NM_001192426]	GO:0006782(protoporphyrinogen IX biosynthetic process);GO:0006783(heme biosynthetic process);GO:0006779(porphyrin-containing compound biosynthetic process);GO:0055114(oxidation-reduction process);GO:0016491(oxidoreductase activity);GO:0005743(mitochondrial inner membrane);GO:0005739(mitochondrion);GO:0016020(membrane);GO:0031966(mitochondrial membrane);GO:0004729(oxygen-dependent protoporphyrinog…	00860(Porphyrin and chlorophyll metabolism)	OK	18.4471	42.9305	-1.21861	down	0.01055	yes
XLOC_013198	XLOC_013198	ENSBTAT00000005727	NFATC3	chr18:35640459-35734469	ENSBTAG00000004368	NFATC3	nuclear factor of activated T-cells, cytoplasmic, calcineurin-dependent 3 [Source:HGNC Symbol;Acc:HGNC:7777]	GO:0005515(protein binding);GO:0003700(sequence-specific DNA binding transcription factor activity);GO:0006355(regulation of transcription, DNA-templated);GO:0005634(nucleus);GO:0055001(muscle cell development);GO:0071285(cellular response to lithium ion);GO:0051145(smooth muscle cell differentiation);GO:0045333(cellular respiration);GO:0007507(heart development);GO:0001569(patterning of blood ve…	04310(Wnt signaling pathway);04360(Axon guidance);04370(VEGF signaling pathway);04650(Natural killer cell mediated cytotoxicity);04660(T cell receptor signaling pathway);04662(B cell receptor signaling pathway)	OK	6.98965	16.2656	-1.21853	down	0.01	yes
XLOC_015058	XLOC_015058	ENSBTAT00000010372	SREBF1	chr19:35234550-35251209	ENSBTAG00000007884	SREBF1	Bos taurus sterol regulatory element binding transcription factor 1 (SREBF1), mRNA. [Source:RefSeq mRNA;Acc:NM_001113302]	GO:0046983(protein dimerization activity);GO:0045542(positive regulation of cholesterol biosynthetic process);GO:0003062(regulation of heart rate by chemical signal);GO:0031065(positive regulation of histone deacetylation);GO:0010867(positive regulation of triglyceride biosynthetic process);GO:0019217(regulation of fatty acid metabolic process);GO:0008286(insulin receptor signaling pathway);GO:00…	04910(Insulin signaling pathway)	OK	62.1607	144.535	-1.21734	down	0.0064	yes
XLOC_002707	XLOC_002707	ENSBTAT00000043753	LGALS3	chr10:67843327-67861113	ENSBTAG00000002326	LGALS3	Bos taurus lectin, galactoside-binding, soluble, 3 (LGALS3), mRNA. [Source:RefSeq mRNA;Acc:NM_001102341]	GO:0030246(carbohydrate binding);GO:0005578(proteinaceous extracellular matrix);GO:0030198(extracellular matrix organization);GO:0001501(skeletal system development);GO:0009897(external side of plasma membrane);GO:0005515(protein binding);GO:0005737(cytoplasm);GO:0005634(nucleus);GO:1902041(regulation of extrinsic apoptotic signaling pathway via death domain receptors);GO:0071674(mononuclear cell…	NA	OK	389.649	903.635	-1.21357	down	0.0117	yes
XLOC_025848	XLOC_025848	-	-	chr28:18194621-18195877	ENSBTAG00000040118	-	Uncharacterized protein [Source:UniProtKB/TrEMBL;Acc:E1BMY6]	GO:0045095(keratin filament);GO:0005882(intermediate filament)	NA	OK	20.4463	47.3814	-1.21248	down	0.01565	yes
XLOC_023957	XLOC_023957	ENSBTAT00000007071	CPPED1	chr25:11461992-11602974	ENSBTAG00000007142	CPPED1	Bos taurus calcineurin-like phosphoesterase domain containing 1 (CPPED1), mRNA. [Source:RefSeq mRNA;Acc:NM_001031771]	GO:0004721(phosphoprotein phosphatase activity);GO:0046872(metal ion binding);GO:0016787(hydrolase activity);GO:0008152(metabolic process);GO:0005737(cytoplasm);GO:0016311(dephosphorylation);GO:0070062(extracellular vesicular exosome)	NA	OK	52.2785	120.811	-1.20846	down	0.00945	yes
XLOC_039427	XLOC_039427	ENSBTAT00000017618	HDAC6	chrX:91994291-92013213	ENSBTAG00000013244	HDAC6	histone deacetylase 6 [Source:HGNC Symbol;Acc:HGNC:14064]	GO:0016787(hydrolase activity);GO:0008270(zinc ion binding);GO:0090042(tubulin deacetylation);GO:0071218(cellular response to misfolded protein);GO:0070846(Hsp90 deacetylation);GO:0070842(aggresome assembly);GO:0070201(regulation of establishment of protein localization);GO:0045598(regulation of fat cell differentiation);GO:0043241(protein complex disassembly);GO:0043162(ubiquitin-dependent prote…	NA	OK	9.37105	21.611	-1.20549	down	0.01175	yes
XLOC_003369	XLOC_003369	-	-	chr10:26646564-26647288	ENSBTAG00000040118	-	Uncharacterized protein [Source:UniProtKB/TrEMBL;Acc:E1BMY6]	GO:0045095(keratin filament);GO:0005882(intermediate filament)	NA	OK	21.9322	50.5212	-1.20384	down	0.0219	yes
XLOC_027839	XLOC_027839	ENSBTAT00000028276	COL11A1	chr3:40448663-40682012	ENSBTAG00000021217	COL11A1	Bos taurus collagen, type XI, alpha 1 (COL11A1), mRNA. [Source:RefSeq mRNA;Acc:NM_001166509]	GO:0005201(extracellular matrix structural constituent);GO:0005581(collagen trimer);GO:0002063(chondrocyte development);GO:0006029(proteoglycan metabolic process);GO:0035989(tendon development);GO:0001502(cartilage condensation);GO:0031012(extracellular matrix);GO:0055010(ventricular cardiac muscle tissue morphogenesis);GO:0048705(skeletal system morphogenesis);GO:0048704(embryonic skeletal syste…	04510(Focal adhesion);04512(ECM-receptor interaction)	OK	33.9214	78.0215	-1.20168	down	0.00845	yes
XLOC_027380	XLOC_027380	ENSBTAT00000015933	OLFML2B	chr3:7527737-7577290	ENSBTAG00000034147	OLFML2B	Bos taurus olfactomedin-like 2B (OLFML2B), mRNA. [Source:RefSeq mRNA;Acc:NM_001100354]	GO:0005515(protein binding);GO:0050840(extracellular matrix binding);GO:0031012(extracellular matrix);GO:0030198(extracellular matrix organization);GO:0005576(extracellular region)	NA	OK	10.0755	23.0913	-1.1965	down	0.01225	yes
XLOC_035060	XLOC_035060	ENSBTAT00000011539	KIF20A	chr7:51185665-51222637	ENSBTAG00000008758	KIF20A	Bos taurus kinesin family member 20A (KIF20A), mRNA. [Source:RefSeq mRNA;Acc:NM_001046288]	GO:0000910(cytokinesis);GO:0005819(spindle);GO:0001578(microtubule bundle formation);GO:0007165(signal transduction);GO:0008017(microtubule binding);GO:0007018(microtubule-based movement);GO:0005874(microtubule);GO:0005871(kinesin complex);GO:0005856(cytoskeleton);GO:0003777(microtubule motor activity);GO:0015031(protein transport);GO:0006810(transport);GO:0005794(Golgi apparatus);GO:0008152(meta…	NA	OK	49.0524	112.413	-1.19642	down	0.02165	yes
XLOC_039262	XLOC_039262	ENSBTAT00000018239	ATG4A	chrX:60973683-61051097	ENSBTAG00000013724	ATG4A	Bos taurus ATG4 autophagy related 4 homolog A (S. cerevisiae) (ATG4A), mRNA. [Source:RefSeq mRNA;Acc:NM_001001171]	GO:0006914(autophagy);GO:0008234(cysteine-type peptidase activity);GO:0008233(peptidase activity);GO:0006508(proteolysis);GO:0015031(protein transport);GO:0006810(transport);GO:0016787(hydrolase activity);GO:0005737(cytoplasm)	04140(Regulation of autophagy)	OK	4.81885	11.0265	-1.19421	down	0.03355	yes
XLOC_000538	XLOC_000538	ENSBTAT00000019858	ETV5	chr1:81725685-81784999	ENSBTAG00000014915	ETV5	ets variant 5 [Source:HGNC Symbol;Acc:HGNC:3494]	GO:0043565(sequence-specific DNA binding);GO:0030154(cell differentiation);GO:0006366(transcription from RNA polymerase II promoter);GO:0006357(regulation of transcription from RNA polymerase II promoter);GO:0003700(sequence-specific DNA binding transcription factor activity);GO:0003677(DNA binding);GO:0000981(sequence-specific DNA binding RNA polymerase II transcription factor activity);GO:00063…	NA	OK	4.72765	10.805	-1.1925	down	0.01645	yes
XLOC_018464	XLOC_018464	-	-	chr20:31784044-31792324	ENSBTAG00000040118	-	Uncharacterized protein [Source:UniProtKB/TrEMBL;Acc:E1BMY6]	GO:0045095(keratin filament);GO:0005882(intermediate filament)	NA	OK	46.1814	105.5	-1.19186	down	0.016	yes
XLOC_021483	XLOC_021483	ENSBTAT00000023678	EFHC1	chr23:24588031-24627769	ENSBTAG00000017810	EFHC1	Bos taurus EF-hand domain (C-terminal) containing 1 (EFHC1), mRNA. [Source:RefSeq mRNA;Acc:NM_001192244]	GO:0005509(calcium ion binding);GO:0005929(cilium);GO:0021795(cerebral cortex cell migration);GO:0072686(mitotic spindle);GO:0005813(centrosome)	NA	OK	5.8619	13.385	-1.19118	down	0.02155	yes
XLOC_038693	XLOC_038693	ENSBTAT00000020443;ENSBTAT00000046411	ARHGAP18	chr9:68712247-68845226	ENSBTAG00000015381	ARHGAP18	Bos taurus Rho GTPase activating protein 18 (ARHGAP18), mRNA. [Source:RefSeq mRNA;Acc:NM_001110772]	GO:0007165(signal transduction);GO:0005622(intracellular)	NA	OK	14.2218	32.4425	-1.18978	down	0.01225	yes
XLOC_022474	XLOC_022474	ENSBTAT00000020219	NPC1	chr24:33438418-33507301	ENSBTAG00000015195	NPC1	Bos taurus Niemann-Pick disease, type C1 (NPC1), mRNA. [Source:RefSeq mRNA;Acc:NM_174758]	GO:0007165(signal transduction);GO:0016021(integral component of membrane);GO:0071404(cellular response to low-density lipoprotein particle stimulus);GO:0033344(cholesterol efflux);GO:0071383(cellular response to steroid hormone stimulus);GO:0016242(negative regulation of macroautophagy);GO:0006897(endocytosis);GO:0006486(protein glycosylation);GO:0005764(lysosome);GO:0045121(membrane raft);GO:00…	04142(Lysosome)	OK	32.7513	74.7039	-1.18963	down	0.0269	yes
XLOC_003882	XLOC_003882	-	-	chr10:93900535-93901821	ENSBTAG00000040118	-	Uncharacterized protein [Source:UniProtKB/TrEMBL;Acc:E1BMY6]	GO:0045095(keratin filament);GO:0005882(intermediate filament)	NA	OK	11.2467	25.6484	-1.18936	down	0.0227	yes
XLOC_017952	XLOC_017952	ENSBTAT00000011485	SERPINE2	chr2:112870140-112940179	ENSBTAG00000008717	SERPINE2	serpin peptidase inhibitor, clade E (nexin, plasminogen activator inhibitor type 1), member 2 [Source:HGNC Symbol;Acc:HGNC:8951]	GO:0005615(extracellular space);GO:0061108(seminal vesicle epithelium development);GO:0050974(detection of mechanical stimulus involved in sensory perception);GO:0021683(cerebellar granular layer morphogenesis);GO:0033363(secretory granule organization);GO:0010757(negative regulation of plasminogen activation);GO:0010544(negative regulation of platelet activation);GO:0032940(secretion by cell);GO…	NA	OK	34.9681	79.6261	-1.1872	down	0.0112	yes
XLOC_002948	XLOC_002948	-	-	chr10:86297445-86298168	ENSBTAG00000040118	-	Uncharacterized protein [Source:UniProtKB/TrEMBL;Acc:E1BMY6]	GO:0045095(keratin filament);GO:0005882(intermediate filament)	NA	OK	22.8148	51.828	-1.18376	down	0.02805	yes
XLOC_012987	XLOC_012987	ENSBTAT00000002717	PLCG2	chr18:8427453-8518657	ENSBTAG00000002103	PLCG2	phospholipase C, gamma 2 (phosphatidylinositol-specific) [Source:HGNC Symbol;Acc:HGNC:9066]	GO:0005515(protein binding);GO:0009395(phospholipid catabolic process);GO:0008081(phosphoric diester hydrolase activity);GO:0016042(lipid catabolic process);GO:0006629(lipid metabolic process);GO:0007165(signal transduction);GO:0004871(signal transducer activity);GO:0035556(intracellular signal transduction);GO:0016787(hydrolase activity);GO:0002316(follicular B cell differentiation);GO:0032959(i…	NA	OK	11.663	26.4892	-1.18346	down	0.00945	yes
XLOC_007956	XLOC_007956	ENSBTAT00000021554	FBXO32	chr14:17919480-17953491	ENSBTAG00000016194	FBXO32	Bos taurus F-box protein 32 (FBXO32), mRNA. [Source:RefSeq mRNA;Acc:NM_001046155]	GO:0005515(protein binding);GO:0016567(protein ubiquitination);GO:0005634(nucleus);GO:0005737(cytoplasm);GO:0014894(response to denervation involved in regulation of muscle adaptation);GO:0071549(cellular response to dexamethasone stimulus);GO:0030018(Z disc);GO:0005730(nucleolus)	NA	OK	4.66316	10.5694	-1.18051	down	0.04575	yes
XLOC_036429	XLOC_036429	ENSBTAT00000028055	PBK	chr8:10819970-10852941	ENSBTAG00000021069	PBK	Bos taurus PDZ binding kinase (PBK), mRNA. [Source:RefSeq mRNA;Acc:NM_001102178]	GO:0004713(protein tyrosine kinase activity);GO:0016772(transferase activity, transferring phosphorus-containing groups);GO:0006468(protein phosphorylation);GO:0004674(protein serine/threonine kinase activity);GO:0004672(protein kinase activity);GO:0005524(ATP binding)	NA	OK	19.9618	45.182	-1.1785	down	0.01175	yes
XLOC_024922	XLOC_024922	-	-	chr26:21137940-21138311	ENSBTAG00000040118	-	Uncharacterized protein [Source:UniProtKB/TrEMBL;Acc:E1BMY6]	GO:0045095(keratin filament);GO:0005882(intermediate filament)	NA	OK	184.7	417.824	-1.17771	down	0.0166	yes
XLOC_029889	XLOC_029889	ENSBTAT00000053426	IGFBP3	chr4:76705104-76712709	ENSBTAG00000003994	IGFBP3	Bos taurus insulin-like growth factor binding protein 3 (IGFBP3), mRNA. [Source:RefSeq mRNA;Acc:NM_174556]	GO:0019838(growth factor binding);GO:0043065(positive regulation of apoptotic process);GO:0005520(insulin-like growth factor binding);GO:0001558(regulation of cell growth);GO:0043085(positive regulation of catalytic activity);GO:0001968(fibronectin binding);GO:0044342(type B pancreatic cell proliferation);GO:0040008(regulation of growth);GO:0001649(osteoblast differentiation);GO:0043568(positive …	04115(p53 signaling pathway)	OK	34.5422	77.9463	-1.17412	down	0.0109	yes
XLOC_026780	XLOC_026780	ENSBTAT00000014273	CARS	chr29:49202353-49254992	ENSBTAG00000010777	CARS	Bos taurus cysteinyl-tRNA synthetase (CARS), mRNA. [Source:RefSeq mRNA;Acc:NM_001103249]	GO:0006423(cysteinyl-tRNA aminoacylation);GO:0004817(cysteine-tRNA ligase activity);GO:0005829(cytosol);GO:0006418(tRNA aminoacylation for protein translation);GO:0004812(aminoacyl-tRNA ligase activity);GO:0005524(ATP binding);GO:0000166(nucleotide binding);GO:0042803(protein homodimerization activity);GO:0000049(tRNA binding);GO:0005515(protein binding);GO:0005737(cytoplasm)	00970(Aminoacyl-tRNA biosynthesis)	OK	41.3757	93.2583	-1.17245	down	0.0101	yes
XLOC_037741	XLOC_037741	ENSBTAT00000001290	IARS	chr8:85268889-85350117	ENSBTAG00000000974	IARS	Bos taurus isoleucyl-tRNA synthetase (IARS), mRNA. [Source:RefSeq mRNA;Acc:NM_001101069]	GO:0006428(isoleucyl-tRNA aminoacylation);GO:0004822(isoleucine-tRNA ligase activity);GO:0006450(regulation of translational fidelity);GO:0006418(tRNA aminoacylation for protein translation);GO:0004812(aminoacyl-tRNA ligase activity);GO:0002161(aminoacyl-tRNA editing activity);GO:0005737(cytoplasm);GO:0005524(ATP binding);GO:0000166(nucleotide binding);GO:0001649(osteoblast differentiation);GO:00…	00290(Valine, leucine and isoleucine biosynthesis);00970(Aminoacyl-tRNA biosynthesis)	OK	38.2769	85.918	-1.16649	down	0.0128	yes
XLOC_039920	XLOC_039920	ENSBTAT00000064844	RENBP	chrX:40063721-40071077	ENSBTAG00000047827	RENBP	N-acylglucosamine 2-epimerase [Source:RefSeq peptide;Acc:NP_001039688]	GO:0003824(catalytic activity);GO:0050121(N-acylglucosamine 2-epimerase activity);GO:0006044(N-acetylglucosamine metabolic process);GO:0070062(extracellular vesicular exosome)	NA	OK	36.2276	81.0899	-1.16243	down	0.01375	yes
XLOC_024895	XLOC_024895	ENSBTAT00000032947	AVPI1	chr26:18711831-18720308	ENSBTAG00000023947	AVPI1	Bos taurus arginine vasopressin-induced 1 (AVPI1), mRNA. [Source:RefSeq mRNA;Acc:NM_001034760]	GO:0007049(cell cycle);GO:0000187(activation of MAPK activity)	NA	OK	71.7502	160.268	-1.15943	down	0.01155	yes
XLOC_036933	XLOC_036933	ENSBTAT00000050448	ENSBTAG00000035958	chr8:70787213-70817371	ENSBTAG00000035958	-	Uncharacterized protein [Source:UniProtKB/TrEMBL;Acc:F1MZJ4]	GO:0005515(protein binding);GO:0006184(GTP catabolic process);GO:0007264(small GTPase mediated signal transduction);GO:0005525(GTP binding);GO:0007165(signal transduction);GO:0005622(intracellular);GO:0015031(protein transport);GO:0000166(nucleotide binding);GO:0016020(membrane)	04120(Ubiquitin mediated proteolysis)	OK	6.67767	14.8841	-1.15636	down	0.0314	yes
XLOC_001397	XLOC_001397	ENSBTAT00000009121	CCDC50	chr1:76544289-76624546	ENSBTAG00000006945	CCDC50	coiled-coil domain containing 50 [Source:HGNC Symbol;Acc:HGNC:18111]	GO:0005515(protein binding);GO:0031625(ubiquitin protein ligase binding);GO:0005737(cytoplasm)	NA	OK	28.6105	63.6292	-1.15314	down	0.0164	yes
XLOC_025847	XLOC_025847	ENSBTAT00000008847	ARID5B	chr28:18003559-18194471	ENSBTAG00000006729	ARID5B	AT rich interactive domain 5B (MRF1-like) [Source:HGNC Symbol;Acc:HGNC:17362]	GO:0005622(intracellular);GO:0003677(DNA binding);GO:0005634(nucleus);GO:0060613(fat pad development);GO:0006807(nitrogen compound metabolic process);GO:0030325(adrenal gland development);GO:0048644(muscle organ morphogenesis);GO:0048468(cell development);GO:0048008(platelet-derived growth factor receptor signaling pathway);GO:0001822(kidney development);GO:0060325(face morphogenesis);GO:0048705(…	NA	OK	18.0949	40.1288	-1.14905	down	0.0144	yes
XLOC_005904	XLOC_005904	-	-	chr12:74453820-74520375	ENSBTAG00000040118	-	Uncharacterized protein [Source:UniProtKB/TrEMBL;Acc:E1BMY6]	GO:0045095(keratin filament);GO:0005882(intermediate filament)	NA	OK	6.78642	15.0438	-1.14845	down	0.0243	yes
XLOC_011175	XLOC_011175	ENSBTAT00000050813	NEK2	chr16:73674408-73686944	ENSBTAG00000009618	NEK2	Bos taurus NIMA (never in mitosis gene a)-related kinase 2 (NEK2), mRNA. [Source:RefSeq mRNA;Acc:NM_001046270]	GO:0004713(protein tyrosine kinase activity);GO:0016772(transferase activity, transferring phosphorus-containing groups);GO:0006468(protein phosphorylation);GO:0004674(protein serine/threonine kinase activity);GO:0004672(protein kinase activity);GO:0016310(phosphorylation);GO:0016301(kinase activity);GO:0005524(ATP binding);GO:0000070(mitotic sister chromatid segregation);GO:0000794(condensed nuc…	NA	OK	13.8421	30.671	-1.14782	down	0.0176	yes
XLOC_018465	XLOC_018465	ENSBTAT00000047200	CCDC152	chr20:31792401-31834092	ENSBTAG00000033221	CCDC152	coiled-coil domain containing 152 [Source:HGNC Symbol;Acc:HGNC:34438]	NA	NA	OK	37.974	84.0758	-1.14668	down	0.0499	yes
XLOC_014049	XLOC_014049	-	-	chr18:23256077-23302164	ENSBTAG00000040118	-	Uncharacterized protein [Source:UniProtKB/TrEMBL;Acc:E1BMY6]	GO:0045095(keratin filament);GO:0005882(intermediate filament)	NA	OK	8.5901	18.9807	-1.14378	down	0.0405	yes
XLOC_003422	XLOC_003422	ENSBTAT00000046291	SCG5	chr10:30077157-30135194	ENSBTAG00000032613	SCG5	Bos taurus secretogranin V (7B2 protein) (SCG5), mRNA. [Source:RefSeq mRNA;Acc:NM_001045998]	GO:0030141(secretory granule);GO:0007218(neuropeptide signaling pathway);GO:0046883(regulation of hormone secretion);GO:0016486(peptide hormone processing);GO:0043086(negative regulation of catalytic activity);GO:0004857(enzyme inhibitor activity);GO:0006886(intracellular protein transport);GO:0005515(protein binding);GO:0051082(unfolded protein binding)	NA	OK	10.4743	23.082	-1.13992	down	0.0372	yes
XLOC_003562	XLOC_003562	ENSBTAT00000006943	CCNB2	chr10:51247754-51272733	ENSBTAG00000005269	CCNB2	Bos taurus cyclin B2 (CCNB2), mRNA. [Source:RefSeq mRNA;Acc:NM_174264]	GO:0019901(protein kinase binding);GO:0000079(regulation of cyclin-dependent protein serine/threonine kinase activity);GO:0015630(microtubule cytoskeleton);GO:0051726(regulation of cell cycle);GO:0051301(cell division);GO:0007067(mitotic nuclear division);GO:0007049(cell cycle);GO:0005634(nucleus);GO:0048538(thymus development);GO:0040007(growth);GO:0043029(T cell homeostasis);GO:0001701(in utero…	04110(Cell cycle);04114(Oocyte meiosis);04115(p53 signaling pathway);04914(Progesterone-mediated oocyte maturation)	OK	29.8117	65.6941	-1.13988	down	0.014	yes
XLOC_022198	XLOC_022198	ENSBTAT00000045224	H2B	chr23:30737492-30741740	ENSBTAG00000032451	H2B	Histone H2B [Source:UniProtKB/TrEMBL;Acc:A6QQ28]	GO:0006334(nucleosome assembly);GO:0000786(nucleosome);GO:0046982(protein heterodimerization activity);GO:0005694(chromosome);GO:0003677(DNA binding);GO:0005634(nucleus)	NA	OK	22.0985	48.4008	-1.13108	down	0.0235	yes
XLOC_025971	XLOC_025971	ENSBTAT00000046599	GHITM	chr28:39435121-39449089	ENSBTAG00000032829	GHITM	Bos taurus growth hormone inducible transmembrane protein (GHITM), mRNA. [Source:RefSeq mRNA;Acc:NM_001034052]	GO:0016021(integral component of membrane);GO:0005739(mitochondrion);GO:0016020(membrane);GO:0070062(extracellular vesicular exosome);GO:0005515(protein binding)	NA	OK	50.8886	110.76	-1.12202	down	0.01265	yes
XLOC_003373	XLOC_003373	-	-	chr10:26655938-26657136	ENSBTAG00000040118	-	Uncharacterized protein [Source:UniProtKB/TrEMBL;Acc:E1BMY6]	GO:0045095(keratin filament);GO:0005882(intermediate filament)	NA	OK	8.44777	18.3666	-1.12044	down	0.04245	yes
XLOC_036049	XLOC_036049	ENSBTAT00000010823	SLC23A1	chr7:52271991-52284986	ENSBTAG00000010798	SLC23A1	solute carrier family 23 (ascorbic acid transporter), member 1 [Source:HGNC Symbol;Acc:HGNC:10974]	GO:0007420(brain development);GO:0016324(apical plasma membrane);GO:0043229(intracellular organelle);GO:0006814(sodium ion transport);GO:0005215(transporter activity);GO:0055085(transmembrane transport);GO:0006810(transport);GO:0005886(plasma membrane);GO:0005737(cytoplasm);GO:0015882(L-ascorbic acid transport);GO:0015229(L-ascorbic acid transporter activity);GO:0030324(lung development);GO:00099…	NA	OK	7.71522	16.7587	-1.11913	down	0.0269	yes
XLOC_012213	XLOC_012213	ENSBTAT00000002459	MED13L	chr17:60900471-61150532	ENSBTAG00000001888	MED13L	Bos taurus mediator complex subunit 13-like (MED13L), mRNA. [Source:RefSeq mRNA;Acc:NM_001192468]	GO:0016592(mediator complex);GO:0001104(RNA polymerase II transcription cofactor activity);GO:0006366(transcription from RNA polymerase II promoter);GO:0006357(regulation of transcription from RNA polymerase II promoter)	NA	OK	27.9951	60.7136	-1.11685	down	0.0132	yes
XLOC_002339	XLOC_002339	ENSBTAT00000003561	TMEM55B	chr10:26702989-26706505	ENSBTAG00000002748	TMEM55B	Bos taurus transmembrane protein 55B (TMEM55B), mRNA. [Source:RefSeq mRNA;Acc:NM_001076359]	GO:0016021(integral component of membrane)	NA	OK	9.71582	21.0616	-1.11621	down	0.0308	yes
XLOC_027939	XLOC_027939	ENSBTAT00000017157	ODF2L	chr3:57817500-57857339	ENSBTAG00000012907	ODF2L	Bos taurus outer dense fiber of sperm tails 2-like (ODF2L), mRNA. [Source:RefSeq mRNA;Acc:NM_001075993]	GO:0005813(centrosome)	NA	OK	5.56641	12.0623	-1.11569	down	0.0251	yes
XLOC_017614	XLOC_017614	ENSBTAT00000014216	BBS5	chr2:26800543-26821659	ENSBTAG00000010736	BBS5	Bos taurus Bardet-Biedl syndrome 5 (BBS5), mRNA. [Source:RefSeq mRNA;Acc:NM_001101132]	GO:0001103(RNA polymerase II repressing transcription factor binding);GO:0032266(phosphatidylinositol-3-phosphate binding);GO:0005515(protein binding);GO:0042384(cilium assembly);GO:0005622(intracellular);GO:0036064(ciliary basal body);GO:0034464(BBSome)	NA	OK	5.47153	11.7901	-1.10755	down	0.04075	yes
XLOC_026570	XLOC_026570	ENSBTAT00000018089	VEGFB	chr29:43154907-43158194	ENSBTAG00000047567	VEGFB	Vascular endothelial growth factor B [Source:UniProtKB/Swiss-Prot;Acc:Q9XS49]	GO:0008201(heparin binding);GO:0051781(positive regulation of cell division);GO:0008083(growth factor activity);GO:0060976(coronary vasculature development);GO:0006493(protein O-linked glycosylation);GO:0060048(cardiac muscle contraction);GO:0007507(heart development);GO:0046982(protein heterodimerization activity);GO:0042803(protein homodimerization activity);GO:0005576(extracellular region);GO:…	NA	OK	12.5535	27.0199	-1.10593	down	0.04145	yes
XLOC_024470	XLOC_024470	ENSBTAT00000006763	CEP55	chr26:14868769-14890080	ENSBTAG00000005129	CEP55	Bos taurus centrosomal protein 55kDa (CEP55), mRNA. [Source:RefSeq mRNA;Acc:NM_001205761]	GO:0045171(intercellular bridge);GO:0030496(midbody);GO:0005515(protein binding);GO:0045184(establishment of protein localization);GO:0000920(cytokinetic cell separation);GO:0000281(mitotic cytokinesis);GO:0005813(centrosome);GO:0016020(membrane)	NA	OK	10.4864	22.5507	-1.10465	down	0.0239	yes
XLOC_031129	XLOC_031129	ENSBTAT00000014749	SLC38A2	chr5:34028552-34042996	ENSBTAG00000011105	SLC38A2	Bos taurus solute carrier family 38, member 2 (SLC38A2), mRNA. [Source:RefSeq mRNA;Acc:NM_001082424]	GO:0006814(sodium ion transport);GO:0006865(amino acid transport);GO:0006811(ion transport);GO:0015293(symporter activity);GO:0006810(transport);GO:0005886(plasma membrane);GO:0016021(integral component of membrane);GO:0015171(amino acid transmembrane transporter activity);GO:0003333(amino acid transmembrane transport);GO:0016020(membrane)	NA	OK	93.4846	200.684	-1.10213	down	0.01865	yes
XLOC_003217	XLOC_003217	ENSBTAT00000005109	LARP6	chr10:17662472-17683274	ENSBTAG00000003915	LARP6	la-related protein 6 [Source:RefSeq peptide;Acc:NP_001092675]	GO:0006396(RNA processing);GO:0030529(ribonucleoprotein complex);GO:0003723(RNA binding);GO:0005634(nucleus);GO:0000166(nucleotide binding)	NA	OK	47.6078	102.139	-1.10126	down	0.0178	yes
XLOC_010176	XLOC_010176	ENSBTAT00000002578	HSPC321	chr15:43509669-43585976	ENSBTAG00000001987	HSPC321	Bos taurus SWAP switching B-cell complex 70kDa subunit (SWAP70), mRNA. [Source:RefSeq mRNA;Acc:NM_001080297]	GO:0016444(somatic cell DNA recombination);GO:0045190(isotype switching);GO:0003677(DNA binding);GO:0005515(protein binding);GO:0005524(ATP binding);GO:0005634(nucleus)	NA	OK	35.8245	76.7922	-1.10001	down	0.0158	yes
XLOC_002645	XLOC_002645	ENSBTAT00000043712	CDKN3	chr10:67155085-67171891	ENSBTAG00000019496	CDKN3	Bos taurus cyclin-dependent kinase inhibitor 3 (CDKN3), mRNA. [Source:RefSeq mRNA;Acc:NM_001040582]	GO:0004721(phosphoprotein phosphatase activity);GO:0016310(phosphorylation);GO:0016301(kinase activity);GO:0016791(phosphatase activity);GO:0016311(dephosphorylation);GO:0005515(protein binding);GO:0008138(protein tyrosine/serine/threonine phosphatase activity);GO:0006470(protein dephosphorylation);GO:0004725(protein tyrosine phosphatase activity);GO:0004722(protein serine/threonine phosphatase a…	NA	OK	10.4464	22.3877	-1.09969	down	0.04705	yes
XLOC_018324	XLOC_018324	ENSBTAT00000013179;ENSBTAT00000013177	CPEB4	chr20:5512160-5585032	ENSBTAG00000009995	CPEB4	CPEB4 protein; Uncharacterized protein [Source:UniProtKB/TrEMBL;Acc:A7Z087]	GO:0003676(nucleic acid binding);GO:0000166(nucleotide binding);GO:0002931(response to ischemia);GO:0014069(postsynaptic density);GO:0045202(synapse);GO:0030425(dendrite);GO:0005783(endoplasmic reticulum);GO:0003723(RNA binding);GO:0005515(protein binding);GO:0044822(poly(A) RNA binding)	NA	OK	7.61518	16.3175	-1.09947	down	0.03615	yes
XLOC_038754	XLOC_038754	ENSBTAT00000016650	IFNGR1	chr9:76092203-76116625	ENSBTAG00000012544	IFNGR1	Bos taurus interferon gamma receptor 1 (IFNGR1), mRNA. [Source:RefSeq mRNA;Acc:NM_001035063]	GO:0005515(protein binding);GO:0016020(membrane);GO:0019955(cytokine binding)	04060(Cytokine-cytokine receptor interaction);04630(Jak-STAT signaling pathway);04650(Natural killer cell mediated cytotoxicity);05140(Leishmaniasis);05142(Chagas disease)	OK	11.4968	24.5904	-1.09686	down	0.0193	yes
XLOC_028324	XLOC_028324	ENSBTAT00000027473	DGKH	chr3:113703379-113783354	ENSBTAG00000020616	DGKH	Bos taurus diacylglycerol kinase, delta 130kDa (DGKD), mRNA. [Source:RefSeq mRNA;Acc:NM_001035282]	GO:0005515(protein binding);GO:0035556(intracellular signal transduction);GO:0016310(phosphorylation);GO:0016301(kinase activity);GO:0007205(protein kinase C-activating G-protein coupled receptor signaling pathway);GO:0004143(diacylglycerol kinase activity);GO:0003951(NAD+ kinase activity);GO:0016740(transferase activity);GO:0008152(metabolic process);GO:0005524(ATP binding);GO:0000166(nucleotide…	00561(Glycerolipid metabolism);00564(Glycerophospholipid metabolism);04070(Phosphatidylinositol signaling system)	OK	38.3122	81.8534	-1.09524	down	0.0127	yes
XLOC_024464	XLOC_024464	ENSBTAT00000012347	KIF11	chr26:14012242-14088553	ENSBTAG00000009383	KIF11	Bos taurus kinesin family member 11 (KIF11), mRNA. [Source:RefSeq mRNA;Acc:NM_001192185]	GO:0008017(microtubule binding);GO:0007018(microtubule-based movement);GO:0005874(microtubule);GO:0005871(kinesin complex);GO:0003777(microtubule motor activity);GO:0008152(metabolic process);GO:0005524(ATP binding);GO:0000166(nucleotide binding);GO:0007100(mitotic centrosome separation);GO:0046602(regulation of mitotic centrosome separation);GO:0090307(spindle assembly involved in mitosis);GO:00…	NA	OK	19.2419	40.9973	-1.09128	down	0.0162	yes
XLOC_030345	XLOC_030345	ENSBTAT00000035138;ENSBTAT00000019578	DBF4	chr4:32427569-32454726	ENSBTAG00000014711	DBF4	Bos taurus DBF4 homolog (S. cerevisiae) (DBF4), mRNA. [Source:RefSeq mRNA;Acc:NM_001075476]	GO:0008270(zinc ion binding);GO:0003676(nucleic acid binding);GO:0005634(nucleus)	04110(Cell cycle);04110(Cell cycle)	OK	11.701	24.8908	-1.08898	down	0.02215	yes
XLOC_002420	XLOC_002420	ENSBTAT00000009521	BUB1B	chr10:35903020-35958915	ENSBTAG00000007237	BUB1B	BUB1 mitotic checkpoint serine/threonine kinase B [Source:HGNC Symbol;Acc:HGNC:1149]	GO:0016772(transferase activity, transferring phosphorus-containing groups);GO:0006468(protein phosphorylation);GO:0004672(protein kinase activity);GO:0005524(ATP binding);GO:0071459(protein localization to chromosome, centromeric region);GO:0000940(condensed chromosome outer kinetochore);GO:0000778(condensed nuclear chromosome kinetochore);GO:0007091(metaphase/anaphase transition of mitotic cell…	04110(Cell cycle)	OK	10.9904	23.353	-1.08737	down	0.02335	yes
XLOC_012857	XLOC_012857	ENSBTAT00000014109	PIK3IP1	chr17:72198072-72208795	ENSBTAG00000010667	PIK3IP1	Bos taurus phosphoinositide-3-kinase interacting protein 1 (PIK3IP1), mRNA. [Source:RefSeq mRNA;Acc:NM_001075552]	GO:0005886(plasma membrane);GO:0016021(integral component of membrane);GO:0043553(negative regulation of phosphatidylinositol 3-kinase activity);GO:0014067(negative regulation of phosphatidylinositol 3-kinase signaling);GO:0016020(membrane);GO:0036313(phosphatidylinositol 3-kinase catalytic subunit binding);GO:0070062(extracellular vesicular exosome)	NA	OK	6.35023	13.4889	-1.08689	down	0.0314	yes
XLOC_016526	XLOC_016526	ENSBTAT00000011212	SPHK1	chr19:55978710-55986449	ENSBTAG00000008507	SPHK1	sphingosine kinase 1 [Source:HGNC Symbol;Acc:HGNC:11240]	GO:0016310(phosphorylation);GO:0007205(protein kinase C-activating G-protein coupled receptor signaling pathway);GO:0004143(diacylglycerol kinase activity);GO:0003951(NAD+ kinase activity);GO:0008152(metabolic process);GO:0017050(D-erythro-sphingosine kinase activity);GO:0008481(sphinganine kinase activity);GO:0006670(sphingosine metabolic process);GO:0010803(regulation of tumor necrosis factor-m…	NA	OK	24.6976	52.4607	-1.08687	down	0.023	yes
XLOC_040023	XLOC_040023	ENSBTAT00000018226	PSMD10	chrX:60965545-60973526	ENSBTAG00000013721	PSMD10	Bos taurus proteasome (prosome, macropain) 26S subunit, non-ATPase, 10 (PSMD10), mRNA. [Source:RefSeq mRNA;Acc:NM_001046406]	GO:0005515(protein binding);GO:0000502(proteasome complex);GO:0045737(positive regulation of cyclin-dependent protein serine/threonine kinase activity);GO:0007253(cytoplasmic sequestering of NF-kappaB);GO:0090201(negative regulation of release of cytochrome c from mitochondria);GO:0043518(negative regulation of DNA damage response, signal transduction by p53 class mediator);GO:0043409(negative re…	NA	OK	17.2918	36.6757	-1.08473	down	0.03405	yes
XLOC_025859	XLOC_025859	ENSBTAT00000018630	SIRT1	chr28:24556239-24582756	ENSBTAG00000014023	SIRT1	sirtuin 1 [Source:HGNC Symbol;Acc:HGNC:14929]	GO:0070403(NAD+ binding);GO:0031393(negative regulation of prostaglandin biosynthetic process);GO:0000731(DNA synthesis involved in DNA repair);GO:0034979(NAD-dependent protein deacetylase activity);GO:2000481(positive regulation of cAMP-dependent protein kinase activity);GO:0070857(regulation of bile acid biosynthetic process);GO:0035356(cellular triglyceride homeostasis);GO:2000111(positive reg…	NA	OK	5.6456	11.9563	-1.08257	down	0.04745	yes
XLOC_002443	XLOC_002443	ENSBTAT00000014263	NUSAP1	chr10:36905770-36953202	ENSBTAG00000010774	NUSAP1	Bos taurus nucleolar and spindle associated protein 1 (NUSAP1), mRNA. [Source:RefSeq mRNA;Acc:NM_001046571]	GO:0000281(mitotic cytokinesis);GO:0005819(spindle);GO:0051301(cell division);GO:0007067(mitotic nuclear division);GO:0005730(nucleolus);GO:0000226(microtubule cytoskeleton organization);GO:0007049(cell cycle);GO:0005694(chromosome);GO:0003677(DNA binding);GO:0005874(microtubule);GO:0005856(cytoskeleton);GO:0005634(nucleus);GO:0005737(cytoplasm);GO:0005876(spindle microtubule);GO:0008017(microtub…	NA	OK	15.5653	32.9536	-1.0821	down	0.03655	yes
XLOC_023858	XLOC_023858	ENSBTAT00000021723	ROGDI	chr25:3894379-3900145	ENSBTAG00000016331	ROGDI	Bos taurus rogdi homolog (Drosophila) (ROGDI), mRNA. [Source:RefSeq mRNA;Acc:NM_001075452]	GO:0005635(nuclear envelope);GO:0005634(nucleus);GO:0030097(hemopoiesis);GO:0008284(positive regulation of cell proliferation);GO:0005622(intracellular)	NA	OK	19.9952	42.309	-1.08131	down	0.02125	yes
XLOC_033788	XLOC_033788	ENSBTAT00000023396	AGPAT9	chr6:100070485-100141604	ENSBTAG00000017592	AGPAT9	1-acylglycerol-3-phosphate O-acyltransferase 9 [Source:HGNC Symbol;Acc:HGNC:28157]	GO:0016746(transferase activity, transferring acyl groups);GO:0008152(metabolic process);GO:0004366(glycerol-3-phosphate O-acyltransferase activity);GO:0005783(endoplasmic reticulum);GO:0032006(regulation of TOR signaling);GO:0005789(endoplasmic reticulum membrane)	00561(Glycerolipid metabolism);00564(Glycerophospholipid metabolism)	OK	9.00375	19.0405	-1.08048	down	0.0238	yes
XLOC_031578	XLOC_031578	ENSBTAT00000007064	TMTC1	chr5:80191724-80499948	ENSBTAG00000005370	TMTC1	transmembrane and tetratricopeptide repeat containing 1 [Source:HGNC Symbol;Acc:HGNC:24099]	GO:0005515(protein binding);GO:0005739(mitochondrion)	NA	OK	12.36	26.1081	-1.07882	down	0.0214	yes
XLOC_035412	XLOC_035412	ENSBTAT00000020709	SQSTM1	chr7:1317087-1346051	ENSBTAG00000015591	SQSTM1	Bos taurus sequestosome 1 (SQSTM1), mRNA. [Source:RefSeq mRNA;Acc:NM_176641]	GO:0005515(protein binding);GO:0008270(zinc ion binding);GO:0016235(aggresome);GO:0070530(K63-linked polyubiquitin binding);GO:0000407(pre-autophagosomal structure);GO:0042802(identical protein binding);GO:0016234(inclusion body);GO:0005080(protein kinase C binding);GO:0005776(autophagic vacuole);GO:0043122(regulation of I-kappaB kinase/NF-kappaB signaling);GO:0016239(positive regulation of macro…	NA	OK	337.582	712.406	-1.07746	down	0.0429	yes
XLOC_032233	XLOC_032233	ENSBTAT00000011203	TROAP	chr5:30658594-30665357	ENSBTAG00000008499	TROAP	TROAP protein; Uncharacterized protein [Source:UniProtKB/TrEMBL;Acc:Q08DB3]	GO:0005515(protein binding)	NA	OK	21.1053	44.4485	-1.07453	down	0.02775	yes
XLOC_010752	XLOC_010752	ENSBTAT00000009955;ENSBTAT00000046995	CEP170	chr16:34655923-34787540	ENSBTAG00000007566	CEP170	centrosomal protein of 170 kDa [Source:RefSeq peptide;Acc:NP_001030454]	GO:0005515(protein binding);GO:0031965(nuclear membrane);GO:0005814(centriole);GO:0005813(centrosome);GO:0005737(cytoplasm)	NA	OK	13.468	28.3482	-1.07372	down	0.04785	yes
XLOC_007838	XLOC_007838	ENSBTAT00000022981	OPLAH	chr14:1956978-1968825	ENSBTAG00000017281	OPLAH	5-oxoprolinase (ATP-hydrolysing) [Source:HGNC Symbol;Acc:HGNC:8149]	GO:0016787(hydrolase activity);GO:0008152(metabolic process);GO:0003824(catalytic activity)	00480(Glutathione metabolism)	OK	11.9114	25.0661	-1.0734	down	0.02265	yes
XLOC_013993	XLOC_013993	ENSBTAT00000021306	ANKRD11	chr18:14371107-14436428	ENSBTAG00000016006	ANKRD11	ankyrin repeat domain 11 [Source:HGNC Symbol;Acc:HGNC:21316]	GO:0005515(protein binding);GO:0060323(head morphogenesis);GO:0048705(skeletal system morphogenesis);GO:0060348(bone development);GO:0001894(tissue homeostasis);GO:0001701(in utero embryonic development);GO:0035264(multicellular organism growth);GO:0060325(face morphogenesis);GO:0005654(nucleoplasm);GO:0042475(odontogenesis of dentin-containing tooth);GO:0005886(plasma membrane);GO:0005737(cytopl…	NA	OK	17.1652	36.0693	-1.07129	down	0.02125	yes
XLOC_021557	XLOC_021557	ENSBTAT00000013135	FLOT1	chr23:28090028-28100113	ENSBTAG00000009960	FLOT1	Bos taurus flotillin 1 (FLOT1), mRNA. [Source:RefSeq mRNA;Acc:NM_001076887]	GO:0005901(caveola);GO:0042470(melanosome);GO:0005768(endosome);GO:0005886(plasma membrane);GO:0035023(regulation of Rho protein signal transduction);GO:0016600(flotillin complex);GO:0042383(sarcolemma);GO:0045121(membrane raft);GO:0007409(axonogenesis);GO:0016020(membrane);GO:0072659(protein localization to plasma membrane);GO:0005515(protein binding);GO:0090002(establishment of protein localiza…	04910(Insulin signaling pathway)	OK	18.108	38.019	-1.07009	down	0.0273	yes
XLOC_004236	XLOC_004236	ENSBTAT00000009749	PAPOLG	chr11:43378848-43410650	ENSBTAG00000007414	PAPOLG	Bos taurus poly(A) polymerase gamma (PAPOLG), mRNA. [Source:RefSeq mRNA;Acc:NM_001098066]	GO:0043631(RNA polyadenylation);GO:0031123(RNA 3'-end processing);GO:0006378(mRNA polyadenylation);GO:0004652(polynucleotide adenylyltransferase activity);GO:0003723(RNA binding);GO:0016779(nucleotidyltransferase activity);GO:0005634(nucleus);GO:0005654(nucleoplasm);GO:0005737(cytoplasm);GO:0046872(metal ion binding);GO:0016020(membrane)	NA	OK	15.7246	32.9984	-1.06937	down	0.01905	yes
XLOC_037296	XLOC_037296	ENSBTAT00000061597	FZD3	chr8:10001621-10091189	ENSBTAG00000035084	FZD3	Bos taurus frizzled family receptor 3 (FZD3), mRNA. [Source:RefSeq mRNA;Acc:NM_001192964]	GO:0005515(protein binding);GO:0042813(Wnt-activated receptor activity);GO:0016055(Wnt signaling pathway);GO:0007166(cell surface receptor signaling pathway);GO:0004888(transmembrane signaling receptor activity);GO:0007275(multicellular organismal development);GO:0016021(integral component of membrane);GO:0016020(membrane)	04310(Wnt signaling pathway);04916(Melanogenesis);05200(Pathways in cancer);05217(Basal cell carcinoma)	OK	7.96364	16.7106	-1.06927	down	0.02315	yes
XLOC_012668	XLOC_012668	ENSBTAT00000009562	TCTN2	chr17:54245867-54274535	ENSBTAG00000007271	TCTN2	tectonic family member 2 [Source:HGNC Symbol;Acc:HGNC:25774]	NA	NA	OK	6.71793	14.0886	-1.06844	down	0.0298	yes
XLOC_003802	XLOC_003802	ENSBTAT00000014664;ENSBTAT00000064501	ZFYVE1	chr10:84869481-84914784	ENSBTAG00000011041	ZFYVE1	zinc finger, FYVE domain containing 1 [Source:HGNC Symbol;Acc:HGNC:13180]	GO:0046872(metal ion binding);GO:0097629(extrinsic component of omegasome membrane);GO:0005776(autophagic vacuole);GO:0044233(ER-mitochondrion membrane contact site);GO:0005795(Golgi stack);GO:0005545(1-phosphatidylinositol binding);GO:0043325(phosphatidylinositol-3,4-bisphosphate binding);GO:0005547(phosphatidylinositol-3,4,5-trisphosphate binding);GO:0010923(negative regulation of phosphatase a…	NA	OK	20.6109	43.1807	-1.06698	down	0.0205	yes
XLOC_010461	XLOC_010461	ENSBTAT00000005832;ENSBTAT00000060090	CKAP5	chr15:77547962-77653734	ENSBTAG00000004448	CKAP5	cytoskeleton associated protein 5 [Source:HGNC Symbol;Acc:HGNC:28959]	GO:0004519(endonuclease activity);GO:0005515(protein binding);GO:0030951(establishment or maintenance of microtubule cytoskeleton polarity);GO:0000930(gamma-tubulin complex);GO:0035371(microtubule plus-end);GO:0043234(protein complex);GO:0051297(centrosome organization);GO:0000922(spindle pole);GO:0007051(spindle organization);GO:0005813(centrosome);GO:0016020(membrane);GO:0005488(binding)	NA	OK	24.5953	51.507	-1.06639	down	0.02635	yes
XLOC_003824	XLOC_003824	ENSBTAT00000029274	LTBP2	chr10:86185972-86294276	ENSBTAG00000021957	LTBP2	latent transforming growth factor beta binding protein 2 [Source:HGNC Symbol;Acc:HGNC:6715]	GO:0005515(protein binding);GO:0005509(calcium ion binding);GO:0070062(extracellular vesicular exosome);GO:0031012(extracellular matrix);GO:0005615(extracellular space)	NA	OK	44.0603	92.1696	-1.06481	down	0.02215	yes
XLOC_027349	XLOC_027349	ENSBTAT00000011757	CREG1	chr3:1196981-1208368	ENSBTAG00000008931	CREG1	cellular repressor of E1A-stimulated genes 1 [Source:HGNC Symbol;Acc:HGNC:2351]	GO:0010181(FMN binding);GO:0055114(oxidation-reduction process);GO:0016491(oxidoreductase activity);GO:0008134(transcription factor binding);GO:0006355(regulation of transcription, DNA-templated);GO:0005667(transcription factor complex);GO:0070062(extracellular vesicular exosome)	NA	OK	14.5321	30.3717	-1.06348	down	0.0303	yes
XLOC_028897	XLOC_028897	ENSBTAT00000017232	SARS	chr3:34283444-34303242	ENSBTAG00000012962	SARS	Bos taurus seryl-tRNA synthetase (SARS), mRNA. [Source:RefSeq mRNA;Acc:NM_174175]	GO:0006418(tRNA aminoacylation for protein translation);GO:0006412(translation);GO:0004812(aminoacyl-tRNA ligase activity);GO:0016874(ligase activity);GO:0005737(cytoplasm);GO:0005524(ATP binding);GO:0000166(nucleotide binding);GO:0006434(seryl-tRNA aminoacylation);GO:0004828(serine-tRNA ligase activity);GO:0097056(selenocysteinyl-tRNA(Sec) biosynthetic process);GO:0070062(extracellular vesicular…	00970(Aminoacyl-tRNA biosynthesis)	OK	126.297	263.943	-1.06341	down	0.0233	yes
XLOC_033154	XLOC_033154	ENSBTAT00000012508	NAGA	chr5:113552463-113562115	ENSBTAG00000009506	NAGA	alpha-N-acetylgalactosaminidase precursor [Source:RefSeq peptide;Acc:NP_001039814]	GO:0004553(hydrolase activity, hydrolyzing O-glycosyl compounds);GO:0016798(hydrolase activity, acting on glycosyl bonds);GO:0005975(carbohydrate metabolic process);GO:0016787(hydrolase activity);GO:0008152(metabolic process);GO:0003824(catalytic activity);GO:0005737(cytoplasm);GO:0019377(glycolipid catabolic process);GO:0008456(alpha-N-acetylgalactosaminidase activity);GO:0016052(carbohydrate ca…	00603(Glycosphingolipid biosynthesis - globo series);04142(Lysosome)	OK	169.202	353.08	-1.06125	down	0.0194	yes
XLOC_015244	XLOC_015244	ENSBTAT00000054338	GRN	chr19:44775107-44782140	ENSBTAG00000018823	GRN	Bos taurus granulin (GRN), mRNA. [Source:RefSeq mRNA;Acc:NM_001077014]	GO:0001835(blastocyst hatching);GO:0050679(positive regulation of epithelial cell proliferation);GO:0007566(embryo implantation);GO:0005615(extracellular space);GO:0005739(mitochondrion);GO:0043231(intracellular membrane-bounded organelle);GO:0070062(extracellular vesicular exosome);GO:0005515(protein binding);GO:0044822(poly(A) RNA binding)	NA	OK	137.607	287.067	-1.06083	down	0.02095	yes
XLOC_007115	XLOC_007115	ENSBTAT00000009850	NCOA3	chr13:76820060-76878068	ENSBTAG00000007489	NCOA3	nuclear receptor coactivator 3 [Source:HGNC Symbol;Acc:HGNC:7670]	GO:0003713(transcription coactivator activity);GO:0030374(ligand-dependent nuclear receptor transcription coactivator activity);GO:0046983(protein dimerization activity);GO:0007165(signal transduction);GO:0004871(signal transducer activity);GO:0006351(transcription, DNA-templated);GO:0006355(regulation of transcription, DNA-templated);GO:0005634(nucleus);GO:0004402(histone acetyltransferase activ…	NA	OK	9.15304	19.0343	-1.05628	down	0.02355	yes
XLOC_040142	XLOC_040142	ENSBTAT00000017093	ENSBTAG00000012861	chrX:85321207-85449908	ENSBTAG00000012861	-	Bos taurus kinesin family member 4A (KIF4A), mRNA. [Source:RefSeq mRNA;Acc:NM_001206105]	GO:0008017(microtubule binding);GO:0007018(microtubule-based movement);GO:0005874(microtubule);GO:0005871(kinesin complex);GO:0003777(microtubule motor activity);GO:0008152(metabolic process);GO:0005524(ATP binding);GO:0000166(nucleotide binding)	NA	OK	10.2375	21.2895	-1.05627	down	0.0226	yes
XLOC_031892	XLOC_031892	ENSBTAT00000008431	ACO2	chr5:113089138-113150601	ENSBTAG00000006429	ACO2	Bos taurus aconitase 2, mitochondrial (ACO2), mRNA. [Source:RefSeq mRNA;Acc:NM_173977]	GO:0006099(tricarboxylic acid cycle);GO:0051539(4 iron, 4 sulfur cluster binding);GO:0051536(iron-sulfur cluster binding);GO:0005506(iron ion binding);GO:0005739(mitochondrion);GO:0016829(lyase activity);GO:0046872(metal ion binding);GO:0008152(metabolic process);GO:0003994(aconitate hydratase activity);GO:0006101(citrate metabolic process);GO:0005634(nucleus)	00020(Citrate cycle (TCA cycle));00630(Glyoxylate and dicarboxylate metabolism)	OK	661.184	1374.6	-1.05589	down	0.03345	yes
XLOC_029086	XLOC_029086	ENSBTAT00000039125	NEXN	chr3:66998549-67054658	ENSBTAG00000008921	NEXN	nexilin (F actin binding protein) [Source:HGNC Symbol;Acc:HGNC:29557]	GO:0030018(Z disc);GO:0005515(protein binding);GO:0030334(regulation of cell migration);GO:0004683(calmodulin-dependent protein kinase activity);GO:0051015(actin filament binding);GO:0006468(protein phosphorylation);GO:0008307(structural constituent of muscle);GO:0051493(regulation of cytoskeleton organization);GO:0005925(focal adhesion);GO:0048739(cardiac muscle fiber development)	NA	OK	22.5401	46.8233	-1.05473	down	0.02085	yes
XLOC_003055	XLOC_003055	ENSBTAT00000042964	TTC8	chr10:101571087-101630217	ENSBTAG00000030432	TTC8	tetratricopeptide repeat domain 8 [Source:HGNC Symbol;Acc:HGNC:20087]	GO:0005515(protein binding);GO:0061326(renal tubule development);GO:0060219(camera-type eye photoreceptor cell differentiation);GO:0034464(BBSome);GO:0032391(photoreceptor connecting cilium);GO:0021772(olfactory bulb development);GO:0032880(regulation of protein localization);GO:0045444(fat cell differentiation);GO:0042384(cilium assembly);GO:0035264(multicellular organism growth);GO:0007411(axon…	NA	OK	13.0204	26.9893	-1.05161	down	0.03055	yes
XLOC_033607	XLOC_033607	ENSBTAT00000027515	RASL11B	chr6:70179361-70183823	ENSBTAG00000020647	RASL11B	Bos taurus RAS-like, family 11, member B (RASL11B), mRNA. [Source:RefSeq mRNA;Acc:NM_001015635]	GO:0006184(GTP catabolic process);GO:0007264(small GTPase mediated signal transduction);GO:0005525(GTP binding);GO:0007165(signal transduction);GO:0005622(intracellular);GO:0015031(protein transport);GO:0016021(integral component of membrane);GO:0000166(nucleotide binding);GO:0016020(membrane);GO:0015684(ferrous iron transport);GO:0015093(ferrous iron transmembrane transporter activity)	NA	OK	14.6294	30.2631	-1.04869	down	0.03475	yes
XLOC_014651	XLOC_014651	ENSBTAT00000010381	SCPEP1	chr19:8018815-8052589	ENSBTAG00000007893	SCPEP1	Bos taurus serine carboxypeptidase 1 (SCPEP1), mRNA. [Source:RefSeq mRNA;Acc:NM_001045909]	GO:0004185(serine-type carboxypeptidase activity);GO:0006508(proteolysis);GO:0004180(carboxypeptidase activity);GO:0045909(positive regulation of vasodilation);GO:0045776(negative regulation of blood pressure);GO:0070062(extracellular vesicular exosome)	NA	OK	23.0783	47.6748	-1.04669	down	0.0283	yes
XLOC_030523	XLOC_030523	ENSBTAT00000027880	CHN2	chr4:67063880-67401525	ENSBTAG00000020931	CHN2	CHN2 protein; Uncharacterized protein [Source:UniProtKB/TrEMBL;Acc:Q0VD41]	GO:0007165(signal transduction);GO:0005622(intracellular);GO:0035556(intracellular signal transduction);GO:0046872(metal ion binding);GO:0005515(protein binding)	NA	OK	21.0042	43.249	-1.04199	down	0.0272	yes
XLOC_009536	XLOC_009536	ENSBTAT00000044657	ARL14EP	chr15:61833888-61847775	ENSBTAG00000012417	ARL14EP	Bos taurus chromosome 15 open reading frame, human C11orf46 (ARL14EP), mRNA. [Source:RefSeq mRNA;Acc:NM_001031761]	GO:0005737(cytoplasm);GO:0005515(protein binding)	NA	OK	19.6447	40.3802	-1.03951	down	0.03045	yes
XLOC_025152	XLOC_025152	ENSBTAT00000063103;ENSBTAT00000003173	MKI67	chr26:47851103-47880010	ENSBTAG00000002444	MKI67	marker of proliferation Ki-67 [Source:HGNC Symbol;Acc:HGNC:7107]	GO:0005515(protein binding);GO:0007126(meiotic nuclear division);GO:0000775(chromosome, centromeric region);GO:0008283(cell proliferation);GO:0005730(nucleolus);GO:0000793(condensed chromosome);GO:0005737(cytoplasm);GO:0005634(nucleus);GO:0044822(poly(A) RNA binding);GO:0008022(protein C-terminus binding);GO:0016020(membrane)	NA	OK	24.3542	50.0557	-1.03936	down	0.0216	yes
XLOC_032171	XLOC_032171	ENSBTAT00000011761	ESPL1	chr5:26891699-26913490	ENSBTAG00000008934	ESPL1	Bos taurus extra spindle pole bodies homolog 1 (S. cerevisiae) (ESPL1), mRNA. [Source:RefSeq mRNA;Acc:NM_001045949]	GO:0008233(peptidase activity);GO:0006508(proteolysis);GO:0005634(nucleus);GO:0000212(meiotic spindle organization);GO:0007127(meiosis I);GO:0000070(mitotic sister chromatid segregation);GO:0008234(cysteine-type peptidase activity);GO:0045143(homologous chromosome segregation);GO:0007067(mitotic nuclear division);GO:0007059(chromosome segregation);GO:0005515(protein binding);GO:0005813(centrosome)	04110(Cell cycle);04114(Oocyte meiosis)	OK	11.0043	22.5114	-1.03259	down	0.02365	yes
XLOC_012580	XLOC_012580	-	-	chr17:36134552-36223696	ENSBTAG00000040118	-	Uncharacterized protein [Source:UniProtKB/TrEMBL;Acc:E1BMY6]	GO:0045095(keratin filament);GO:0005882(intermediate filament)	NA	OK	7.80481	15.9533	-1.03142	down	0.0233	yes
XLOC_028016	XLOC_028016	ENSBTAT00000040383	DEPDC1	chr3:77093091-77113987	ENSBTAG00000001343	DEPDC1	DEP domain containing 1 [Source:HGNC Symbol;Acc:HGNC:22949]	GO:0007165(signal transduction);GO:0005622(intracellular);GO:0035556(intracellular signal transduction);GO:0017053(transcriptional repressor complex);GO:0005654(nucleoplasm);GO:0005515(protein binding);GO:0045892(negative regulation of transcription, DNA-templated);GO:0005634(nucleus)	NA	OK	6.66177	13.5918	-1.02876	down	0.03475	yes
XLOC_030493	XLOC_030493	ENSBTAT00000033703	FKBP9	chr4:64209774-64252100	ENSBTAG00000016707	FKBP9	Bos taurus FK506 binding protein 9, 63 kDa (FKBP9), mRNA. [Source:RefSeq mRNA;Acc:NM_001046372]	GO:0061077(chaperone-mediated protein folding);GO:0005528(FK506 binding);GO:0003755(peptidyl-prolyl cis-trans isomerase activity);GO:0000413(protein peptidyl-prolyl isomerization);GO:0006457(protein folding);GO:0005789(endoplasmic reticulum membrane);GO:0005783(endoplasmic reticulum);GO:0016853(isomerase activity);GO:0046872(metal ion binding);GO:0005509(calcium ion binding)	NA	OK	40.8249	83.2662	-1.02828	down	0.03175	yes
XLOC_004227	XLOC_004227	ENSBTAT00000009208	SPTBN1	chr11:37030008-37241384	ENSBTAG00000006995	SPTBN1	spectrin, beta, non-erythrocytic 1 [Source:HGNC Symbol;Acc:HGNC:11275]	GO:0005543(phospholipid binding);GO:0005515(protein binding);GO:0003779(actin binding);GO:0007184(SMAD protein import into nucleus);GO:0007182(common-partner SMAD protein phosphorylation);GO:0072661(protein targeting to plasma membrane);GO:0032437(cuticular plate);GO:0030673(axolemma);GO:0031430(M band);GO:0030863(cortical cytoskeleton);GO:0016020(membrane);GO:0005886(plasma membrane);GO:0005634(…	NA	OK	107.315	218.809	-1.02782	down	0.0354	yes
XLOC_005119	XLOC_005119	ENSBTAT00000055279	KCMF1	chr11:49778940-49811675	ENSBTAG00000020630	KCMF1	Bos taurus potassium channel modulatory factor 1 (KCMF1), mRNA. [Source:RefSeq mRNA;Acc:NM_001076275]	GO:0046872(metal ion binding);GO:0008270(zinc ion binding)	NA	OK	33.8885	69.0714	-1.02729	down	0.0341	yes
XLOC_009147	XLOC_009147	ENSBTAT00000007042	VPS11	chr15:30181556-30191821	ENSBTAG00000005357	VPS11	Bos taurus vacuolar protein sorting 11 homolog (S. cerevisiae) (VPS11), mRNA. [Source:RefSeq mRNA;Acc:NM_001076216]	GO:0005515(protein binding);GO:0006886(intracellular protein transport);GO:0016192(vesicle-mediated transport);GO:0046872(metal ion binding);GO:0008270(zinc ion binding);GO:0005884(actin filament);GO:0005769(early endosome);GO:0005488(binding)	NA	OK	12.4365	25.3225	-1.02584	down	0.03365	yes
XLOC_038356	XLOC_038356	ENSBTAT00000066150;ENSBTAT00000008296	SNX9	chr9:95889261-95954387	ENSBTAG00000006323	SNX9	Bos taurus sorting nexin 9 (SNX9), mRNA. [Source:RefSeq mRNA;Acc:NM_001199026]	GO:0005515(protein binding);GO:0000281(mitotic cytokinesis);GO:0016023(cytoplasmic membrane-bounded vesicle);GO:0007067(mitotic nuclear division);GO:0035091(phosphatidylinositol binding);GO:0006897(endocytosis);GO:0005768(endosome);GO:0015031(protein transport);GO:0006886(intracellular protein transport);GO:0005886(plasma membrane);GO:0005737(cytoplasm);GO:0036089(cleavage furrow formation);GO:00…	NA	OK	61.3938	125.007	-1.02584	down	0.0256	yes
XLOC_020283	XLOC_020283	ENSBTAT00000006139	WARS	chr21:66888147-66917638	ENSBTAG00000004679	WARS	Bos taurus tryptophanyl-tRNA synthetase (WARS), mRNA. [Source:RefSeq mRNA;Acc:NM_174218]	GO:0006418(tRNA aminoacylation for protein translation);GO:0006412(translation);GO:0004812(aminoacyl-tRNA ligase activity);GO:0016874(ligase activity);GO:0005737(cytoplasm);GO:0005524(ATP binding);GO:0000166(nucleotide binding);GO:0045765(regulation of angiogenesis);GO:0070062(extracellular vesicular exosome);GO:0005515(protein binding);GO:0005634(nucleus);GO:0006436(tryptophanyl-tRNA aminoacylat…	00380(Tryptophan metabolism);00970(Aminoacyl-tRNA biosynthesis)	OK	193.726	394.354	-1.02547	down	0.02635	yes
XLOC_031059	XLOC_031059	ENSBTAT00000016988	RACGAP1	chr5:30034668-30060930	ENSBTAG00000012784	RACGAP1	Rac GTPase activating protein 1 [Source:HGNC Symbol;Acc:HGNC:9804]	GO:0038032(termination of G-protein coupled receptor signaling pathway);GO:0007165(signal transduction);GO:0005622(intracellular);GO:0035556(intracellular signal transduction);GO:0046872(metal ion binding);GO:0009790(embryo development);GO:0007405(neuroblast proliferation);GO:0007108(cytokinesis, initiation of separation);GO:0000915(actomyosin contractile ring assembly);GO:0097149(centralspindlin…	NA	OK	43.0503	87.5127	-1.02347	down	0.02845	yes
XLOC_009828	XLOC_009828	ENSBTAT00000017032	STX3	chr15:84312681-84344566	ENSBTAG00000012820	STX3	Bos taurus syntaxin 3 (STX3), mRNA. [Source:RefSeq mRNA;Acc:NM_001101971]	GO:0005515(protein binding);GO:0005484(SNAP receptor activity);GO:0006886(intracellular protein transport);GO:0016192(vesicle-mediated transport);GO:0060291(long-term synaptic potentiation);GO:0030141(secretory granule);GO:0016324(apical plasma membrane);GO:0006887(exocytosis);GO:0030425(dendrite);GO:0016020(membrane);GO:1903078(positive regulation of protein localization to plasma membrane);GO:2…	04130(SNARE interactions in vesicular transport)	OK	12.2573	24.906	-1.02285	down	0.0302	yes
XLOC_022035	XLOC_022035	ENSBTAT00000018963	MUT	chr23:21938480-21980147	ENSBTAG00000014272	MUT	Bos taurus methylmalonyl CoA mutase (MUT), mRNA. [Source:RefSeq mRNA;Acc:NM_173939]	GO:0016866(intramolecular transferase activity);GO:0016853(isomerase activity);GO:0046872(metal ion binding);GO:0008152(metabolic process);GO:0003824(catalytic activity);GO:0004494(methylmalonyl-CoA mutase activity);GO:0009791(post-embryonic development);GO:0005739(mitochondrion);GO:0072341(modified amino acid binding);GO:0050667(homocysteine metabolic process);GO:0031419(cobalamin binding)	00280(Valine, leucine and isoleucine degradation);00630(Glyoxylate and dicarboxylate metabolism);00640(Propanoate metabolism)	OK	14.5346	29.4952	-1.02099	down	0.02735	yes
XLOC_034428	XLOC_034428	ENSBTAT00000021189	ABLIM2	chr6:119106180-119213224	ENSBTAG00000015926	ABLIM2	actin binding LIM protein family, member 2 [Source:HGNC Symbol;Acc:HGNC:19195]	GO:0007010(cytoskeleton organization);GO:0030036(actin cytoskeleton organization);GO:0003779(actin binding);GO:0006351(transcription, DNA-templated);GO:0046872(metal ion binding);GO:0008270(zinc ion binding);GO:0030016(myofibril);GO:0045944(positive regulation of transcription from RNA polymerase II promoter);GO:0015629(actin cytoskeleton)	04360(Axon guidance)	OK	12.1048	24.5434	-1.01976	down	0.03795	yes
XLOC_032384	XLOC_032384	ENSBTAT00000038585	XPOT	chr5:49550708-49591147	ENSBTAG00000026962	XPOT	exportin, tRNA [Source:HGNC Symbol;Acc:HGNC:12826]	GO:0008536(Ran GTPase binding);GO:0006886(intracellular protein transport);GO:0006810(transport);GO:0005634(nucleus);GO:0006409(tRNA export from nucleus);GO:0005643(nuclear pore);GO:0000049(tRNA binding);GO:0005654(nucleoplasm);GO:0005737(cytoplasm);GO:0005488(binding)	NA	OK	68.8625	139.597	-1.01948	down	0.0236	yes
XLOC_019887	XLOC_019887	ENSBTAT00000014074	MEF2A	chr21:7045095-7225412	ENSBTAG00000010649	MEF2A	Bos taurus myocyte enhancer factor 2A (MEF2A), mRNA. [Source:RefSeq mRNA;Acc:NM_001083638]	GO:0071277(cellular response to calcium ion);GO:0070375(ERK5 cascade);GO:0061337(cardiac conduction);GO:0055005(ventricular cardiac myofibril assembly);GO:0048813(dendrite morphogenesis);GO:0048311(mitochondrion distribution);GO:0046332(SMAD binding);GO:0035035(histone acetyltransferase binding);GO:0033613(activating transcription factor binding);GO:0000977(RNA polymerase II regulatory region seq…	NA	OK	6.37453	12.901	-1.01709	down	0.0276	yes
XLOC_030975	XLOC_030975	ENSBTAT00000018261	ITGA5	chr5:25778011-25799053	ENSBTAG00000013745	ITGA5	Bos taurus integrin, alpha 5 (fibronectin receptor, alpha polypeptide) (ITGA5), mRNA. [Source:RefSeq mRNA;Acc:NM_001166500]	GO:0008305(integrin complex);GO:0007229(integrin-mediated signaling pathway);GO:0007155(cell adhesion);GO:0016021(integral component of membrane);GO:0007044(cell-substrate junction assembly);GO:0007613(memory);GO:0033631(cell-cell adhesion mediated by integrin);GO:0007159(leukocyte cell-cell adhesion);GO:0007157(heterophilic cell-cell adhesion via plasma membrane cell adhesion molecules);GO:00051…	04145(Phagosome);04510(Focal adhesion);04512(ECM-receptor interaction);04640(Hematopoietic cell lineage);04810(Regulation of actin cytoskeleton);05100(Bacterial invasion of epithelial cells);05410(Hypertrophic cardiomyopathy (HCM));05412(Arrhythmogenic right ventricular cardiomyopathy (ARVC));05414(Dilated cardiomyopathy)	OK	61.9421	125.297	-1.01636	down	0.0242	yes
XLOC_029262	XLOC_029262	ENSBTAT00000020322	KIF2C	chr3:101832372-101851110	ENSBTAG00000015280	KIF2C	Bos taurus kinesin family member 2C (KIF2C), mRNA. [Source:RefSeq mRNA;Acc:NM_001101147]	GO:0008017(microtubule binding);GO:0007018(microtubule-based movement);GO:0005874(microtubule);GO:0005871(kinesin complex);GO:0003777(microtubule motor activity);GO:0008152(metabolic process);GO:0005524(ATP binding);GO:0000166(nucleotide binding);GO:0000775(chromosome, centromeric region);GO:0030951(establishment or maintenance of microtubule cytoskeleton polarity);GO:0051983(regulation of chromo…	NA	OK	9.10246	18.4088	-1.01607	down	0.03545	yes
XLOC_027484	XLOC_027484	ENSBTAT00000046733;ENSBTAT00000028851	ENSBTAG00000021649,IQGAP3	chr3:14306380-14354168	NA	NA	NA	NA	NA	OK	28.2574	57.1452	-1.016	down	0.0391	yes
XLOC_025461	XLOC_025461	-	-	chr27:14846520-14855483	ENSBTAG00000040118	-	Uncharacterized protein [Source:UniProtKB/TrEMBL;Acc:E1BMY6]	GO:0045095(keratin filament);GO:0005882(intermediate filament)	NA	OK	80.4488	162.024	-1.01006	down	0.0281	yes
XLOC_016621	XLOC_016621	-	-	chr19:62545794-62546575	ENSBTAG00000040118	-	Uncharacterized protein [Source:UniProtKB/TrEMBL;Acc:E1BMY6]	GO:0045095(keratin filament);GO:0005882(intermediate filament)	NA	OK	30.2835	60.9414	-1.00889	down	0.0413	yes
XLOC_029284	XLOC_029284	ENSBTAT00000012945	CDC20	chr3:103238485-103242485	ENSBTAG00000009819	CDC20	cell division cycle 20 [Source:HGNC Symbol;Acc:HGNC:1723]	GO:0005515(protein binding);GO:0031915(positive regulation of synaptic plasticity);GO:0090129(positive regulation of synapse maturation);GO:0040020(regulation of meiosis);GO:0051488(activation of anaphase-promoting complex activity);GO:0019899(enzyme binding);GO:0031145(anaphase-promoting complex-dependent proteasomal ubiquitin-dependent protein catabolic process);GO:0005654(nucleoplasm);GO:00056…	04110(Cell cycle);04114(Oocyte meiosis);04120(Ubiquitin mediated proteolysis)	OK	38.0668	76.5079	-1.00707	down	0.0283	yes
XLOC_024529	XLOC_024529	ENSBTAT00000064053	SCD	chr26:21132750-21133969	ENSBTAG00000045728	SCD	Bos taurus stearoyl-CoA desaturase (delta-9-desaturase) (SCD), mRNA. [Source:RefSeq mRNA;Acc:NM_173959]	GO:0016717(oxidoreductase activity, acting on paired donors, with oxidation of a pair of donors resulting in the reduction of molecular oxygen to two molecules of water);GO:0005506(iron ion binding);GO:0006633(fatty acid biosynthetic process);GO:0006631(fatty acid metabolic process);GO:0005789(endoplasmic reticulum membrane);GO:0006629(lipid metabolic process);GO:0055114(oxidation-reduction proce…	NA	OK	160.118	320.556	-1.00144	down	0.0319	yes
XLOC_038112	XLOC_038112	ENSBTAT00000002010	HACE1	chr9:45735181-45855545	ENSBTAG00000001533	HACE1	HECT domain and ankyrin repeat containing E3 ubiquitin protein ligase 1 [Source:HGNC Symbol;Acc:HGNC:21033]	GO:0005515(protein binding);GO:0004842(ubiquitin-protein transferase activity);GO:0016874(ligase activity);GO:0048365(Rac GTPase binding);GO:0070936(protein K48-linked ubiquitination);GO:0007030(Golgi organization);GO:0042787(protein ubiquitination involved in ubiquitin-dependent protein catabolic process);GO:0061025(membrane fusion);GO:0017137(Rab GTPase binding);GO:0000139(Golgi membrane);GO:00…	NA	OK	14.5583	29.0846	-0.998409	down	0.0269	yes
XLOC_003227	XLOC_003227	ENSBTAT00000017261	HEXA	chr10:19091912-19159271	ENSBTAG00000012981	HEXA	Bos taurus hexosaminidase A (alpha polypeptide) (HEXA), mRNA. [Source:RefSeq mRNA;Acc:NM_001075164]	GO:0004563(beta-N-acetylhexosaminidase activity);GO:0004553(hydrolase activity, hydrolyzing O-glycosyl compounds);GO:0016798(hydrolase activity, acting on glycosyl bonds);GO:0005975(carbohydrate metabolic process);GO:0005764(lysosome);GO:0016787(hydrolase activity);GO:0008152(metabolic process);GO:0030203(glycosaminoglycan metabolic process);GO:0006689(ganglioside catabolic process);GO:0042552(my…	00511(Other glycan degradation);00520(Amino sugar and nucleotide sugar metabolism);00531(Glycosaminoglycan degradation);00603(Glycosphingolipid biosynthesis - globo series);00604(Glycosphingolipid biosynthesis - ganglio series);04142(Lysosome)	OK	19.4094	38.7456	-0.997274	down	0.04265	yes
XLOC_031756	XLOC_031756	ENSBTAT00000026353	CDCA3	chr5:103961031-103963273	ENSBTAG00000019777	CDCA3	Bos taurus cell division cycle associated 3 (CDCA3), mRNA. [Source:RefSeq mRNA;Acc:NM_001035449]	GO:0051301(cell division)	NA	OK	60.1182	120.001	-0.997177	down	0.0337	yes
XLOC_036043	XLOC_036043	ENSBTAT00000015172	HSPA9	chr7:51504655-51521545	ENSBTAG00000011419	HSPA9	Bos taurus heat shock 70kDa protein 9 (mortalin) (HSPA9), mRNA. [Source:RefSeq mRNA;Acc:NM_001034524]	GO:0000902(cell morphogenesis);GO:0016773(phosphotransferase activity, alcohol group as acceptor);GO:0005730(nucleolus);GO:0051082(unfolded protein binding);GO:0006457(protein folding);GO:0005975(carbohydrate metabolic process);GO:0005739(mitochondrion);GO:0005634(nucleus);GO:0005524(ATP binding);GO:0000166(nucleotide binding);GO:0019899(enzyme binding);GO:0006611(protein export from nucleus);GO:…	03018(RNA degradation)	OK	158.842	316.732	-0.995672	down	0.0335	yes
XLOC_034734	XLOC_034734	ENSBTAT00000018391	ENSBTAG00000013834	chr7:18960638-18964880	ENSBTAG00000013834	-	Bos taurus thyroid hormone receptor interactor 10 (TRIP10), mRNA. [Source:RefSeq mRNA;Acc:NM_001081530]	GO:0005515(protein binding);GO:0030036(actin cytoskeleton organization);GO:0006897(endocytosis)	NA	OK	45.5248	22.6476	1.00729	up	0.044	yes
XLOC_009602	XLOC_009602	ENSBTAT00000044328	SLC35C1	chr15:76724921-76731746	ENSBTAG00000003199	SLC35C1	Bos taurus solute carrier family 35, member C1 (SLC35C1), mRNA. [Source:RefSeq mRNA;Acc:NM_001101210]	GO:0008643(carbohydrate transport);GO:0055085(transmembrane transport);GO:0006810(transport);GO:0005794(Golgi apparatus);GO:0000139(Golgi membrane);GO:0016021(integral component of membrane);GO:0030259(lipid glycosylation);GO:0045746(negative regulation of Notch signaling pathway);GO:0016020(membrane)	NA	OK	41.9875	20.597	1.02752	up	0.03465	yes
XLOC_004939	XLOC_004939	ENSBTAT00000032589;ENSBTAT00000016620	XDH	chr11:14176290-14281717	ENSBTAG00000012519	XDH	Bos taurus xanthine dehydrogenase (XDH), mRNA. [Source:RefSeq mRNA;Acc:NM_173972]	GO:0016614(oxidoreductase activity, acting on CH-OH group of donors);GO:0008762(UDP-N-acetylmuramate dehydrogenase activity);GO:0051536(iron-sulfur cluster binding);GO:0009055(electron carrier activity);GO:0005506(iron ion binding);GO:0050660(flavin adenine dinucleotide binding);GO:0055114(oxidation-reduction process);GO:0016491(oxidoreductase activity);GO:0046872(metal ion binding);GO:0003824(ca…	00230(Purine metabolism);00232(Caffeine metabolism);00983(Drug metabolism - other enzymes);04146(Peroxisome)	OK	146.285	71.2112	1.0386	up	0.0214	yes
XLOC_031090	XLOC_031090	ENSBTAT00000021025	FKBP11	chr5:31048545-31052006	ENSBTAG00000015828	FKBP11	Bos taurus FK506 binding protein 11, 19 kDa (FKBP11), mRNA. [Source:RefSeq mRNA;Acc:NM_001045932]	GO:0061077(chaperone-mediated protein folding);GO:0005528(FK506 binding);GO:0003755(peptidyl-prolyl cis-trans isomerase activity);GO:0000413(protein peptidyl-prolyl isomerization);GO:0006457(protein folding);GO:0005789(endoplasmic reticulum membrane);GO:0016853(isomerase activity);GO:0016020(membrane)	NA	OK	158.654	76.7	1.04858	up	0.0276	yes
XLOC_039852	XLOC_039852	ENSBTAT00000065531;ENSBTAT00000018017;ENSBTAT00000066255	GABRE	chrX:34660009-34674488	ENSBTAG00000013548	GABRE	gamma-aminobutyric acid (GABA) A receptor, epsilon [Source:HGNC Symbol;Acc:HGNC:4085]	GO:0005230(extracellular ligand-gated ion channel activity);GO:0034220(ion transmembrane transport);GO:0005216(ion channel activity);GO:0006811(ion transport);GO:0007165(signal transduction);GO:0004890(GABA-A receptor activity);GO:0006810(transport);GO:0005886(plasma membrane);GO:0016021(integral component of membrane);GO:0016020(membrane)	04080(Neuroactive ligand-receptor interaction)	OK	10.8309	5.2098	1.05585	up	0.04405	yes
XLOC_014413	XLOC_014413	ENSBTAT00000014709	MGC137708	chr18:57317722-57324156	ENSBTAG00000011079	MGC137708	Bos taurus uncharacterized LOC516719 (MGC137708), transcript variant 1, mRNA. [Source:RefSeq mRNA;Acc:NM_001046227]	NA	NA	OK	14.3805	6.86128	1.06756	up	0.04565	yes
XLOC_019133	XLOC_019133	ENSBTAT00000048744	TRIP13	chr20:71496765-71511265	ENSBTAG00000006972	TRIP13	thyroid hormone receptor interactor 13 [Source:HGNC Symbol;Acc:HGNC:12307]	GO:0017111(nucleoside-triphosphatase activity);GO:0005524(ATP binding);GO:0000166(nucleotide binding);GO:0007144(female meiosis I);GO:0007141(male meiosis I);GO:0007131(reciprocal meiotic recombination);GO:0048477(oogenesis);GO:0001673(male germ cell nucleus);GO:0007130(synaptonemal complex assembly);GO:0007286(spermatid development);GO:0006302(double-strand break repair);GO:0001556(oocyte matura…	NA	OK	18.8347	8.97252	1.06981	up	0.0319	yes
XLOC_029247	XLOC_029247	ENSBTAT00000020401;ENSBTAT00000057267	NASP	chr3:101061896-101090570	ENSBTAG00000015346	NASP	Bos taurus nuclear autoantigenic sperm protein (histone-binding) (NASP), mRNA. [Source:RefSeq mRNA;Acc:NM_001038088]	GO:0051879(Hsp90 protein binding);GO:0005515(protein binding);GO:0008283(cell proliferation);GO:0006260(DNA replication);GO:0007049(cell cycle);GO:0015031(protein transport);GO:0006810(transport);GO:0005634(nucleus);GO:0005737(cytoplasm);GO:0042393(histone binding);GO:0006336(DNA replication-independent nucleosome assembly);GO:0006335(DNA replication-dependent nucleosome assembly);GO:0000790(nucl…	NA	OK	36.3355	17.2103	1.07811	up	0.03365	yes
XLOC_005854	XLOC_005854	ENSBTAT00000004569	SLAIN1	chr12:53188750-53241317	ENSBTAG00000003511	SLAIN1	SLAIN motif family, member 1 [Source:HGNC Symbol;Acc:HGNC:26387]	NA	NA	OK	18.5424	8.7241	1.08775	up	0.0349	yes
XLOC_026813	XLOC_026813	ENSBTAT00000001624	SLC25A22	chr29:50835239-50839686	ENSBTAG00000001229	SLC25A22	Bos taurus solute carrier family 25 (mitochondrial carrier: glutamate), member 22 (SLC25A22), mRNA. [Source:RefSeq mRNA;Acc:NM_001075159]	GO:0015293(symporter activity);GO:0005743(mitochondrial inner membrane);GO:0005739(mitochondrion);GO:0055085(transmembrane transport);GO:0006810(transport);GO:0016021(integral component of membrane);GO:0015813(L-glutamate transport);GO:0089711(L-glutamate transmembrane transport);GO:0005313(L-glutamate transmembrane transporter activity);GO:0005654(nucleoplasm);GO:0016020(membrane)	NA	OK	16.51	7.75882	1.08943	up	0.0303	yes
XLOC_012797	XLOC_012797	ENSBTAT00000045245	UNG	chr17:66221120-66231818	ENSBTAG00000019848	UNG	Bos taurus uracil-DNA glycosylase (UNG), mRNA. [Source:RefSeq mRNA;Acc:NM_001075513]	GO:0016799(hydrolase activity, hydrolyzing N-glycosyl compounds);GO:0006284(base-excision repair);GO:0016798(hydrolase activity, acting on glycosyl bonds);GO:0006974(cellular response to DNA damage stimulus);GO:0006281(DNA repair);GO:0005739(mitochondrion);GO:0016787(hydrolase activity);GO:0008152(metabolic process);GO:0005634(nucleus);GO:0004844(uracil DNA N-glycosylase activity);GO:0016447(soma…	03410(Base excision repair);05340(Primary immunodeficiency)	OK	28.5182	13.3399	1.09613	up	0.0221	yes
XLOC_032581	XLOC_032581	ENSBTAT00000015804	CKAP4	chr5:69971265-69979795	ENSBTAG00000011913	CKAP4	cytoskeleton-associated protein 4 [Source:HGNC Symbol;Acc:HGNC:16991]	GO:0005783(endoplasmic reticulum);GO:0005811(lipid particle);GO:0070062(extracellular vesicular exosome);GO:0044822(poly(A) RNA binding)	NA	OK	68.3579	31.8884	1.10007	up	0.01855	yes
XLOC_019590	XLOC_019590	ENSBTAT00000009871	CKMT1	chr21:55876474-55882402	ENSBTAG00000007502	CKMT1	Bos taurus creatine kinase, mitochondrial 1B (CKMT1B), mRNA. [Source:RefSeq mRNA;Acc:NM_174275]	GO:0016772(transferase activity, transferring phosphorus-containing groups);GO:0005743(mitochondrial inner membrane);GO:0005739(mitochondrion);GO:0016310(phosphorylation);GO:0016301(kinase activity);GO:0016740(transferase activity);GO:0003824(catalytic activity);GO:0005524(ATP binding);GO:0000166(nucleotide binding);GO:0032091(negative regulation of protein binding);GO:0043066(negative regulation…	00330(Arginine and proline metabolism)	OK	11.0021	5.1227	1.1028	up	0.04035	yes
XLOC_001351	XLOC_001351	ENSBTAT00000046421	TFRC	chr1:71257332-71287366	ENSBTAG00000032719	TFRC	transferrin receptor protein 1 [Source:RefSeq peptide;Acc:NP_001193506]	GO:0008233(peptidase activity);GO:0006508(proteolysis);GO:0045780(positive regulation of bone resorption);GO:0070062(extracellular vesicular exosome);GO:0005905(coated pit);GO:0006879(cellular iron ion homeostasis);GO:0030316(osteoclast differentiation);GO:0048471(perinuclear region of cytoplasm);GO:0009897(external side of plasma membrane);GO:0005768(endosome);GO:0005515(protein binding);GO:0005…	04144(Endocytosis);04145(Phagosome);04640(Hematopoietic cell lineage)	OK	66.3901	30.7506	1.11035	up	0.02085	yes
XLOC_016082	XLOC_016082	ENSBTAT00000009974	ADORA2B	chr19:34084442-34104983	ENSBTAG00000007581	ADORA2B	Bos taurus adenosine A2b receptor (ADORA2B), mRNA. [Source:RefSeq mRNA;Acc:NM_001075925]	GO:0001973(adenosine receptor signaling pathway);GO:0007186(G-protein coupled receptor signaling pathway);GO:0007165(signal transduction);GO:0004930(G-protein coupled receptor activity);GO:0004871(signal transducer activity);GO:0005886(plasma membrane);GO:0016021(integral component of membrane);GO:0002882(positive regulation of chronic inflammatory response to non-antigenic stimulus);GO:0010575(p…	04020(Calcium signaling pathway);04080(Neuroactive ligand-receptor interaction);04270(Vascular smooth muscle contraction)	OK	13.6222	6.28573	1.1158	up	0.03385	yes
XLOC_033047	XLOC_033047	ENSBTAT00000009998	FKBP4	chr5:107445595-107453517	ENSBTAG00000007605	FKBP4	Bos taurus FK506 binding protein 4, 59kDa (FKBP4), mRNA. [Source:RefSeq mRNA;Acc:NM_001034322]	GO:0005515(protein binding);GO:0061077(chaperone-mediated protein folding);GO:0005528(FK506 binding);GO:0003755(peptidyl-prolyl cis-trans isomerase activity);GO:0000413(protein peptidyl-prolyl isomerization);GO:0006457(protein folding);GO:0005789(endoplasmic reticulum membrane);GO:0051219(phosphoprotein binding);GO:0046661(male sex differentiation);GO:0035259(glucocorticoid receptor binding);GO:0…	NA	OK	143.871	65.716	1.13046	up	0.01175	yes
XLOC_013061	XLOC_013061	ENSBTAT00000000568	TUBB3	chr18:14761259-14769914	ENSBTAG00000023730	TUBB3	Bos taurus tubulin, beta 3 class III (TUBB3), mRNA. [Source:RefSeq mRNA;Acc:NM_001077127]	GO:0051258(protein polymerization);GO:0007017(microtubule-based process);GO:0003924(GTPase activity);GO:0006184(GTP catabolic process);GO:0007411(axon guidance);GO:0005525(GTP binding);GO:0043234(protein complex);GO:0005874(microtubule);GO:0005856(cytoskeleton);GO:0005737(cytoplasm);GO:0000166(nucleotide binding);GO:0070062(extracellular vesicular exosome);GO:0005515(protein binding);GO:0005634(n…	04145(Phagosome);04540(Gap junction)	OK	100.385	45.7847	1.13261	up	0.0152	yes
XLOC_021481	XLOC_021481	ENSBTAT00000035844	PAQR8	chr23:24528143-24572577	ENSBTAG00000025494	PAQR8	Bos taurus progestin and adipoQ receptor family member VIII (PAQR8), mRNA. [Source:RefSeq mRNA;Acc:NM_001101135]	GO:0048545(response to steroid hormone);GO:0005496(steroid binding);GO:0043401(steroid hormone mediated signaling pathway);GO:0003707(steroid hormone receptor activity);GO:0005886(plasma membrane);GO:0016021(integral component of membrane)	NA	OK	18.5634	8.45001	1.13544	up	0.0177	yes
XLOC_009245	XLOC_009245	ENSBTAT00000003784	GALNTL4	chr15:41624125-41980708	ENSBTAG00000002914	GALNTL4	Bos taurus UDP-N-acetyl-alpha-D-galactosamine:polypeptide N-acetylgalactosaminyltransferase-like 4 (GALNTL4), mRNA. [Source:RefSeq mRNA;Acc:NM_001076316]	GO:0006486(protein glycosylation);GO:0016757(transferase activity, transferring glycosyl groups);GO:0016740(transferase activity);GO:0005794(Golgi apparatus);GO:0046872(metal ion binding);GO:0016021(integral component of membrane);GO:0016020(membrane)	00512(O-Glycan biosynthesis)	OK	10.7367	4.87465	1.13918	up	0.0266	yes
XLOC_032064	XLOC_032064	ENSBTAT00000017835	CSRP2	chr5:6266017-6274473	ENSBTAG00000013406	CSRP2	Bos taurus cysteine and glycine-rich protein 2 (CSRP2), mRNA. [Source:RefSeq mRNA;Acc:NM_001038183]	GO:0030154(cell differentiation);GO:0007275(multicellular organismal development);GO:0046872(metal ion binding);GO:0008270(zinc ion binding);GO:0005634(nucleus);GO:0005515(protein binding);GO:0005925(focal adhesion)	NA	OK	84.7713	38.3191	1.14551	up	0.0156	yes
XLOC_001810	XLOC_001810	ENSBTAT00000044444	ENSBTAG00000023411	chr1:136746748-136790700	ENSBTAG00000023411	-	Bos taurus serotransferrin-like (LOC525947), mRNA. [Source:RefSeq mRNA;Acc:NM_001046279]	GO:0008199(ferric iron binding);GO:0006879(cellular iron ion homeostasis);GO:0006826(iron ion transport);GO:0004857(enzyme inhibitor activity);GO:0005576(extracellular region)	NA	OK	36.8256	16.6183	1.14794	up	0.0151	yes
XLOC_025708	XLOC_025708	-	-	chr28:8945253-8945647	ENSBTAG00000040118	-	Uncharacterized protein [Source:UniProtKB/TrEMBL;Acc:E1BMY6]	GO:0045095(keratin filament);GO:0005882(intermediate filament)	NA	OK	173.72	77.9806	1.15557	up	0.02335	yes
XLOC_037673	XLOC_037673	ENSBTAT00000004312	NOL6	chr8:76540580-76552717	ENSBTAG00000003323	NOL6	Bos taurus nucleolar protein family 6 (RNA-associated) (NOL6), mRNA. [Source:RefSeq mRNA;Acc:NM_001099185]	GO:0000794(condensed nuclear chromosome);GO:0005730(nucleolus);GO:0003723(RNA binding);GO:0044822(poly(A) RNA binding);GO:0005739(mitochondrion);GO:0005634(nucleus)	NA	OK	12.6447	5.66472	1.15846	up	0.01535	yes
XLOC_026510	XLOC_026510	ENSBTAT00000024427	TMEM109	chr29:37833098-37841873	ENSBTAG00000018362	TMEM109	Bos taurus transmembrane protein 109 (TMEM109), mRNA. [Source:RefSeq mRNA;Acc:NM_001046470]	GO:0016021(integral component of membrane);GO:0042771(intrinsic apoptotic signaling pathway in response to DNA damage by p53 class mediator);GO:0005515(protein binding);GO:0071480(cellular response to gamma radiation);GO:0060548(negative regulation of cell death);GO:0070062(extracellular vesicular exosome)	NA	OK	40.3826	18.0649	1.16054	up	0.0149	yes
XLOC_007825	XLOC_007825	ENSBTAT00000010191	TONSL	chr14:1681493-1692546	ENSBTAG00000007749	TONSL	Bos taurus tonsoku-like, DNA repair protein (TONSL), mRNA. [Source:RefSeq mRNA;Acc:NM_001075188]	GO:0000724(double-strand break repair via homologous recombination);GO:0005515(protein binding);GO:0042555(MCM complex);GO:0042393(histone binding);GO:0006974(cellular response to DNA damage stimulus);GO:0006281(DNA repair);GO:0005634(nucleus);GO:0005737(cytoplasm);GO:0035101(FACT complex);GO:0043596(nuclear replication fork);GO:0005662(DNA replication factor A complex);GO:0031297(replication for…	NA	OK	12.3228	5.42909	1.18254	up	0.0189	yes
XLOC_007238	XLOC_007238	ENSBTAT00000057357	PFKFB3	chr13:17380739-17406773	ENSBTAG00000008401	PFKFB3	Bos taurus 6-phosphofructo-2-kinase/fructose-2,6-biphosphatase 3 (PFKFB3), mRNA. [Source:RefSeq mRNA;Acc:NM_001077837]	GO:0046835(carbohydrate phosphorylation);GO:0006003(fructose 2,6-bisphosphate metabolic process);GO:0006000(fructose metabolic process);GO:0004331(fructose-2,6-bisphosphate 2-phosphatase activity);GO:0003873(6-phosphofructo-2-kinase activity);GO:0016310(phosphorylation);GO:0016301(kinase activity);GO:0008152(metabolic process);GO:0003824(catalytic activity);GO:0005524(ATP binding);GO:0016311(deph…	00051(Fructose and mannose metabolism)	OK	39.4839	17.3582	1.18565	up	0.00885	yes
XLOC_018913	XLOC_018913	ENSBTAT00000018036	SKP2	chr20:38078170-38116393	ENSBTAG00000013562	SKP2	Bos taurus S-phase kinase-associated protein 2 (p45) (SKP2), mRNA. [Source:RefSeq mRNA;Acc:NM_001102052]	GO:0005515(protein binding)	NA	OK	11.1115	4.87252	1.18931	up	0.03565	yes
XLOC_007471	XLOC_007471	ENSBTAT00000044985	SLC17A9	chr13:54916946-54931311	ENSBTAG00000001829	SLC17A9	Bos taurus solute carrier family 17, member 9 (SLC17A9), mRNA. [Source:RefSeq mRNA;Acc:NM_001100378]	GO:0005215(transporter activity);GO:0055085(transmembrane transport);GO:0006810(transport);GO:0016021(integral component of membrane);GO:0016020(membrane)	NA	OK	21.5932	9.33365	1.21006	up	0.01525	yes
XLOC_024070	XLOC_024070	ENSBTAT00000014406	DCTPP1	chr25:26851887-26855546	ENSBTAG00000039962	DCTPP1	Bos taurus dCTP pyrophosphatase 1 (DCTPP1), mRNA. [Source:RefSeq mRNA;Acc:NM_001038202]	GO:0032556(pyrimidine deoxyribonucleotide binding);GO:0047429(nucleoside-triphosphate diphosphatase activity);GO:0009143(nucleoside triphosphate catabolic process);GO:0016462(pyrophosphatase activity);GO:0051289(protein homotetramerization);GO:0000287(magnesium ion binding);GO:0005829(cytosol)	NA	OK	45.569	19.5936	1.21767	up	0.02255	yes
XLOC_015114	XLOC_015114	ENSBTAT00000034888	HOXB9	chr19:38503076-38508191	ENSBTAG00000025009	HOXB9	Bos taurus homeobox B9 (HOXB9), mRNA. [Source:RefSeq mRNA;Acc:NM_001191186]	GO:0043565(sequence-specific DNA binding);GO:0006351(transcription, DNA-templated);GO:0003700(sequence-specific DNA binding transcription factor activity);GO:0003677(DNA binding);GO:0006355(regulation of transcription, DNA-templated);GO:0005634(nucleus);GO:0048706(embryonic skeletal system development);GO:0030879(mammary gland development);GO:0009952(anterior/posterior pattern specification);GO:0…	NA	OK	13.6184	5.8523	1.21848	up	0.01905	yes
XLOC_038520	XLOC_038520	ENSBTAT00000004332	TPD52L1	chr9:26310564-26403759	ENSBTAG00000003336	TPD52L1	Bos taurus tumor protein D52-like 1 (TPD52L1), mRNA. [Source:RefSeq mRNA;Acc:NM_001076033]	GO:2001235(positive regulation of apoptotic signaling pathway);GO:0043281(regulation of cysteine-type endopeptidase activity involved in apoptotic process);GO:0043406(positive regulation of MAP kinase activity);GO:0046330(positive regulation of JNK cascade);GO:0000086(G2/M transition of mitotic cell cycle);GO:0042803(protein homodimerization activity);GO:0042802(identical protein binding);GO:0005…	NA	OK	22.9804	9.8669	1.21973	up	0.02135	yes
XLOC_037730	XLOC_037730	ENSBTAT00000008649	ZNF367	chr8:84512136-84538327	ENSBTAG00000006587	ZNF367	Bos taurus zinc finger protein 367 (ZNF367), mRNA. [Source:RefSeq mRNA;Acc:NM_001206033]	GO:0046872(metal ion binding);GO:0003676(nucleic acid binding);GO:0005654(nucleoplasm);GO:0006357(regulation of transcription from RNA polymerase II promoter);GO:0003700(sequence-specific DNA binding transcription factor activity);GO:0005634(nucleus)	NA	OK	19.7826	8.49294	1.21989	up	0.0245	yes
XLOC_001815	XLOC_001815	-	-	chr1:137794301-137794440	ENSBTAG00000040118	-	Uncharacterized protein [Source:UniProtKB/TrEMBL;Acc:E1BMY6]	GO:0045095(keratin filament);GO:0005882(intermediate filament)	NA	OK	12466.5	5341.58	1.22272	up	0.0316	yes
XLOC_040223	XLOC_040223	-	-	chrX:96212738-96213254	ENSBTAG00000040118	-	Uncharacterized protein [Source:UniProtKB/TrEMBL;Acc:E1BMY6]	GO:0045095(keratin filament);GO:0005882(intermediate filament)	NA	OK	31.1698	13.3437	1.22399	up	0.0345	yes
XLOC_019079	XLOC_019079	-	-	chr20:67937680-67939131	ENSBTAG00000040118	-	Uncharacterized protein [Source:UniProtKB/TrEMBL;Acc:E1BMY6]	GO:0045095(keratin filament);GO:0005882(intermediate filament)	NA	OK	14.5734	6.23109	1.22578	up	0.0289	yes
XLOC_023802	XLOC_023802	ENSBTAT00000000348	RAB26	chr25:1680109-1687411	ENSBTAG00000000279	RAB26	Bos taurus RAB26, member RAS oncogene family (RAB26), mRNA. [Source:RefSeq mRNA;Acc:NM_001046209]	GO:0006913(nucleocytoplasmic transport);GO:0017157(regulation of exocytosis);GO:0003924(GTPase activity);GO:0006184(GTP catabolic process);GO:0007264(small GTPase mediated signal transduction);GO:0005525(GTP binding);GO:0007165(signal transduction);GO:0005622(intracellular);GO:0015031(protein transport);GO:0006886(intracellular protein transport);GO:0006810(transport);GO:0005886(plasma membrane);…	NA	OK	19.0272	8.13535	1.22579	up	0.0413	yes
XLOC_026530	XLOC_026530	ENSBTAT00000000071	FEN1	chr29:40931651-40936454	ENSBTAG00000000064	FEN1	Bos taurus flap structure-specific endonuclease 1 (FEN1), mRNA. [Source:RefSeq mRNA;Acc:NM_001035113]	GO:0004519(endonuclease activity);GO:0006260(DNA replication);GO:0016788(hydrolase activity, acting on ester bonds);GO:0006284(base-excision repair);GO:0005730(nucleolus);GO:0005654(nucleoplasm);GO:0000287(magnesium ion binding);GO:0000737(DNA catabolic process, endonucleolytic);GO:0006974(cellular response to DNA damage stimulus);GO:0006281(DNA repair);GO:0005739(mitochondrion);GO:0090305(nuclei…	03030(DNA replication);03410(Base excision repair);03450(Non-homologous end-joining)	OK	18.1726	7.73723	1.23188	up	0.0197	yes
XLOC_022329	XLOC_022329	ENSBTAT00000025614	BMP6	chr23:47354093-47510231	ENSBTAG00000019234	BMP6	bone morphogenetic protein 6 [Source:HGNC Symbol;Acc:HGNC:1073]	GO:0040007(growth);GO:0008083(growth factor activity);GO:0001938(positive regulation of endothelial cell proliferation);GO:0045603(positive regulation of endothelial cell differentiation);GO:0030539(male genitalia development);GO:0001649(osteoblast differentiation);GO:0001822(kidney development);GO:0045666(positive regulation of neuron differentiation);GO:0030509(BMP signaling pathway);GO:0006954…	NA	OK	10.5157	4.46916	1.23446	up	0.024	yes
XLOC_017333	XLOC_017333	ENSBTAT00000020254	RSRP1	chr2:128302926-128307122	ENSBTAG00000015222	RSRP1	arginine/serine-rich protein 1 [Source:HGNC Symbol;Acc:HGNC:25234]	NA	NA	OK	16.1178	6.64144	1.27909	up	0.01675	yes
XLOC_037850	XLOC_037850	-	-	chr8:104339523-104340218	ENSBTAG00000040118	-	Uncharacterized protein [Source:UniProtKB/TrEMBL;Acc:E1BMY6]	GO:0045095(keratin filament);GO:0005882(intermediate filament)	NA	OK	19.1099	7.87431	1.2791	up	0.0407	yes
XLOC_025676	XLOC_025676	-	-	chr28:3619448-3619740	ENSBTAG00000040118	-	Uncharacterized protein [Source:UniProtKB/TrEMBL;Acc:E1BMY6]	GO:0045095(keratin filament);GO:0005882(intermediate filament)	NA	OK	270.177	110.802	1.28592	up	0.02135	yes
XLOC_024478	XLOC_024478	ENSBTAT00000007848	HELLS	chr26:15857303-15898080	ENSBTAG00000005979	HELLS	helicase, lymphoid-specific [Source:HGNC Symbol;Acc:HGNC:4861]	GO:0003677(DNA binding);GO:0004386(helicase activity);GO:0005524(ATP binding);GO:0003676(nucleic acid binding);GO:0031508(pericentric heterochromatin assembly);GO:0010216(maintenance of DNA methylation);GO:0005721(pericentric heterochromatin);GO:0046651(lymphocyte proliferation);GO:0001655(urogenital system development);GO:0006342(chromatin silencing);GO:0006346(methylation-dependent chromatin si…	NA	OK	14.8729	6.02584	1.30345	up	0.0082	yes
XLOC_021448	XLOC_021448	ENSBTAT00000035955	SLC29A1	chr23:17845968-17856150	ENSBTAG00000015131	SLC29A1	Bos taurus solute carrier family 29 (nucleoside transporters), member 1 (SLC29A1), mRNA. [Source:RefSeq mRNA;Acc:NM_001034398]	GO:1901642(nucleoside transmembrane transport);GO:0005337(nucleoside transmembrane transporter activity);GO:0006810(transport);GO:0016021(integral component of membrane);GO:0015858(nucleoside transport);GO:0016324(apical plasma membrane);GO:0016323(basolateral plasma membrane);GO:0016020(membrane)	NA	OK	29.4324	11.9061	1.30571	up	0.0078	yes
XLOC_006536	XLOC_006536	ENSBTAT00000007987	IL15RA	chr13:17604139-17640982	ENSBTAG00000006078	IL15RA	interleukin 15 receptor, alpha [Source:HGNC Symbol;Acc:HGNC:5978]	GO:0032825(positive regulation of natural killer cell differentiation);GO:0031410(cytoplasmic vesicle);GO:0005886(plasma membrane)	NA	OK	10.1215	4.08318	1.30966	up	0.0185	yes
XLOC_037846	XLOC_037846	-	-	chr8:104336256-104336774	ENSBTAG00000040118	-	Uncharacterized protein [Source:UniProtKB/TrEMBL;Acc:E1BMY6]	GO:0045095(keratin filament);GO:0005882(intermediate filament)	NA	OK	18.6847	7.53502	1.31018	up	0.04655	yes
XLOC_014723	XLOC_014723	ENSBTAT00000042276	bta-mir-21	chr19:11032500-11034659	ENSBTAG00000029897	bta-mir-21	bta-mir-21 [Source:miRBase;Acc:MI0004742]	NA	NA	OK	21.0901	8.49336	1.31216	up	0.0081	yes
XLOC_019082	XLOC_019082	-	-	chr20:67940693-67941307	ENSBTAG00000040118	-	Uncharacterized protein [Source:UniProtKB/TrEMBL;Acc:E1BMY6]	GO:0045095(keratin filament);GO:0005882(intermediate filament)	NA	OK	16.0561	6.40717	1.32536	up	0.0494	yes
XLOC_004423	XLOC_004423	ENSBTAT00000028063	DTNB	chr11:73693766-73935363	ENSBTAG00000021072	DTNB	dystrobrevin, beta [Source:HGNC Symbol;Acc:HGNC:3058]	GO:0005509(calcium ion binding);GO:0008270(zinc ion binding);GO:0005737(cytoplasm);GO:0005515(protein binding);GO:0045202(synapse)	NA	OK	35.363	14.0525	1.33141	up	0.01405	yes
XLOC_005309	XLOC_005309	ENSBTAT00000021347	TRIB2	chr11:85205521-85234206	ENSBTAG00000016045	TRIB2	Bos taurus tribbles homolog 2 (Drosophila) (TRIB2), mRNA. [Source:RefSeq mRNA;Acc:NM_178317]	GO:0006469(negative regulation of protein kinase activity);GO:0004860(protein kinase inhibitor activity);GO:0004713(protein tyrosine kinase activity);GO:0016772(transferase activity, transferring phosphorus-containing groups);GO:0006468(protein phosphorylation);GO:0004672(protein kinase activity);GO:0005856(cytoskeleton);GO:0008152(metabolic process);GO:0005737(cytoplasm);GO:0005524(ATP binding);…	NA	OK	12.2455	4.8386	1.3396	up	0.02905	yes
XLOC_024843	XLOC_024843	ENSBTAT00000015584	ANKRD1	chr26:12571208-12580580	ENSBTAG00000011734	ANKRD1	Bos taurus ankyrin repeat domain 1 (cardiac muscle) (ANKRD1), mRNA. [Source:RefSeq mRNA;Acc:NM_001034378]	GO:0005515(protein binding);GO:0005634(nucleus);GO:0031432(titin binding);GO:0030016(myofibril);GO:0071222(cellular response to lipopolysaccharide);GO:0031674(I band);GO:0035690(cellular response to drug);GO:0003714(transcription corepressor activity);GO:0035914(skeletal muscle cell differentiation);GO:0005667(transcription factor complex);GO:0006357(regulation of transcription from RNA polymeras…	NA	OK	71.0926	28.046	1.3419	up	0.00465	yes
XLOC_034493	XLOC_034493	ENSBTAT00000048089;ENSBTAT00000063901	CIST1	chr7:4843441-4910673	ENSBTAG00000033886	CIST1	Bos taurus intestine-specific transcript 1 protein (CIST1), mRNA. [Source:RefSeq mRNA;Acc:NM_001075271]	NA	NA	OK	11.1341	4.34879	1.3563	up	0.04175	yes
XLOC_025649	XLOC_025649	ENSBTAT00000013435	URB2	chr28:596883-623066	ENSBTAG00000010180	URB2	URB2 ribosome biogenesis 2 homolog (S. cerevisiae) [Source:HGNC Symbol;Acc:HGNC:28967]	GO:0016235(aggresome);GO:0005730(nucleolus);GO:0005634(nucleus)	NA	OK	11.2976	4.40538	1.35867	up	0.0048	yes
XLOC_003741	XLOC_003741	ENSBTAT00000064532	GPX2	chr10:77381299-77384955	ENSBTAG00000048112	GPX2	Bos taurus glutathione peroxidase 2 (gastrointestinal) (GPX2), mRNA. [Source:RefSeq mRNA;Acc:NM_001163139]	GO:0004602(glutathione peroxidase activity);GO:0004601(peroxidase activity);GO:0006979(response to oxidative stress);GO:0055114(oxidation-reduction process);GO:0016491(oxidoreductase activity);GO:0051702(interaction with symbiont);GO:0009609(response to symbiotic bacterium);GO:0002862(negative regulation of inflammatory response to antigenic stimulus);GO:0001659(temperature homeostasis);GO:007006…	NA	OK	37.154	14.4275	1.3647	up	0.00955	yes
XLOC_030522	XLOC_030522	ENSBTAT00000065419	PRR15	chr4:67039122-67042478	ENSBTAG00000045567	PRR15	proline rich 15 [Source:HGNC Symbol;Acc:HGNC:22310]	NA	NA	OK	26.0868	10.1103	1.36749	up	0.00645	yes
XLOC_007382	XLOC_007382	ENSBTAT00000007967	PCNA	chr13:47788529-47799920	ENSBTAG00000006065	PCNA	Bos taurus proliferating cell nuclear antigen (PCNA), mRNA. [Source:RefSeq mRNA;Acc:NM_001034494]	GO:0030337(DNA polymerase processivity factor activity);GO:0019985(translesion synthesis);GO:0006260(DNA replication);GO:0006298(mismatch repair);GO:0006974(cellular response to DNA damage stimulus);GO:0006281(DNA repair);GO:0003677(DNA binding);GO:0005634(nucleus);GO:0070557(PCNA-p21 complex);GO:0032405(MutLalpha complex binding);GO:0032139(dinucleotide insertion or deletion binding);GO:0032077(…	03030(DNA replication);03410(Base excision repair);03420(Nucleotide excision repair);03430(Mismatch repair);04110(Cell cycle)	OK	115.811	44.6101	1.37633	up	0.00285	yes
XLOC_014245	XLOC_014245	ENSBTAT00000003340	FBL	chr18:49659187-49718941	ENSBTAG00000002579	FBL	Bos taurus fibrillarin (FBL), mRNA. [Source:RefSeq mRNA;Acc:NM_001205400]	GO:0006364(rRNA processing);GO:0032259(methylation);GO:0008168(methyltransferase activity);GO:0008033(tRNA processing);GO:0003723(RNA binding);GO:0016074(snoRNA metabolic process);GO:0001652(granular component);GO:0015030(Cajal body);GO:0005730(nucleolus);GO:1990259(histone-glutamine methyltransferase activity);GO:1990258(histone glutamine methylation);GO:0001649(osteoblast differentiation);GO:00…	NA	OK	257.857	98.2289	1.39235	up	0.0186	yes
XLOC_016871	XLOC_016871	ENSBTAT00000055538	MCM6	chr2:61821887-61852265	ENSBTAG00000015172	MCM6	Bos taurus minichromosome maintenance complex component 6 (MCM6), mRNA. [Source:RefSeq mRNA;Acc:NM_001046234]	GO:0042555(MCM complex);GO:0006270(DNA replication initiation);GO:0003678(DNA helicase activity);GO:0006260(DNA replication);GO:0003677(DNA binding);GO:0004386(helicase activity);GO:0016787(hydrolase activity);GO:0005634(nucleus);GO:0005524(ATP binding);GO:0000166(nucleotide binding);GO:0006268(DNA unwinding involved in DNA replication);GO:0003697(single-stranded DNA binding);GO:0005515(protein b…	03030(DNA replication);04110(Cell cycle)	OK	50.2023	19.022	1.40008	up	0.0032	yes
XLOC_023803	XLOC_023803	-	-	chr25:1688160-1688496	ENSBTAG00000040118	-	Uncharacterized protein [Source:UniProtKB/TrEMBL;Acc:E1BMY6]	GO:0045095(keratin filament);GO:0005882(intermediate filament)	NA	OK	45.5432	17.2069	1.40425	up	0.03425	yes
XLOC_007581	XLOC_007581	ENSBTAT00000005182;ENSBTAT00000053065	E2F1,PXMP4	chr13:63704830-63743492	NA	NA	NA	NA	NA	OK	14.245	5.33819	1.41604	up	0.01955	yes
XLOC_036431	XLOC_036431	ENSBTAT00000007324	CLU	chr8:11043940-11061301	ENSBTAG00000005574	CLU	Bos taurus clusterin (CLU), mRNA. [Source:RefSeq mRNA;Acc:NM_173902]	GO:0061077(chaperone-mediated protein folding);GO:0043065(positive regulation of apoptotic process);GO:0031012(extracellular matrix);GO:0043231(intracellular membrane-bounded organelle);GO:0050821(protein stabilization);GO:0031625(ubiquitin protein ligase binding);GO:0042583(chromaffin granule);GO:0005615(extracellular space);GO:0031966(mitochondrial membrane);GO:0005829(cytosol);GO:0048471(perin…	NA	OK	2419.16	905.93	1.41704	up	0.0081	yes
XLOC_020747	XLOC_020747	ENSBTAT00000012611	CDC25A	chr22:52242565-52265777	ENSBTAG00000009586	CDC25A	Bos taurus cell division cycle 25 homolog A (S. pombe) (CDC25A), mRNA. [Source:RefSeq mRNA;Acc:NM_001101100]	GO:0009314(response to radiation);GO:0004721(phosphoprotein phosphatase activity);GO:0051301(cell division);GO:0007067(mitotic nuclear division);GO:0007049(cell cycle);GO:0005622(intracellular);GO:0016787(hydrolase activity);GO:0035335(peptidyl-tyrosine dephosphorylation);GO:0005737(cytoplasm);GO:0005634(nucleus);GO:0006470(protein dephosphorylation);GO:0004725(protein tyrosine phosphatase activi…	04110(Cell cycle);04914(Progesterone-mediated oocyte maturation)	OK	12.3325	4.61405	1.41836	up	0.00855	yes
XLOC_032481	XLOC_032481	ENSBTAT00000005252	CDK2	chr5:57663665-57669068	ENSBTAG00000004021	CDK2	Bos taurus cyclin-dependent kinase 2 (CDK2), mRNA. [Source:RefSeq mRNA;Acc:NM_001014934]	GO:0007126(meiotic nuclear division);GO:0015030(Cajal body);GO:0045893(positive regulation of transcription, DNA-templated);GO:0051726(regulation of cell cycle);GO:0006813(potassium ion transport);GO:0005667(transcription factor complex);GO:0051301(cell division);GO:0007067(mitotic nuclear division);GO:0004713(protein tyrosine kinase activity);GO:0006974(cellular response to DNA damage stimulus);…	04110(Cell cycle);04114(Oocyte meiosis);04115(p53 signaling pathway);04914(Progesterone-mediated oocyte maturation);05200(Pathways in cancer);05215(Prostate cancer);05222(Small cell lung cancer)	OK	41.7746	15.5916	1.42186	up	0.005	yes
XLOC_003471	XLOC_003471	ENSBTAT00000006775	PLA2G4F	chr10:37649133-37664901	ENSBTAG00000032068	PLA2G4F	phospholipase A2, group IVF [Source:HGNC Symbol;Acc:HGNC:27396]	GO:0005515(protein binding);GO:0009395(phospholipid catabolic process);GO:0004620(phospholipase activity);GO:0008152(metabolic process);GO:0047498(calcium-dependent phospholipase A2 activity);GO:0071236(cellular response to antibiotic);GO:0050482(arachidonic acid secretion);GO:0001516(prostaglandin biosynthetic process);GO:0032587(ruffle membrane);GO:0004623(phospholipase A2 activity);GO:0015908(…	NA	OK	21.9842	8.14561	1.43237	up	0.00215	yes
XLOC_019837	XLOC_019837	ENSBTAT00000023435	SIVA1	chr21:70870008-70874416	ENSBTAG00000017622	SIVA1	SIVA1, apoptosis-inducing factor [Source:HGNC Symbol;Acc:HGNC:17712]	GO:1901030(positive regulation of mitochondrial outer membrane permeabilization involved in apoptotic signaling pathway);GO:0006924(activation-induced cell death of T cells);GO:0005175(CD27 receptor binding);GO:0097193(intrinsic apoptotic signaling pathway);GO:0097191(extrinsic apoptotic signaling pathway);GO:0032088(negative regulation of NF-kappaB transcription factor activity);GO:0005654(nucle…	NA	OK	17.4138	6.43068	1.43719	up	0.026	yes
XLOC_004209	XLOC_004209	ENSBTAT00000003556	MSH2	chr11:29648304-29730536	ENSBTAG00000002742	MSH2	Bos taurus mutS homolog 2, colon cancer, nonpolyposis type 1 (E. coli) (MSH2), mRNA. [Source:RefSeq mRNA;Acc:NM_001034584]	GO:0043570(maintenance of DNA repeat elements);GO:0032302(MutSbeta complex);GO:0000710(meiotic mismatch repair);GO:0000406(double-strand/single-strand DNA junction binding);GO:0000404(heteroduplex DNA loop binding);GO:0000403(Y-form DNA binding);GO:0000228(nuclear chromosome);GO:0008094(DNA-dependent ATPase activity);GO:0003684(damaged DNA binding);GO:0030983(mismatched DNA binding);GO:0006298(mi…	03430(Mismatch repair);05200(Pathways in cancer);05210(Colorectal cancer)	OK	18.825	6.92007	1.44379	up	0.0039	yes
XLOC_013632	XLOC_013632	ENSBTAT00000014714	POLD1	chr18:57008174-57028488	ENSBTAG00000011083	POLD1	polymerase (DNA directed), delta 1, catalytic subunit [Source:HGNC Symbol;Acc:HGNC:9175]	GO:0003887(DNA-directed DNA polymerase activity);GO:0006260(DNA replication);GO:0006139(nucleobase-containing compound metabolic process);GO:0016779(nucleotidyltransferase activity);GO:0003677(DNA binding);GO:0016740(transferase activity);GO:0003676(nucleic acid binding);GO:0000166(nucleotide binding);GO:0045004(DNA replication proofreading);GO:0006287(base-excision repair, gap-filling);GO:000840…	00230(Purine metabolism);00240(Pyrimidine metabolism);03030(DNA replication);03410(Base excision repair);03420(Nucleotide excision repair);03430(Mismatch repair);03440(Homologous recombination)	OK	18.4922	6.64191	1.47725	up	0.00225	yes
XLOC_017635	XLOC_017635	ENSBTAT00000024550	GCA	chr2:34173683-34193070	ENSBTAG00000018446	GCA	grancalcin, EF-hand calcium binding protein [Source:HGNC Symbol;Acc:HGNC:15990]	GO:0004198(calcium-dependent cysteine-type endopeptidase activity);GO:0006508(proteolysis);GO:0005509(calcium ion binding);GO:0005737(cytoplasm);GO:0042803(protein homodimerization activity);GO:0070062(extracellular vesicular exosome);GO:0046982(protein heterodimerization activity);GO:0005886(plasma membrane)	NA	OK	50.7622	18.1238	1.48587	up	0.00135	yes
XLOC_022246	XLOC_022246	ENSBTAT00000023040	GMNN	chr23:32775580-32786322	ENSBTAG00000017329	GMNN	Bos taurus geminin, DNA replication inhibitor (GMNN), mRNA. [Source:RefSeq mRNA;Acc:NM_001025337]	GO:0070491(repressing transcription factor binding);GO:0006461(protein complex assembly);GO:0009887(organ morphogenesis);GO:0003714(transcription corepressor activity);GO:0045892(negative regulation of transcription, DNA-templated);GO:0005515(protein binding);GO:0005634(nucleus);GO:0042826(histone deacetylase binding);GO:0045786(negative regulation of cell cycle);GO:0008156(negative regulation of…	NA	OK	29.4427	10.5074	1.48651	up	0.0038	yes
XLOC_025386	XLOC_025386	ENSBTAT00000056908	MCM4	chr27:41044070-41049402	ENSBTAG00000017021	MCM4	Bos taurus minichromosome maintenance complex component 4 (MCM4), mRNA. [Source:RefSeq mRNA;Acc:NM_001075158]	GO:0042555(MCM complex);GO:0006270(DNA replication initiation);GO:0003678(DNA helicase activity);GO:0006260(DNA replication);GO:0032508(DNA duplex unwinding);GO:0017111(nucleoside-triphosphatase activity);GO:0016887(ATPase activity);GO:0003677(DNA binding);GO:0005524(ATP binding);GO:0000166(nucleotide binding);GO:0015995(chlorophyll biosynthetic process);GO:0015979(photosynthesis);GO:0016851(magn…	NA	OK	65.4453	23.14	1.4999	up	0.00215	yes
XLOC_018912	XLOC_018912	ENSBTAT00000024287	SLC1A3	chr20:37596573-37679976	ENSBTAG00000018245	SLC1A3	Bos taurus solute carrier family 1 (glial high affinity glutamate transporter), member 3 (SLC1A3), mRNA. [Source:RefSeq mRNA;Acc:NM_174600]	GO:0017153(sodium:dicarboxylate symporter activity);GO:0006835(dicarboxylic acid transport);GO:0043025(neuronal cell body);GO:0042995(cell projection);GO:0015293(symporter activity);GO:0055085(transmembrane transport);GO:0006810(transport);GO:0016021(integral component of membrane);GO:0051938(L-glutamate import);GO:0050806(positive regulation of synaptic transmission);GO:0043205(fibril);GO:003122…	NA	OK	17.0185	6.00147	1.50371	up	0.00405	yes
XLOC_019080	XLOC_019080	-	-	chr20:67939575-67939853	ENSBTAG00000040118	-	Uncharacterized protein [Source:UniProtKB/TrEMBL;Acc:E1BMY6]	GO:0045095(keratin filament);GO:0005882(intermediate filament)	NA	OK	62.5455	21.9623	1.50988	up	0.0257	yes
XLOC_033779	XLOC_033779	-	-	chr6:97616369-97616987	ENSBTAG00000040118	-	Uncharacterized protein [Source:UniProtKB/TrEMBL;Acc:E1BMY6]	GO:0045095(keratin filament);GO:0005882(intermediate filament)	NA	OK	118.728	41.5991	1.51304	up	0.00345	yes
XLOC_006839	XLOC_006839	ENSBTAT00000026619	GINS1	chr13:54063353-54079659	ENSBTAG00000019984	GINS1	Bos taurus GINS complex subunit 1 (Psf1 homolog) (GINS1), mRNA. [Source:RefSeq mRNA;Acc:NM_001083701]	GO:0006260(DNA replication);GO:0005634(nucleus);GO:0001833(inner cell mass cell proliferation);GO:0005515(protein binding);GO:0005737(cytoplasm)	NA	OK	14.5788	5.08457	1.51968	up	0.00265	yes
XLOC_038228	XLOC_038228	ENSBTAT00000000557	TNFAIP3	chr9:76762898-76778776	ENSBTAG00000000436	TNFAIP3	tumor necrosis factor, alpha-induced protein 3 [Source:HGNC Symbol;Acc:HGNC:11896]	GO:0003677(DNA binding);GO:0008270(zinc ion binding);GO:0070433(negative regulation of nucleotide-binding oligomerization domain containing 2 signaling pathway);GO:0070429(negative regulation of nucleotide-binding oligomerization domain containing 1 signaling pathway);GO:0034148(negative regulation of toll-like receptor 5 signaling pathway);GO:0002677(negative regulation of chronic inflammatory r…	04621(NOD-like receptor signaling pathway)	OK	25.8469	8.89089	1.53959	up	0.00195	yes
XLOC_007106	XLOC_007106	ENSBTAT00000027630	CD40	chr13:75563517-75574215	ENSBTAG00000020736	CD40	CD40 molecule, TNF receptor superfamily member 5 [Source:HGNC Symbol;Acc:HGNC:11919]	GO:0005515(protein binding);GO:0035631(CD40 receptor complex);GO:0006874(cellular calcium ion homeostasis);GO:0051607(defense response to virus);GO:0051023(regulation of immunoglobulin secretion);GO:0050776(regulation of immune response);GO:0048304(positive regulation of isotype switching to IgG isotypes);GO:0043491(protein kinase B signaling);GO:0043231(intracellular membrane-bounded organelle);…	04060(Cytokine-cytokine receptor interaction);04514(Cell adhesion molecules (CAMs));04620(Toll-like receptor signaling pathway);04672(Intestinal immune network for IgA production);05144(Malaria);05310(Asthma);05320(Autoimmune thyroid disease);05322(Systemic lupus erythematosus);05330(Allograft rejection);05340(Primary immunodeficiency);05416(Viral myocarditis)	OK	16.1684	5.48365	1.55996	up	0.00635	yes
XLOC_019448	XLOC_019448	-	-	chr21:28220557-28221003	ENSBTAG00000040118	-	Uncharacterized protein [Source:UniProtKB/TrEMBL;Acc:E1BMY6]	GO:0045095(keratin filament);GO:0005882(intermediate filament)	NA	OK	16.637	5.63242	1.56257	up	0.03475	yes
XLOC_026171	XLOC_026171	ENSBTAT00000001254	DNAJC9	chr28:29399879-29456969	ENSBTAG00000000949	DNAJC9	DnaJ (Hsp40) homolog, subfamily C, member 9 [Source:HGNC Symbol;Acc:HGNC:19123]	GO:0035176(social behavior);GO:0005634(nucleus)	NA	OK	16.1154	5.37804	1.58329	up	0.0171	yes
XLOC_010804	XLOC_010804	ENSBTAT00000006978	SRM	chr16:43445562-43449517	ENSBTAG00000005304	SRM	spermidine synthase [Source:HGNC Symbol;Acc:HGNC:11296]	GO:0016740(transferase activity);GO:0008152(metabolic process);GO:0003824(catalytic activity);GO:0004766(spermidine synthase activity);GO:0042803(protein homodimerization activity)	00270(Cysteine and methionine metabolism);00330(Arginine and proline metabolism);00410(beta-Alanine metabolism);00480(Glutathione metabolism)	OK	66.3507	22.002	1.59248	up	0.0016	yes
XLOC_012940	XLOC_012940	-	-	chr18:1853416-1853761	ENSBTAG00000040118	-	Uncharacterized protein [Source:UniProtKB/TrEMBL;Acc:E1BMY6]	GO:0045095(keratin filament);GO:0005882(intermediate filament)	NA	OK	36.9796	12.2334	1.59591	up	0.0214	yes
XLOC_010584	XLOC_010584	ENSBTAT00000027423	TCN1	chr15:84389635-84405106	ENSBTAG00000020580	TCN1	Bos taurus transcobalamin I (vitamin B12 binding protein, R binder family) (TCN1), mRNA. [Source:RefSeq mRNA;Acc:NM_001193105]	GO:0005615(extracellular space);GO:0031419(cobalamin binding);GO:0015889(cobalamin transport)	NA	OK	11.0955	3.6112	1.61942	up	0.0101	yes
XLOC_015409	XLOC_015409	ENSBTAT00000011106	SOCS3	chr19:54458155-54461241	ENSBTAG00000008441	SOCS3	Bos taurus suppressor of cytokine signaling 3 (SOCS3), mRNA. [Source:RefSeq mRNA;Acc:NM_174466]	GO:0040008(regulation of growth);GO:0009968(negative regulation of signal transduction);GO:0043066(negative regulation of apoptotic process);GO:0016567(protein ubiquitination);GO:0035556(intracellular signal transduction);GO:0060708(spongiotrophoblast differentiation);GO:0050728(negative regulation of inflammatory response);GO:0060707(trophoblast giant cell differentiation);GO:0045597(positive re…	04120(Ubiquitin mediated proteolysis);04630(Jak-STAT signaling pathway);04910(Insulin signaling pathway);04920(Adipocytokine signaling pathway);04930(Type II diabetes mellitus)	OK	19.9235	6.4263	1.63241	up	0.01385	yes
XLOC_000938	XLOC_000938	ENSBTAT00000065556	NMNAT3	chr1:130495557-130534913	ENSBTAG00000047216	NMNAT3	nicotinamide nucleotide adenylyltransferase 3 [Source:HGNC Symbol;Acc:HGNC:20989]	GO:0009435(NAD biosynthetic process);GO:0016779(nucleotidyltransferase activity);GO:0009058(biosynthetic process);GO:0003824(catalytic activity);GO:0000309(nicotinamide-nucleotide adenylyltransferase activity);GO:0009611(response to wounding);GO:0005739(mitochondrion);GO:0004515(nicotinate-nucleotide adenylyltransferase activity)	NA	OK	15.0572	4.83377	1.63923	up	0.0235	yes
XLOC_035217	XLOC_035217	ENSBTAT00000060554	GPX3	chr7:64286937-64295116	ENSBTAG00000043553	GPX3	glutathione peroxidase 3 precursor [Source:RefSeq peptide;Acc:NP_776502]	GO:0004602(glutathione peroxidase activity);GO:0004601(peroxidase activity);GO:0006979(response to oxidative stress);GO:0055114(oxidation-reduction process);GO:0016491(oxidoreductase activity);GO:0042744(hydrogen peroxide catabolic process);GO:0051289(protein homotetramerization);GO:0070062(extracellular vesicular exosome);GO:0008430(selenium binding);GO:0005615(extracellular space)	00480(Glutathione metabolism);00590(Arachidonic acid metabolism)	OK	17.0503	5.40409	1.65767	up	0.0037	yes
XLOC_014406	XLOC_014406	-	-	chr18:57037446-57038355	ENSBTAG00000040118	-	Uncharacterized protein [Source:UniProtKB/TrEMBL;Acc:E1BMY6]	GO:0045095(keratin filament);GO:0005882(intermediate filament)	NA	OK	33.5456	10.5884	1.66364	up	0.02155	yes
XLOC_038372	XLOC_038372	ENSBTAT00000008569	SOD2	chr9:97399158-97404522	ENSBTAG00000006523	SOD2	Bos taurus superoxide dismutase 2, mitochondrial (SOD2), mRNA. [Source:RefSeq mRNA;Acc:NM_201527]	GO:0006801(superoxide metabolic process);GO:0004784(superoxide dismutase activity);GO:0005759(mitochondrial matrix);GO:0030145(manganese ion binding);GO:0055114(oxidation-reduction process);GO:0016491(oxidoreductase activity);GO:0005739(mitochondrion);GO:0006357(regulation of transcription from RNA polymerase II promoter);GO:0046872(metal ion binding);GO:0055093(response to hyperoxia);GO:0048773(…	04146(Peroxisome);05016(Huntington's disease)	OK	338.018	106.266	1.66941	up	0.001	yes
XLOC_015414	XLOC_015414	ENSBTAT00000034713	TK1	chr19:54596646-54610033	ENSBTAG00000007121	TK1	Bos taurus thymidine kinase 1, soluble (TK1), mRNA. [Source:RefSeq mRNA;Acc:NM_001097572]	GO:0009157(deoxyribonucleoside monophosphate biosynthetic process);GO:0004797(thymidine kinase activity);GO:0006260(DNA replication);GO:0016310(phosphorylation);GO:0016301(kinase activity);GO:0016740(transferase activity);GO:0046872(metal ion binding);GO:0008270(zinc ion binding);GO:0005737(cytoplasm);GO:0005524(ATP binding);GO:0000166(nucleotide binding);GO:0051289(protein homotetramerization);G…	00240(Pyrimidine metabolism);00983(Drug metabolism - other enzymes)	OK	36.5121	11.4282	1.67578	up	0.0023	yes
XLOC_012751	XLOC_012751	ENSBTAT00000019477;ENSBTAT00000016856	OAS1Y,OAS2	chr17:63611773-63646163	NA	NA	NA	NA	NA	OK	14.6261	4.56794	1.67893	up	0.0027	yes
XLOC_025064	XLOC_025064	-	-	chr26:38128337-38128582	ENSBTAG00000040118	-	Uncharacterized protein [Source:UniProtKB/TrEMBL;Acc:E1BMY6]	GO:0045095(keratin filament);GO:0005882(intermediate filament)	NA	OK	47.9958	14.9489	1.68286	up	0.0405	yes
XLOC_038882	XLOC_038882	-	-	chr9:97390464-97393766	ENSBTAG00000040118	-	Uncharacterized protein [Source:UniProtKB/TrEMBL;Acc:E1BMY6]	GO:0045095(keratin filament);GO:0005882(intermediate filament)	NA	OK	98.8369	30.3408	1.70379	up	0.00045	yes
XLOC_021286	XLOC_021286	ENSBTAT00000019121	MCM2	chr22:60565095-60581052	ENSBTAG00000014380	MCM2	minichromosome maintenance complex component 2 [Source:HGNC Symbol;Acc:HGNC:6944]	GO:0042555(MCM complex);GO:0006270(DNA replication initiation);GO:0003678(DNA helicase activity);GO:0006260(DNA replication);GO:0016887(ATPase activity);GO:0003677(DNA binding);GO:0005634(nucleus);GO:0005524(ATP binding);GO:0000166(nucleotide binding);GO:0003688(DNA replication origin binding);GO:0006268(DNA unwinding involved in DNA replication);GO:0071353(cellular response to interleukin-4);GO:…	03030(DNA replication);04110(Cell cycle)	OK	98.5145	29.7589	1.72702	up	0.0004	yes
XLOC_031091	XLOC_031091	ENSBTAT00000024996	RND1	chr5:31090624-31097555	ENSBTAG00000018773	RND1	Bos taurus Rho family GTPase 1 (RND1), mRNA. [Source:RefSeq mRNA;Acc:NM_001046016]	GO:0006184(GTP catabolic process);GO:0007264(small GTPase mediated signal transduction);GO:0005525(GTP binding);GO:0007165(signal transduction);GO:0005622(intracellular);GO:0005856(cytoskeleton);GO:0015031(protein transport);GO:0005886(plasma membrane);GO:0005737(cytoplasm);GO:0000166(nucleotide binding);GO:0016020(membrane);GO:0016322(neuron remodeling);GO:0007162(negative regulation of cell adh…	04360(Axon guidance)	OK	12.9844	3.74308	1.79449	up	0.00285	yes
XLOC_005323	XLOC_005323	ENSBTAT00000010802	RRM2	chr11:87466580-87473890	ENSBTAG00000008216	RRM2	ribonucleotide reductase M2 [Source:HGNC Symbol;Acc:HGNC:10452]	GO:0055114(oxidation-reduction process);GO:0016491(oxidoreductase activity);GO:0009262(deoxyribonucleotide metabolic process);GO:0009263(deoxyribonucleotide biosynthetic process);GO:0004748(ribonucleoside-diphosphate reductase activity, thioredoxin disulfide as acceptor);GO:0051290(protein heterotetramerization);GO:0051259(protein oligomerization);GO:0005515(protein binding);GO:0005737(cytoplasm)…	00230(Purine metabolism);00240(Pyrimidine metabolism);00480(Glutathione metabolism);04115(p53 signaling pathway)	OK	53.098	15.2487	1.79997	up	0.0001	yes
XLOC_034026	XLOC_034026	ENSBTAT00000006929;ENSBTAT00000047589	SPP1	chr6:38120577-38127577	ENSBTAG00000005260	SPP1	Bos taurus secreted phosphoprotein 1 (SPP1), mRNA. [Source:RefSeq mRNA;Acc:NM_174187]	GO:0001503(ossification);GO:0007155(cell adhesion);GO:0050840(extracellular matrix binding);GO:0010811(positive regulation of cell-substrate adhesion);GO:0030593(neutrophil chemotaxis);GO:0045177(apical part of cell);GO:0005737(cytoplasm);GO:0033280(response to vitamin D);GO:0070062(extracellular vesicular exosome);GO:0005515(protein binding);GO:0005615(extracellular space)	04510(Focal adhesion);04512(ECM-receptor interaction);04620(Toll-like receptor signaling pathway)	OK	513.959	147.293	1.80297	up	5e-05	yes
XLOC_012113	XLOC_012113	ENSBTAT00000009882	POLE	chr17:45511663-45572792	ENSBTAG00000000590	POLE	polymerase (DNA directed), epsilon, catalytic subunit [Source:HGNC Symbol;Acc:HGNC:9177]	GO:0003887(DNA-directed DNA polymerase activity);GO:0006261(DNA-dependent DNA replication);GO:0006260(DNA replication);GO:0006139(nucleobase-containing compound metabolic process);GO:0016779(nucleotidyltransferase activity);GO:0003677(DNA binding);GO:0016740(transferase activity);GO:0008270(zinc ion binding);GO:0005634(nucleus);GO:0003676(nucleic acid binding);GO:0000166(nucleotide binding);GO:00…	00230(Purine metabolism);00240(Pyrimidine metabolism);03030(DNA replication);03410(Base excision repair);03420(Nucleotide excision repair)	OK	10.7151	3.06781	1.80436	up	0.0003	yes
XLOC_009470	XLOC_009470	ENSBTAT00000052678	P2RY2	chr15:53484172-53499485	ENSBTAG00000039050	P2RY2	purinergic receptor P2Y, G-protein coupled, 2 [Source:HGNC Symbol;Acc:HGNC:8541]	GO:0045028(G-protein coupled purinergic nucleotide receptor activity);GO:0035589(G-protein coupled purinergic nucleotide receptor signaling pathway);GO:0007186(G-protein coupled receptor signaling pathway);GO:0007165(signal transduction);GO:0004930(G-protein coupled receptor activity);GO:0004871(signal transducer activity);GO:0016021(integral component of membrane);GO:0070257(positive regulation …	04080(Neuroactive ligand-receptor interaction)	OK	31.7399	8.9807	1.8214	up	0.00025	yes
XLOC_034511	XLOC_034511	ENSBTAT00000047333	HICE1	chr7:5913698-5938835	ENSBTAG00000007366	HICE1	Bos taurus HAUS augmin-like complex, subunit 8 (HAUS8), mRNA. [Source:RefSeq mRNA;Acc:NM_001075487]	GO:0070652(HAUS complex);GO:0051225(spindle assembly);GO:0051297(centrosome organization);GO:0005813(centrosome)	NA	OK	13.1912	3.68476	1.83993	up	0.0021	yes
XLOC_033778	XLOC_033778	-	-	chr6:97613249-97614366	ENSBTAG00000040118	-	Uncharacterized protein [Source:UniProtKB/TrEMBL;Acc:E1BMY6]	GO:0045095(keratin filament);GO:0005882(intermediate filament)	NA	OK	168.703	47.078	1.84136	up	0.00035	yes
XLOC_035078	XLOC_035078	-	-	chr7:52215342-52215793	ENSBTAG00000040118	-	Uncharacterized protein [Source:UniProtKB/TrEMBL;Acc:E1BMY6]	GO:0045095(keratin filament);GO:0005882(intermediate filament)	NA	OK	23.0244	6.34687	1.85905	up	0.01035	yes
XLOC_020150	XLOC_020150	ENSBTAT00000022183	BIKBA	chr21:46065548-46068942	ENSBTAG00000016683	BIKBA	Bos taurus nuclear factor of kappa light polypeptide gene enhancer in B-cells inhibitor, alpha (NFKBIA), mRNA. [Source:RefSeq mRNA;Acc:NM_001045868]	GO:0005515(protein binding);GO:0042127(regulation of cell proliferation);GO:0043330(response to exogenous dsRNA);GO:0031625(ubiquitin protein ligase binding);GO:0005634(nucleus);GO:0005737(cytoplasm);GO:0070431(nucleotide-binding oligomerization domain containing 2 signaling pathway);GO:0070427(nucleotide-binding oligomerization domain containing 1 signaling pathway);GO:0000060(protein import int…	04062(Chemokine signaling pathway);04210(Apoptosis);04620(Toll-like receptor signaling pathway);04621(NOD-like receptor signaling pathway);04622(RIG-I-like receptor signaling pathway);04623(Cytosolic DNA-sensing pathway);04660(T cell receptor signaling pathway);04662(B cell receptor signaling pathway);04722(Neurotrophin signaling pathway);04920(Adipocytokine signaling pathway);05140(Leishmaniasis…	OK	116.6	31.5496	1.88587	up	0.0002	yes
XLOC_033699	XLOC_033699	ENSBTAT00000045994	CXCL3	chr6:90811061-90813079	ENSBTAG00000037778	CXCL3	Bos taurus chemokine (C-X-C motif) ligand 3 (CXCL3), mRNA. [Source:RefSeq mRNA;Acc:NM_001046513]	GO:0008009(chemokine activity);GO:0060326(cell chemotaxis);GO:0005125(cytokine activity);GO:0005615(extracellular space);GO:0005576(extracellular region);GO:0006955(immune response)	04062(Chemokine signaling pathway)	OK	48.8887	13.1734	1.89187	up	0.0006	yes
XLOC_011687	XLOC_011687	ENSBTAT00000019573	ISG15	chr16:52714626-52715665	ENSBTAG00000014707	ISG15	Bos taurus ISG15 ubiquitin-like modifier (ISG15), mRNA. [Source:RefSeq mRNA;Acc:NM_174366]	GO:0005515(protein binding);GO:0031397(negative regulation of protein ubiquitination);GO:0042742(defense response to bacterium);GO:0051607(defense response to virus);GO:0005737(cytoplasm);GO:0031386(protein tag);GO:0045648(positive regulation of erythrocyte differentiation);GO:0032020(ISG15-protein conjugation);GO:0019941(modification-dependent protein catabolic process);GO:0034340(response to ty…	04622(RIG-I-like receptor signaling pathway)	OK	10.0363	2.69323	1.89782	up	0.0176	yes
XLOC_013141	XLOC_013141	ENSBTAT00000034627	CX3CL1	chr18:25464212-25475151	ENSBTAG00000024869	CX3CL1	chemokine (C-X3-C motif) ligand 1 [Source:HGNC Symbol;Acc:HGNC:10647]	GO:0008009(chemokine activity);GO:0048247(lymphocyte chemotaxis);GO:0048246(macrophage chemotaxis);GO:0032914(positive regulation of transforming growth factor beta1 production);GO:2001240(negative regulation of extrinsic apoptotic signaling pathway in absence of ligand);GO:0045766(positive regulation of angiogenesis);GO:0060055(angiogenesis involved in wound healing);GO:0030593(neutrophil chemot…	NA	OK	15.2036	4.07182	1.90067	up	0.0008	yes
XLOC_033777	XLOC_033777	ENSBTAT00000023468	BMP3	chr6:97585015-97613064	ENSBTAG00000017642	BMP3	Bos taurus bone morphogenetic protein 3 (BMP3), mRNA. [Source:RefSeq mRNA;Acc:NM_001192268]	GO:0051216(cartilage development);GO:0001503(ossification);GO:0040007(growth);GO:0005125(cytokine activity);GO:0005615(extracellular space);GO:0008083(growth factor activity);GO:0030154(cell differentiation);GO:0007275(multicellular organismal development);GO:0045944(positive regulation of transcription from RNA polymerase II promoter);GO:0005576(extracellular region);GO:0070700(BMP receptor bind…	NA	OK	167.554	44.7828	1.90361	up	5e-05	yes
XLOC_014056	XLOC_014056	ENSBTAT00000046456	MT1E	chr18:24112350-24114381	ENSBTAG00000001595	MT1E	Bos taurus metallothionein 1E (MT1E), mRNA. [Source:RefSeq mRNA;Acc:NM_001114857]	GO:0046872(metal ion binding)	NA	OK	15.1689	4.05176	1.90449	up	0.03265	yes
XLOC_026601	XLOC_026601	ENSBTAT00000045520;ENSBTAT00000015221	POLA2	chr29:44143170-44170094	ENSBTAG00000011455	POLA2	polymerase (DNA directed), alpha 2, accessory subunit [Source:HGNC Symbol;Acc:HGNC:30073]	GO:0003887(DNA-directed DNA polymerase activity);GO:0006261(DNA-dependent DNA replication);GO:0006260(DNA replication);GO:0003677(DNA binding);GO:0005634(nucleus);GO:0006270(DNA replication initiation);GO:0046982(protein heterodimerization activity);GO:0005658(alpha DNA polymerase:primase complex);GO:0000060(protein import into nucleus, translocation);GO:0005515(protein binding);GO:0005654(nucleo…	00230(Purine metabolism);00230(Purine metabolism);00240(Pyrimidine metabolism);00240(Pyrimidine metabolism);03030(DNA replication);03030(DNA replication)	OK	19.9348	5.26574	1.92058	up	0.0001	yes
XLOC_031534	XLOC_031534	ENSBTAT00000020715	MCM5	chr5:73990686-74009154	ENSBTAG00000015595	MCM5	Bos taurus minichromosome maintenance complex component 5 (MCM5), mRNA. [Source:RefSeq mRNA;Acc:NM_001075290]	GO:0042555(MCM complex);GO:0006270(DNA replication initiation);GO:0003678(DNA helicase activity);GO:0006260(DNA replication);GO:0032508(DNA duplex unwinding);GO:0003677(DNA binding);GO:0004386(helicase activity);GO:0016787(hydrolase activity);GO:0005634(nucleus);GO:0005524(ATP binding);GO:0000166(nucleotide binding);GO:0005654(nucleoplasm);GO:0005515(protein binding);GO:0016020(membrane)	03030(DNA replication);04110(Cell cycle)	OK	74.9742	19.7753	1.92269	up	5e-05	yes
XLOC_037847	XLOC_037847	-	-	chr8:104337182-104337609	ENSBTAG00000040118	-	Uncharacterized protein [Source:UniProtKB/TrEMBL;Acc:E1BMY6]	GO:0045095(keratin filament);GO:0005882(intermediate filament)	NA	OK	14.328	3.77631	1.92379	up	0.02145	yes
XLOC_022824	XLOC_022824	ENSBTAT00000006297	GRP	chr24:58710083-58722860	ENSBTAG00000004796	GRP	Bos taurus gastrin-releasing peptide (GRP), mRNA. [Source:RefSeq mRNA;Acc:NM_001101239]	GO:0048565(digestive tract development);GO:0007218(neuropeptide signaling pathway);GO:0005576(extracellular region);GO:0005184(neuropeptide hormone activity);GO:0005615(extracellular space)	NA	OK	143.537	37.1158	1.95132	up	0.00025	yes
XLOC_035751	XLOC_035751	ENSBTAT00000010763	CHAF1A	chr7:20893507-20918558	ENSBTAG00000008181	CHAF1A	Bos taurus chromatin assembly factor 1, subunit A (p150) (CHAF1A), mRNA. [Source:RefSeq mRNA;Acc:NM_001101842]	GO:0033186(CAF-1 complex);GO:0031497(chromatin assembly);GO:0006260(DNA replication);GO:0006974(cellular response to DNA damage stimulus);GO:0006281(DNA repair);GO:0007049(cell cycle);GO:0006351(transcription, DNA-templated);GO:0006355(regulation of transcription, DNA-templated);GO:0005634(nucleus);GO:0005515(protein binding);GO:0070087(chromo shadow domain binding);GO:0006335(DNA replication-dep…	NA	OK	16.5612	4.26217	1.95815	up	0.0002	yes
XLOC_007966	XLOC_007966	ENSBTAT00000054380	ENSBTAG00000046325	chr14:21164723-21192690	ENSBTAG00000046325	-	Uncharacterized protein [Source:UniProtKB/TrEMBL;Acc:E1BFZ9]	GO:0006334(nucleosome assembly);GO:0005634(nucleus)	NA	OK	42.3335	10.7855	1.97271	up	5e-05	yes
XLOC_033700	XLOC_033700	ENSBTAT00000065665;ENSBTAT00000022366	GRO1	chr6:90822747-90824841	ENSBTAG00000037558	GRO1	Bos taurus chemokine (C-X-C motif) ligand 1 (melanoma growth stimulating activity, alpha) (GRO1), mRNA. [Source:RefSeq mRNA;Acc:NM_175700]	GO:0008009(chemokine activity);GO:0060326(cell chemotaxis);GO:0005125(cytokine activity);GO:0005615(extracellular space);GO:0008083(growth factor activity);GO:0006954(inflammatory response);GO:0005576(extracellular region);GO:0006955(immune response)	04062(Chemokine signaling pathway)	OK	27.9336	6.67762	2.0646	up	0.00065	yes
XLOC_017573	XLOC_017573	ENSBTAT00000004495	CDCA7	chr2:23377567-23390741	ENSBTAG00000003458	CDCA7	Bos taurus cell division cycle associated 7 (CDCA7), mRNA. [Source:RefSeq mRNA;Acc:NM_001037488]	GO:0006915(apoptotic process);GO:0006351(transcription, DNA-templated);GO:0006355(regulation of transcription, DNA-templated);GO:0005634(nucleus);GO:0005737(cytoplasm);GO:0042127(regulation of cell proliferation);GO:0005654(nucleoplasm)	NA	OK	41.1789	9.76145	2.07674	up	5e-05	yes
XLOC_000524	XLOC_000524	ENSBTAT00000017476	CLDN1	chr1:77596385-77612605	ENSBTAG00000013148	CLDN1	Bos taurus claudin 1 (CLDN1), mRNA. [Source:RefSeq mRNA;Acc:NM_001001854]	GO:0005923(tight junction);GO:0030054(cell junction);GO:0005887(integral component of plasma membrane);GO:0005886(plasma membrane);GO:0005198(structural molecule activity);GO:0016021(integral component of membrane);GO:0016338(calcium-independent cell-cell adhesion via plasma membrane cell-adhesion molecules);GO:0016328(lateral plasma membrane);GO:0016324(apical plasma membrane);GO:0061436(establi…	04514(Cell adhesion molecules (CAMs));04530(Tight junction);04670(Leukocyte transendothelial migration)	OK	19.4771	4.55169	2.09731	up	0.00045	yes
XLOC_035746	XLOC_035746	ENSBTAT00000044908	UHRF1	chr7:20436669-20470587	ENSBTAG00000002224	UHRF1	Bos taurus ubiquitin-like with PHD and ring finger domains 1 (UHRF1), mRNA. [Source:RefSeq mRNA;Acc:NM_001103098]	GO:0051865(protein autoubiquitination);GO:0044729(hemi-methylated DNA-binding);GO:0016574(histone ubiquitination);GO:0010216(maintenance of DNA methylation);GO:0005657(replication fork);GO:0000792(heterochromatin);GO:0000791(euchromatin);GO:0000790(nuclear chromatin);GO:0005515(protein binding);GO:0035064(methylated histone binding);GO:0042787(protein ubiquitination involved in ubiquitin-dependen…	NA	OK	23.0712	5.25759	2.13362	up	5e-05	yes
XLOC_022047	XLOC_022047	ENSBTAT00000014194	MCM3	chr23:24438944-24456316	ENSBTAG00000010721	MCM3	Bos taurus minichromosome maintenance complex component 3 (MCM3), mRNA. [Source:RefSeq mRNA;Acc:NM_001013586]	GO:0042555(MCM complex);GO:0006270(DNA replication initiation);GO:0003678(DNA helicase activity);GO:0006260(DNA replication);GO:0032508(DNA duplex unwinding);GO:0017111(nucleoside-triphosphatase activity);GO:0003677(DNA binding);GO:0004386(helicase activity);GO:0016787(hydrolase activity);GO:0005634(nucleus);GO:0005524(ATP binding);GO:0000166(nucleotide binding);GO:0005737(cytoplasm);GO:0005654(n…	03030(DNA replication);04110(Cell cycle)	OK	72.0867	15.4082	2.22603	up	5e-05	yes
XLOC_025890	XLOC_025890	-	-	chr28:26963011-26963318	ENSBTAG00000040118	-	Uncharacterized protein [Source:UniProtKB/TrEMBL;Acc:E1BMY6]	GO:0045095(keratin filament);GO:0005882(intermediate filament)	NA	OK	25.519	5.18796	2.29833	up	0.0178	yes
XLOC_007436	XLOC_007436	ENSBTAT00000006432	TGM3	chr13:53261630-53304213	ENSBTAG00000001785	TGM3	Bos taurus transglutaminase 3 (E polypeptide, protein-glutamine-gamma-glutamyltransferase) (TGM3), mRNA. [Source:RefSeq mRNA;Acc:NM_001101848]	GO:0018149(peptide cross-linking);GO:0003810(protein-glutamine gamma-glutamyltransferase activity);GO:0046872(metal ion binding);GO:0043163(cell envelope organization);GO:0030216(keratinocyte differentiation);GO:0070062(extracellular vesicular exosome);GO:0031234(extrinsic component of cytoplasmic side of plasma membrane);GO:0051262(protein tetramerization);GO:0003824(catalytic activity);GO:00057…	NA	OK	34.455	6.80722	2.33958	up	5e-05	yes
XLOC_007651	XLOC_007651	ENSBTAT00000006947	ADA	chr13:73750478-73774021	ENSBTAG00000005280	ADA	Bos taurus adenosine deaminase (ADA), mRNA. [Source:RefSeq mRNA;Acc:NM_173887]	GO:0019239(deaminase activity);GO:0009168(purine ribonucleoside monophosphate biosynthetic process);GO:0004000(adenosine deaminase activity);GO:0070256(negative regulation of mucus secretion);GO:0060407(negative regulation of penile erection);GO:0050862(positive regulation of T cell receptor signaling pathway);GO:0046111(xanthine biosynthetic process);GO:0046103(inosine biosynthetic process);GO:0…	00230(Purine metabolism);05340(Primary immunodeficiency)	OK	30.9657	6.08307	2.3478	up	0.00015	yes
XLOC_011848	XLOC_011848	ENSBTAT00000024147	DTL	chr16:73313696-73364159	ENSBTAG00000018142	DTL	denticleless E3 ubiquitin protein ligase homolog (Drosophila) [Source:HGNC Symbol;Acc:HGNC:30288]	GO:0005515(protein binding);GO:0031465(Cul4B-RING E3 ubiquitin ligase complex);GO:0031464(Cul4A-RING E3 ubiquitin ligase complex);GO:0019985(translesion synthesis);GO:0006513(protein monoubiquitination);GO:0031572(G2 DNA damage checkpoint);GO:0009411(response to UV);GO:0005654(nucleoplasm);GO:0043231(intracellular membrane-bounded organelle);GO:0006974(cellular response to DNA damage stimulus);GO…	NA	OK	11.8064	2.30229	2.35843	up	0.0001	yes
XLOC_033695	XLOC_033695	ENSBTAT00000012939	CXCL6	chr6:90645963-90648076	ENSBTAG00000009812	CXCL6	Bos taurus chemokine (C-X-C motif) ligand 6 (granulocyte chemotactic protein 2) (CXCL6), mRNA. [Source:RefSeq mRNA;Acc:NM_174300]	GO:0008201(heparin binding);GO:0008009(chemokine activity);GO:0060326(cell chemotaxis);GO:0005125(cytokine activity);GO:0005615(extracellular space);GO:0042742(defense response to bacterium);GO:0006935(chemotaxis);GO:0070951(regulation of neutrophil mediated killing of gram-negative bacterium);GO:0001776(leukocyte homeostasis);GO:0032496(response to lipopolysaccharide);GO:0032642(regulation of ch…	04062(Chemokine signaling pathway)	OK	1078.01	178.074	2.59782	up	5e-05	yes
XLOC_028111	XLOC_028111	ENSBTAT00000003523	ORC1	chr3:94543847-94578777	ENSBTAG00000002719	ORC1	Bos taurus origin recognition complex, subunit 1 (ORC1), mRNA. [Source:RefSeq mRNA;Acc:NM_001014918]	GO:0005664(nuclear origin of replication recognition complex);GO:0006260(DNA replication);GO:0017111(nucleoside-triphosphatase activity);GO:0003682(chromatin binding);GO:0003677(DNA binding);GO:0005634(nucleus);GO:0005524(ATP binding);GO:0000166(nucleotide binding);GO:0008152(metabolic process);GO:0000808(origin recognition complex);GO:0005515(protein binding);GO:0005730(nucleolus);GO:0005886(pla…	04110(Cell cycle)	OK	10.7346	1.35055	2.99065	up	5e-05	yes
XLOC_026981	XLOC_026981	ENSBTAT00000030328	SAA3	chr29:26668046-26671801	ENSBTAG00000022396	SAA3	Bos taurus serum amyloid A 3 (SAA3), mRNA. [Source:RefSeq mRNA;Acc:NM_181016]	GO:0006953(acute-phase response);GO:0005576(extracellular region);GO:0034364(high-density lipoprotein particle)	NA	OK	127.475	12.3611	3.36634	up	5e-05	yes
XLOC_015182	XLOC_015182	ENSBTAT00000013706	CDC6	chr19:41185974-41196948	ENSBTAG00000010384	CDC6	cell division cycle 6 [Source:HGNC Symbol;Acc:HGNC:1744]	GO:0017111(nucleoside-triphosphatase activity);GO:0008152(metabolic process);GO:0005524(ATP binding);GO:0000166(nucleotide binding);GO:0005819(spindle);GO:0003682(chromatin binding);GO:0005737(cytoplasm);GO:0051984(positive regulation of chromosome segregation);GO:0051233(spindle midzone);GO:0032467(positive regulation of cytokinesis);GO:0030071(regulation of mitotic metaphase/anaphase transition…	04110(Cell cycle)	OK	12.4734	1.09462	3.51035	up	5e-05	yes
XLOC_002192	XLOC_002192	-	-	chr10:17933380-17982137	ENSBTAG00000040118	-	Uncharacterized protein [Source:UniProtKB/TrEMBL;Acc:E1BMY6]	GO:0045095(keratin filament);GO:0005882(intermediate filament)	NA	OK	18.4659	0.842631	4.45382	up	0.0138	yes
XLOC_014058	XLOC_014058	ENSBTAT00000034373	MT2	chr18:24125365-24126717	ENSBTAG00000023659	MT2	Bos taurus metallothionein 2A (MT2A), mRNA. [Source:RefSeq mRNA;Acc:NM_001075140]	GO:0048471(perinuclear region of cytoplasm);GO:0046872(metal ion binding);GO:0008270(zinc ion binding);GO:0005634(nucleus);GO:0005737(cytoplasm);GO:0071294(cellular response to zinc ion);GO:0045926(negative regulation of growth)	NA	OK	803.355	31.9998	4.6499	up	5e-05	yes
XLOC_033604	XLOC_033604	ENSBTAT00000064646	bta-mir-4449	chr6:70048261-70048796	ENSBTAG00000045496	bta-mir-4449	bta-mir-4449 [Source:miRBase;Acc:MI0031502]	NA	NA	OK	10.6782	0	inf	up	0.00345	yes
XLOC_008415	XLOC_008415	-	-	chr14:13515505-13515737	ENSBTAG00000040118	-	Uncharacterized protein [Source:UniProtKB/TrEMBL;Acc:E1BMY6]	GO:0045095(keratin filament);GO:0005882(intermediate filament)	NA	OK	11.2881	0	inf	up	0.00135	yes
XLOC_003652	XLOC_003652	-	-	chr10:65035379-65035609	ENSBTAG00000040118	-	Uncharacterized protein [Source:UniProtKB/TrEMBL;Acc:E1BMY6]	GO:0045095(keratin filament);GO:0005882(intermediate filament)	NA	OK	12.8484	0	inf	up	0.00075	yes
XLOC_001931	XLOC_001931	-	-	chr1:148854105-148854296	ENSBTAG00000040118	-	Uncharacterized protein [Source:UniProtKB/TrEMBL;Acc:E1BMY6]	GO:0045095(keratin filament);GO:0005882(intermediate filament)	NA	OK	13.1234	0	inf	up	0.0282	yes
XLOC_033214	XLOC_033214	-	-	chr5:116382603-116382830	ENSBTAG00000040118	-	Uncharacterized protein [Source:UniProtKB/TrEMBL;Acc:E1BMY6]	GO:0045095(keratin filament);GO:0005882(intermediate filament)	NA	OK	13.872	0	inf	up	0.00355	yes
XLOC_016427	XLOC_016427	-	-	chr19:49490912-49491115	ENSBTAG00000040118	-	Uncharacterized protein [Source:UniProtKB/TrEMBL;Acc:E1BMY6]	GO:0045095(keratin filament);GO:0005882(intermediate filament)	NA	OK	14.8139	0	inf	up	0.00555	yes
XLOC_000709	XLOC_000709	-	-	chr1:98652417-98652621	ENSBTAG00000040118	-	Uncharacterized protein [Source:UniProtKB/TrEMBL;Acc:E1BMY6]	GO:0045095(keratin filament);GO:0005882(intermediate filament)	NA	OK	17.3515	0	inf	up	0.00555	yes
XLOC_024444	XLOC_024444	-	-	chr26:12830399-12830595	ENSBTAG00000040118	-	Uncharacterized protein [Source:UniProtKB/TrEMBL;Acc:E1BMY6]	GO:0045095(keratin filament);GO:0005882(intermediate filament)	NA	OK	19.4796	0	inf	up	0.00355	yes
XLOC_017964	XLOC_017964	-	-	chr2:114821300-114821494	ENSBTAG00000040118	-	Uncharacterized protein [Source:UniProtKB/TrEMBL;Acc:E1BMY6]	GO:0045095(keratin filament);GO:0005882(intermediate filament)	NA	OK	20.4055	0	inf	up	0.00355	yes
XLOC_008713	XLOC_008713	-	-	chr14:46332970-46333165	ENSBTAG00000040118	-	Uncharacterized protein [Source:UniProtKB/TrEMBL;Acc:E1BMY6]	GO:0045095(keratin filament);GO:0005882(intermediate filament)	NA	OK	20.9218	0	inf	up	0.007	yes
XLOC_035307	XLOC_035307	-	-	chr7:82790729-82790923	ENSBTAG00000040118	-	Uncharacterized protein [Source:UniProtKB/TrEMBL;Acc:E1BMY6]	GO:0045095(keratin filament);GO:0005882(intermediate filament)	NA	OK	21.2292	0	inf	up	0.00355	yes
XLOC_001589	XLOC_001589	-	-	chr1:96215030-96215214	ENSBTAG00000040118	-	Uncharacterized protein [Source:UniProtKB/TrEMBL;Acc:E1BMY6]	GO:0045095(keratin filament);GO:0005882(intermediate filament)	NA	OK	24.4681	0	inf	up	0.007	yes
XLOC_036389	XLOC_036389	-	-	chr8:5477586-5477766	ENSBTAG00000040118	-	Uncharacterized protein [Source:UniProtKB/TrEMBL;Acc:E1BMY6]	GO:0045095(keratin filament);GO:0005882(intermediate filament)	NA	OK	26.5093	0	inf	up	0.007	yes
XLOC_016599	XLOC_016599	-	-	chr19:61278980-61279164	ENSBTAG00000040118	-	Uncharacterized protein [Source:UniProtKB/TrEMBL;Acc:E1BMY6]	GO:0045095(keratin filament);GO:0005882(intermediate filament)	NA	OK	26.6644	0	inf	up	0.00555	yes
XLOC_026898	XLOC_026898	-	-	chr29:12650890-12651063	ENSBTAG00000040118	-	Uncharacterized protein [Source:UniProtKB/TrEMBL;Acc:E1BMY6]	GO:0045095(keratin filament);GO:0005882(intermediate filament)	NA	OK	27.7236	0	inf	up	0.0124	yes
XLOC_011133	XLOC_011133	-	-	chr16:70814526-70814709	ENSBTAG00000040118	-	Uncharacterized protein [Source:UniProtKB/TrEMBL;Acc:E1BMY6]	GO:0045095(keratin filament);GO:0005882(intermediate filament)	NA	OK	32.2712	0	inf	up	0.00555	yes
XLOC_000287	XLOC_000287	-	-	chr1:56935250-56935457	ENSBTAG00000040118	-	Uncharacterized protein [Source:UniProtKB/TrEMBL;Acc:E1BMY6]	GO:0045095(keratin filament);GO:0005882(intermediate filament)	NA	OK	33.2652	0	inf	up	0.0002	yes
XLOC_017809	XLOC_017809	-	-	chr2:88457509-88457695	ENSBTAG00000040118	-	Uncharacterized protein [Source:UniProtKB/TrEMBL;Acc:E1BMY6]	GO:0045095(keratin filament);GO:0005882(intermediate filament)	NA	OK	44.1827	0	inf	up	0.00075	yes
XLOC_038888	XLOC_038888	ENSBTAT00000060209	SNORA29	chr9:97466404-97492748	ENSBTAG00000043217	SNORA29	Small nucleolar RNA SNORA29 [Source:RFAM;Acc:RF00429]	NA	NA	OK	45.2218	0	inf	up	0.02615	yes
XLOC_017280	XLOC_017280	-	-	chr2:124953875-124954052	ENSBTAG00000040118	-	Uncharacterized protein [Source:UniProtKB/TrEMBL;Acc:E1BMY6]	GO:0045095(keratin filament);GO:0005882(intermediate filament)	NA	OK	45.9505	0	inf	up	0.00555	yes
XLOC_030394	XLOC_030394	-	-	chr4:46462544-46462759	ENSBTAG00000040118	-	Uncharacterized protein [Source:UniProtKB/TrEMBL;Acc:E1BMY6]	GO:0045095(keratin filament);GO:0005882(intermediate filament)	NA	OK	50.6836	0	inf	up	5e-05	yes
XLOC_009472	XLOC_009472	-	-	chr15:53504401-53504597	ENSBTAG00000040118	-	Uncharacterized protein [Source:UniProtKB/TrEMBL;Acc:E1BMY6]	GO:0045095(keratin filament);GO:0005882(intermediate filament)	NA	OK	51.0774	0	inf	up	0.0004	yes
XLOC_008303	XLOC_008303	-	-	chr14:1359869-1360037	ENSBTAG00000040118	-	Uncharacterized protein [Source:UniProtKB/TrEMBL;Acc:E1BMY6]	GO:0045095(keratin filament);GO:0005882(intermediate filament)	NA	OK	54.1953	0	inf	up	0.00555	yes
XLOC_017754	XLOC_017754	-	-	chr2:72647704-72647866	ENSBTAG00000040118	-	Uncharacterized protein [Source:UniProtKB/TrEMBL;Acc:E1BMY6]	GO:0045095(keratin filament);GO:0005882(intermediate filament)	NA	OK	54.9778	0	inf	up	0.0124	yes
XLOC_036941	XLOC_036941	-	-	chr8:71170579-71170744	ENSBTAG00000040118	-	Uncharacterized protein [Source:UniProtKB/TrEMBL;Acc:E1BMY6]	GO:0045095(keratin filament);GO:0005882(intermediate filament)	NA	OK	56.4263	0	inf	up	0.00355	yes
XLOC_038449	XLOC_038449	-	-	chr9:10749185-10749333	ENSBTAG00000040118	-	Uncharacterized protein [Source:UniProtKB/TrEMBL;Acc:E1BMY6]	GO:0045095(keratin filament);GO:0005882(intermediate filament)	NA	OK	84.6427	0	inf	up	0.04785	yes
XLOC_011447	XLOC_011447	-	-	chr16:28093346-28093496	ENSBTAG00000040118	-	Uncharacterized protein [Source:UniProtKB/TrEMBL;Acc:E1BMY6]	GO:0045095(keratin filament);GO:0005882(intermediate filament)	NA	OK	159.627	0	inf	up	0.00355	yes
XLOC_025096	XLOC_025096	ENSBTAT00000060633	SNORA19	chr26:39584512-39616230	ENSBTAG00000043816	SNORA19	Small nucleolar RNA SNORA19 [Source:RFAM;Acc:RF00413]	NA	NA	OK	189.017	0	inf	up	0.02535	yes
XLOC_010766	XLOC_010766	ENSBTAT00000059118	SNORA66	chr16:37567638-37838172	ENSBTAG00000042434	SNORA66	Small nucleolar RNA SNORA66 [Source:RFAM;Acc:RF00155]	NA	NA	OK	0	204.188	-inf	down	0.0217	yes
XLOC_023796	XLOC_023796	ENSBTAT00000059680	SNORA64	chr25:1520492-1522670	ENSBTAG00000042688	SNORA64	Small nucleolar RNA SNORA64/SNORA10 family [Source:RFAM;Acc:RF00264]	NA	NA	OK	0	141.067	-inf	down	0.00285	yes
XLOC_039162	XLOC_039162	ENSBTAT00000059485	SNORA70	chrX:40364801-40367164	ENSBTAG00000042321	SNORA70	Small nucleolar RNA SNORA70 [Source:RFAM;Acc:RF00156]	NA	NA	OK	0	114.885	-inf	down	0.01995	yes
XLOC_017110	XLOC_017110	ENSBTAT00000059872	SNORA42	chr2:106978525-107006143	ENSBTAG00000047431	SNORA42	Small nucleolar RNA SNORA42/SNORA80 family [Source:RFAM;Acc:RF00406]	NA	NA	OK	0	89.7527	-inf	down	0.0326	yes
XLOC_033535	XLOC_033535	-	-	chr6:59885858-59886070	ENSBTAG00000040118	-	Uncharacterized protein [Source:UniProtKB/TrEMBL;Acc:E1BMY6]	GO:0045095(keratin filament);GO:0005882(intermediate filament)	NA	OK	0	16.3847	-inf	down	0.00115	yes

## Sheet: 12h vs 0h differential mRNAs
Supplementary Table 2C：The differentially expressed mRNAs in LPS induced 12h bMECs.
gene_id	nearest_ref_id	gene	locus	gene_id	symbol	Annotation	GO_term	KEGG	status	bMEC_Lps_12h_fpkm	bMEC_Lps_0h_fpkm	log2(fold_change)	Up/Down regulated	p_value	significant
XLOC_001247	ENSBTAT00000020266;ENSBTAT00000000802	RPL10	chr1:54649605-54654836	ENSBTAG00000022275	RPL10	Uncharacterized protein [Source:UniProtKB/TrEMBL;Acc:G8JKX9]	GO:0005840(ribosome);GO:0003735(structural constituent of ribosome);GO:0006412(translation);GO:0005622(intracellular)	NA	OK	0.462148	27.3762	-5.88842	down	0.04375	yes
XLOC_009432	-	-	chr15:50845174-50845625	ENSBTAG00000040118	-	Uncharacterized protein [Source:UniProtKB/TrEMBL;Acc:E1BMY6]	GO:0045095(keratin filament);GO:0005882(intermediate filament)	NA	OK	6.66928	70.5479	-3.403	down	5e-05	yes
XLOC_036202	-	-	chr7:76555977-76556175	ENSBTAG00000040118	-	Uncharacterized protein [Source:UniProtKB/TrEMBL;Acc:E1BMY6]	GO:0045095(keratin filament);GO:0005882(intermediate filament)	NA	OK	9.64722	82.0335	-3.08803	down	0.0344	yes
XLOC_026616	-	-	chr29:44293595-44293841	ENSBTAG00000040118	-	Uncharacterized protein [Source:UniProtKB/TrEMBL;Acc:E1BMY6]	GO:0045095(keratin filament);GO:0005882(intermediate filament)	NA	OK	3.73765	30.5032	-3.02876	down	0.0488	yes
XLOC_014546	-	-	chr18:62550281-62551896	ENSBTAG00000040118	-	Uncharacterized protein [Source:UniProtKB/TrEMBL;Acc:E1BMY6]	GO:0045095(keratin filament);GO:0005882(intermediate filament)	NA	OK	1.77634	11.3778	-2.67924	down	0.01625	yes
XLOC_015802	-	-	chr19:18848356-18848667	ENSBTAG00000040118	-	Uncharacterized protein [Source:UniProtKB/TrEMBL;Acc:E1BMY6]	GO:0045095(keratin filament);GO:0005882(intermediate filament)	NA	OK	4.13511	25.058	-2.59928	down	0.01615	yes
XLOC_035354	-	-	chr7:93195750-93195878	ENSBTAG00000040118	-	Uncharacterized protein [Source:UniProtKB/TrEMBL;Acc:E1BMY6]	GO:0045095(keratin filament);GO:0005882(intermediate filament)	NA	OK	2244.36	12084.9	-2.42883	down	0.03595	yes
XLOC_005262	ENSBTAT00000032931	ENSBTAG00000023938	chr11:72781233-72787461	ENSBTAG00000023938	-	Bos taurus centromere protein A (CENPA), mRNA. [Source:RefSeq mRNA;Acc:NM_001205380]	GO:0006334(nucleosome assembly);GO:0000786(nucleosome);GO:0046982(protein heterodimerization activity);GO:0005694(chromosome);GO:0003677(DNA binding);GO:0005634(nucleus)	NA	OK	11.3038	60.5115	-2.4204	down	5e-05	yes
XLOC_026607	-	-	chr29:44284521-44284734	ENSBTAG00000040118	-	Uncharacterized protein [Source:UniProtKB/TrEMBL;Acc:E1BMY6]	GO:0045095(keratin filament);GO:0005882(intermediate filament)	NA	OK	20.1976	104.908	-2.37687	down	0.00695	yes
XLOC_018728	ENSBTAT00000025670	CCNB1	chr20:10431452-10441126	ENSBTAG00000014239	CCNB1	Bos taurus cyclin B1 (CCNB1), mRNA. [Source:RefSeq mRNA;Acc:NM_001045872]	GO:0019901(protein kinase binding);GO:0000079(regulation of cyclin-dependent protein serine/threonine kinase activity);GO:0051726(regulation of cell cycle);GO:0051301(cell division);GO:0007067(mitotic nuclear division);GO:0005813(centrosome);GO:0007049(cell cycle);GO:0005815(microtubule organizing center);GO:0005856(cytoskeleton);GO:0005634(nucleus);GO:0005737(cytoplasm);GO:2000775(histone H3-S10…	04110(Cell cycle);04114(Oocyte meiosis);04115(p53 signaling pathway);04914(Progesterone-mediated oocyte maturation)	OK	27.502	140.753	-2.35556	down	5e-05	yes
XLOC_022476	-	-	chr24:33670347-33670505	ENSBTAG00000040118	-	Uncharacterized protein [Source:UniProtKB/TrEMBL;Acc:E1BMY6]	GO:0045095(keratin filament);GO:0005882(intermediate filament)	NA	OK	61.6844	310.207	-2.33025	down	0.0364	yes
XLOC_013746	ENSBTAT00000063946	IL11	chr18:62560970-62565324	ENSBTAG00000047400	IL11	interleukin 11 [Source:HGNC Symbol;Acc:HGNC:5966]	GO:0005142(interleukin-11 receptor binding);GO:0005125(cytokine activity);GO:0008284(positive regulation of cell proliferation);GO:0005737(cytoplasm);GO:0046888(negative regulation of hormone secretion);GO:0050731(positive regulation of peptidyl-tyrosine phosphorylation);GO:0033138(positive regulation of peptidyl-serine phosphorylation);GO:0043410(positive regulation of MAPK cascade);GO:0045944(p…	NA	OK	9.65668	46.3416	-2.26271	down	5e-05	yes
XLOC_011874	ENSBTAT00000010340	ASPM	chr16:77922302-77988157	ENSBTAG00000007860	ASPM	asp (abnormal spindle) homolog, microcephaly associated (Drosophila) [Source:HGNC Symbol;Acc:HGNC:19048]	GO:0005515(protein binding);GO:0097431(mitotic spindle pole);GO:0097150(neuronal stem cell maintenance);GO:0090306(spindle assembly involved in meiosis);GO:0072687(meiotic spindle);GO:0051661(maintenance of centrosome location);GO:0048477(oogenesis);GO:0045769(negative regulation of asymmetric cell division);GO:0021873(forebrain neuroblast division);GO:0090263(positive regulation of canonical Wnt…	NA	OK	3.61658	16.7332	-2.21002	down	5e-05	yes
XLOC_037485	-	-	chr8:48304163-48304371	ENSBTAG00000040118	-	Uncharacterized protein [Source:UniProtKB/TrEMBL;Acc:E1BMY6]	GO:0045095(keratin filament);GO:0005882(intermediate filament)	NA	OK	15.6948	72.4011	-2.20573	down	0.0298	yes
XLOC_002645	ENSBTAT00000043712	CDKN3	chr10:67155085-67171891	ENSBTAG00000019496	CDKN3	Bos taurus cyclin-dependent kinase inhibitor 3 (CDKN3), mRNA. [Source:RefSeq mRNA;Acc:NM_001040582]	GO:0004721(phosphoprotein phosphatase activity);GO:0016310(phosphorylation);GO:0016301(kinase activity);GO:0016791(phosphatase activity);GO:0016311(dephosphorylation);GO:0005515(protein binding);GO:0008138(protein tyrosine/serine/threonine phosphatase activity);GO:0006470(protein dephosphorylation);GO:0004725(protein tyrosine phosphatase activity);GO:0004722(protein serine/threonine phosphatase a…	NA	OK	4.85004	22.1038	-2.18823	down	0.00025	yes
XLOC_026611	-	-	chr29:44288679-44288994	ENSBTAG00000040118	-	Uncharacterized protein [Source:UniProtKB/TrEMBL;Acc:E1BMY6]	GO:0045095(keratin filament);GO:0005882(intermediate filament)	NA	OK	8.53162	38.0459	-2.15685	down	0.005	yes
XLOC_011829	ENSBTAT00000033913	CENPF	chr16:70438919-70501669	ENSBTAG00000024449	CENPF	centromere protein F, 350/400kDa [Source:HGNC Symbol;Acc:HGNC:1857]	GO:0008134(transcription factor binding);GO:0045502(dynein binding);GO:0042803(protein homodimerization activity);GO:0016192(vesicle-mediated transport);GO:0045120(pronucleus);GO:0016202(regulation of striated muscle tissue development);GO:0005634(nucleus);GO:0016020(membrane);GO:0051310(metaphase plate congression);GO:0010389(regulation of G2/M transition of mitotic cell cycle);GO:0005635(nuclea…	NA	OK	7.10057	31.5975	-2.1538	down	5e-05	yes
XLOC_022945	ENSBTAT00000014585	TTR	chr24:25854674-25863535	ENSBTAG00000010991	TTR	Bos taurus transthyretin (TTR), mRNA. [Source:RefSeq mRNA;Acc:NM_173967]	GO:0005179(hormone activity);GO:0006810(transport);GO:0005576(extracellular region);GO:0070062(extracellular vesicular exosome);GO:0042802(identical protein binding);GO:0005515(protein binding);GO:0005615(extracellular space)	NA	OK	7.40445	31.5021	-2.08898	down	0.0008	yes
XLOC_026615	-	-	chr29:44292809-44293144	ENSBTAG00000040118	-	Uncharacterized protein [Source:UniProtKB/TrEMBL;Acc:E1BMY6]	GO:0045095(keratin filament);GO:0005882(intermediate filament)	NA	OK	14.2736	59.3452	-2.05578	down	0.0027	yes
XLOC_035060	ENSBTAT00000011539	KIF20A	chr7:51185665-51222637	ENSBTAG00000008758	KIF20A	Bos taurus kinesin family member 20A (KIF20A), mRNA. [Source:RefSeq mRNA;Acc:NM_001046288]	GO:0000910(cytokinesis);GO:0005819(spindle);GO:0001578(microtubule bundle formation);GO:0007165(signal transduction);GO:0008017(microtubule binding);GO:0007018(microtubule-based movement);GO:0005874(microtubule);GO:0005871(kinesin complex);GO:0005856(cytoskeleton);GO:0003777(microtubule motor activity);GO:0015031(protein transport);GO:0006810(transport);GO:0005794(Golgi apparatus);GO:0008152(meta…	NA	OK	26.8628	110.996	-2.04682	down	0.0001	yes
XLOC_025349	ENSBTAT00000047341	C27H8orf4	chr27:34893818-34895119	ENSBTAG00000033304	C27H8orf4	Bos taurus chromosome 27 open reading frame, human C8orf4 (C27H8orf4), mRNA. [Source:RefSeq mRNA;Acc:NM_001035490]	GO:0006915(apoptotic process)	NA	OK	19.9058	80.3942	-2.0139	down	5e-05	yes
XLOC_027634	-	-	chr3:20151515-20151815	ENSBTAG00000040118	-	Uncharacterized protein [Source:UniProtKB/TrEMBL;Acc:E1BMY6]	GO:0045095(keratin filament);GO:0005882(intermediate filament)	NA	OK	3.78282	15.2466	-2.01095	down	0.0394	yes
XLOC_023404	ENSBTAT00000019217	PLK1	chr25:21587068-21597613	ENSBTAG00000014453	PLK1	Bos taurus polo-like kinase 1 (PLK1), mRNA. [Source:RefSeq mRNA;Acc:NM_001038173]	GO:0007094(mitotic spindle assembly checkpoint);GO:0051297(centrosome organization);GO:0000777(condensed chromosome kinetochore);GO:0000776(kinetochore);GO:0005515(protein binding);GO:0031572(G2 DNA damage checkpoint);GO:0000281(mitotic cytokinesis);GO:0000775(chromosome, centromeric region);GO:0005819(spindle);GO:0001578(microtubule bundle formation);GO:0043066(negative regulation of apoptotic p…	04110(Cell cycle);04114(Oocyte meiosis);04914(Progesterone-mediated oocyte maturation)	OK	11.9507	48.0827	-2.00843	down	5e-05	yes
XLOC_014544	-	-	chr18:62544392-62544783	ENSBTAG00000040118	-	Uncharacterized protein [Source:UniProtKB/TrEMBL;Acc:E1BMY6]	GO:0045095(keratin filament);GO:0005882(intermediate filament)	NA	OK	2.69184	10.7926	-2.00337	down	0.0232	yes
XLOC_022198	ENSBTAT00000045224	H2B	chr23:30737492-30741740	ENSBTAG00000032451	H2B	Histone H2B [Source:UniProtKB/TrEMBL;Acc:A6QQ28]	GO:0006334(nucleosome assembly);GO:0000786(nucleosome);GO:0046982(protein heterodimerization activity);GO:0005694(chromosome);GO:0003677(DNA binding);GO:0005634(nucleus)	NA	OK	12.3452	47.7862	-1.95264	down	5e-05	yes
XLOC_015801	-	-	chr19:18847983-18848188	ENSBTAG00000040118	-	Uncharacterized protein [Source:UniProtKB/TrEMBL;Acc:E1BMY6]	GO:0045095(keratin filament);GO:0005882(intermediate filament)	NA	OK	28.1706	108.362	-1.9436	down	0.01545	yes
XLOC_008188	ENSBTAT00000009992	GEM	chr14:72385681-72399660	ENSBTAG00000007596	GEM	Bos taurus GTP binding protein overexpressed in skeletal muscle (GEM), transcript variant 1, mRNA. [Source:RefSeq mRNA;Acc:NM_001083732]	GO:0006184(GTP catabolic process);GO:0007264(small GTPase mediated signal transduction);GO:0005525(GTP binding);GO:0007165(signal transduction);GO:0005622(intracellular);GO:0015031(protein transport);GO:0000166(nucleotide binding);GO:0005515(protein binding);GO:0005634(nucleus);GO:0016020(membrane);GO:0051310(metaphase plate congression);GO:0072686(mitotic spindle);GO:0051233(spindle midzone);GO:…	NA	OK	3.97616	15.121	-1.92711	down	0.00015	yes
XLOC_014547	ENSBTAT00000028044	TMEM190	chr18:62554621-62557112	ENSBTAG00000021057	TMEM190	Bos taurus transmembrane protein 190 (TMEM190), mRNA. [Source:RefSeq mRNA;Acc:NM_001205559]	GO:0016021(integral component of membrane);GO:0002079(inner acrosomal membrane);GO:0043621(protein self-association);GO:0002244(hematopoietic progenitor cell differentiation);GO:0016020(membrane);GO:0005634(nucleus)	NA	OK	31.6463	118.717	-1.90741	down	5e-05	yes
XLOC_026609	-	-	chr29:44287169-44287888	ENSBTAG00000040118	-	Uncharacterized protein [Source:UniProtKB/TrEMBL;Acc:E1BMY6]	GO:0045095(keratin filament);GO:0005882(intermediate filament)	NA	OK	3.54522	12.8955	-1.86292	down	0.00485	yes
XLOC_013747	ENSBTAT00000061400;ENSBTAT00000064126;ENSBTAT00000009474	COX6B2,ENSBTAG00000044157	chr18:62566819-62574837	NA	NA	NA	NA	NA	OK	3.23407	11.6049	-1.84331	down	0.01035	yes
XLOC_033348	ENSBTAT00000063831;ENSBTAT00000011898;ENSBTAT00000063749	CENPE	chr6:22959306-23042396	ENSBTAG00000009035	CENPE	centromere protein E, 312kDa [Source:HGNC Symbol;Acc:HGNC:1856]	GO:0008017(microtubule binding);GO:0007018(microtubule-based movement);GO:0005874(microtubule);GO:0005871(kinesin complex);GO:0003777(microtubule motor activity);GO:0008152(metabolic process);GO:0005524(ATP binding);GO:0000166(nucleotide binding);GO:0000940(condensed chromosome outer kinetochore);GO:0000778(condensed nuclear chromosome kinetochore);GO:0000776(kinetochore);GO:0000779(condensed chr…	NA	OK	3.40491	12.2126	-1.84268	down	5e-05	yes
XLOC_026608	-	-	chr29:44285003-44286049	ENSBTAG00000040118	-	Uncharacterized protein [Source:UniProtKB/TrEMBL;Acc:E1BMY6]	GO:0045095(keratin filament);GO:0005882(intermediate filament)	NA	OK	2.92463	10.4585	-1.83835	down	0.005	yes
XLOC_026690	ENSBTAT00000023529	CARNS1	chr29:45957523-45964420	ENSBTAG00000017690	CARNS1	carnosine synthase 1 [Source:HGNC Symbol;Acc:HGNC:29268]	GO:0046872(metal ion binding);GO:0005524(ATP binding);GO:0047730(carnosine synthase activity);GO:0035499(carnosine biosynthetic process);GO:0016887(ATPase activity)	NA	OK	3.43839	12.2923	-1.83795	down	0.00015	yes
XLOC_007551	ENSBTAT00000022616	TRIB3	chr13:61175908-61187528	ENSBTAG00000017007	TRIB3	Bos taurus tribbles homolog 3 (Drosophila) (TRIB3), mRNA. [Source:RefSeq mRNA;Acc:NM_001076103]	GO:0070059(intrinsic apoptotic signaling pathway in response to endoplasmic reticulum stress);GO:0004860(protein kinase inhibitor activity);GO:0034976(response to endoplasmic reticulum stress);GO:0003714(transcription corepressor activity);GO:0006915(apoptotic process);GO:0016772(transferase activity, transferring phosphorus-containing groups);GO:0006468(protein phosphorylation);GO:0004672(protei…	NA	OK	15.5333	55.1899	-1.82904	down	5e-05	yes
XLOC_026614	-	-	chr29:44291293-44292676	ENSBTAG00000040118	-	Uncharacterized protein [Source:UniProtKB/TrEMBL;Acc:E1BMY6]	GO:0045095(keratin filament);GO:0005882(intermediate filament)	NA	OK	4.23451	14.8992	-1.81497	down	0.00115	yes
XLOC_003423	ENSBTAT00000035838	ENSBTAG00000020100	chr10:30138361-30159863	NA	NA	NA	NA	NA	OK	4.95591	17.2418	-1.79869	down	0.00025	yes
XLOC_029649	ENSBTAT00000021310	KLHL7	chr4:31900914-31956645	ENSBTAG00000016010	KLHL7	Bos taurus kelch-like 7 (Drosophila) (KLHL7), mRNA. [Source:RefSeq mRNA;Acc:NM_001076037]	GO:0005515(protein binding);GO:0031463(Cul3-RING ubiquitin ligase complex);GO:0042803(protein homodimerization activity);GO:0005654(nucleoplasm);GO:0005730(nucleolus);GO:0005886(plasma membrane);GO:0005737(cytoplasm);GO:0005634(nucleus)	NA	OK	5.56189	19.1532	-1.78394	down	0.00025	yes
XLOC_035269	ENSBTAT00000019652	HMMR	chr7:77270891-77303952	ENSBTAG00000014773	HMMR	hyaluronan-mediated motility receptor (RHAMM) [Source:HGNC Symbol;Acc:HGNC:5012]	GO:0005540(hyaluronic acid binding);GO:0016020(membrane)	04512(ECM-receptor interaction)	OK	7.61505	26.0143	-1.77238	down	5e-05	yes
XLOC_006138	ENSBTAT00000052675	CKAP2	chr12:21599799-21625644	ENSBTAG00000021162	CKAP2	cytoskeleton associated protein 2 [Source:HGNC Symbol;Acc:HGNC:1990]	GO:0007026(negative regulation of microtubule depolymerization);GO:0005881(cytoplasmic microtubule);GO:0015630(microtubule cytoskeleton);GO:0000281(mitotic cytokinesis);GO:0045944(positive regulation of transcription from RNA polymerase II promoter);GO:0005813(centrosome);GO:0005737(cytoplasm)	NA	OK	27.7838	94.0132	-1.75862	down	5e-05	yes
XLOC_032758	-	-	chr5:84092363-84093737	ENSBTAG00000040118	-	Uncharacterized protein [Source:UniProtKB/TrEMBL;Acc:E1BMY6]	GO:0045095(keratin filament);GO:0005882(intermediate filament)	NA	OK	3.5676	11.9843	-1.74811	down	0.00215	yes
XLOC_026617	-	-	chr29:44294061-44294411	ENSBTAG00000040118	-	Uncharacterized protein [Source:UniProtKB/TrEMBL;Acc:E1BMY6]	GO:0045095(keratin filament);GO:0005882(intermediate filament)	NA	OK	10.086	33.7257	-1.74149	down	0.0102	yes
XLOC_011175	ENSBTAT00000050813	NEK2	chr16:73674408-73686944	ENSBTAG00000009618	NEK2	Bos taurus NIMA (never in mitosis gene a)-related kinase 2 (NEK2), mRNA. [Source:RefSeq mRNA;Acc:NM_001046270]	GO:0004713(protein tyrosine kinase activity);GO:0016772(transferase activity, transferring phosphorus-containing groups);GO:0006468(protein phosphorylation);GO:0004674(protein serine/threonine kinase activity);GO:0004672(protein kinase activity);GO:0016310(phosphorylation);GO:0016301(kinase activity);GO:0005524(ATP binding);GO:0000070(mitotic sister chromatid segregation);GO:0000794(condensed nuc…	NA	OK	9.06425	30.2829	-1.74024	down	0.00015	yes
XLOC_012050	-	-	chr17:19812208-19812724	ENSBTAG00000040118	-	Uncharacterized protein [Source:UniProtKB/TrEMBL;Acc:E1BMY6]	GO:0045095(keratin filament);GO:0005882(intermediate filament)	NA	OK	3.08854	10.2738	-1.73397	down	0.01905	yes
XLOC_026620	-	-	chr29:44296385-44296695	ENSBTAG00000040118	-	Uncharacterized protein [Source:UniProtKB/TrEMBL;Acc:E1BMY6]	GO:0045095(keratin filament);GO:0005882(intermediate filament)	NA	OK	5.55703	18.3311	-1.72191	down	0.0428	yes
XLOC_003562	ENSBTAT00000006943	CCNB2	chr10:51247754-51272733	ENSBTAG00000005269	CCNB2	Bos taurus cyclin B2 (CCNB2), mRNA. [Source:RefSeq mRNA;Acc:NM_174264]	GO:0019901(protein kinase binding);GO:0000079(regulation of cyclin-dependent protein serine/threonine kinase activity);GO:0015630(microtubule cytoskeleton);GO:0051726(regulation of cell cycle);GO:0051301(cell division);GO:0007067(mitotic nuclear division);GO:0007049(cell cycle);GO:0005634(nucleus);GO:0048538(thymus development);GO:0040007(growth);GO:0043029(T cell homeostasis);GO:0001701(in utero…	04110(Cell cycle);04114(Oocyte meiosis);04115(p53 signaling pathway);04914(Progesterone-mediated oocyte maturation)	OK	19.8202	64.8648	-1.71046	down	0.00015	yes
XLOC_011796	ENSBTAT00000010525;ENSBTAT00000063771	NCF2	chr16:66081121-66128113	ENSBTAG00000008004	NCF2	neutrophil cytosolic factor 2 [Source:HGNC Symbol;Acc:HGNC:7661]	GO:0005515(protein binding);GO:0048365(Rac GTPase binding);GO:0042554(superoxide anion generation);GO:0001669(acrosomal vesicle);GO:0005737(cytoplasm);GO:0005730(nucleolus);GO:0008022(protein C-terminus binding)	04145(Phagosome);04670(Leukocyte transendothelial migration);05140(Leishmaniasis)	OK	5.38255	17.3403	-1.68777	down	0.00035	yes
XLOC_032441	ENSBTAT00000008663	INHBE	chr5:56332209-56335907	ENSBTAG00000006599	INHBE	Bos taurus inhibin, beta E (INHBE), mRNA. [Source:RefSeq mRNA;Acc:NM_001205842]	GO:0040007(growth);GO:0005179(hormone activity);GO:0008083(growth factor activity);GO:0005576(extracellular region)	04350(TGF-beta signaling pathway)	OK	84.6771	272.481	-1.68611	down	0.0001	yes
XLOC_031756	ENSBTAT00000026353	CDCA3	chr5:103961031-103963273	ENSBTAG00000019777	CDCA3	Bos taurus cell division cycle associated 3 (CDCA3), mRNA. [Source:RefSeq mRNA;Acc:NM_001035449]	GO:0051301(cell division)	NA	OK	37.0417	118.5	-1.67766	down	0.0001	yes
XLOC_029284	ENSBTAT00000012945	CDC20	chr3:103238485-103242485	ENSBTAG00000009819	CDC20	cell division cycle 20 [Source:HGNC Symbol;Acc:HGNC:1723]	GO:0005515(protein binding);GO:0031915(positive regulation of synaptic plasticity);GO:0090129(positive regulation of synapse maturation);GO:0040020(regulation of meiosis);GO:0051488(activation of anaphase-promoting complex activity);GO:0019899(enzyme binding);GO:0031145(anaphase-promoting complex-dependent proteasomal ubiquitin-dependent protein catabolic process);GO:0005654(nucleoplasm);GO:00056…	04110(Cell cycle);04114(Oocyte meiosis);04120(Ubiquitin mediated proteolysis)	OK	23.7037	75.5525	-1.67237	down	0.0002	yes
XLOC_035749	ENSBTAT00000055062	TNFAIP8L1	chr7:20697580-20716655	ENSBTAG00000037765	TNFAIP8L1	Bos taurus tumor necrosis factor, alpha-induced protein 8-like 1 (TNFAIP8L1), mRNA. [Source:RefSeq mRNA;Acc:NM_001103270]	GO:0032007(negative regulation of TOR signaling);GO:0005515(protein binding);GO:0005737(cytoplasm)	NA	OK	3.3937	10.7805	-1.6675	down	0.0013	yes
XLOC_035261	ENSBTAT00000016162	PTTG1	chr7:74119576-74127285	ENSBTAG00000012184	PTTG1	Bos taurus pituitary tumor-transforming 1 (PTTG1), mRNA. [Source:RefSeq mRNA;Acc:NM_001034310]	GO:0007059(chromosome segregation);GO:0017124(SH3 domain binding);GO:0051301(cell division);GO:0007067(mitotic nuclear division);GO:0006974(cellular response to DNA damage stimulus);GO:0006281(DNA repair);GO:0007049(cell cycle);GO:0005634(nucleus);GO:0005737(cytoplasm);GO:0051276(chromosome organization)	NA	OK	34.8015	110.212	-1.66307	down	5e-05	yes
XLOC_015184	ENSBTAT00000011361	IGFBP4	chr19:41326677-41338255	ENSBTAG00000008611	IGFBP4	Bos taurus insulin-like growth factor binding protein 4 (IGFBP4), mRNA. [Source:RefSeq mRNA;Acc:NM_174557]	GO:0019838(growth factor binding);GO:0005520(insulin-like growth factor binding);GO:0001558(regulation of cell growth);GO:0044342(type B pancreatic cell proliferation);GO:0040008(regulation of growth);GO:0043568(positive regulation of insulin-like growth factor receptor signaling pathway);GO:0043410(positive regulation of MAPK cascade);GO:0010906(regulation of glucose metabolic process);GO:000561…	NA	OK	11.5723	36.6257	-1.66218	down	0.00015	yes
XLOC_012189	ENSBTAT00000061505	CIT	chr17:57816617-57990993	ENSBTAG00000008963	CIT	Uncharacterized protein [Source:UniProtKB/TrEMBL;Acc:F1N747]	GO:0004713(protein tyrosine kinase activity);GO:0016772(transferase activity, transferring phosphorus-containing groups);GO:0006468(protein phosphorylation);GO:0004674(protein serine/threonine kinase activity);GO:0004672(protein kinase activity);GO:0007165(signal transduction);GO:0050790(regulation of catalytic activity);GO:0005083(small GTPase regulator activity);GO:0035556(intracellular signal …	NA	OK	4.54782	14.3383	-1.65662	down	0.0001	yes
XLOC_007097	ENSBTAT00000022264	UBE2C	chr13:75306703-75311397	ENSBTAG00000016746	UBE2C	Bos taurus ubiquitin-conjugating enzyme E2C (UBE2C), mRNA. [Source:RefSeq mRNA;Acc:NM_001037449]	GO:0016881(acid-amino acid ligase activity);GO:0070936(protein K48-linked ubiquitination);GO:0004842(ubiquitin-protein transferase activity);GO:0006511(ubiquitin-dependent protein catabolic process);GO:0070979(protein K11-linked ubiquitination);GO:0051301(cell division);GO:0007067(mitotic nuclear division);GO:0005680(anaphase-promoting complex);GO:0007049(cell cycle);GO:0016874(ligase activity);G…	04120(Ubiquitin mediated proteolysis)	OK	85.9712	269.978	-1.65092	down	5e-05	yes
XLOC_017904	ENSBTAT00000009285	IGFBP5	chr2:105378990-105397707	ENSBTAG00000007062	IGFBP5	Bos taurus insulin-like growth factor binding protein 5 (IGFBP5), mRNA. [Source:RefSeq mRNA;Acc:NM_001105327]	GO:0019838(growth factor binding);GO:0005520(insulin-like growth factor binding);GO:0001558(regulation of cell growth);GO:0001968(fibronectin binding);GO:0043569(negative regulation of insulin-like growth factor receptor signaling pathway);GO:0044342(type B pancreatic cell proliferation);GO:0060056(mammary gland involution);GO:0051146(striated muscle cell differentiation);GO:0040008(regulation of…	NA	OK	3.8761	12.1302	-1.64593	down	0.00895	yes
XLOC_016792	-	-	chr2:34167098-34167634	ENSBTAG00000040118	-	Uncharacterized protein [Source:UniProtKB/TrEMBL;Acc:E1BMY6]	GO:0045095(keratin filament);GO:0005882(intermediate filament)	NA	OK	4.06709	12.6631	-1.63856	down	0.01605	yes
XLOC_029392	ENSBTAT00000042677	HJURP	chr3:114122121-114135097	ENSBTAG00000024726	HJURP	Holliday junction recognition protein [Source:HGNC Symbol;Acc:HGNC:25444]	GO:0042393(histone binding);GO:0005634(nucleus);GO:0000775(chromosome, centromeric region);GO:0051101(regulation of DNA binding);GO:0043254(regulation of protein complex assembly);GO:0007059(chromosome segregation);GO:0000777(condensed chromosome kinetochore);GO:0042802(identical protein binding);GO:0005515(protein binding);GO:0005730(nucleolus);GO:0034080(CENP-A containing nucleosome assembly);G…	NA	OK	12.6146	39.0524	-1.63032	down	0.00015	yes
XLOC_027264	ENSBTAT00000029336	CPT1A	chr29:46820294-46880915	ENSBTAG00000021999	CPT1A	Uncharacterized protein [Source:UniProtKB/TrEMBL;Acc:E1BKY3]	GO:0016746(transferase activity, transferring acyl groups);GO:0016740(transferase activity);GO:0005743(mitochondrial inner membrane);GO:0005739(mitochondrion);GO:0009437(carnitine metabolic process);GO:0004095(carnitine O-palmitoyltransferase activity);GO:0030855(epithelial cell differentiation);GO:0001676(long-chain fatty acid metabolic process);GO:0016020(membrane)	00071(Fatty acid metabolism);03320(PPAR signaling pathway);04920(Adipocytokine signaling pathway)	OK	30.2438	92.7815	-1.6172	down	5e-05	yes
XLOC_039560	ENSBTAT00000055351;-	ENSBTAG00000004563	chrX:118758065-118809076	ENSBTAG00000004563	-	Bos taurus uncharacterized LOC618701 (LOC618701), mRNA. [Source:RefSeq mRNA;Acc:NM_001099723]	NA	NA	OK	15.1402	45.8721	-1.59923	down	0.04785	yes
XLOC_026613	-	-	chr29:44289551-44290831	ENSBTAG00000040118	-	Uncharacterized protein [Source:UniProtKB/TrEMBL;Acc:E1BMY6]	GO:0045095(keratin filament);GO:0005882(intermediate filament)	NA	OK	6.01633	18.1496	-1.59298	down	0.00265	yes
XLOC_007064	ENSBTAT00000043503	PKIG	chr13:73669766-73749996	ENSBTAG00000005275	PKIG	Bos taurus protein kinase (cAMP-dependent, catalytic) inhibitor gamma (PKIG), mRNA. [Source:RefSeq mRNA;Acc:NM_205812]	GO:0006469(negative regulation of protein kinase activity);GO:0004862(cAMP-dependent protein kinase inhibitor activity);GO:0042308(negative regulation of protein import into nucleus);GO:0000122(negative regulation of transcription from RNA polymerase II promoter);GO:0071901(negative regulation of protein serine/threonine kinase activity)	NA	OK	4.44875	13.2567	-1.57525	down	0.00425	yes
XLOC_011176	ENSBTAT00000014489	SLC30A1	chr16:73764787-73771913	ENSBTAG00000010909	SLC30A1	Bos taurus solute carrier family 30 (zinc transporter), member 1 (SLC30A1), mRNA. [Source:RefSeq mRNA;Acc:NM_001205893]	GO:0008324(cation transmembrane transporter activity);GO:0055085(transmembrane transport);GO:0016021(integral component of membrane);GO:0006812(cation transport);GO:0071584(negative regulation of zinc ion transmembrane import);GO:0090281(negative regulation of calcium ion import);GO:0019855(calcium channel inhibitor activity);GO:0006829(zinc ion transport);GO:0006882(cellular zinc ion homeostasis…	NA	OK	11.6259	34.6148	-1.57405	down	0.0025	yes
XLOC_000839	ENSBTAT00000010623	MGC137058	chr1:107879011-107893160	ENSBTAG00000008078	MGC137058	Bos taurus tripartite motif containing 59 (TRIM59), mRNA. [Source:RefSeq mRNA;Acc:NM_001080310]	GO:0005515(protein binding);GO:0005622(intracellular);GO:0046872(metal ion binding);GO:0008270(zinc ion binding);GO:0046597(negative regulation of viral entry into host cell);GO:0043124(negative regulation of I-kappaB kinase/NF-kappaB signaling);GO:0004842(ubiquitin-protein transferase activity);GO:0005783(endoplasmic reticulum);GO:0045087(innate immune response);GO:0016567(protein ubiquitination)	NA	OK	4.42049	13.047	-1.56144	down	0.00235	yes
XLOC_029112	ENSBTAT00000063885;ENSBTAT00000019679	CTH	chr3:75082358-75109443	ENSBTAG00000014791	CTH	Bos taurus cystathionase (cystathionine gamma-lyase) (CTH), mRNA. [Source:RefSeq mRNA;Acc:NM_001024567]	GO:0030170(pyridoxal phosphate binding);GO:0009058(biosynthetic process);GO:0008152(metabolic process);GO:0003824(catalytic activity);GO:0044540(L-cystine L-cysteine-lyase (deaminating));GO:0044524(protein sulfhydration);GO:0043123(positive regulation of I-kappaB kinase/NF-kappaB signaling);GO:0051092(positive regulation of NF-kappaB transcription factor activity);GO:2001234(negative regulation o…	00260(Glycine, serine and threonine metabolism);00260(Glycine, serine and threonine metabolism);00270(Cysteine and methionine metabolism);00270(Cysteine and methionine metabolism);00450(Selenoamino acid metabolism);00450(Selenoamino acid metabolism);00910(Nitrogen metabolism);00910(Nitrogen metabolism)	OK	31.6562	92.8888	-1.55301	down	0.00035	yes
XLOC_017474	-	-	chr2:136770175-136770461	ENSBTAG00000040118	-	Uncharacterized protein [Source:UniProtKB/TrEMBL;Acc:E1BMY6]	GO:0045095(keratin filament);GO:0005882(intermediate filament)	NA	OK	8.37214	24.4684	-1.54725	down	0.042	yes
XLOC_031349	-	-	chr5:51210795-51211140	ENSBTAG00000040118	-	Uncharacterized protein [Source:UniProtKB/TrEMBL;Acc:E1BMY6]	GO:0045095(keratin filament);GO:0005882(intermediate filament)	NA	OK	4.96115	14.302	-1.52747	down	0.0463	yes
XLOC_005823	-	-	chr12:51025804-51026171	ENSBTAG00000040118	-	Uncharacterized protein [Source:UniProtKB/TrEMBL;Acc:E1BMY6]	GO:0045095(keratin filament);GO:0005882(intermediate filament)	NA	OK	16.895	48.2778	-1.51476	down	0.0102	yes
XLOC_033741	ENSBTAT00000064893;ENSBTAT00000001500	BMP2K	chr6:95348688-95441932	ENSBTAG00000001126	BMP2K	Uncharacterized protein [Source:UniProtKB/TrEMBL;Acc:F1MUI8]	GO:0016772(transferase activity, transferring phosphorus-containing groups);GO:0016310(phosphorylation);GO:0016301(kinase activity);GO:0008152(metabolic process);GO:0030500(regulation of bone mineralization);GO:0019208(phosphatase regulator activity);GO:0050790(regulation of catalytic activity);GO:0004672(protein kinase activity);GO:0005634(nucleus);GO:0005654(nucleoplasm)	NA	OK	18.3061	52.1098	-1.50923	down	0.0078	yes
XLOC_032233	ENSBTAT00000011203	TROAP	chr5:30658594-30665357	ENSBTAG00000008499	TROAP	TROAP protein; Uncharacterized protein [Source:UniProtKB/TrEMBL;Acc:Q08DB3]	GO:0005515(protein binding)	NA	OK	15.4746	43.8949	-1.50416	down	0.0003	yes
XLOC_012188	ENSBTAT00000011801	ACAD10	chr17:57648596-57697403	ENSBTAG00000001164	ACAD10	acyl-CoA dehydrogenase family, member 10 [Source:HGNC Symbol;Acc:HGNC:21597]	GO:0016627(oxidoreductase activity, acting on the CH-CH group of donors);GO:0003995(acyl-CoA dehydrogenase activity);GO:0050660(flavin adenine dinucleotide binding);GO:0055114(oxidation-reduction process);GO:0016772(transferase activity, transferring phosphorus-containing groups);GO:0016787(hydrolase activity);GO:0008152(metabolic process)	NA	OK	6.52526	18.4212	-1.49726	down	0.00065	yes
XLOC_029262	ENSBTAT00000020322	KIF2C	chr3:101832372-101851110	ENSBTAG00000015280	KIF2C	Bos taurus kinesin family member 2C (KIF2C), mRNA. [Source:RefSeq mRNA;Acc:NM_001101147]	GO:0008017(microtubule binding);GO:0007018(microtubule-based movement);GO:0005874(microtubule);GO:0005871(kinesin complex);GO:0003777(microtubule motor activity);GO:0008152(metabolic process);GO:0005524(ATP binding);GO:0000166(nucleotide binding);GO:0000775(chromosome, centromeric region);GO:0030951(establishment or maintenance of microtubule cytoskeleton polarity);GO:0051983(regulation of chromo…	NA	OK	6.50438	18.1774	-1.48266	down	0.00095	yes
XLOC_022427	ENSBTAT00000002357	SYT4	chr24:12950355-12960313	ENSBTAG00000001801	SYT4	Bos taurus synaptotagmin IV (SYT4), mRNA. [Source:RefSeq mRNA;Acc:NM_001098108]	GO:0005515(protein binding);GO:0006887(exocytosis);GO:0008021(synaptic vesicle);GO:0005215(transporter activity);GO:0006810(transport);GO:0007269(neurotransmitter secretion);GO:0043005(neuron projection);GO:0048471(perinuclear region of cytoplasm);GO:0005509(calcium ion binding);GO:0016020(membrane);GO:0043231(intracellular membrane-bounded organelle);GO:0005886(plasma membrane)	NA	OK	10.493	29.1496	-1.47406	down	0.00065	yes
XLOC_024470	ENSBTAT00000006763	CEP55	chr26:14868769-14890080	ENSBTAG00000005129	CEP55	Bos taurus centrosomal protein 55kDa (CEP55), mRNA. [Source:RefSeq mRNA;Acc:NM_001205761]	GO:0045171(intercellular bridge);GO:0030496(midbody);GO:0005515(protein binding);GO:0045184(establishment of protein localization);GO:0000920(cytokinetic cell separation);GO:0000281(mitotic cytokinesis);GO:0005813(centrosome);GO:0016020(membrane)	NA	OK	8.12369	22.2633	-1.45446	down	0.00155	yes
XLOC_013443	ENSBTAT00000006244;ENSBTAT00000065855;ENSBTAT00000063872	LTBP4	chr18:50173223-50202361	ENSBTAG00000004757	LTBP4	latent transforming growth factor beta binding protein 4 [Source:HGNC Symbol;Acc:HGNC:6717]	GO:0005515(protein binding);GO:0005509(calcium ion binding);GO:0046879(hormone secretion);GO:0007179(transforming growth factor beta receptor signaling pathway);GO:0050431(transforming growth factor beta binding);GO:0030162(regulation of proteolysis);GO:0070062(extracellular vesicular exosome);GO:0031012(extracellular matrix);GO:0005578(proteinaceous extracellular matrix);GO:0005615(extracellular…	NA	OK	4.53396	12.4095	-1.4526	down	0.0012	yes
XLOC_017311	-	-	chr2:126560403-126562855	ENSBTAG00000040118	-	Uncharacterized protein [Source:UniProtKB/TrEMBL;Acc:E1BMY6]	GO:0045095(keratin filament);GO:0005882(intermediate filament)	NA	OK	6.55439	17.8079	-1.44198	down	0.0289	yes
XLOC_030341	-	-	chr4:31738162-31738664	ENSBTAG00000040118	-	Uncharacterized protein [Source:UniProtKB/TrEMBL;Acc:E1BMY6]	GO:0045095(keratin filament);GO:0005882(intermediate filament)	NA	OK	6.38152	17.2942	-1.43832	down	0.0251	yes
XLOC_002424	ENSBTAT00000045876;ENSBTAT00000056746	C10H15ORF23	chr10:36117897-36127741	ENSBTAG00000032340	C10H15ORF23	Bos taurus chromosome 10 open reading frame, human C15orf23 (C10H15orf23), mRNA. [Source:RefSeq mRNA;Acc:NM_001038055]	GO:0005515(protein binding);GO:0072686(mitotic spindle);GO:0000070(mitotic sister chromatid segregation);GO:0007059(chromosome segregation);GO:0035371(microtubule plus-end);GO:0051988(regulation of attachment of spindle microtubules to kinetochore);GO:0000776(kinetochore);GO:0015630(microtubule cytoskeleton);GO:0007051(spindle organization);GO:0005737(cytoplasm)	NA	OK	18.2828	49.4104	-1.43433	down	0.0009	yes
XLOC_030479	ENSBTAT00000046371	ANLN	chr4:61164854-61242549	ENSBTAG00000009218	ANLN	anillin, actin binding protein [Source:HGNC Symbol;Acc:HGNC:14082]	GO:0002244(hematopoietic progenitor cell differentiation);GO:0090521(glomerular visceral epithelial cell migration);GO:0005826(actomyosin contractile ring);GO:0005654(nucleoplasm);GO:0043231(intracellular membrane-bounded organelle);GO:0015629(actin cytoskeleton);GO:0000281(mitotic cytokinesis);GO:0003779(actin binding)	NA	OK	31.779	85.7281	-1.43169	down	0.002	yes
[truncated: 301 more rows]
