# Supplementary material for: Integrated Analysis of Transcriptome mRNA and miRNA Profiles Reveals Self-Protective Mechanism of Bovine MECs Induced by LPS
Source: Front Vet Sci. 2022 Jun 23;9:890043. doi: 10.3389/fvets.2022.890043 (PMC9260119; doi:10.3389/fvets.2022.890043)
Supplement: Supplementary Table 4 — The differentially expressed miRNAs (DEMs) in LPS-induced 4, 8, and 12 h bMECs. (A) DEMs in LPS-induced 4 h bMECs. (B) DEMs in LPS-induced 8 h bMECs. (C) DEMs in LPS-induced 12 h bMECs. [file Table_4.XLSX]

## Sheet: 4h vs 0h differentially miRNAs
Supplementary Table 4A：The differentially expressed miRNAs in LPS induced 4h bMECs
Index	miR_name	miR_seq	up/down	fold_change(bMEC_Lps_4h/bMEC_Lps_0h)	log2(fold_change)	pvalue(chi_square_2x2)	pvalue(fisher_test)	bMEC_Lps_0h(norm)	bMEC_Lps_4h(norm)	bMEC_Lps_0h(raw)	bMEC_Lps_4h(raw)	Expression level
26	bta-miR-449a	TGGCAGTGTATTGTTAGCTGGT	down	0.375675	-1.41244	0	0	5546.89	2083.83	5590	2565	middle
31	bta-miR-21-3p_L+1R-2	CAACAGCAGTCGATGGGCTGT	down	0.391972	-1.35118	0	0	19598.7	7682.13	19751	9456	high
43	bta-miR-125b	TCCCTGAGACCCTAACTTGTGA	down	0.458347	-1.12549	0	0	35702.1	16363.9	35979.5	20142.5	high
77	hsa-miR-30a-3p	CTTTCAGTCGGATGTTTGCAGC	up	2.04059	1.02899	0	1.40283e-181	3430.84	7000.93	3457.5	8617.5	middle
83	bta-miR-182	TTTGGCAATGGTAGAACTCACACT	up	2.12413	1.08687	0	0	7832.13	16636.5	7893	20478	high
84	bta-miR-30a-5p	TGTAAACATCCTCGACTGGAAGCT	up	2.13027	1.09104	0	0	109471	233202	110321	287050	high
87	bta-miR-224_R-1	CAAGTCACTAGTGGTTCCGTTT	up	2.17599	1.12167	0	0	10279.1	22367.2	10359	27532	high
93	mdo-miR-26-5p_R+2	TTCAAGTAATCCAGGATAGGCTT	up	2.29969	1.20144	0	0	7710.08	17730.8	7770	21825	high
96	pma-miR-23b_R+1_1ss23CT	ATCACATTGCCAGGGATTACCATT	up	2.31831	1.21308	0	0	3972.13	9208.65	4003	11335	high
100	bta-miR-95_R-1	TTCAACGGGTATTTATTGAGC	up	2.39096	1.25759	0	8.93991e-123	1320.74	3157.83	1331	3887	middle
110	bta-miR-200a	TAACACTGTCTGGTAACGATGTT	up	2.87841	1.52527	0	0	3246.77	9345.54	3272	11503.5	high
113	bta-miR-200b_R+2	TAATACTGCCTGGTAATGATGAC	up	2.98166	1.57611	0	0	5103.34	15216.4	5143	18730	high
125	bta-miR-19a_2ss11TC23AT	TGTGCAAATCCATGCAAAACTGT	up	3.77608	1.91689	0	0	1206.79	4556.93	1216.17	5609.17	middle
131	hhi-miR-26_R+3	TTCAAGTAATCCAGGATAGGCTTA	up	4.32356	2.11222	0	0	876.191	3788.26	883	4663	middle
134	bta-miR-19b	TGTGCAAATCCATGCAAAACTGA	up	4.95944	2.31018	0	0	3770.86	18701.4	3800.17	23019.7	high
101	bta-miR-1839_R-2	AAGGTAGATAGAACAGGTCTTG	up	2.41279	1.2707	6.2022e-70	1.61749e-72	749.178	1807.61	755	2225	middle
115	ssa-miR-10d-5p_L-1R+3	ACCCTGTAGAACCGAATTTGTGTT	up	3.27245	1.71037	9.3823e-70	4.42404e-74	333.409	1091.06	336	1343	middle
46	hsa-miR-615-3p_R-1	TCCGAGCCTGGGTCTCCCTCT	down	0.481721	-1.05373	1.3593e-68	2.80634e-69	1195.71	575.997	1205	709	middle
9	hsa-miR-33b-3p_R-1	CAGTGCCTCGGCAGTGCAGCC	down	0.270878	-1.88428	1.9525e-62	5.91791e-65	533.851	144.609	538	178	middle
130	oha-miR-30b-5p_R+3	TGTAAACATCCTACACTCAGCTTTT	up	4.26497	2.09254	2.0671e-62	1.1984e-67	170.674	727.918	172	896	middle
79	aca-miR-191-5p_R+3_2	CAACGGAATCCCAAAAGCAGCTGTTT	up	2.04524	1.03227	3.0621e-55	1.55381e-56	1035.95	2118.76	1044	2608	middle
80	aca-miR-191-5p_R+3_1	CAACGGAATCCCAAAAGCAGCTGTAT	up	2.04524	1.03227	3.0621e-55	1.55381e-56	1035.95	2118.76	1044	2608	middle
122	gga-miR-3535_L+1_1ss25AG	TGGATATGATGACTGATTATCTGAGA	up	3.46382	1.79237	1.3241e-52	4.15191e-56	219.296	759.602	221	935	middle
40	hsa-miR-125b-1-3p	ACGGGTTAGGCTCTTGGGAGCT	down	0.450838	-1.14932	4.6959e-44	1.66608e-44	675.749	304.653	681	375	middle
95	mmu-let-7j_1ss8TG	TGAGGTAGTAGTTTGTGCTGTTAT	up	2.30845	1.20692	1.1279e-42	6.52768e-44	516.982	1193.43	521	1469	middle
132	ssa-miR-10d-5p_R+4_1ss1CT	TACCCTGTAGAACCGAATTTGTGTTT	up	4.51918	2.17606	1.7124e-41	2.98965e-45	100.221	452.918	101	557.5	middle
126	ccr-miR-17-5p_R+2	CAAAGTGCTTACAGTGCAGGTAGAA	up	3.8229	1.93467	5.9938e-37	1.42921e-39	123.044	470.384	124	579	middle
114	bta-miR-135a	TATGGCTTTTTATTCCTATGTGA	up	3.06381	1.61533	5.1732e-35	8.58586e-37	190.519	583.715	192	718.5	middle
94	bta-miR-429	TAATACTGTCTGGTAATGCCGT	up	2.30032	1.20183	2.4632e-32	2.66221e-33	390.962	899.336	394	1107	middle
7	bta-miR-2320-5p	TGGCACAGGGTCCAGCTGTCGGC	down	0.220425	-2.18164	4.2805e-29	8.52972e-31	206.396	45.4949	208	56	middle
33	PC-3p-4634_200	AAAACCTGAATGACCCTTTTGG	down	0.401136	-1.31784	1.2074e-25	7.0539e-26	321.005	128.767	323.5	158.5	middle
112	bta-miR-664b_R+1	TATTCATTTATCTCCCAGCCTACA	up	2.9671	1.56905	5.2617e-23	3.60062e-24	131.974	391.581	133	482	middle
42	PC-5p-2325_556	ATAATGCACATGTATGAACATA	down	0.456961	-1.12986	5.5096e-20	2.66895e-20	298.679	136.485	301	168	middle
140	oan-miR-30d-5p_R+1_1ss12CA	TGTAAACATCCACGACTGGAAGCT	up	9.4153	3.23501	6.9958e-13	1.52053e-14	8.9306	84.0843	9	103.5	middle
78	bta-miR-20b_R+3_1ss10CT	CAAAGTGCTTACAGTGCAGGTAGTT	up	2.04294	1.03065	1.9398e-12	9.64552e-13	210.365	429.764	212	529	middle
10	hsa-miR-802_L+1R-2	TCAGTAACAAAGATTCATCCTT	down	0.281436	-1.82912	4.2129e-12	3.64095e-12	95.2597	26.8095	96	33	middle
92	mmu-miR-200b-5p	CATCTTACTGGGCAGCATTGGA	up	2.2838	1.19144	1.0664e-11	7.30027e-12	131.974	301.403	133	371	middle
231	bta-miR-1246_L+1R+4	AAATGGATTTTTGGAGCAGGGAGT		0.500566	-0.998369	1.3719e-11	1.36228e-11	191.512	95.8642	193	118	middle
118	cgr-miR-486-5p_R+2	TCCTGTACTGAGCTGCCCCGAGTT	up	3.29231	1.7191	2.9582e-11	1.2522e-11	46.6376	153.545	47	189	middle
41	bta-miR-143_1ss22GT	TGAGATGAAGCACTGTAGCTCT	down	0.453536	-1.14071	3.8783e-10	4.3066e-10	137.928	62.5554	139	77	middle
99	PC-5p-2352_548	GAAAGTTTGTTGGGGTTTTTCT	up	2.36717	1.24317	2.1044e-09	1.32137e-09	91.2906	216.101	92	266	middle
85	dre-miR-30e-5p_R+2_1ss13TC	TGTAAACATCCTCGACTGGAAGCC	up	2.13723	1.09574	4.4487e-09	3.82903e-09	123.54	264.033	124.5	325	middle
121	hsa-miR-342-5p_R+5_1ss17AG	AGGGGTGCTATCTGTGGTTGAGGACA	up	3.45398	1.78826	7.0403e-09	3.24616e-09	31.7532	109.675	32	135	middle
21	PC-3p-6776_112	TGCTATCTCTATAAGTATCAGA	down	0.341998	-1.54794	1.1347e-08	1.17122e-08	78.3908	26.8095	79	33	middle
102	pma-miR-30a-5p_R+2	TGTAAACATCCTCGACTGGAAGCCT	up	2.45071	1.2932	1.1601e-08	6.09424e-09	74.4217	182.386	75	224.5	middle
27	PC-3p-7967_88	CCCAAGTGAACTTGTTGGCC	down	0.376798	-1.40814	1.2747e-08	1.25899e-08	87.3214	32.9025	88	40.5	middle
90	mmu-miR-1839-3p	AGACCTACTTATCTACCAACAGC	up	2.24115	1.16424	1.3247e-08	1.03867e-08	98.2366	220.163	99	271	middle
124	aca-miR-200b-3p_R+2	TAATACTGCCTGGTAATGATGATT	up	3.66909	1.87542	1.3692e-08	7.90705e-09	26.7918	98.3014	27	121	middle
144	ola-let-7g_R+5_1ss18TC	TGAGGTAGTAGTTTGTACAGTTTTT	up	34.3863	5.10376	1.8297e-07	1.06437e-08	0.992289	34.1211	1	42	middle
138	fru-miR-200a_R+3	TAACACTGTCTGGTAACGATGTTTT	up	7.91431	2.98446	2.1352e-07	4.75743e-08	5.95373	47.1197	6	58	middle
1	bta-miR-133a_L-1R+1	TTGGTCCCCTTCAACCAGCTGT	down	0.113361	-3.141	2.3015e-07	2.15605e-07	32.2494	3.65584	32.5	4.5	middle
48	hsa-miR-188-3p	CTCCCACATGCAGGGTTTGCA	down	0.486599	-1.0392	2.6902e-07	3.00006e-07	105.183	51.1817	106	63	middle
230	bta-miR-2425-5p	CCAGGGCACGGATCCATGAACT		0.50033	-0.999048	4.1988e-07	7.10034e-07	107.167	53.6189	108	66	middle
35	bta-miR-138_R+1	AGCTGGTGTTGTGAATCAGGCCGT	down	0.412002	-1.27928	4.9346e-07	6.17846e-07	76.9024	31.6839	77.5	39	middle
86	aca-miR-128-3p_R+2	TCACAGTGAACCGGTCTCTTTTT	up	2.14562	1.10139	7.8636e-07	6.78856e-07	86.3291	185.229	87	228	middle
119	hsa-miR-4286_R+3	ACCCCACTCCTGGTACCATT	up	3.37723	1.75584	1.0069e-06	9.2747e-07	23.8149	80.4284	24	99	middle
18	aca-miR-99b-5p_R-1	AACCCGTAGATCCGAACTTGCG	down	0.327489	-1.61048	1.0779e-06	8.34866e-07	54.5759	17.873	55	22	middle
143	xtr-miR-301_R+3_1ss4TC	CAGCGCAATAGTATTGTCAAAGCATT	up	18.5577	4.21395	6.7386e-06	4.55346e-07	1.48843	27.6219	1.5	34	middle
6	PC-3p-24213_18	AGATGCACTGAATCTATTTGAG	down	0.191035	-2.38809	8.9282e-06	1.22477e-05	29.7687	5.68686	30	7	middle
123	pol-let-7a-5p_R+3_1ss17AG	TGAGGTAGTAGGTTGTGTGGTTTGT	up	3.47957	1.79891	1.1983e-05	9.03639e-06	17.8612	62.1492	18	76.5	middle
139	oan-let-7f-5p_R+3	TGAGGTAGTAGATTGTATAGTTATT	up	8.77202	3.13291	2.0175e-05	4.83395e-06	3.47301	30.4653	3.5	37.5	middle
133	dre-miR-193a-3p_R+2	AACTGGCCTACAAAGTCCCAGTTT	up	4.54845	2.18538	5.0787e-05	2.73495e-05	8.9306	40.6204	9	50	middle
32	PC-3p-10719_57	AGGAACCCAGATGAACTTTCT	down	0.400651	-1.31958	6.5132e-05	6.47071e-05	46.6376	18.6854	47	23	middle
107	bta-miR-326_R+1	CCTCTGGGCCCTTCCTCCAGT	up	2.72907	1.44841	6.5507e-05	7.60103e-05	26.7918	73.1167	27	90	middle
89	ssa-miR-30d-2-3p_2ss1TC23TA	CTTTCAGTCGGATGTTTGCAGCA	up	2.23895	1.16282	6.5685e-05	8.24569e-05	48.6221	108.863	49	134	middle
24	mmu-miR-185-3p_2ss18TC21TC	AGGGGCTGGCTTTCCTCCGGC	down	0.356879	-1.48649	9.0439e-05	8.84694e-05	38.6993	13.8109	39	17	middle
108	xtr-miR-93b_L+2R+2	CAAAGTGCTGTTCGTGCAGGTAGAT	up	2.7973	1.48403	0.00010031	8.46651e-05	23.8149	66.6175	24	82	middle
74	bta-miR-2431-5p	CAGGTCATATAAGTGTGGAGTT	up	2.00002	1.00001	0.00010451	9.10872e-05	69.4602	138.922	70	171	middle
45	bta-miR-2399-3p	TTCTAACAACTACAGAAAGTGT	down	0.467841	-1.09591	0.00010849	9.20941e-05	55.5682	25.9971	56	32	middle
44	PC-3p-12036_48	TAAAACCCGAGCTCCTTGTTAG	down	0.463427	-1.10958	0.00014697	0.000130665	52.5913	24.3722	53	30	middle
105	dre-miR-30e-3p_R+1_1ss22CT	CTTTCAGTCGGATGTTTGCAGTA	up	2.51263	1.3292	0.00023103	0.000289556	28.7764	72.3043	29	89	middle
25	bta-miR-2285m_L+1R-1_1ss7GA	AAAAACACAAATGAACTTTTTG	down	0.374772	-1.41591	0.00026611	0.00025311	35.6232	13.3506	35.9	16.4333	middle
106	PC-5p-3461_312	TCTTTGTAGTATCCTGAGT	up	2.70534	1.43581	0.00027149	0.000284355	22.8226	61.743	23	76	middle
2	PC-3p-31381_13	AAAAACCCGAATGCACTTCTTG	down	0.172362	-2.53648	0.00028022	0.000160455	18.8535	3.24963	19	4	middle
37	PC-3p-10629_57	AAACCCAGAGTAAACTTTTTAG	down	0.419345	-1.25379	0.00030456	0.000305196	40.6838	17.0606	41	21	middle
36	bta-miR-138	AGCTGGTGTTGTGAATCAGGCCG	down	0.414543	-1.27041	0.00035102	0.000363704	39.1954	16.2482	39.5	20	middle
12	mmu-miR-330-5p_R+1	TCTCTGGGCCTGTGTCTTAGGCT	down	0.293504	-1.76855	0.00035304	0.000491933	26.2957	7.71788	26.5	9.5	middle
13	eca-miR-330_R+1	TCTCTGGGCCTGTGTCTTAGGCT	down	0.293504	-1.76855	0.00035304	0.000491933	26.2957	7.71788	26.5	9.5	middle
135	bta-miR-127	TCGGATCCGTCTGAGCTTGGCT	up	5.40356	2.43391	0.00043736	0.000293745	4.96144	26.8095	5	33	middle
39	PC-3p-9384_69	AAAACTAGAATGAACTTTTTGG	down	0.43463	-1.20214	0.00047523	0.000460313	40.1877	17.4668	40.5	21.5	middle
29	PC-5p-22686_20	CCAAGACCATACATTAGGTGTA	down	0.383776	-1.38166	0.00069673	0.000700752	31.7532	12.1861	32	15	middle
72	PC-3p-28930_14	GTTCGGACATATATTTTT	up	inf	inf	0.0010739	0.000629394	0	12.1861	0	15	middle
116	mdo-miR-106-5p_L-1R+1_1ss12TC	AAAGTGCTTACAGTGCAGGTAGA	up	3.27489	1.71145	0.0010801	0.000787695	11.4113	37.3708	11.5	46	middle
120	bta-miR-6516	TTTGCAGTAACAGGTGTGAAC	up	3.43863	1.78183	0.0012785	0.00131537	9.92289	34.1211	10	42	middle
97	bta-miR-122	TGGAGTGTGACAATGGTGTTTG	up	2.33487	1.22334	0.0015003	0.00143458	26.7918	62.5554	27	77	middle
81	hsa-miR-6516-3p	ATCATGTATGATACTGCAAACA	up	2.0468	1.03337	0.0021514	0.00255794	39.6915	81.2408	40	100	middle
109	pma-miR-196b_R+3_1ss9AT	TAGGTAGTTTCATGTTGTTGGGTAT	up	2.86553	1.5188	0.0021713	0.00240162	13.892	39.808	14	49	middle
71	PC-5p-53042_6	TTCTCAGTGGCTCAGTTCTGC	up	inf	inf	0.0023299	0.00121028	0	10.5613	0	13	middle
82	hsa-miR-1277-5p_L-3R+2	TATATATATATATGTACGTATGA	up	2.05226	1.03722	0.0028242	0.00329813	37.2108	76.3664	37.5	94	middle
8	PC-3p-28322_14	TAGTTCACCTATGTGTCTGTCC	down	0.255851	-1.96663	0.0032506	0.00306506	15.8766	4.06204	16	5	middle
22	PC-3p-32471_12	AACTGTTAGGAGGCTTGGCTGCT	down	0.350881	-1.51095	0.0037174	0.00369851	20.8381	7.31167	21	9	middle
103	ssa-miR-155-5p_R+3	TTAATGCTAATCGTGATAGGGGTTTA	up	2.50433	1.32442	0.005021	0.00590837	16.8689	42.2452	17	52	middle
104	oan-miR-96-5p_R+2	TTTGGCACTAGCACATTTTTGCTTT	up	2.50433	1.32442	0.005021	0.00590837	16.8689	42.2452	17	52	middle
136	xtr-miR-19b_R+1_1ss11CT	TGTGCAAATCTATGCAAAACTGAC	up	6.95913	2.79891	0.0064776	0.00541036	1.98458	13.8109	2	17	middle
47	PC-3p-11905_49	AAAAACTAGAATGAACTTTTTG	down	0.485682	-1.04192	0.006562	0.00863471	29.2725	14.2171	29.5	17.5	middle
88	PC-5p-7121_105	AAAAAGTTAGTTTAGGTTTTTC	up	2.18883	1.13016	0.0066323	0.00604111	24.3111	53.2127	24.5	65.5	middle
38	bta-miR-126-5p	CATTATTACTTTTGGTACGCG	down	0.427159	-1.22715	0.0076263	0.0087603	22.8226	9.7489	23	12	middle
127	mmu-miR-101c_L+1R+2	TACAGTACTGTGATAACTGATC	up	3.92986	1.97448	0.0087245	0.0128464	4.96144	19.4978	5	24	middle
11	bta-miR-2415-3p_R+1	CCAGGCCTGCTGGACCGACGCC	down	0.292401	-1.77398	0.0092834	0.00907052	13.892	4.06204	14	5	middle
142	PC-5p-41210_9	TCAGTGGCAGAGTGCAGGGACCT	up	10.6434	3.41188	0.009341	0.00759999	0.992289	10.5613	1	13	middle
91	bta-miR-34c_R+1	AGGCAGTGTAGTTAGCTGATTGC	up	2.2838	1.19144	0.010197	0.010917	18.8535	43.0576	19	53	middle
98	bta-miR-211_R+1	TTCCCTTTGTCATCCTTTGCCC	up	2.35984	1.23869	0.010405	0.011302	16.8689	39.808	17	49	middle
117	bta-miR-6121-3p_L+1	GCCGGATGATGGACACTGAGG	up	3.27489	1.71145	0.010764	0.0101875	6.94602	22.7474	7	28	middle
16	PC-3p-28155_15	AAAACCCGAGTGAACTTTTTGG	down	0.30323	-1.72151	0.012025	0.0153482	13.3959	4.06204	13.5	5	middle
111	pma-miR-18a-5p_R+2	TAAGGTGCATCTAGTGCAGATAGTT	up	2.91101	1.54152	0.012138	0.0165068	8.9306	25.9971	9	32	middle
30	mml-miR-145-3p_R-1	GGATTCCTGGAAATACTGTTCT	down	0.385281	-1.37602	0.013693	0.0110745	16.8689	6.49927	17	8	middle
141	bta-miR-205_R+1	TCCTTCATTCCACCGGAGTCTGT	up	9.82466	3.29641	0.013755	0.013565	0.992289	9.7489	1	12	middle
137	bta-mir-2284o-p5_1ss17GT	GGAAAGTTCGTTCGGGTTTTT	up	7.3685	2.88137	0.013849	0.00759999	1.48843	10.9675	1.5	13.5	middle
129	bta-miR-2370-3p_R+2	TAAGCAACTTTCCTTTCTCCACC	up	4.09361	2.03337	0.014558	0.022729	3.96915	16.2482	4	20	middle
75	bta-mir-29e-p5	CTGGTTTCACATGGTGGCTTAGA	up	2.02272	1.0163	0.016645	0.015764	25.3034	51.1817	25.5	63	middle
76	mdo-miR-29b-2-5p_L-1	CTGGTTTCACATGGTGGCTTAGA	up	2.02272	1.0163	0.016645	0.015764	25.3034	51.1817	25.5	63	middle
59	PC-5p-27994_15	TAACATGGAGGTGGCCAGAGT	up	inf	inf	0.016923	0.0332472	0	6.49927	0	8	middle
23	PC-3p-10077_62	AAAAACCTGAATGACCCTTTTGG	down	0.350881	-1.51095	0.017845	0.0212866	13.892	4.87445	14	6	middle
28	PC-3p-25832_16	AGACGGTTTAATTTTTCAT	down	0.38207	-1.38809	0.019899	0.0280279	14.8843	5.68686	15	7	middle
34	bta-miR-7863	ATGGACTGTCACCTGAGGAGC	down	0.409361	-1.28855	0.021711	0.0177224	15.8766	6.49927	16	8	middle
14	PC-3p-40931_9	GAAAAACTCAAATGAACTTCT	down	0.297717	-1.74799	0.02221	0.0283215	10.9152	3.24963	11	4	middle
15	PC-3p-29481_14	TTGATATGTCCTGAGACGCGGA	down	0.297717	-1.74799	0.02221	0.0283215	10.9152	3.24963	11	4	middle
20	bta-miR-2323	TGACCTGATCATGCTTACTGAGC	down	0.341134	-1.55159	0.025863	0.0414982	11.9075	4.06204	12	5	middle
128	PC-5p-16864_30	AACGTAGGTTTTATTTTTT	up	4.09361	2.03337	0.034357	0.0408594	2.97687	12.1861	3	15	middle

## Sheet: 8h vs 0h differentially miRNAs
Supplementary Table 4B：The differentially expressed miRNAs in LPS induced 8h bMECs
Index	miR_name	miR_seq	up/down	fold_change(bMEC_Lps_8h/bMEC_Lps_0h)	log2(fold_change)	pvalue(chi_square_2x2)	pvalue(fisher_test)	bMEC_Lps_0h(norm)	bMEC_Lps_8h(norm)	bMEC_Lps_0h(raw)	bMEC_Lps_8h(raw)	Expression level
44	bta-miR-100	AACCCGTAGATCCGAACTTGTG	down	0.410017	-1.28625	0	0	108307	44407.6	109148	45332.5	high
96	mdo-miR-26-5p_R+2	TTCAAGTAATCCAGGATAGGCTT	up	2.25121	1.1707	0	0	7710.08	17357	7770	17718.5	high
40	hsa-miR-221-5p_R+4	ACCTGGCATACAATGTAGATTTCTGT	down	0.394371	-1.34237	0	0	6115.48	2411.77	6163	2462	high
112	bta-miR-200b_R+2	TAATACTGCCTGGTAATGATGAC	up	2.86086	1.51645	0	0	5103.34	14599.9	5143	14904	high
118	bta-miR-200a	TAACACTGTCTGGTAACGATGTT	up	3.36593	1.751	0	0	3246.77	10928.4	3272	11156	high
89	gga-miR-30b-5p_R+1	TGTAAACATCCTACACTCAGCTT	up	2.05095	1.03629	0	1.87327e-185	2790.32	5722.81	2812	5842	middle
99	bta-miR-29d-3p_1ss19AG	TAGCACCATTTGAAATCGGTTA	up	2.43328	1.2829	0	1.16074e-239	2085.82	5075.39	2102.03	5181.1	middle
100	bta-miR-29c	TAGCACCATTTGAAATCGGTTA	up	2.43328	1.2829	0	1.16074e-239	2085.82	5075.39	2102.03	5181.1	middle
91	bta-miR-2478_L-2	ATCCCACTTCTGACACCA	up	2.1074	1.07546	0	9.55956e-128	1738.49	3663.69	1752	3740	middle
98	bta-miR-95_R-1	TTCAACGGGTATTTATTGAGC	up	2.40683	1.26714	0	1.08913e-147	1320.74	3178.79	1331	3245	middle
64	bta-miR-19a_2ss11TC23AT	TGTGCAAATCCATGCAAAACTGT	down	0.474191	-1.07646	5.3016e-61	5.78396e-62	1206.79	572.248	1216.17	584.167	middle
12	aca-miR-191-5p_R+3_2	CAACGGAATCCCAAAAGCAGCTGTTT	down	0.208978	-2.25857	0	3.61968e-141	1035.95	216.491	1044	221	middle
13	aca-miR-191-5p_R+3_1	CAACGGAATCCCAAAAGCAGCTGTAT	down	0.208978	-2.25857	0	3.61968e-141	1035.95	216.491	1044	221	middle
72	bta-miR-2285k_R+1_2	AAAACCGGAATGAACTTTTTGT	down	0.488371	-1.03395	4.9244e-42	1.16343e-42	869.058	424.423	875.811	433.262	middle
73	bta-miR-2285k_R+1_1	AAAACCGGAATGAACTTTTTGG	down	0.488371	-1.03395	4.9244e-42	1.16343e-42	869.058	424.423	875.811	433.262	middle
102	bta-miR-1839_R-2	AAGGTAGATAGAACAGGTCTTG	up	2.53275	1.3407	0	1.12353e-97	749.178	1897.48	755	1937	middle
54	hsa-miR-125b-1-3p	ACGGGTTAGGCTCTTGGGAGCT	down	0.446492	-1.1633	8.6736e-39	1.72878e-39	675.749	301.716	681	308	middle
27	hsa-miR-33b-3p_R-1	CAGTGCCTCGGCAGTGCAGCC	down	0.330293	-1.59818	1.5579e-46	2.53922e-48	533.851	176.328	538	180	middle
38	bta-miR-449b_R+3	AGGCAGTGTATTGTTAGCTGGCTGC	down	0.386134	-1.37283	3.4774e-37	4.08806e-38	514.998	198.858	519	203	middle
111	bta-miR-429	TAATACTGTCTGGTAATGCCGT	up	2.84888	1.51039	2.5047e-67	2.68045e-70	390.962	1113.8	394	1137	middle
71	PC-3p-4634_200	AAAACCTGAATGACCCTTTTGG	down	0.482161	-1.05241	6.1828e-17	4.44333e-17	321.005	154.776	323.5	158	middle
70	PC-5p-2325_556	ATAATGCACATGTATGAACATA	down	0.482126	-1.05252	7.25e-16	4.29769e-16	298.679	144.001	301	147	middle
66	bta-miR-20b_R+3_1ss10CT	CAAAGTGCTTACAGTGCAGGTAGTT	down	0.477307	-1.06701	8.1391e-12	7.44992e-12	210.365	100.409	212	102.5	middle
35	bta-miR-2320-5p	TGGCACAGGGTCCAGCTGTCGGC	down	0.37495	-1.41523	1.8526e-16	8.79931e-17	206.396	77.3882	208	79	middle
92	bta-miR-4286_R+1	ACCCCACTCCTGGTACCA	up	2.11123	1.07809	1.2275e-14	9.24597e-15	182.581	385.472	184	393.5	middle
61	PC-3p-3939_256	AAACTTGAATGAACCTTTTGGC	down	0.466733	-1.09933	2.3665e-10	2.11948e-10	173.154	80.8168	174.5	82.5	middle
67	mml-miR-449a-3p_L+1_1ss21GA	TCAGCTAACATGCAACTGCTATC	down	0.479502	-1.06039	3.1927e-08	3.75055e-08	138.92	66.6126	140	68	middle
24	bta-miR-143_1ss22GT	TGAGATGAAGCACTGTAGCTCT	down	0.305396	-1.71125	3.0306e-14	9.58354e-15	137.928	42.1227	139	43	middle
90	bta-miR-664b_R+1	TATTCATTTATCTCCCAGCCTACA	up	2.10061	1.0708	7.9367e-11	6.29167e-11	131.974	277.226	133	283	middle
101	mmu-miR-200b-5p	CATCTTACTGGGCAGCATTGGA	up	2.47916	1.30985	4.7765e-17	1.66993e-17	131.974	327.186	133	334	middle
42	bta-miR-2425-5p	CCAGGGCACGGATCCATGAACT	down	0.402197	-1.31403	1.671e-08	1.56979e-08	107.167	43.1023	108	44	middle
75	bta-miR-2355-5p_L+2R-2	TTCCCAGATACAATGGACAATAT	down	0.498306	-1.0049	4.0692e-06	4.15555e-06	104.19	51.9187	105	53	middle
97	mmu-miR-1839-3p	AGACCTACTTATCTACCAACAGC	up	2.28355	1.19128	1.3769e-10	9.14308e-11	98.2366	224.328	99	229	middle
63	bta-mir-7857-p3	TTTGTTCTCCAACCTGGCTCTTT	down	0.473458	-1.07869	2.8117e-06	3.21407e-06	97.2443	46.0411	98	47	middle
22	hsa-miR-802_L+1R-2	TCAGTAACAAAGATTCATCCTT	down	0.29822	-1.74555	1.6551e-10	7.90619e-11	95.2597	28.4083	96	29	middle
58	bta-miR-449c_R+5	AGGCAGTGCATCTCTAGCTGGCTGTT	down	0.452471	-1.1441	1.3398e-06	1.36333e-06	95.2597	43.1023	96	44	middle
76	PC-3p-7967_88	CCCAAGTGAACTTGTTGGCC	down	0.499214	-1.00227	2.5496e-05	3.42463e-05	87.3214	43.5921	88	44.5	middle
65	PC-3p-6776_112	TGCTATCTCTATAAGTATCAGA	down	0.474861	-1.07442	2.7443e-05	3.27075e-05	78.3908	37.2247	79	38	middle
21	bta-miR-138_R+1	AGCTGGTGTTGTGAATCAGGCCGT	down	0.28024	-1.83526	3.2869e-09	3.45784e-09	76.9024	21.5511	77.5	22	middle
68	bta-miR-199b_2ss10TC17TC	CCCAGTGTTCAGACTACCTGTTC	down	0.479789	-1.05953	0.00015641	0.000140157	64.9949	31.1839	65.5	31.8333	middle
69	bta-miR-199a-5p_R+1	CCCAGTGTTCAGACTACCTGTTC	down	0.479789	-1.05953	0.00015641	0.000140157	64.9949	31.1839	65.5	31.8333	middle
51	PC-3p-4848_186	AAACTCAAATGAACTTTTTGGT	down	0.43876	-1.1885	5.776e-05	4.75333e-05	62.5142	27.4287	63	28	middle
55	PC-3p-12036_48	TAAAACCCGAGCTCCTTGTTAG	down	0.447039	-1.16153	0.00028343	0.000350184	52.5913	23.5103	53	24	middle
25	ola-miR-222_R+7	AGCTACATCTGGCTACTGGGTCTCCT	down	0.315907	-1.66243	7.6153e-06	6.32452e-06	49.6144	15.6736	50	16	middle
45	PC-3p-10719_57	AGGAACCCAGATGAACTTTCT	down	0.420089	-1.25123	0.00031829	0.000344948	46.6376	19.5919	47	20	middle
52	PC-3p-7811_91	AAAAACTAGAATGAACTTTTTGT	down	0.441094	-1.18084	0.00054403	0.000610648	46.6376	20.5715	47	21	middle
95	bta-mir-2285t-p5	AAAAGTTCGTTCAGGTTTTTCT	up	2.24283	1.16532	2.5119e-05	2.82273e-05	44.7688	100.409	45.1167	102.5	middle
34	PC-3p-12034_48	CAAACCCAAGAGAACTTTTTAGT	down	0.374459	-1.41712	0.00016486	0.000202372	43.1646	16.1634	43.5	16.5	middle
19	PC-3p-10629_57	AAACCCAGAGTAAACTTTTTAG	down	0.240783	-2.05419	4.4383e-06	3.57044e-06	40.6838	9.79597	41	10	middle
74	PC-3p-7097_106	AAAACCGGAATGAACTTTTTTGG	down	0.493605	-1.01857	0.0040802	0.00618695	39.6915	19.5919	40	20	middle
105	hsa-miR-6516-3p	ATCATGTATGATACTGCAAACA	up	2.54207	1.346	1.8907e-06	1.78192e-06	39.6915	100.899	40	103	middle
31	bta-miR-138	AGCTGGTGTTGTGAATCAGGCCG	down	0.349897	-1.515	0.00017639	0.000270569	39.1954	13.7144	39.5	14	middle
48	hsa-miR-449b-3p_L-1_1ss12AG	AGCCACAACTGCCCTGCCACT	down	0.430322	-1.21651	0.0012996	0.00183628	38.6993	16.6532	39	17	middle
30	bta-miR-2285m_L+1R-1_1ss7GA	AAAAACACAAATGAACTTTTTG	down	0.338695	-1.56194	0.00026591	0.000229984	35.6232	12.0654	35.9	12.3167	middle
43	PC-3p-9203_71	CTCCCTCGGAACCCGGCTGGGACT	down	0.406498	-1.29868	0.0016839	0.00212551	33.7378	13.7144	34	14	middle
50	hsa-miR-335-3p	TTTTTCATTATTGCTCCTGACC	down	0.435534	-1.19914	0.0029494	0.00384439	33.7378	14.694	34	15	middle
1	bta-miR-133a_L-1R+1	TTGGTCCCCTTCAACCAGCTGT	down	0.0607514	-4.04094	7.4791e-08	1.82083e-08	32.2494	1.95919	32.5	2	middle
49	PC-5p-22686_20	CCAAGACCATACATTAGGTGTA	down	0.431904	-1.21122	0.0036799	0.00463007	31.7532	13.7144	32	14	middle
41	PC-3p-24213_18	AGATGCACTGAATCTATTTGAG	down	0.394884	-1.3405	0.0025735	0.00302536	29.7687	11.7552	30	12	middle
57	PC-3p-11905_49	AAAAACTAGAATGAACTTTTTG	down	0.451774	-1.14633	0.0072921	0.00819303	29.2725	13.2246	29.5	13.5	middle
46	chi-mir-2284b-p3_1ss19AT	AAAATCTGAACAAACTTTTTGG	down	0.42309	-1.24096	0.00573	0.00674704	27.7841	11.7552	28	12	middle
93	aca-miR-200b-3p_R+2	TAATACTGCCTGGTAATGATGATT	up	2.15724	1.10918	0.0021947	0.00226941	26.7918	57.7963	27	59	middle
106	bta-miR-122	TGGAGTGTGACAATGGTGTTTG	up	2.596	1.37629	5.6372e-05	5.94286e-05	26.7918	69.5514	27	71	middle
119	bta-miR-326_R+1	CCTCTGGGCCCTTCCTCCAGT	up	3.47352	1.7964	1.2915e-08	7.21012e-09	26.7918	93.0618	27	95	middle
28	mmu-miR-330-5p_R+1	TCTCTGGGCCTGTGTCTTAGGCT	down	0.335279	-1.57657	0.0016241	0.00212506	26.2957	8.81638	26.5	9	middle
29	eca-miR-330_R+1	TCTCTGGGCCTGTGTCTTAGGCT	down	0.335279	-1.57657	0.0016241	0.00212506	26.2957	8.81638	26.5	9	middle
39	bta-mir-2285o-1-p5_1ss2AC	ACAGAGTTCATTTGGGTTTTT	down	0.392353	-1.34978	0.00481	0.00430922	25.7995	10.1225	26	10.3333	middle
59	PC-3p-6882_110	AAAGCCCGAATGAACTTTTTAGT	down	0.455635	-1.13405	0.012421	0.0145508	25.7995	11.7552	26	12	middle
127	hsa-miR-4286_R+3	ACCCCACTCCTGGTACCATT	up	5.59419	2.48393	9.3497e-17	4.70584e-18	23.8149	133.225	24	136	middle
37	PC-3p-15288_34	AAAACCCGAAGGAACTTTTTTGG	down	0.37808	-1.40323	0.0059392	0.00788777	23.3188	8.81638	23.5	9	middle
47	bta-miR-126-5p	CATTATTACTTTTGGTACGCG	down	0.429222	-1.2202	0.013325	0.0147733	22.8226	9.79597	23	10	middle
129	PC-5p-3461_312	TCTTTGTAGTATCCTGAGT	up	6.48125	2.69627	6.3611e-20	6.07072e-22	22.8226	147.919	23	151	middle
56	PC-3p-16948_30	AAAACCGGGATGAATTTTTTGT	down	0.448732	-1.15607	0.019754	0.0218516	21.8304	9.79597	22	10	middle
107	bta-miR-2440	TGCAGTGATGAGACCCTGGA	up	2.60264	1.37998	0.00026432	0.000269043	21.8304	56.8167	22	58	middle
36	PC-5p-20051_23	AAAAGTTCGTTCGATTTTTCCT	down	0.37608	-1.41089	0.009052	0.014231	20.8381	7.83678	21	8	middle
62	PC-3p-7623_94	AAAACCCTGATGAACTTTTTGA	down	0.4701	-1.08896	0.029035	0.0319798	20.8381	9.79597	21	10	middle
60	PC-3p-25261_17	AAAACCCGAATGTACCTTTTGA	down	0.457488	-1.1282	0.026985	0.0390842	20.3419	9.30618	20.5	9.5	middle
11	hsa-miR-194-3p	CCAGTGGGGCTGCTGTTATCTG	down	0.197442	-2.3405	0.00059543	0.000691286	19.8458	3.91839	20	4	middle
53	ola-miR-100_R+6	AACCCGTAGATCCGAACTTGTGTAA	down	0.444245	-1.17057	0.024958	0.0390842	19.8458	8.81638	20	9	middle
32	ssc-mir-7857-p5_1ss12TG	CATAGCCAGTTGGGGAAGAATGC	down	0.363709	-1.45914	0.011136	0.0168213	18.8535	6.85718	19	7	middle
33	PC-3p-31381_13	AAAAACCCGAATGCACTTCTTG	down	0.363709	-1.45914	0.011136	0.0168213	18.8535	6.85718	19	7	middle
94	bta-miR-34c_R+1	AGGCAGTGTAGTTAGCTGATTGC	up	2.18225	1.12582	0.0088493	0.00978846	18.8535	41.1431	19	42	middle
110	pma-let-7a_2ss12GA19AG	TGAGGTAGTAGATTGTATGGTT	up	2.7971	1.48393	0.0002925	0.000356278	17.8612	49.9595	18	51	middle
4	mml-miR-145-3p_R-1	GGATTCCTGGAAATACTGTTCT	down	0.116142	-3.10603	0.00033767	0.000282874	16.8689	1.95919	17	2	middle
113	bta-miR-211_R+1	TTCCCTTTGTCATCCTTTGCCC	up	3.04874	1.60821	9.4119e-05	0.000130012	16.8689	51.4289	17	52.5	middle
14	PC-3p-19019_25	AAAACCTGAATGAACCTTTTGGT	down	0.211545	-2.24096	0.0049559	0.0061089	13.892	2.93879	14	3	middle
26	PC-3p-10077_62	AAAAACCTGAATGACCCTTTTGG	down	0.317318	-1.656	0.018146	0.0163706	13.892	4.40819	14	4.5	middle
103	bta-miR-2484_R-4	GAGCTATGATGACTTTGATT	up	2.53854	1.344	0.0049003	0.00621407	13.892	35.2655	14	36	middle
104	tch-let-7a-5p	TAAGGTAGTAGATTGTATAGTT	up	2.53854	1.344	0.0049003	0.00621407	13.892	35.2655	14	36	middle
8	PC-3p-28155_15	AAAACCCGAGTGAACTTTTTGG	down	0.146253	-2.77346	0.0022691	0.0032567	13.3959	1.95919	13.5	2	middle
9	bta-miR-145	GTCCAGTTTTCCCAGGAATCCCT	down	0.151878	-2.71901	0.0029784	0.0032567	12.8998	1.95919	13	2	middle
18	PC-5p-36165_10	ACTCCCGGTGGGCAACGCGCC	down	0.227818	-2.13405	0.008323	0.0105461	12.8998	2.93879	13	3	middle
20	PC-5p-19755_24	CAAGTTTGTTCAAGTTTTTCT	down	0.265787	-1.91166	0.013079	0.0105461	12.8998	3.42859	13	3.5	middle
124	PC-3p-7112_105	TTAACCTTCGGGCACTGG	up	4.85378	2.27911	1.8115e-07	1.01017e-07	11.9075	57.7963	12	59	middle
23	PC-5p-50755_7	TGTCCAATGAGATTTCAAACTG	down	0.300455	-1.73478	0.027563	0.03045	11.4113	3.42859	11.5	3.5	middle
115	bta-miR-218_R-1	TTGTGCTTGATCTAACCATGT	up	3.26209	1.70579	0.00052417	0.000417832	11.4113	37.2247	11.5	38	middle
10	PC-3p-14392_37	AAATCCCGAACAAACTTTTTGT	down	0.179493	-2.478	0.0088296	0.0106114	10.9152	1.95919	11	2	middle
116	cgr-miR-1260_R+2	ATCCCACCGCTGCCACCATA	up	3.32062	1.73145	0.00054269	0.00063914	10.9152	36.2451	11	37	middle
125	bta-miR-6516	TTTGCAGTAACAGGTGTGAAC	up	5.23221	2.38742	3.8166e-07	1.49729e-07	9.92289	51.9187	10	53	middle
15	bta-mir-2284i-p3_1ss12TG	AAACCCGGAATGAACTTTTTGG	down	0.213451	-2.22802	0.022778	0.0332814	9.17867	1.95919	9.25	2	middle
16	pma-miR-18a-5p_R+2	TAAGGTGCATCTAGTGCAGATAGTT	down	0.21938	-2.1885	0.02607	0.0332814	8.9306	1.95919	9	2	middle
108	bta-miR-202	TTCCTATGCATATACTTCTTT	up	2.63256	1.39647	0.017838	0.0220836	8.9306	23.5103	9	24	middle
109	pma-miR-204-5p_R+2	TTCCCTTTGTCATCCTATGCCTGT	up	2.63256	1.39647	0.017838	0.0220836	8.9306	23.5103	9	24	middle
114	PC-5p-12163_47	TCTTCCCGGCCAATGCACCA	up	3.08503	1.62529	0.006608	0.0120144	7.93831	24.4899	8	25	middle
120	bta-miR-6121-3p_L+1	GCCGGATGATGGACACTGAGG	up	3.52575	1.81793	0.0032655	0.00387062	6.94602	24.4899	7	25	middle
117	bta-mir-497-p3	CGGCACTGTGGCCACGTC	up	3.35651	1.74696	0.01831	0.0182445	4.96144	16.6532	5	17	middle
128	PC-5p-23374_19	CAGCCTCTGGCATGTTGGA	up	6.17006	2.62529	0.00024373	0.000220646	3.96915	24.4899	4	25	middle
121	bta-mir-7865-p5	AGGCTGTGTGCAGGCCTGCC	up	3.94884	1.98143	0.030866	0.036677	2.97687	11.7552	3	12	middle
122	PC-5p-16864_30	AACGTAGGTTTTATTTTTT	up	3.94884	1.98143	0.030866	0.036677	2.97687	11.7552	3	12	middle
126	cin-miR-33_R+4	GTGCATTGTAGTTGCATTGCAAT	up	5.59419	2.48393	0.0032928	0.00285327	2.97687	16.6532	3	17	middle
123	bta-mir-2285n-5-p5_1ss12TG	CAAAAAGTTCAGTTGAGTTTTT	up	4.2392	2.08379	0.02479	0.036677	2.81148	11.9184	2.83333	12.1667	middle
81	PC-5p-27994_15	TAACATGGAGGTGGCCAGAGT	up	inf	inf	0.0001294	3.47582e-05	0	15.6736	0	16	middle

## Sheet: 12h vs 0h differentially miRNAs
Supplementary Table 4C：The differentially expressed miRNAs in LPS induced 12h bMECs
Index	miR_name	miR_seq	up/down	fold_change(bMEC_Lps_12h/bMEC_Lps_0h)	log2(fold_change)	pvalue(chi_square_2x2)	pvalue(fisher_test)	bMEC_Lps_0h(norm)	bMEC_Lps_12h(norm)	bMEC_Lps_0h(raw)	bMEC_Lps_12h(raw)	Expression level
107	bta-miR-30a-5p	TGTAAACATCCTCGACTGGAAGCT	up	2.25432	1.17269	0	0	109471	246782	110321	193036	high
39	bta-miR-21-3p_L+1R-2	CAACAGCAGTCGATGGGCTGT	down	0.32328	-1.62914	0	0	19598.7	6335.86	19751	4956	high
119	bta-miR-224_R-1	CAAGTCACTAGTGGTTCCGTTT	up	2.44016	1.28697	0	0	10279.1	25082.7	10359	19620	high
109	bta-miR-182	TTTGGCAATGGTAGAACTCACACT	up	2.28274	1.19077	0	0	7832.13	17878.7	7893	13985	high
113	mdo-miR-26-5p_R+2	TTCAAGTAATCCAGGATAGGCTT	up	2.32501	1.21724	0	0	7710.08	17926	7770	14022	high
43	bta-miR-449a	TGGCAGTGTATTGTTAGCTGGT	down	0.36588	-1.45056	0	0	5546.89	2029.5	5590	1587.5	middle
143	bta-miR-200b_R+2	TAATACTGCCTGGTAATGATGAC	up	3.24031	1.69613	0	0	5103.34	16536.4	5143	12935	high
136	bta-miR-19b	TGTGCAAATCCATGCAAAACTGA	up	2.91648	1.54423	0	0	3770.86	10997.6	3800.17	8602.5	high
101	bta-miR-200a	TAACACTGTCTGGTAACGATGTT	up	2.13591	1.09485	0	4.40576e-203	3246.77	6934.8	3272	5424.5	high
54	mml-let-7i-3p_L+1	CTGCGCAAGCTACTGCCTTGCT	down	0.426885	-1.22808	0	6.02153e-163	2323.94	992.056	2342	776	middle
102	bta-miR-95_R-1	TTCAACGGGTATTTATTGAGC	up	2.14984	1.10423	2.4512e-83	1.30929e-85	1320.74	2839.38	1331	2221	middle
122	bta-miR-19a_2ss11TC23AT	TGTGCAAATCCATGCAAAACTGT	up	2.55412	1.35282	0	1.15227e-136	1206.79	3082.28	1216.17	2411	middle
138	hhi-miR-26_R+3	TTCAAGTAATCCAGGATAGGCTTA	up	2.97942	1.57503	0	8.87086e-152	876.191	2610.54	883	2042	middle
126	bta-miR-1839_R-2	AAGGTAGATAGAACAGGTCTTG	up	2.66716	1.4153	0	8.76412e-97	749.178	1998.17	755	1563	middle
40	hsa-miR-33b-3p_R-1	CAGTGCCTCGGCAGTGCAGCC	down	0.328076	-1.6079	1.4197e-52	3.19135e-54	533.851	175.144	538	137	middle
115	mmu-let-7j_1ss8TG	TGAGGTAGTAGTTTGTGCTGTTAT	up	2.34179	1.22761	2.0161e-44	6.9015e-46	516.982	1210.67	521	947	middle
53	bta-miR-449b_R+3	AGGCAGTGTATTGTTAGCTGGCTGC	down	0.420764	-1.24892	9.9615e-38	3.56865e-38	514.998	216.693	519	169.5	middle
114	ssa-miR-10d-5p_L-1R+3	ACCCTGTAGAACCGAATTTGTGTT	up	2.33898	1.22588	3.7945e-29	3.89602e-30	333.409	779.838	336	610	middle
61	PC-3p-4634_200	AAAACCTGAATGACCCTTTTGG	down	0.454012	-1.1392	1.2121e-21	1.04101e-21	321.005	145.74	323.5	114	middle
47	mmu-miR-15a-3p_2ss10CT22AT	CAGGCCATATTGTGCTGCCTCT	down	0.397041	-1.33264	1.2089e-25	3.55873e-26	315.548	125.285	318	98	middle
108	xtr-miR-221_R+2	AGCTACATTGTCTGCTGGGTTTCTT	up	2.26835	1.18165	3.1378e-24	6.16184e-25	302.648	686.513	305	537	middle
125	gga-miR-3535_L+1_1ss25AG	TGGATATGATGACTGATTATCTGAGA	up	2.62918	1.39461	2.501e-27	1.5542e-28	219.296	576.569	221	451	middle
105	bta-let-7c_R+2_1ss17AG	TGAGGTAGTAGGTTGTGTGGTTTA	up	2.22023	1.15071	3.1094e-15	1.24278e-15	196.235	435.687	197.76	340.8	middle
66	bta-mir-2285ab-p5	GAAAGTTTGTTCTGGTCTTTCT	down	0.481439	-1.05458	3.2517e-12	2.84729e-12	188.535	90.768	190	71	middle
3	bta-miR-451_R-1	AAACCGTTACCATTACTGAGTT	down	0.126724	-2.98024	1.8226e-33	8.39122e-37	181.589	23.0116	183	18	middle
131	bta-miR-146a_R-2	TGAGAACTGAATTCCATAGGTT	up	2.76813	1.46891	4.6352e-25	4.37504e-26	173.651	480.687	175	376	middle
93	oha-miR-30b-5p_R+3	TGTAAACATCCTACACTCAGCTTTT	up	2.00744	1.00536	9.9685e-10	8.40116e-10	170.674	342.617	172	268	middle
57	mml-miR-449a-3p_L+1_1ss21GA	TCAGCTAACATGCAACTGCTATC	down	0.441723	-1.17879	1.3043e-10	8.95142e-11	138.92	61.3643	140	48	middle
154	bta-miR-143_1ss22GT	TGAGATGAAGCACTGTAGCTCT	up	6.48813	2.6978	0	7.38971e-116	137.928	894.896	139	700	middle
116	mmu-miR-200b-5p	CATCTTACTGGGCAGCATTGGA	up	2.3636	1.24099	7.5627e-13	4.07215e-13	131.974	311.935	133	244	middle
121	bta-miR-664b_R+1	TATTCATTTATCTCCCAGCCTACA	up	2.54765	1.34917	9.6422e-16	3.45511e-16	131.974	336.225	133	263	middle
104	dre-miR-30e-5p_R+2_1ss13TC	TGTAAACATCCTCGACTGGAAGCC	up	2.20418	1.14024	6.4219e-10	5.91002e-10	123.54	272.304	124.5	213	middle
134	ccr-miR-17-5p_R+2	CAAAGTGCTTACAGTGCAGGTAGAA	up	2.86764	1.51986	7.744e-20	1.07166e-20	123.044	352.845	124	276	middle
97	mmu-miR-30c-5p_R+1	TGTAAACATCCTACACTCTCAGCG	up	2.05225	1.03721	2.34e-07	1.70603e-07	112.129	230.116	113	180	middle
55	bta-miR-2355-5p_L+2R-2	TTCCCAGATACAATGGACAATAT	down	0.429453	-1.21943	1.2887e-08	1.42058e-08	104.19	44.7448	105	35	middle
132	ssa-miR-10d-5p_R+4_1ss1CT	TACCCTGTAGAACCGAATTTGTGTTT	up	2.82546	1.49848	6.9734e-16	1.46429e-16	100.221	283.171	101	221.5	middle
112	mmu-miR-1839-3p	AGACCTACTTATCTACCAACAGC	up	2.31644	1.21191	2.1175e-09	1.04272e-09	98.2366	227.559	99	178	middle
24	hsa-miR-802_L+1R-2	TCAGTAACAAAGATTCATCCTT	down	0.228147	-2.13197	5.1986e-14	2.15767e-14	95.2597	21.7332	96	17	middle
96	PC-5p-2352_548	GAAAGTTTGTTGGGGTTTTTCT	up	2.03757	1.02685	4.2071e-06	3.16115e-06	91.2906	186.011	92	145.5	middle
65	PC-3p-7967_88	CCCAAGTGAACTTGTTGGCC	down	0.475814	-1.07153	1.6634e-06	2.27787e-06	87.3214	41.5487	88	32.5	middle
118	aca-miR-128-3p_R+2	TCACAGTGAACCGGTCTCTTTTT	up	2.42863	1.28014	1.4643e-09	6.54868e-10	86.3291	209.661	87	164	middle
34	PC-3p-6776_112	TGCTATCTCTATAAGTATCAGA	down	0.309858	-1.69032	1.7465e-09	1.55964e-09	78.3908	24.29	79	19	middle
41	bta-miR-138_R+1	AGCTGGTGTTGTGAATCAGGCCGT	down	0.349103	-1.51827	2.1732e-08	1.8101e-08	76.9024	26.8469	77.5	21	middle
58	PC-5p-6623_116	ATGCCTTCCCCAGCCTCCGAGC	down	0.446631	-1.16285	3.1181e-06	3.72424e-06	74.4217	33.239	75	26	middle
98	pma-miR-30a-5p_R+2	TGTAAACATCCTCGACTGGAAGCCT	up	2.06137	1.04361	2.1588e-05	1.86001e-05	74.4217	153.411	75	120	middle
94	mmu-miR-29b-1-5p_R+2	GCTGGTTTCATATGGTGGTTTAGA	up	2.01196	1.0086	6.384e-05	5.61498e-05	72.4371	145.74	73	114	middle
95	mmu-miR-6240_L-1R-6	CAAAGCATCGCGAAGGCCC	up	2.01566	1.01125	0.0002173	0.000293927	61.5219	124.007	62	97	middle
120	hsa-miR-574-5p_R+2	TGAGTGTGTGTGTGTGAGTGTGTGT	up	2.4493	1.29237	3.1162e-07	2.7722e-07	60.1988	147.445	60.6667	115.333	middle
140	aca-miR-21-5p_L+2R+1	AATAGCTTATCAGACTGATGTTGAC	up	3.05712	1.61217	9.5077e-12	4.16199e-12	58.545	178.979	59	140	middle
32	aca-miR-99b-5p_R-1	AACCCGTAGATCCGAACTTGCG	down	0.304521	-1.71539	4.0753e-07	3.54537e-07	54.5759	16.6195	55	13	middle
44	hsa-miR-219a-5p_R+2	TGATTGTCCAAACGCAATTCTCG	down	0.380372	-1.39452	1.2153e-05	1.47489e-05	52.0952	19.8156	52.5	15.5	middle
103	ssa-miR-30d-2-3p_2ss1TC23TA	CTTTCAGTCGGATGTTTGCAGCA	up	2.15603	1.10838	0.00019196	0.000190464	48.6221	104.831	49	82	middle
100	hsa-miR-135a-3p_L+1R-1	ATATAGGGATTGGAGCCGTGGC	up	2.12042	1.08435	0.00034111	0.000386229	47.6299	100.995	48	79	middle
52	PC-3p-7811_91	AAAAACTAGAATGAACTTTTTGT	down	0.411178	-1.28216	8.5614e-05	6.38822e-05	46.6376	19.1763	47	15	middle
56	PC-3p-10719_57	AGGAACCCAGATGAACTTTCT	down	0.43859	-1.18906	0.00018082	0.000122038	46.6376	20.4548	47	16	middle
141	cgr-miR-486-5p_R+2	TCCTGTACTGAGCTGCCCCGAGTT	up	3.15236	1.65643	2.7877e-10	1.25695e-10	46.6376	147.019	47	115	middle
19	PC-3p-10629_57	AAACCCAGAGTAAACTTTTTAG	down	0.18854	-2.40706	1.8174e-07	1.42936e-07	40.6838	7.67054	41	6	middle
29	bta-miR-138	AGCTGGTGTTGTGAATCAGGCCG	down	0.260933	-1.93825	4.3531e-06	4.14073e-06	39.1954	10.2274	39.5	8	middle
51	bta-mir-2285q-p5	AAAAAGTTCATTCAGGTTTTCT	down	0.409308	-1.28874	0.00032613	0.000361112	38.7819	15.8738	39.0833	12.4167	middle
64	mmu-miR-185-3p_2ss18TC21TC	AGGGGCTGGCTTTCCTCCGGC	down	0.462487	-1.11251	0.0010838	0.00125323	38.6993	17.8979	39	14	middle
70	hsa-miR-449b-3p_L-1_1ss12AG	AGCCACAACTGCCCTGCCACT	down	0.495522	-1.01298	0.0021107	0.00220173	38.6993	19.1763	39	15	middle
30	bta-miR-2285m_L+1R-1_1ss7GA	AAAAACACAAATGAACTTTTTG	down	0.286202	-1.80489	2.5345e-05	1.92582e-05	35.6232	10.1954	35.9	7.975	middle
71	bta-miR-133a_L-1R+1	TTGGTCCCCTTCAACCAGCTGT	down	-inf	-inf	1.3094e-09	2.62865e-11	32.2494	0	32.5	0	middle
38	PC-5p-22686_20	CCAAGACCATACATTAGGTGTA	down	0.322089	-1.63447	0.0001717	0.000141059	31.7532	10.2274	32	8	middle
137	hsa-miR-342-5p_R+5_1ss17AG	AGGGGTGCTATCTGTGGTTGAGGACA	up	2.97933	1.57499	1.1671e-06	7.2656e-07	31.7532	94.6033	32	74	middle
31	PC-3p-24213_18	AGATGCACTGAATCTATTTGAG	down	0.300617	-1.734	0.00016712	0.000157243	29.7687	8.94896	30	7	middle
22	bta-miR-142-5p_R+1	CATAAAGTAGAAAGCACTACT	down	0.222131	-2.17052	2.9878e-05	2.12607e-05	28.7764	6.39211	29	5	middle
110	bta-miR-326_R+1	CCTCTGGGCCCTTCCTCCAGT	up	2.29041	1.19561	0.0021392	0.00263879	26.7918	61.3643	27	48	middle
128	bta-miR-122	TGGAGTGTGACAATGGTGTTTG	up	2.67215	1.418	0.00010817	0.000107575	26.7918	71.5917	27	56	middle
146	aca-miR-200b-3p_R+2	TAATACTGCCTGGTAATGATGATT	up	3.34019	1.73993	3.139e-07	3.05427e-07	26.7918	89.4896	27	70	middle
68	mmu-miR-330-5p_R+1	TCTCTGGGCCTGTGTCTTAGGCT	down	0.486173	-1.04046	0.0099124	0.0152975	26.2957	12.7842	26.5	10	middle
69	eca-miR-330_R+1	TCTCTGGGCCTGTGTCTTAGGCT	down	0.486173	-1.04046	0.0099124	0.0152975	26.2957	12.7842	26.5	10	middle
99	bta-miR-99a-5p	AACCCGTAGATCCGATCTTGT	up	2.06623	1.047	0.011204	0.0132173	26.2957	54.333	26.5	42.5	middle
46	ssc-miR-769-3p_R-1_1ss19TC	CTGGGATCTCTGGGGTCTCGGT	down	0.396418	-1.33491	0.0027319	0.00235909	25.7995	10.2274	26	8	middle
50	bta-mir-2285o-1-p5_1ss2AC	ACAGAGTTCATTTGGGTTTTT	down	0.408806	-1.29051	0.0033509	0.00467016	25.7995	10.547	26	8.25	middle
144	xtr-miR-93b_L+2R+2	CAAAGTGCTGTTCGTGCAGGTAGAT	up	3.32826	1.73477	1.5645e-06	1.3854e-06	23.8149	79.2622	24	62	middle
145	hsa-miR-4286_R+3	ACCCCACTCCTGGTACCATT	up	3.32826	1.73477	1.5645e-06	1.3854e-06	23.8149	79.2622	24	62	middle
42	PC-3p-16519_31	GAAAACCCGAAGGAACTTTTTGT	down	0.356354	-1.48862	0.0023193	0.00325486	23.3188	8.30975	23.5	6.5	middle
23	bta-miR-2284p	TGAAAGTTTGTTCGGGATTTT	down	0.224062	-2.15803	0.00020988	0.000183247	22.8226	5.11369	23	4	middle
45	PC-5p-13237_42	TGAGTCTCATCTGAATCAGA	down	0.392109	-1.35067	0.0045266	0.00686595	22.8226	8.94896	23	7	middle
59	bta-miR-126-5p	CATTATTACTTTTGGTACGCG	down	0.448124	-1.15803	0.010015	0.0087105	22.8226	10.2274	23	8	middle
147	PC-5p-3461_312	TCTTTGTAGTATCCTGAGT	up	3.52898	1.81925	5.2174e-07	3.12321e-07	22.8226	80.5406	23	63	middle
12	bta-miR-144_R-3	TACAGTATAGATGATGTAC	down	0.175685	-2.50894	9.8473e-05	9.65251e-05	21.8304	3.83527	22	3	middle
67	bta-miR-2285o_R+2	AAACCCGAACGAACTTTTGGGC	down	0.484898	-1.04425	0.020475	0.0290726	21.1357	10.2487	21.3	8.01667	middle
48	PC-5p-20051_23	AAAAGTTCGTTCGATTTTTCCT	down	0.398777	-1.32634	0.0073158	0.00801648	20.8381	8.30975	21	6.5	middle
35	PC-3p-15032_35	AAAACACTCGAACAAACATTTT	down	0.314234	-1.67009	0.0023247	0.00253333	20.3419	6.39211	20.5	5	middle
27	PC-3p-13886_39	ACCCAAAGGAACATTTTGGCT	down	0.257672	-1.95639	0.0010193	0.000959051	19.8458	5.11369	20	4	middle
37	hsa-miR-194-3p	CCAGTGGGGCTGCTGTTATCTG	down	0.322089	-1.63447	0.0029735	0.00253333	19.8458	6.39211	20	5	middle
60	PC-5p-22035_21	TTCCGGGCCCCTTGAATCTCGA	down	0.450925	-1.14904	0.016873	0.0238356	19.8458	8.94896	20	7	middle
1	PC-3p-31381_13	AAAAACCCGAATGCACTTCTTG	down	0.0678083	-3.88239	2.4232e-05	9.22887e-06	18.8535	1.27842	19	1	middle
111	bta-miR-34c_R+1	AGGCAGTGTAGTTAGCTGATTGC	up	2.30548	1.20507	0.009233	0.0149061	18.8535	43.4664	19	34	middle
129	pma-let-7a_2ss12GA19AG	TGAGGTAGTAGATTGTATGGTT	up	2.71987	1.44354	0.0012011	0.00128101	17.8612	48.5801	18	38	middle
133	pol-let-7a-5p_R+3_1ss17AG	TGAGGTAGTAGGTTGTGTGGTTTGT	up	2.82723	1.49939	0.00064966	0.000897278	17.8612	50.4977	18	39.5	middle
62	hsa-miR-877-3p_R+1	TCCTCTTCTCCCTCCTCCCAGT	down	0.454715	-1.13697	0.028668	0.0434186	16.8689	7.67054	17	6	middle
117	ssa-miR-155-5p_R+3	TTAATGCTAATCGTGATAGGGGTTTA	up	2.42514	1.27807	0.0076376	0.00822766	16.8689	40.9095	17	32	middle
124	oan-miR-96-5p_R+2	TTTGGCACTAGCACATTTTTGCTTT	up	2.57672	1.36553	0.003515	0.0042568	16.8689	43.4664	17	34	middle
7	bta-miR-7863	ATGGACTGTCACCTGAGGAGC	down	0.161045	-2.63447	0.00069222	0.000993375	15.8766	2.55685	16	2	middle
49	PC-3p-28322_14	TAGTTCACCTATGTGTCTGTCC	down	0.402612	-1.31254	0.020026	0.0176617	15.8766	6.39211	16	5	middle
106	PC-3p-20118_23	AGAAAGCCGGCGGCTGCAGCT	up	2.23315	1.15908	0.028268	0.0417502	14.8843	33.239	15	26	middle
17	PC-3p-19019_25	AAAACCTGAATGAACCTTTTGGT	down	0.184051	-2.44182	0.0021494	0.00560898	13.892	2.55685	14	2	middle
63	bta-miR-2415-3p_R+1	CCAGGCCTGCTGGACCGACGCC	down	0.460128	-1.11989	0.049266	0.043625	13.892	6.39211	14	5	middle
127	bta-miR-2484_R-4	GAGCTATGATGACTTTGATT	up	2.66874	1.41616	0.0053878	0.00709143	13.892	37.0743	14	29	middle
142	pma-miR-196b_R+3_1ss9AT	TAGGTAGTTTCATGTTGTTGGGTAT	up	3.22089	1.68746	0.00041207	0.000357172	13.892	44.7448	14	35	middle
2	PC-3p-28155_15	AAAACCCGAGTGAACTTTTTGG	down	0.0954339	-3.38935	0.00061911	0.000548109	13.3959	1.27842	13.5	1	middle
26	PC-5p-19755_24	CAAGTTTGTTCAAGTTTTTCT	down	0.247761	-2.01298	0.0071689	0.00970571	12.8998	3.19606	13	2.5	middle
155	bta-miR-145	GTCCAGTTTTCCCAGGAATCCCT	up	6.54089	2.70949	3.8037e-11	5.01485e-12	12.8998	84.3759	13	66	middle
21	PC-5p-37904_10	TCTTGAACTGGCCCAGTGGTC	down	0.214726	-2.21943	0.0066252	0.0166542	11.9075	2.55685	12	2	middle
36	bta-miR-2382-3p_L-1R+1	TACTTCCTGGTGCCTCGCCCCACT	down	0.322089	-1.63447	0.021397	0.0255258	11.9075	3.83527	12	3	middle
25	PC-3p-20887_22	AAAAACCTGAACAAACTTTTTGT	down	0.245401	-2.02678	0.015299	0.047522	10.419	2.55685	10.5	2	middle
33	bta-miR-18b_R-3	TAAGGTGCATCTAGTGCAG	down	0.306752	-1.70486	0.027423	0.047522	10.419	3.19606	10.5	2.5	middle
150	bta-miR-6516	TTTGCAGTAACAGGTGTGAAC	up	4.76692	2.25306	8.4895e-06	6.5205e-06	9.92289	47.3016	10	37	middle
4	bta-miR-202	TTCCTATGCATATACTTCTTT	down	0.143151	-2.80439	0.0090241	0.00797869	8.9306	1.27842	9	1	middle
5	PC-3p-17393_29	ACACTGGTGCTCTGTGGGA	down	0.143151	-2.80439	0.0090241	0.00797869	8.9306	1.27842	9	1	middle
123	pma-miR-204-5p_R+2	TTCCCTTTGTCATCCTATGCCTGT	up	2.57672	1.36553	0.033699	0.0496062	8.9306	23.0116	9	18	middle
139	oan-miR-30d-5p_R+1_1ss12CA	TGTAAACATCCACGACTGGAAGCT	up	3.00617	1.58793	0.0091376	0.011247	8.9306	26.8469	9	21	middle
135	PC-5p-12163_47	TCTTCCCGGCCAATGCACCA	up	2.8988	1.53546	0.018876	0.0197303	7.93831	23.0116	8	18	middle
130	bta-miR-6121-3p_L+1	GCCGGATGATGGACACTGAGG	up	2.76077	1.46507	0.039337	0.0493775	6.94602	19.1763	7	15	middle
152	fru-miR-200a_R+3	TAACACTGTCTGGTAACGATGTTTT	up	6.01234	2.58793	2.6467e-05	1.5048e-05	5.95373	35.7958	6	28	middle
149	mmu-miR-5106_L-1R-4_1ss3GC	GCTCTGTAGCTCAGTTGG	up	3.86507	1.9505	0.010019	0.0128771	4.96144	19.1763	5	15	middle
151	hsa-miR-4448_1ss6CG	GGCTCGTTGGTCTAGGGGTA	up	4.83134	2.27242	0.0043701	0.00549518	3.96915	19.1763	4	15	middle
160	oan-let-7f-5p_R+3	TGAGGTAGTAGATTGTATAGTTATT	up	9.0185	3.17289	1.4126e-05	2.79387e-06	3.47301	31.3214	3.5	24.5	middle
148	pma-miR-204-5p_R+3	TTCCCTTTGTCATCCTATGCCTGTT	up	3.86507	1.9505	0.046073	0.0409935	2.97687	11.5058	3	9	middle
158	bta-miR-2350_R+1	CAGCTCCTGTTTCTCTCCTCAGT	up	8.37433	3.06597	0.0018358	0.00183543	1.98458	16.6195	2	13	middle
153	xtr-miR-301_R+3_1ss4TC	CAGCGCAATAGTATTGTCAAAGCATT	up	6.44179	2.68746	0.026471	0.0136086	1.48843	9.58817	1.5	7.5	middle
157	PC-5p-41210_9	TCAGTGGCAGAGTGCAGGGACCT	up	7.73015	2.9505	0.037565	0.0427442	0.992289	7.67054	1	6	middle
161	PC-3p-56946_6	CTCTCCAGTGCGCACCCCCGTC	up	10.3069	3.36553	0.011025	0.0136086	0.992289	10.2274	1	8	middle
162	ola-let-7g_R+5_1ss18TC	TGAGGTAGTAGTTTGTACAGTTTTT	up	16.7487	4.06597	0.00055084	0.0002259	0.992289	16.6195	1	13	middle
163	bta-miR-205_R+1	TCCTTCATTCCACCGGAGTCTGT	up	86.32	6.43162	1.8899e-17	1.96175e-22	0.992289	85.6543	1	67	middle
